# Supplementary material for: EVALUATING DESIRABLE CHARACTERISTICS OF PHD SUPERVISORS IN AN OPEN DISTANCE LEARNING CONTEXT
Source: Springer Nature journal article supplement (doi:10.1038/s41596-021-00582-6), 2010-01-01
Supplement: MOESM2 [file 41596_2021_582_MOESM2_ESM23.xlsx]

## Sheet: Sheet1
Supplementary Data Table 1. SorTnSeq_results_depleted_unique_insertions.xlsx
seqid	type	start	end	product	id	high_logFC	high_p.value	high_p.adj	low_logFC	low_p.value	low_p.adj	logCPM	input_logFC	input_p.value	input_p.adj	source	strand	name	locus_tag	bound_moiety	dbxref	other	gbkey	gene	gene_synonym	note	old_locus_tag	source.child	type.child	dbxref.child	gbkey.child	inference.child	note.child
NZ_CP025085.1	intergenic	1	200		intergenic_NZ_CP025085.1-nt00000001	0.660193	0.061389	0.642244	0.895776	0.00601677	0.207658	8.22129	0.00818478	1	1	SorTnSeq	+	intergenic_NZ_CP025085.1-nt00000001
NZ_CP025085.1	gene	201	1640	aspartate ammonia-lyase	gene-CWC46_RS00005	0.143017	0.544106	1	-0.169498	0.493328	0.937974	9.42583	0.0830465	0.577949	1	RefSeq	+	aspA	CWC46_RS00005				Gene	aspA			CWC46_00005	Protein Homology	CDS	Genbank:WP_021014250.1	CDS	COORDINATES: similar to AA sequence:RefSeq:WP_010298348.1
NZ_CP025085.1	intergenic	1641	1962		intergenic_NZ_CP025085.1-nt00001641	-1.03742	0.423951	0.975577	-1.16017	0.266847	0.767807	6.07011	-0.451227	0.473131	1	SorTnSeq	+	intergenic_NZ_CP025085.1-nt00001641
NZ_CP025085.1	gene	1963	3264	anaerobic C4-dicarboxylate transporter	gene-CWC46_RS00015	-0.634617	0.206741	0.835947	-0.487278	0.266417	0.767807	8.05154	-0.116767	0.652129	1	RefSeq	+	CWC46_RS00015	CWC46_RS00015				Gene				CWC46_00015	Protein Homology	CDS	Genbank:WP_021014249.1	CDS	COORDINATES: similar to AA sequence:RefSeq:YP_005224673.1
NZ_CP025085.1	intergenic	3265	4199		intergenic_NZ_CP025085.1-nt00003265	-0.100498	0.699225	1	0.385011	0.0508362	0.484966	9.68147	0.101958	0.441584	1	SorTnSeq	+	intergenic_NZ_CP025085.1-nt00003265
NZ_CP025085.1	gene	4200	5372	xylanase	gene-CWC46_RS00020	-0.0300146	0.956635	1	-0.0143924	1	1	10.0314	-0.0453255	0.736305	1	RefSeq	+	CWC46_RS00020	CWC46_RS00020				Gene				CWC46_00020	Protein Homology	CDS	Genbank:WP_168187284.1	CDS	COORDINATES: similar to AA sequence:RefSeq:WP_014506795.1
NZ_CP025085.1	intergenic	5373	5531		intergenic_NZ_CP025085.1-nt00005373	-0.684625	0.523468	1	-1.20779	0.115319	0.608972	6.49124	-0.416577	0.391606	1	SorTnSeq	+	intergenic_NZ_CP025085.1-nt00005373
NZ_CP025085.1	gene	5532	6881	MFS transporter	gene-CWC46_RS00025	-1.20213	0.0364847	0.553515	-0.975492	0.0580659	0.506895	7.65489	-0.0343656	0.931709	1	RefSeq	-	CWC46_RS00025	CWC46_RS00025				Gene				CWC46_00025	Protein Homology	CDS	Genbank:WP_021014247.1	CDS	COORDINATES: similar to AA sequence:RefSeq:WP_015847970.1
NZ_CP025085.1	intergenic	6882	7554		intergenic_NZ_CP025085.1-nt00006882	0.369998	0.278005	0.895025	-0.398994	0.41599	0.895847	8.07623	0.120433	0.646491	1	SorTnSeq	+	intergenic_NZ_CP025085.1-nt00006882
NZ_CP025085.1	gene	7555	7884	hypothetical protein	gene-CWC46_RS00030	0.251595	0.831812	1	-0.442343	0.647607	1	6.41632	-0.109717	1	1	RefSeq	+	CWC46_RS00030	CWC46_RS00030				Gene				CWC46_00030	Protein Homology	CDS	Genbank:WP_021014246.1	CDS	COORDINATES: similar to AA sequence:RefSeq:WP_019452631.1
NZ_CP025085.1	intergenic	7885	7924		intergenic_NZ_CP025085.1-nt00007885											SorTnSeq	+	intergenic_NZ_CP025085.1-nt00007885
NZ_CP025085.1	gene	7925	8479	glycine zipper family protein	gene-CWC46_RS00035	-0.571855	0.663625	1	0.273223	1	1	6.67933	0.137894	0.783848	1	RefSeq	+	CWC46_RS00035	CWC46_RS00035				Gene				CWC46_00035	Protein Homology	CDS	Genbank:WP_021014245.1	CDS	COORDINATES: similar to AA sequence:RefSeq:WP_019452630.1
NZ_CP025085.1	intergenic	8480	8490		intergenic_NZ_CP025085.1-nt00008480											SorTnSeq	+	intergenic_NZ_CP025085.1-nt00008480
NZ_CP025085.1	pseudogene	8491	8897	DNA primase	gene-CWC46_RS00040	-0.315837	0.81453	1	0.123823	1	1	6.39697	-0.178762	0.87463	1	RefSeq	+	CWC46_RS00040	CWC46_RS00040			partialpseudo	Gene				CWC46_00040	Protein Homology	CDS		CDS	COORDINATES: similar to AA sequence:RefSeq:WP_011148552.1	frameshifted%3B internal stop%3B incomplete%3B partial in the middle of a contig%3B missing N-terminus
NZ_CP025085.1	intergenic	8898	9001		intergenic_NZ_CP025085.1-nt00008898											SorTnSeq	+	intergenic_NZ_CP025085.1-nt00008898
NZ_CP025085.1	gene	9002	10336	type II toxin-antitoxin system HipA family toxin	gene-CWC46_RS00045	-0.769667	0.0911894	0.694008	-0.489092	0.301877	0.790627	8.03904	0.0599997	0.822171	1	RefSeq	-	CWC46_RS00045	CWC46_RS00045				Gene				CWC46_00045	Protein Homology	CDS	Genbank:WP_021014243.1	CDS	COORDINATES: similar to AA sequence:RefSeq:WP_000088046.1
NZ_CP025085.1	intergenic	10337	10340		intergenic_NZ_CP025085.1-nt00010337											SorTnSeq	+	intergenic_NZ_CP025085.1-nt00010337
NZ_CP025085.1	gene	10341	10646	helix-turn-helix transcriptional regulator	gene-CWC46_RS00050											RefSeq	-	CWC46_RS00050	CWC46_RS00050				Gene				CWC46_00050	Protein Homology	CDS	Genbank:WP_021014242.1	CDS	COORDINATES: similar to AA sequence:RefSeq:WP_001314389.1
NZ_CP025085.1	intergenic	10647	10952		intergenic_NZ_CP025085.1-nt00010647											SorTnSeq	+	intergenic_NZ_CP025085.1-nt00010647
NZ_CP025085.1	gene	10953	11129	CopG family transcriptional regulator	gene-CWC46_RS00055											RefSeq	-	CWC46_RS00055	CWC46_RS00055				Gene				CWC46_00055	Protein Homology	CDS	Genbank:WP_084297583.1	CDS	COORDINATES: similar to AA sequence:RefSeq:WP_004155191.1
NZ_CP025085.1	intergenic	11130	11804		intergenic_NZ_CP025085.1-nt00011130	0.39894	0.823803	1	-0.691396	0.607239	0.986286	6.31679	-0.102042	1	1	SorTnSeq	+	intergenic_NZ_CP025085.1-nt00011130
NZ_CP025085.1	gene	11805	12125	type II toxin-antitoxin system RelE/ParE family toxin	gene-CWC46_RS00060											RefSeq	+	CWC46_RS00060	CWC46_RS00060				Gene				CWC46_00060	Protein Homology	CDS	Genbank:WP_021014239.1	CDS	COORDINATES: similar to AA sequence:RefSeq:WP_015855195.1
NZ_CP025085.1	gene	12115	12399	helix-turn-helix transcriptional regulator	gene-CWC46_RS00065	0.944435	0.548829	1	-1.02199	0.6875	1	5.7421	0.134201	1	1	RefSeq	+	CWC46_RS00065	CWC46_RS00065				Gene				CWC46_00065	Protein Homology	CDS	Genbank:WP_021014238.1	CDS	COORDINATES: similar to AA sequence:RefSeq:WP_010298306.1
NZ_CP025085.1	intergenic	12400	12823		intergenic_NZ_CP025085.1-nt00012400	-1.85551	0.226563	0.835947	-0.527168	0.607239	0.986286	6.11819	-0.0925472	1	1	SorTnSeq	+	intergenic_NZ_CP025085.1-nt00012400
NZ_CP025085.1	pseudogene	12824	14079	tyrosine-type recombinase/integrase	gene-CWC46_RS00075	-1.25668	0.0356989	0.543249	-1.38496	0.025897	0.381412	7.54479	0.0886714	0.789399	1	RefSeq	-	CWC46_RS00075	CWC46_RS00075			pseudo	Gene				CWC46_00075	Protein Homology	CDS		CDS	COORDINATES: similar to AA sequence:RefSeq:WP_015855197.1	frameshifted
NZ_CP025085.1	intergenic	14080	14434		intergenic_NZ_CP025085.1-nt00014080											SorTnSeq	+	intergenic_NZ_CP025085.1-nt00014080
NZ_CP025085.1	gene	14435	15241	helix-turn-helix domain-containing protein	gene-CWC46_RS00080	-0.91037	0.281043	0.895025	-0.782513	0.215329	0.723946	7.17604	0.322183	0.294476	1	RefSeq	-	CWC46_RS00080	CWC46_RS00080				Gene				CWC46_00080	Protein Homology	CDS	Genbank:WP_021014235.1	CDS	COORDINATES: similar to AA sequence:RefSeq:WP_014837283.1
NZ_CP025085.1	intergenic	15242	15421		intergenic_NZ_CP025085.1-nt00015242	-0.00440138	1	1	-0.838825	0.332307	0.824141	6.31678	-0.327636	0.627104	1	SorTnSeq	+	intergenic_NZ_CP025085.1-nt00015242
NZ_CP025085.1	gene	15422	15817	hypothetical protein	gene-CWC46_RS00085	-0.210313	0.86794	1	0.64656	0.183927	0.68696	7.14177	-0.105125	0.817556	1	RefSeq	-	CWC46_RS00085	CWC46_RS00085				Gene				CWC46_00085	Protein Homology	CDS	Genbank:WP_021014234.1	CDS	COORDINATES: similar to AA sequence:RefSeq:WP_004186793.1
NZ_CP025085.1	intergenic	15818	15853		intergenic_NZ_CP025085.1-nt00015818											SorTnSeq	+	intergenic_NZ_CP025085.1-nt00015818
NZ_CP025085.1	gene	15854	16129	type II toxin-antitoxin system RelE/ParE family toxin	gene-CWC46_RS00090	-0.665439	0.548829	1	-0.239369	0.774414	1	5.99484	-0.0731652	1	1	RefSeq	-	CWC46_RS00090	CWC46_RS00090				Gene				CWC46_00090	Protein Homology	CDS	Genbank:WP_021014233.1	CDS	COORDINATES: similar to AA sequence:RefSeq:WP_012015892.1
NZ_CP025085.1	intergenic	16130	16132		intergenic_NZ_CP025085.1-nt00016130											SorTnSeq	+	intergenic_NZ_CP025085.1-nt00016130
NZ_CP025085.1	gene	16133	16381	ribbon-helix-helix protein%2C CopG family	gene-CWC46_RS00095											RefSeq	-	CWC46_RS00095	CWC46_RS00095				Gene				CWC46_00095	Protein Homology	CDS	Genbank:WP_021014232.1	CDS	COORDINATES: similar to AA sequence:RefSeq:WP_004155191.1
NZ_CP025085.1	intergenic	16382	16490		intergenic_NZ_CP025085.1-nt00016382											SorTnSeq	+	intergenic_NZ_CP025085.1-nt00016382
NZ_CP025085.1	gene	16491	17324	DUF4942 domain-containing protein	gene-CWC46_RS00100	0.61656	0.324011	0.921205	0.078554	1	1	7.11826	0.383444	0.301877	1	RefSeq	-	CWC46_RS00100	CWC46_RS00100				Gene				CWC46_00100	Protein Homology	CDS	Genbank:WP_021014231.1	CDS	COORDINATES: similar to AA sequence:RefSeq:WP_013364722.1
NZ_CP025085.1	intergenic	17325	18262		intergenic_NZ_CP025085.1-nt00017325	0.0244648	1	1	0.0565869	1	1	8.33217	-0.041782	0.833704	1	SorTnSeq	+	intergenic_NZ_CP025085.1-nt00017325
NZ_CP025085.1	gene	18263	21550	hypothetical protein	gene-CWC46_RS00105	-0.637127	0.00516077	0.238485	-0.225129	0.294644	0.787934	9.75505	-0.0837659	0.467282	1	RefSeq	+	CWC46_RS00105	CWC46_RS00105				Gene				CWC46_00105	Protein Homology	CDS	Genbank:WP_021014230.1	CDS	COORDINATES: similar to AA sequence:RefSeq:WP_015836016.1
NZ_CP025085.1	intergenic	21551	21858		intergenic_NZ_CP025085.1-nt00021551	-0.261917	1	1	0.586086	0.577309	0.971935	6.80221	0.356316	0.449054	1	SorTnSeq	+	intergenic_NZ_CP025085.1-nt00021551
NZ_CP025085.1	gene	21859	23565	type I restriction-modification system subunit M	gene-CWC46_RS00110	-0.0340706	1	1	-0.425531	0.299738	0.790627	8.31153	0.0232749	1	1	RefSeq	+	CWC46_RS00110	CWC46_RS00110				Gene				CWC46_00110	Protein Homology	CDS	Genbank:WP_021014229.1	CDS	COORDINATES: similar to AA sequence:RefSeq:WP_001480212.1
NZ_CP025085.1	gene	23555	24877	restriction endonuclease subunit S	gene-CWC46_RS00115	0.287779	0.159355	0.777028	0.191127	0.383337	0.874093	9.77281	-0.0115803	0.900373	1	RefSeq	+	CWC46_RS00115	CWC46_RS00115				Gene				CWC46_00115	Protein Homology	CDS	Genbank:WP_021014228.1	CDS	COORDINATES: similar to AA sequence:RefSeq:WP_014916364.1
NZ_CP025085.1	gene	24870	26057	DUF4268 domain-containing protein	gene-CWC46_RS00120	0.0155142	1	1	-0.693116	0.168646	0.676331	7.97527	0.251962	0.312985	1	RefSeq	+	CWC46_RS00120	CWC46_RS00120				Gene				CWC46_00120	Protein Homology	CDS	Genbank:WP_021014227.1	CDS	COORDINATES: similar to AA sequence:RefSeq:WP_000278725.1
NZ_CP025085.1	gene	26058	29192	type I restriction endonuclease subunit R	gene-CWC46_RS00125	-0.197611	0.495179	1	-0.0662416	0.941887	1	9.27206	0.255938	0.0658119	1	RefSeq	+	CWC46_RS00125	CWC46_RS00125				Gene				CWC46_00125	Protein Homology	CDS	Genbank:WP_021014226.1	CDS	COORDINATES: similar to AA sequence:RefSeq:WP_002438822.1
NZ_CP025085.1	intergenic	29193	29231		intergenic_NZ_CP025085.1-nt00029193											SorTnSeq	+	intergenic_NZ_CP025085.1-nt00029193
NZ_CP025085.1	gene	29232	31691	AAA family ATPase	gene-CWC46_RS00130	0.296297	0.0146654	0.388733	0.165202	0.164202	0.672426	11.1671	0.0045432	0.959377	1	RefSeq	+	CWC46_RS00130	CWC46_RS00130				Gene				CWC46_00130	Protein Homology	CDS	Genbank:WP_021014225.1	CDS	COORDINATES: similar to AA sequence:RefSeq:WP_001562495.1
NZ_CP025085.1	intergenic	31692	31797		intergenic_NZ_CP025085.1-nt00031692	-0.665438	0.753907	1	0.467794	0.607239	0.986286	6.11824	0.199877	0.855536	1	SorTnSeq	+	intergenic_NZ_CP025085.1-nt00031692
NZ_CP025085.1	gene	31798	32757	5'-nucleotidase	gene-CWC46_RS00135	-0.471757	0.451383	0.982097	-0.451402	0.461394	0.909605	7.40658	-0.0184798	1	1	RefSeq	+	CWC46_RS00135	CWC46_RS00135				Gene				CWC46_00135	Protein Homology	CDS	Genbank:WP_021014224.1	CDS	COORDINATES: similar to AA sequence:RefSeq:WP_000262388.1
NZ_CP025085.1	intergenic	32758	32842		intergenic_NZ_CP025085.1-nt00032758											SorTnSeq	+	intergenic_NZ_CP025085.1-nt00032758
NZ_CP025085.1	gene	32843	34102	integrase arm-type DNA-binding domain-containing protein	gene-CWC46_RS00140	-0.926105	0.143309	0.738339	-0.482022	0.440802	0.907018	7.29592	0.0220819	1	1	RefSeq	-	CWC46_RS00140	CWC46_RS00140				Gene				CWC46_00140	Protein Homology	CDS	Genbank:WP_021014223.1	CDS	COORDINATES: similar to AA sequence:RefSeq:WP_020456356.1
NZ_CP025085.1	intergenic	34103	34302		intergenic_NZ_CP025085.1-nt00034103	-1.45774	0.289063	0.895025	-0.677642	0.753907	1	5.91538	0.0391518	1	1	SorTnSeq	+	intergenic_NZ_CP025085.1-nt00034103
NZ_CP025085.1	gene	34303	34387	tRNA-Leu	gene-CWC46_RS00145											RefSeq	-	CWC46_RS00145	CWC46_RS00145				Gene				CWC46_00145	tRNAscan-SE	tRNA		tRNA	COORDINATES: profile:tRNAscan-SE:2.0.4
NZ_CP025085.1	intergenic	34388	34551		intergenic_NZ_CP025085.1-nt00034388											SorTnSeq	+	intergenic_NZ_CP025085.1-nt00034388
NZ_CP025085.1	gene	34552	35622	LPS export ABC transporter permease LptG	gene-CWC46_RS00150											RefSeq	-	lptG	CWC46_RS00150				Gene	lptG			CWC46_00150	Protein Homology	CDS	Genbank:WP_021014222.1	CDS	COORDINATES: similar to AA sequence:RefSeq:WP_004953051.1
NZ_CP025085.1	gene	35622	36722	LPS export ABC transporter permease LptF	gene-CWC46_RS00155											RefSeq	-	lptF	CWC46_RS00155				Gene	lptF			CWC46_00155	Protein Homology	CDS	Genbank:WP_021014221.1	CDS	COORDINATES: similar to AA sequence:RefSeq:WP_012822225.1
NZ_CP025085.1	intergenic	36723	37003		intergenic_NZ_CP025085.1-nt00036723	-0.00431774	1	1	-0.129088	1	1	6.07013	0.312194	0.711072	1	SorTnSeq	+	intergenic_NZ_CP025085.1-nt00036723
NZ_CP025085.1	gene	37004	38512	leucyl aminopeptidase	gene-CWC46_RS00160	-0.558304	0.331753	0.921205	0.620467	0.153917	0.648226	7.76492	0.124361	0.726881	1	RefSeq	+	pepA	CWC46_RS00160				Gene	pepA			CWC46_00160	Protein Homology	CDS	Genbank:WP_021014220.1	CDS	COORDINATES: similar to AA sequence:RefSeq:WP_007767120.1
NZ_CP025085.1	intergenic	38513	38723		intergenic_NZ_CP025085.1-nt00038513	0.174129	1	1	0.60114	0.726563	1	5.74209	0.450668	0.62906	1	SorTnSeq	+	intergenic_NZ_CP025085.1-nt00038513
NZ_CP025085.1	gene	38724	39173	DNA polymerase III subunit chi	gene-CWC46_RS00165											RefSeq	+	CWC46_RS00165	CWC46_RS00165				Gene				CWC46_00165	Protein Homology	CDS	Genbank:WP_021014219.1	CDS	COORDINATES: similar to AA sequence:RefSeq:WP_013316103.1
NZ_CP025085.1	intergenic	39174	39185		intergenic_NZ_CP025085.1-nt00039174											SorTnSeq	+	intergenic_NZ_CP025085.1-nt00039174
NZ_CP025085.1	gene	39186	42041	valine--tRNA ligase	gene-CWC46_RS00170											RefSeq	+	CWC46_RS00170	CWC46_RS00170				Gene				CWC46_00170	Protein Homology	CDS	Genbank:WP_021014218.1	CDS	COORDINATES: similar to AA sequence:RefSeq:WP_000416368.1
NZ_CP025085.1	intergenic	42042	42233		intergenic_NZ_CP025085.1-nt00042042											SorTnSeq	+	intergenic_NZ_CP025085.1-nt00042042
NZ_CP025085.1	gene	42234	43061	2%2C5-didehydrogluconate reductase DkgA	gene-CWC46_RS00175	-0.317906	0.831812	1	0.215712	0.850555	1	6.59692	-0.297749	0.560067	1	RefSeq	+	dkgA	CWC46_RS00175				Gene	dkgA			CWC46_00175	Protein Homology	CDS	Genbank:WP_021014217.1	CDS	COORDINATES: similar to AA sequence:RefSeq:WP_012822144.1
NZ_CP025085.1	intergenic	43062	43113		intergenic_NZ_CP025085.1-nt00043062											SorTnSeq	+	intergenic_NZ_CP025085.1-nt00043062
NZ_CP025085.1	gene	43114	43851	GntR family transcriptional regulator	gene-CWC46_RS00180	-0.00457578	1	1	-0.131264	1	1	6.31677	0.269465	0.747657	1	RefSeq	-	CWC46_RS00180	CWC46_RS00180				Gene				CWC46_00180	Protein Homology	CDS	Genbank:WP_021014216.1	CDS	COORDINATES: similar to AA sequence:RefSeq:WP_012822143.1
NZ_CP025085.1	intergenic	43852	44056		intergenic_NZ_CP025085.1-nt00043852											SorTnSeq	+	intergenic_NZ_CP025085.1-nt00043852
NZ_CP025085.1	gene	44057	45136	ADP-ribosylglycohydrolase family protein	gene-CWC46_RS00185	-0.0425094	0.866578	1	0.115942	0.877236	1	7.23183	0.280807	0.412241	1	RefSeq	+	CWC46_RS00185	CWC46_RS00185				Gene				CWC46_00185	Protein Homology	CDS	Genbank:WP_021014215.1	CDS	COORDINATES: similar to AA sequence:RefSeq:WP_015855261.1
NZ_CP025085.1	gene	45082	46503	permease for cytosine/purines uracil thiamine allantoin	gene-CWC46_RS00190	0.157179	1	1	-0.192198	0.671813	1	7.5004	0.0562888	0.924098	1	RefSeq	+	CWC46_RS00190	CWC46_RS00190				Gene				CWC46_00190	Protein Homology	CDS	Genbank:WP_021014214.1	CDS	COORDINATES: similar to AA sequence:RefSeq:WP_015855262.1
NZ_CP025085.1	gene	46500	47447	PfkB domain protein	gene-CWC46_RS00195	0.0404979	1	1	-1.05991	0.168639	0.676331	6.96877	0.287012	0.482793	1	RefSeq	+	CWC46_RS00195	CWC46_RS00195				Gene				CWC46_00195	Protein Homology	CDS	Genbank:WP_021014213.1	CDS	COORDINATES: similar to AA sequence:RefSeq:WP_009114697.1
NZ_CP025085.1	intergenic	47448	47498		intergenic_NZ_CP025085.1-nt00047448											SorTnSeq	+	intergenic_NZ_CP025085.1-nt00047448
NZ_CP025085.1	gene	47499	48143	maleylacetoacetate isomerase	gene-CWC46_RS00200	0.478668	0.81453	1	0.0955444	1	1	6.275	-0.263583	0.728334	1	RefSeq	-	maiA	CWC46_RS00200				Gene	maiA			CWC46_00200	Protein Homology	CDS	Genbank:WP_021014212.1	CDS	COORDINATES: similar to AA sequence:RefSeq:WP_009654002.1
NZ_CP025085.1	intergenic	48144	48165		intergenic_NZ_CP025085.1-nt00048144											SorTnSeq	+	intergenic_NZ_CP025085.1-nt00048144
NZ_CP025085.1	gene	48166	48867	fumarylacetoacetate hydrolase family protein	gene-CWC46_RS00205	-0.449518	0.647607	1	-0.576093	0.663625	1	6.39694	-0.314001	0.643971	1	RefSeq	-	CWC46_RS00205	CWC46_RS00205				Gene				CWC46_00205	Protein Homology	CDS	Genbank:WP_021014211.1	CDS	COORDINATES: similar to AA sequence:RefSeq:NP_311056.1
NZ_CP025085.1	intergenic	48868	48921		intergenic_NZ_CP025085.1-nt00048868											SorTnSeq	+	intergenic_NZ_CP025085.1-nt00048868
NZ_CP025085.1	gene	48922	49959	gentisate 1%2C2-dioxygenase	gene-CWC46_RS00210	0.512703	0.581055	1	-0.00967418	1	1	6.09438	0.514623	0.45826	1	RefSeq	-	gtdA	CWC46_RS00210				Gene	gtdA			CWC46_00210	Protein Homology	CDS	Genbank:WP_021014210.1	CDS	COORDINATES: similar to AA sequence:RefSeq:NP_461123.1
NZ_CP025085.1	intergenic	49960	49969		intergenic_NZ_CP025085.1-nt00049960											SorTnSeq	+	intergenic_NZ_CP025085.1-nt00049960
NZ_CP025085.1	gene	49970	51343	aromatic acid/H+ symport family MFS transporter	gene-CWC46_RS00215	-0.691274	0.39153	0.948327	0.381183	0.551487	0.954912	7.35733	0.459682	0.159075	1	RefSeq	-	CWC46_RS00215	CWC46_RS00215				Gene				CWC46_00215	Protein Homology	CDS	Genbank:WP_021014209.1	CDS	COORDINATES: similar to AA sequence:RefSeq:WP_006683816.1
NZ_CP025085.1	intergenic	51344	51487		intergenic_NZ_CP025085.1-nt00051344											SorTnSeq	+	intergenic_NZ_CP025085.1-nt00051344
NZ_CP025085.1	gene	51488	52411	LysR family transcriptional regulator	gene-CWC46_RS00220	0.326186	0.825664	1	-0.370962	0.632203	0.999559	6.49127	0.268687	0.560851	1	RefSeq	+	CWC46_RS00220	CWC46_RS00220				Gene				CWC46_00220	Protein Homology	CDS	Genbank:WP_021014208.1	CDS	COORDINATES: similar to AA sequence:RefSeq:WP_004852655.1
NZ_CP025085.1	intergenic	52412	52574		intergenic_NZ_CP025085.1-nt00052412											SorTnSeq	+	intergenic_NZ_CP025085.1-nt00052412
NZ_CP025085.1	gene	52575	53987	cell division protein FtsP	gene-CWC46_RS00225	-0.402087	0.790528	1	-4.81725	0.0214845	0.345743	6.27488	0.45323	0.348891	1	RefSeq	-	ftsP	CWC46_RS00225				Gene	ftsP			CWC46_00225	Protein Homology	CDS	Genbank:WP_021014207.1	CDS	COORDINATES: similar to AA sequence:RefSeq:WP_015855264.1
NZ_CP025085.1	intergenic	53988	54112		intergenic_NZ_CP025085.1-nt00053988											SorTnSeq	+	intergenic_NZ_CP025085.1-nt00053988
NZ_CP025085.1	gene	54113	54850	1-acylglycerol-3-phosphate O-acyltransferase	gene-CWC46_RS00230											RefSeq	-	CWC46_RS00230	CWC46_RS00230				Gene				CWC46_00230	Protein Homology	CDS	Genbank:WP_021014206.1	CDS	COORDINATES: similar to AA sequence:RefSeq:WP_015695868.1
NZ_CP025085.1	intergenic	54851	55036		intergenic_NZ_CP025085.1-nt00054851											SorTnSeq	+	intergenic_NZ_CP025085.1-nt00054851
NZ_CP025085.1	gene	55037	57310	DNA topoisomerase IV subunit A	gene-CWC46_RS00235											RefSeq	-	parC	CWC46_RS00235				Gene	parC			CWC46_00235	Protein Homology	CDS	Genbank:WP_021014205.1	CDS	COORDINATES: similar to AA sequence:RefSeq:WP_019453059.1
NZ_CP025085.1	intergenic	57311	57769		intergenic_NZ_CP025085.1-nt00057311	0.399531	0.163468	0.779723	0.601236	0.0127	0.288128	8.98566	-0.125589	0.458922	1	SorTnSeq	+	intergenic_NZ_CP025085.1-nt00057311
NZ_CP025085.1	gene	57770	59347	transcription antiterminator	gene-CWC46_RS00240	0.252734	0.059088	0.642244	0.183665	0.162062	0.668686	10.9355	0.0473472	0.544455	1	RefSeq	+	CWC46_RS00240	CWC46_RS00240				Gene				CWC46_00240	Protein Homology	CDS	Genbank:WP_021014204.1	CDS	COORDINATES: similar to AA sequence:RefSeq:WP_017801220.1
NZ_CP025085.1	intergenic	59348	59369		intergenic_NZ_CP025085.1-nt00059348	0.388013	0.753907	1	-1.18089	0.453125	0.907018	5.61378	-0.729522	0.454499	1	SorTnSeq	+	intergenic_NZ_CP025085.1-nt00059348
NZ_CP025085.1	gene	59370	59849	PTS transporter subunit EIIA	gene-CWC46_RS00245	0.40192	0.0745927	0.662174	0.662518	0.00123235	0.0886764	9.39017	0.0327303	0.844373	1	RefSeq	+	CWC46_RS00245	CWC46_RS00245				Gene				CWC46_00245	Protein Homology	CDS	Genbank:WP_021014203.1	CDS	COORDINATES: similar to AA sequence:RefSeq:WP_011091972.1
NZ_CP025085.1	intergenic	59850	59862		intergenic_NZ_CP025085.1-nt00059850	0.954203	0.266847	0.875598	0.120523	1	1	5.88798	-0.175536	0.823803	1	SorTnSeq	+	intergenic_NZ_CP025085.1-nt00059850
NZ_CP025085.1	gene	59863	60177	PTS fructose%2C IIB subunit	gene-CWC46_RS00250	0.650668	0.0279475	0.513765	0.616946	0.0248784	0.370747	8.63083	0.0268989	0.947898	1	RefSeq	+	CWC46_RS00250	CWC46_RS00250				Gene				CWC46_00250	Protein Homology	CDS	Genbank:WP_021014202.1	CDS	COORDINATES: similar to AA sequence:RefSeq:WP_009127717.1
NZ_CP025085.1	intergenic	60178	60202		intergenic_NZ_CP025085.1-nt00060178											SorTnSeq	+	intergenic_NZ_CP025085.1-nt00060178
NZ_CP025085.1	gene	60203	61294	PTS fructose transporter subunit IIC	gene-CWC46_RS00255	0.091224	0.853411	1	0.430673	0.12102	0.608972	8.59285	-0.074076	0.74697	1	RefSeq	+	CWC46_RS00255	CWC46_RS00255				Gene				CWC46_00255	Protein Homology	CDS	Genbank:WP_021014201.1	CDS	COORDINATES: similar to AA sequence:RefSeq:WP_005975565.1
NZ_CP025085.1	intergenic	61295	61306		intergenic_NZ_CP025085.1-nt00061295											SorTnSeq	+	intergenic_NZ_CP025085.1-nt00061295
NZ_CP025085.1	gene	61307	62158	class II fructose-bisphosphate aldolase family protein	gene-CWC46_RS00260	-0.00442277	1	1	-0.38781	0.67764	1	6.61375	-0.0120089	1	1	RefSeq	+	CWC46_RS00260	CWC46_RS00260				Gene				CWC46_00260	Protein Homology	CDS	Genbank:WP_021014200.1	CDS	COORDINATES: similar to AA sequence:RefSeq:WP_010280226.1
NZ_CP025085.1	intergenic	62159	62251		intergenic_NZ_CP025085.1-nt00062159											SorTnSeq	+	intergenic_NZ_CP025085.1-nt00062159
NZ_CP025085.1	gene	62252	63112	ketose-bisphosphate aldolase	gene-CWC46_RS00265	-0.131457	1	1	-1.23192	0.0871597	0.587715	7.14156	0.412927	0.197984	1	RefSeq	+	CWC46_RS00265	CWC46_RS00265				Gene				CWC46_00265	Protein Homology	CDS	Genbank:WP_021014199.1	CDS	COORDINATES: similar to AA sequence:RefSeq:WP_006687642.1
NZ_CP025085.1	intergenic	63113	63370		intergenic_NZ_CP025085.1-nt00063113	-0.953022	0.581055	1	-1.07572	0.581055	0.971935	6.20981	0.205998	0.742831	1	SorTnSeq	+	intergenic_NZ_CP025085.1-nt00063113
NZ_CP025085.1	gene	63371	63952	NAD(P)H-dependent oxidoreductase	gene-CWC46_RS00270	-0.00443897	1	1	-0.132798	1	1	6.81683	0.0542604	1	1	RefSeq	+	CWC46_RS00270	CWC46_RS00270				Gene				CWC46_00270	Protein Homology	CDS	Genbank:WP_021014198.1	CDS	COORDINATES: similar to AA sequence:RefSeq:WP_019843593.1
NZ_CP025085.1	intergenic	63953	63979		intergenic_NZ_CP025085.1-nt00063953											SorTnSeq	+	intergenic_NZ_CP025085.1-nt00063953
NZ_CP025085.1	gene	63980	64876	LysR family transcriptional regulator	gene-CWC46_RS00275	-1.10508	0.184935	0.805114	-0.665752	0.377088	0.868094	7.03284	0.210206	0.576435	1	RefSeq	-	CWC46_RS00275	CWC46_RS00275				Gene				CWC46_00275	Protein Homology	CDS	Genbank:WP_021014197.1	CDS	COORDINATES: similar to AA sequence:RefSeq:WP_014913891.1
NZ_CP025085.1	intergenic	64877	64883		intergenic_NZ_CP025085.1-nt00064877											SorTnSeq	+	intergenic_NZ_CP025085.1-nt00064877
NZ_CP025085.1	gene	64884	66779	DNA topoisomerase IV subunit B	gene-CWC46_RS00280											RefSeq	-	parE	CWC46_RS00280				Gene	parE			CWC46_00280	Protein Homology	CDS	Genbank:WP_021014196.1	CDS	COORDINATES: similar to AA sequence:RefSeq:WP_016943068.1
NZ_CP025085.1	intergenic	66780	66897		intergenic_NZ_CP025085.1-nt00066780											SorTnSeq	+	intergenic_NZ_CP025085.1-nt00066780
NZ_CP025085.1	gene	66898	67479	esterase YqiA	gene-CWC46_RS00285	-0.781943	0.332307	0.921205	-1.4558	0.210114	0.718687	6.43534	0.124025	0.882997	1	RefSeq	-	yqiA	CWC46_RS00285				Gene	yqiA			CWC46_00285	Protein Homology	CDS	Genbank:WP_021014195.1	CDS	COORDINATES: similar to AA sequence:RefSeq:WP_015855270.1
NZ_CP025085.1	gene	67479	68306	3'%2C5'-cyclic-AMP phosphodiesterase	gene-CWC46_RS00290											RefSeq	-	cpdA	CWC46_RS00290				Gene	cpdA			CWC46_00290	Protein Homology	CDS	Genbank:WP_021014194.1	CDS	COORDINATES: similar to AA sequence:RefSeq:WP_004958334.1
NZ_CP025085.1	intergenic	68307	68333		intergenic_NZ_CP025085.1-nt00068307											SorTnSeq	+	intergenic_NZ_CP025085.1-nt00068307
NZ_CP025085.1	gene	68334	68756	DUF1249 family protein	gene-CWC46_RS00295											RefSeq	-	CWC46_RS00295	CWC46_RS00295				Gene				CWC46_00295	Protein Homology	CDS	Genbank:WP_021014193.1	CDS	COORDINATES: similar to AA sequence:RefSeq:WP_012883074.1
NZ_CP025085.1	intergenic	68757	68760		intergenic_NZ_CP025085.1-nt00068757											SorTnSeq	+	intergenic_NZ_CP025085.1-nt00068757
NZ_CP025085.1	gene	68761	69393	ADP-ribose diphosphatase	gene-CWC46_RS00300	-1.57799	0.0962532	0.700618	-0.445321	0.83882	1	6.64684	0.17176	0.791368	1	RefSeq	-	nudF	CWC46_RS00300				Gene	nudF			CWC46_00300	Protein Homology	CDS	Genbank:WP_021014192.1	CDS	COORDINATES: similar to AA sequence:RefSeq:WP_015855273.1
NZ_CP025085.1	intergenic	69394	69766		intergenic_NZ_CP025085.1-nt00069394	-1.45773	0.507813	1	0.267395	1	1	6.02037	0.226795	0.850555	1	SorTnSeq	+	intergenic_NZ_CP025085.1-nt00069394
NZ_CP025085.1	gene	69767	71170	outer membrane channel protein TolC	gene-CWC46_RS00305											RefSeq	+	tolC	CWC46_RS00305				Gene	tolC			CWC46_00305	Protein Homology	CDS	Genbank:WP_021014191.1	CDS	COORDINATES: similar to AA sequence:RefSeq:WP_008103406.1
NZ_CP025085.1	intergenic	71171	71379		intergenic_NZ_CP025085.1-nt00071171	1.36702	0.0635688	0.644721	-1.57362	0.289063	0.782459	6.11824	0.226795	0.701109	1	SorTnSeq	+	intergenic_NZ_CP025085.1-nt00071171
NZ_CP025085.1	gene	71380	72036	DUF1190 family protein	gene-CWC46_RS00310	-1.56792	0.343751	0.928106	-0.239369	0.774414	1	6.02035	0.114479	1	1	RefSeq	+	CWC46_RS00310	CWC46_RS00310				Gene				CWC46_00310	Protein Homology	CDS	Genbank:WP_021014190.1	CDS	COORDINATES: similar to AA sequence:RefSeq:WP_012773030.1
NZ_CP025085.1	intergenic	72037	72047		intergenic_NZ_CP025085.1-nt00072037											SorTnSeq	+	intergenic_NZ_CP025085.1-nt00072037
NZ_CP025085.1	gene	72048	73208	glutathionylspermidine synthase family protein	gene-CWC46_RS00315	-1.5382	0.0556265	0.639208	-0.486618	0.494452	0.937974	6.81676	-0.4877	0.222376	1	RefSeq	+	CWC46_RS00315	CWC46_RS00315				Gene				CWC46_00315	Protein Homology	CDS	Genbank:WP_021014189.1	CDS	COORDINATES: similar to AA sequence:RefSeq:WP_015835650.1
NZ_CP025085.1	intergenic	73209	73246		intergenic_NZ_CP025085.1-nt00073209											SorTnSeq	+	intergenic_NZ_CP025085.1-nt00073209
NZ_CP025085.1	gene	73247	74029	4%2C5-DOPA dioxygenase extradiol	gene-CWC46_RS00320	-0.198258	1	1	0.338578	0.705192	1	6.61377	-0.00368948	1	1	RefSeq	-	ygiD	CWC46_RS00320				Gene	ygiD			CWC46_00320	Protein Homology	CDS	Genbank:WP_021014188.1	CDS	COORDINATES: similar to AA sequence:RefSeq:WP_004948311.1
NZ_CP025085.1	intergenic	74030	74255		intergenic_NZ_CP025085.1-nt00074030											SorTnSeq	+	intergenic_NZ_CP025085.1-nt00074030
NZ_CP025085.1	gene	74256	74634	RNase P RNA component class A	gene-CWC46_RS00325											RefSeq	-	rnpB	CWC46_RS00325				Gene	rnpB			CWC46_00325	cmsearch	RNase_P_RNA	RFAM:RF00010	ncRNA	COORDINATES: profile:INFERNAL:1.1.1
NZ_CP025085.1	intergenic	74635	74676		intergenic_NZ_CP025085.1-nt00074635											SorTnSeq	+	intergenic_NZ_CP025085.1-nt00074635
NZ_CP025085.1	gene	74677	75546	16S rRNA (cytidine(1402)-2'-O)-methyltransferase	gene-CWC46_RS00330	-1.63328	0.115319	0.716354	0.160405	0.850555	1	6.83127	0.434319	0.321088	1	RefSeq	-	rsmI	CWC46_RS00330				Gene	rsmI			CWC46_00330	Protein Homology	CDS	Genbank:WP_021014186.1	CDS	COORDINATES: similar to AA sequence:RefSeq:WP_015848090.1
NZ_CP025085.1	intergenic	75547	75605		intergenic_NZ_CP025085.1-nt00075547											SorTnSeq	+	intergenic_NZ_CP025085.1-nt00075547
NZ_CP025085.1	gene	75606	77639	penicillin-binding protein activator	gene-CWC46_RS00335	0.203973	0.75523	1	-1.038	0.0987385	0.603951	7.14162	0.0926937	0.826407	1	RefSeq	+	CWC46_RS00335	CWC46_RS00335				Gene				CWC46_00335	Protein Homology	CDS	Genbank:WP_021014185.1	CDS	COORDINATES: similar to AA sequence:RefSeq:WP_015848091.1
NZ_CP025085.1	gene	77597	77992	YraN family protein	gene-CWC46_RS00340											RefSeq	+	CWC46_RS00340	CWC46_RS00340				Gene				CWC46_00340	Protein Homology	CDS	Genbank:WP_037380509.1	CDS	COORDINATES: similar to AA sequence:RefSeq:WP_004958192.1
NZ_CP025085.1	intergenic	77993	78032		intergenic_NZ_CP025085.1-nt00077993											SorTnSeq	+	intergenic_NZ_CP025085.1-nt00077993
NZ_CP025085.1	gene	78033	78623	DnaA initiator-associating protein DiaA	gene-CWC46_RS00345											RefSeq	+	diaA	CWC46_RS00345				Gene	diaA			CWC46_00345	Protein Homology	CDS	Genbank:WP_021014183.1	CDS	COORDINATES: similar to AA sequence:RefSeq:WP_004391999.1
NZ_CP025085.1	intergenic	78624	78632		intergenic_NZ_CP025085.1-nt00078624											SorTnSeq	+	intergenic_NZ_CP025085.1-nt00078624
NZ_CP025085.1	gene	78633	79205	divisome-associated lipoprotein YraP	gene-CWC46_RS00350	-1.33288	0.210114	0.835947	-0.510767	0.647607	1	6.35737	-0.178919	0.877615	1	RefSeq	+	yraP	CWC46_RS00350				Gene	yraP			CWC46_00350	Protein Homology	CDS	Genbank:WP_021014182.1	CDS	COORDINATES: similar to AA sequence:RefSeq:WP_016943080.1
NZ_CP025085.1	intergenic	79206	79313		intergenic_NZ_CP025085.1-nt00079206											SorTnSeq	+	intergenic_NZ_CP025085.1-nt00079206
NZ_CP025085.1	gene	79314	80648	alginate lyase family protein	gene-CWC46_RS00355	-0.872501	0.281043	0.895025	-0.339086	0.73588	1	7.18735	0.360299	0.289102	1	RefSeq	-	CWC46_RS00355	CWC46_RS00355				Gene				CWC46_00355	Protein Homology	CDS	Genbank:WP_021014181.1	CDS	COORDINATES: similar to AA sequence:RefSeq:WP_013316037.1
NZ_CP025085.1	intergenic	80649	80705		intergenic_NZ_CP025085.1-nt00080649											SorTnSeq	+	intergenic_NZ_CP025085.1-nt00080649
NZ_CP025085.1	gene	80706	81437	monofunctional biosynthetic peptidoglycan transglycosylase	gene-CWC46_RS00360	0.167072	0.87463	1	0.275533	0.760793	1	7.25364	0.0863224	0.828425	1	RefSeq	-	mtgA	CWC46_RS00360				Gene	mtgA			CWC46_00360	Protein Homology	CDS	Genbank:WP_021014180.1	CDS	COORDINATES: similar to AA sequence:RefSeq:WP_012883062.1
NZ_CP025085.1	gene	81434	82087	isoprenoid biosynthesis glyoxalase ElbB	gene-CWC46_RS00365	-0.909701	0.359285	0.934991	-1.58362	0.143464	0.636147	6.59678	0.334173	0.418758	1	RefSeq	-	elbB	CWC46_RS00365				Gene	elbB			CWC46_00365	Protein Homology	CDS	Genbank:WP_037381098.1	CDS	COORDINATES: similar to AA sequence:RefSeq:WP_010280199.1
NZ_CP025085.1	intergenic	82088	82323		intergenic_NZ_CP025085.1-nt00082088											SorTnSeq	+	intergenic_NZ_CP025085.1-nt00082088
NZ_CP025085.1	gene	82324	84663	aerobic respiration two-component sensor histidine kinase ArcB	gene-CWC46_RS00370	-0.519541	0.254309	0.866683	-0.853563	0.0473951	0.469016	8.05149	-0.0383607	0.940613	1	RefSeq	-	arcB	CWC46_RS00370				Gene	arcB			CWC46_00370	Protein Homology	CDS	Genbank:WP_021014178.1	CDS	COORDINATES: similar to AA sequence:RefSeq:WP_019453121.1
NZ_CP025085.1	intergenic	84664	84763		intergenic_NZ_CP025085.1-nt00084664											SorTnSeq	+	intergenic_NZ_CP025085.1-nt00084664
NZ_CP025085.1	gene	84764	85693	TIGR01212 family radical SAM protein	gene-CWC46_RS00375	-0.442959	0.451383	0.982097	-0.163393	0.770868	1	7.53609	0.309707	0.307097	1	RefSeq	-	CWC46_RS00375	CWC46_RS00375				Gene				CWC46_00375	Protein Homology	CDS	Genbank:WP_021014177.1	CDS	COORDINATES: similar to AA sequence:RefSeq:WP_014913874.1	This family includes YhcC from E. coli K-12%2C an uncharacterized radical SAM protein.
NZ_CP025085.1	intergenic	85694	86372		intergenic_NZ_CP025085.1-nt00085694	-1.02166	0.24779	0.861321	0.139442	0.86794	1	7.04542	0.262794	0.494387	1	SorTnSeq	+	intergenic_NZ_CP025085.1-nt00085694
NZ_CP025085.1	gene	86373	90833	glutamate synthase large subunit	gene-CWC46_RS00380	-0.230622	0.367432	0.943534	-0.361396	0.147134	0.640548	9.34718	-0.0929504	0.54096	1	RefSeq	+	gltB	CWC46_RS00380				Gene	gltB			CWC46_00380	Protein Homology	CDS	Genbank:WP_021014176.1	CDS	COORDINATES: similar to AA sequence:RefSeq:YP_005229064.1
NZ_CP025085.1	intergenic	90834	90842		intergenic_NZ_CP025085.1-nt00090834											SorTnSeq	+	intergenic_NZ_CP025085.1-nt00090834
NZ_CP025085.1	gene	90843	92261	FAD-dependent oxidoreductase	gene-CWC46_RS00385	-0.410642	0.711072	1	-1.50135	0.0639155	0.526908	6.95558	0.27458	0.422196	1	RefSeq	+	CWC46_RS00385	CWC46_RS00385				Gene				CWC46_00385	Protein Homology	CDS	Genbank:WP_021014175.1	CDS	COORDINATES: similar to AA sequence:RefSeq:WP_001540975.1
NZ_CP025085.1	intergenic	92262	92345		intergenic_NZ_CP025085.1-nt00092262											SorTnSeq	+	intergenic_NZ_CP025085.1-nt00092262
NZ_CP025085.1	gene	92346	92756	GFA family protein	gene-CWC46_RS00390	-0.909701	0.359285	0.934991	-1.03507	0.359285	0.847909	6.33719	-0.526019	0.26819	1	RefSeq	-	CWC46_RS00390	CWC46_RS00390				Gene				CWC46_00390	Protein Homology	CDS	Genbank:WP_021014174.1	CDS	COORDINATES: similar to AA sequence:RefSeq:WP_012883056.1
NZ_CP025085.1	intergenic	92757	92883		intergenic_NZ_CP025085.1-nt00092757											SorTnSeq	+	intergenic_NZ_CP025085.1-nt00092757
NZ_CP025085.1	gene	92884	93375	ClpXP protease specificity-enhancing factor	gene-CWC46_RS00395											RefSeq	-	sspB	CWC46_RS00395				Gene	sspB			CWC46_00395	Protein Homology	CDS	Genbank:WP_021014173.1	CDS	COORDINATES: similar to AA sequence:RefSeq:NP_312128.1
NZ_CP025085.1	intergenic	93376	93380		intergenic_NZ_CP025085.1-nt00093376											SorTnSeq	+	intergenic_NZ_CP025085.1-nt00093376
NZ_CP025085.1	gene	93381	94022	stringent starvation protein A	gene-CWC46_RS00400											RefSeq	-	sspA	CWC46_RS00400				Gene	sspA			CWC46_00400	Protein Homology	CDS	Genbank:WP_021014172.1	CDS	COORDINATES: similar to AA sequence:RefSeq:WP_005162411.1
NZ_CP025085.1	intergenic	94023	94349		intergenic_NZ_CP025085.1-nt00094023											SorTnSeq	+	intergenic_NZ_CP025085.1-nt00094023
NZ_CP025085.1	gene	94350	94742	30S ribosomal protein S9	gene-CWC46_RS00405											RefSeq	-	rpsI	CWC46_RS00405				Gene	rpsI			CWC46_00405	Protein Homology	CDS	Genbank:WP_021014171.1	CDS	COORDINATES: similar to AA sequence:RefSeq:WP_000829824.1
NZ_CP025085.1	intergenic	94743	94757		intergenic_NZ_CP025085.1-nt00094743											SorTnSeq	+	intergenic_NZ_CP025085.1-nt00094743
NZ_CP025085.1	gene	94758	95186	50S ribosomal protein L13	gene-CWC46_RS00410											RefSeq	-	rplM	CWC46_RS00410				Gene	rplM			CWC46_00410	Protein Homology	CDS	Genbank:WP_021014170.1	CDS	COORDINATES: similar to AA sequence:RefSeq:WP_010847760.1
NZ_CP025085.1	intergenic	95187	95234		intergenic_NZ_CP025085.1-nt00095187											SorTnSeq	+	intergenic_NZ_CP025085.1-nt00095187
NZ_CP025085.1	pseudogene	95235	95432	hypothetical protein	gene-CWC46_RS22985											RefSeq	-	CWC46_RS22985	CWC46_RS22985			pseudo	Gene				CWC46_00415	Protein Homology	CDS		CDS	COORDINATES: similar to AA sequence:RefSeq:WP_013577240.1	frameshifted%3B internal stop
NZ_CP025085.1	intergenic	95433	95445		intergenic_NZ_CP025085.1-nt00095433											SorTnSeq	+	intergenic_NZ_CP025085.1-nt00095433
NZ_CP025085.1	gene	95446	96573	cell division protein ZapE	gene-CWC46_RS00420	-0.691273	0.39153	0.948327	-0.602446	0.405034	0.880775	7.26414	0.411906	0.184291	1	RefSeq	-	CWC46_RS00420	CWC46_RS00420				Gene				CWC46_00420	Protein Homology	CDS	Genbank:WP_021014169.1	CDS	COORDINATES: similar to AA sequence:RefSeq:WP_001192332.1
NZ_CP025085.1	intergenic	96574	96794		intergenic_NZ_CP025085.1-nt00096574	-0.847236	0.480683	0.99597	0.20705	0.83882	1	6.52733	0.00227878	1	1	SorTnSeq	+	intergenic_NZ_CP025085.1-nt00096574
NZ_CP025085.1	gene	96795	97199	DUF1043 family protein	gene-CWC46_RS00425	0.323387	0.823803	1	-1.31555	0.301759	0.790627	6.43539	0.210205	0.760793	1	RefSeq	+	CWC46_RS00425	CWC46_RS00425				Gene				CWC46_00425	Protein Homology	CDS	Genbank:WP_021014168.1	CDS	COORDINATES: similar to AA sequence:RefSeq:WP_005975485.1
NZ_CP025085.1	intergenic	97200	97411		intergenic_NZ_CP025085.1-nt00097200	0.387782	1	1	-0.285149	0.72686	1	5.85993	0.336824	0.832313	1	SorTnSeq	+	intergenic_NZ_CP025085.1-nt00097200
NZ_CP025085.1	gene	97412	98782	serine endoprotease DegQ	gene-CWC46_RS00430	-0.739392	0.26819	0.875598	-1.34044	0.0200744	0.343928	7.29587	0.0443347	0.921192	1	RefSeq	+	degQ	CWC46_RS00430				Gene	degQ			CWC46_00430	Protein Homology	CDS	Genbank:WP_021014167.1	CDS	COORDINATES: similar to AA sequence:RefSeq:WP_010296670.1
NZ_CP025085.1	intergenic	98783	98869		intergenic_NZ_CP025085.1-nt00098783											SorTnSeq	+	intergenic_NZ_CP025085.1-nt00098783
NZ_CP025085.1	gene	98870	99931	outer membrane-stress sensor serine endopeptidase DegS	gene-CWC46_RS00435	0.0561489	1	1	0.146291	0.779769	1	7.35746	-0.119756	0.757192	1	RefSeq	+	degS	CWC46_RS00435				Gene	degS			CWC46_00435	Protein Homology	CDS	Genbank:WP_021014166.1	CDS	COORDINATES: similar to AA sequence:RefSeq:WP_009114741.1
NZ_CP025085.1	intergenic	99932	100006		intergenic_NZ_CP025085.1-nt00099932											SorTnSeq	+	intergenic_NZ_CP025085.1-nt00099932
NZ_CP025085.1	gene	100007	101269	UDP-N-acetylglucosamine 1-carboxyvinyltransferase	gene-CWC46_RS00440											RefSeq	-	murA	CWC46_RS00440				Gene	murA			CWC46_00440	Protein Homology	CDS	Genbank:WP_021014165.1	CDS	COORDINATES: similar to AA sequence:RefSeq:WP_014729755.1
NZ_CP025085.1	intergenic	101270	101322		intergenic_NZ_CP025085.1-nt00101270											SorTnSeq	+	intergenic_NZ_CP025085.1-nt00101270
NZ_CP025085.1	gene	101323	101577	BolA family iron metabolism protein IbaG	gene-CWC46_RS00445											RefSeq	-	ibaG	CWC46_RS00445				Gene	ibaG			CWC46_00445	Protein Homology	CDS	Genbank:WP_021014164.1	CDS	COORDINATES: similar to AA sequence:RefSeq:WP_015585657.1
NZ_CP025085.1	intergenic	101578	101708		intergenic_NZ_CP025085.1-nt00101578											SorTnSeq	+	intergenic_NZ_CP025085.1-nt00101578
NZ_CP025085.1	gene	101709	102014	lipid asymmetry maintenance protein MlaB	gene-CWC46_RS00450	0.24505	1	1	-4.16956	0.125	0.608972	5.83134	0.190155	1	1	RefSeq	-	mlaB	CWC46_RS00450				Gene	mlaB			CWC46_00450	Protein Homology	CDS	Genbank:WP_021014163.1	CDS	COORDINATES: similar to AA sequence:RefSeq:WP_002210125.1
NZ_CP025085.1	gene	102007	102642	phospholipid-binding protein MlaC	gene-CWC46_RS00455	-0.629342	0.523468	1	-2.59702	0.0308842	0.414836	6.50934	-0.12371	0.887726	1	RefSeq	-	mlaC	CWC46_RS00455				Gene	mlaC			CWC46_00455	Protein Homology	CDS	Genbank:WP_021014162.1	CDS	COORDINATES: similar to AA sequence:RefSeq:WP_012883044.1
NZ_CP025085.1	intergenic	102643	102654		intergenic_NZ_CP025085.1-nt00102643											SorTnSeq	+	intergenic_NZ_CP025085.1-nt00102643
NZ_CP025085.1	gene	102655	103209	outer membrane lipid asymmetry maintenance protein MlaD	gene-CWC46_RS00460	0.283214	1	1	-0.787922	0.548829	0.954912	5.99485	-0.177011	0.84502	1	RefSeq	-	mlaD	CWC46_RS00460				Gene	mlaD			CWC46_00460	Protein Homology	CDS	Genbank:WP_021014161.1	CDS	COORDINATES: similar to AA sequence:RefSeq:WP_004714942.1
NZ_CP025085.1	intergenic	103210	103213		intergenic_NZ_CP025085.1-nt00103210											SorTnSeq	+	intergenic_NZ_CP025085.1-nt00103210
NZ_CP025085.1	gene	103214	103996	lipid asymmetry maintenance ABC transporter permease subunit MlaE	gene-CWC46_RS00465	-0.00443832	1	1	-0.132798	1	1	6.95564	0.432122	0.281983	1	RefSeq	-	mlaE	CWC46_RS00465				Gene	mlaE			CWC46_00465	Protein Homology	CDS	Genbank:WP_021014160.1	CDS	COORDINATES: similar to AA sequence:RefSeq:WP_013507665.1
NZ_CP025085.1	intergenic	103997	104003		intergenic_NZ_CP025085.1-nt00103997											SorTnSeq	+	intergenic_NZ_CP025085.1-nt00103997
NZ_CP025085.1	gene	104004	104816	phospholipid ABC transporter ATP-binding protein MlaF	gene-CWC46_RS00470	-0.410642	0.711072	1	0.0335904	1	1	6.95567	0.0651188	0.904975	1	RefSeq	-	mlaF	CWC46_RS00470				Gene	mlaF			CWC46_00470	Protein Homology	CDS	Genbank:WP_021014159.1	CDS	COORDINATES: similar to AA sequence:RefSeq:WP_013316013.1
NZ_CP025085.1	intergenic	104817	105100		intergenic_NZ_CP025085.1-nt00104817	-4.27388	0.125	0.716354	-4.29976	0.125	0.608972	5.91535	0.514623	0.45826	1	SorTnSeq	+	intergenic_NZ_CP025085.1-nt00104817
NZ_CP025085.1	gene	105101	106063	calcium/sodium antiporter	gene-CWC46_RS00475	-0.0044728	1	1	-0.269264	0.760793	1	7.42581	0.310426	0.329144	1	RefSeq	+	CWC46_RS00475	CWC46_RS00475				Gene				CWC46_00475	Protein Homology	CDS	Genbank:WP_021014158.1	CDS	COORDINATES: similar to AA sequence:RefSeq:WP_015855305.1
NZ_CP025085.1	intergenic	106064	106095		intergenic_NZ_CP025085.1-nt00106064											SorTnSeq	+	intergenic_NZ_CP025085.1-nt00106064
NZ_CP025085.1	gene	106096	107082	arabinose-5-phosphate isomerase KdsD	gene-CWC46_RS00480											RefSeq	+	kdsD	CWC46_RS00480				Gene	kdsD			CWC46_00480	Protein Homology	CDS	Genbank:WP_021014157.1	CDS	COORDINATES: similar to AA sequence:RefSeq:WP_009114750.1
NZ_CP025085.1	intergenic	107083	107149		intergenic_NZ_CP025085.1-nt00107083											SorTnSeq	+	intergenic_NZ_CP025085.1-nt00107083
NZ_CP025085.1	gene	107150	107716	3-deoxy-manno-octulosonate-8-phosphatase KdsC	gene-CWC46_RS00485											RefSeq	+	kdsC	CWC46_RS00485				Gene	kdsC			CWC46_00485	Protein Homology	CDS	Genbank:WP_021014156.1	CDS	COORDINATES: similar to AA sequence:RefSeq:WP_012990130.1
NZ_CP025085.1	gene	107713	108282	LPS export ABC transporter periplasmic protein LptC	gene-CWC46_RS00490											RefSeq	+	lptC	CWC46_RS00490				Gene	lptC			CWC46_00490	Protein Homology	CDS	Genbank:WP_021014155.1	CDS	COORDINATES: similar to AA sequence:RefSeq:WP_012772998.1
NZ_CP025085.1	gene	108260	108838	lipopolysaccharide ABC transporter substrate-binding protein LptA	gene-CWC46_RS00495											RefSeq	+	lptA	CWC46_RS00495				Gene	lptA			CWC46_00495	Protein Homology	CDS	Genbank:WP_021014154.1	CDS	COORDINATES: similar to AA sequence:RefSeq:WP_005975458.1
NZ_CP025085.1	intergenic	108839	108841		intergenic_NZ_CP025085.1-nt00108839											SorTnSeq	+	intergenic_NZ_CP025085.1-nt00108839
NZ_CP025085.1	gene	108842	109567	LPS export ABC transporter ATP-binding protein	gene-CWC46_RS00500											RefSeq	+	lptB	CWC46_RS00500				Gene	lptB			CWC46_00500	Protein Homology	CDS	Genbank:WP_021014153.1	CDS	COORDINATES: similar to AA sequence:RefSeq:WP_004091254.1
NZ_CP025085.1	intergenic	109568	109608		intergenic_NZ_CP025085.1-nt00109568											SorTnSeq	+	intergenic_NZ_CP025085.1-nt00109568
NZ_CP025085.1	gene	109609	111042	RNA polymerase factor sigma-54	gene-CWC46_RS00505	-4.79095	0.0214845	0.452793	0.43548	0.647607	1	6.18748	-0.0119224	1	1	RefSeq	+	rpoN	CWC46_RS00505				Gene	rpoN			CWC46_00505	Protein Homology	CDS	Genbank:WP_021014152.1	CDS	COORDINATES: similar to AA sequence:RefSeq:WP_002210115.1
NZ_CP025085.1	intergenic	111043	111065		intergenic_NZ_CP025085.1-nt00111043											SorTnSeq	+	intergenic_NZ_CP025085.1-nt00111043
NZ_CP025085.1	gene	111066	111353	ribosome hibernation promoting factor	gene-CWC46_RS00510											RefSeq	+	hpf	CWC46_RS00510				Gene	hpf			CWC46_00510	Protein Homology	CDS	Genbank:WP_021014151.1	CDS	COORDINATES: similar to AA sequence:RefSeq:WP_005975449.1
NZ_CP025085.1	intergenic	111354	111451		intergenic_NZ_CP025085.1-nt00111354											SorTnSeq	+	intergenic_NZ_CP025085.1-nt00111354
NZ_CP025085.1	gene	111452	111925	PTS IIA-like nitrogen regulatory protein PtsN	gene-CWC46_RS00515											RefSeq	+	ptsN	CWC46_RS00515				Gene	ptsN			CWC46_00515	Protein Homology	CDS	Genbank:WP_037381095.1	CDS	COORDINATES: similar to AA sequence:RefSeq:WP_011091919.1
NZ_CP025085.1	intergenic	111926	112118		intergenic_NZ_CP025085.1-nt00111926											SorTnSeq	+	intergenic_NZ_CP025085.1-nt00111926
NZ_CP025085.1	gene	112119	112973	RNase adapter RapZ	gene-CWC46_RS00520											RefSeq	+	rapZ	CWC46_RS00520				Gene	rapZ			CWC46_00520	Protein Homology	CDS	Genbank:WP_021014149.1	CDS	COORDINATES: similar to AA sequence:RefSeq:WP_005121329.1
NZ_CP025085.1	gene	112970	113242	PTS phosphocarrier protein NPr	gene-CWC46_RS00525											RefSeq	+	npr	CWC46_RS00525				Gene	npr			CWC46_00525	Protein Homology	CDS	Genbank:WP_021014148.1	CDS	COORDINATES: similar to AA sequence:RefSeq:WP_013024319.1
NZ_CP025085.1	intergenic	113243	113416		intergenic_NZ_CP025085.1-nt00113243											SorTnSeq	+	intergenic_NZ_CP025085.1-nt00113243
NZ_CP025085.1	gene	113417	113827	nucleoside diphosphate kinase regulator	gene-CWC46_RS00530	-4.14466	0.220255	0.835947	-0.427256	1	1	5.74205	-0.0453335	1	1	RefSeq	+	rnk	CWC46_RS00530				Gene	rnk			CWC46_00530	Protein Homology	CDS	Genbank:WP_021014147.1	CDS	COORDINATES: similar to AA sequence:RefSeq:WP_015962025.1
NZ_CP025085.1	intergenic	113828	113891		intergenic_NZ_CP025085.1-nt00113828											SorTnSeq	+	intergenic_NZ_CP025085.1-nt00113828
NZ_CP025085.1	gene	113892	115232	metalloprotease PmbA	gene-CWC46_RS00535	-0.767446	0.551229	1	-0.341355	0.775852	1	6.11818	0.175797	0.862393	1	RefSeq	-	pmbA	CWC46_RS00535				Gene	pmbA			CWC46_00535	Protein Homology	CDS	Genbank:WP_021014146.1	CDS	COORDINATES: similar to AA sequence:RefSeq:WP_015848127.1
NZ_CP025085.1	intergenic	115233	115421		intergenic_NZ_CP025085.1-nt00115233	-0.52481	1	1	-3.48508	0.25	0.761797	5.31677	-0.71212	0.753907	1	SorTnSeq	+	intergenic_NZ_CP025085.1-nt00115233
NZ_CP025085.1	gene	115422	115976	ribosome-associated protein	gene-CWC46_RS00540	0.512703	0.774414	1	-0.558228	0.753907	1	5.85993	-0.308581	0.823803	1	RefSeq	+	CWC46_RS00540	CWC46_RS00540				Gene				CWC46_00540	Protein Homology	CDS	Genbank:WP_021014145.1	CDS	COORDINATES: similar to AA sequence:RefSeq:WP_013814696.1
NZ_CP025085.1	intergenic	115977	116066		intergenic_NZ_CP025085.1-nt00115977											SorTnSeq	+	intergenic_NZ_CP025085.1-nt00115977
NZ_CP025085.1	gene	116067	117071	tryptophan--tRNA ligase	gene-CWC46_RS00545											RefSeq	-	trpS	CWC46_RS00545				Gene	trpS			CWC46_00545	Protein Homology	CDS	Genbank:WP_021014144.1	CDS	COORDINATES: similar to AA sequence:RefSeq:YP_005229207.1
NZ_CP025085.1	gene	117068	117772	phosphoglycolate phosphatase	gene-CWC46_RS00550											RefSeq	-	CWC46_RS00550	CWC46_RS00550				Gene				CWC46_00550	Protein Homology	CDS	Genbank:WP_021014143.1	CDS	COORDINATES: similar to AA sequence:RefSeq:WP_014701666.1
NZ_CP025085.1	gene	117765	118442	ribulose-phosphate 3-epimerase	gene-CWC46_RS00555											RefSeq	-	rpe	CWC46_RS00555				Gene	rpe			CWC46_00555	Protein Homology	CDS	Genbank:WP_021014142.1	CDS	COORDINATES: similar to AA sequence:RefSeq:WP_014333544.1
NZ_CP025085.1	intergenic	118443	118573		intergenic_NZ_CP025085.1-nt00118443											SorTnSeq	+	intergenic_NZ_CP025085.1-nt00118443
NZ_CP025085.1	gene	118574	119389	adenine-specific DNA-methyltransferase	gene-CWC46_RS00560											RefSeq	-	dam	CWC46_RS00560				Gene	dam			CWC46_00560	Protein Homology	CDS	Genbank:WP_021014141.1	CDS	COORDINATES: similar to AA sequence:RefSeq:WP_015962195.1
NZ_CP025085.1	intergenic	119390	119467		intergenic_NZ_CP025085.1-nt00119390											SorTnSeq	+	intergenic_NZ_CP025085.1-nt00119390
NZ_CP025085.1	gene	119468	120472	SPOR domain-containing protein	gene-CWC46_RS00565											RefSeq	-	CWC46_RS00565	CWC46_RS00565				Gene				CWC46_00565	Protein Homology	CDS	Genbank:WP_021014140.1	CDS	COORDINATES: similar to AA sequence:RefSeq:WP_011095565.1
NZ_CP025085.1	intergenic	120473	120607		intergenic_NZ_CP025085.1-nt00120473											SorTnSeq	+	intergenic_NZ_CP025085.1-nt00120473
NZ_CP025085.1	gene	120608	121693	3-dehydroquinate synthase	gene-CWC46_RS00570											RefSeq	-	aroB	CWC46_RS00570				Gene	aroB			CWC46_00570	Protein Homology	CDS	Genbank:WP_021014139.1	CDS	COORDINATES: similar to AA sequence:RefSeq:WP_019845155.1
NZ_CP025085.1	intergenic	121694	121745		intergenic_NZ_CP025085.1-nt00121694											SorTnSeq	+	intergenic_NZ_CP025085.1-nt00121694
NZ_CP025085.1	gene	121746	122267	shikimate kinase AroK	gene-CWC46_RS00575											RefSeq	-	aroK	CWC46_RS00575				Gene	aroK			CWC46_00575	Protein Homology	CDS	Genbank:WP_021014138.1	CDS	COORDINATES: similar to AA sequence:RefSeq:WP_004709337.1
NZ_CP025085.1	intergenic	122268	122571		intergenic_NZ_CP025085.1-nt00122268											SorTnSeq	+	intergenic_NZ_CP025085.1-nt00122268
NZ_CP025085.1	gene	122572	123879	DNA uptake porin HofQ	gene-CWC46_RS00585	0.255693	0.583135	1	-0.451402	0.560067	0.960197	7.56249	0.238579	0.403477	1	RefSeq	-	hofQ	CWC46_RS00585				Gene	hofQ			CWC46_00585	Protein Homology	CDS	Genbank:WP_084297621.1	CDS	COORDINATES: similar to AA sequence:RefSeq:WP_005969445.1
NZ_CP025085.1	intergenic	123880	123907		intergenic_NZ_CP025085.1-nt00123880											SorTnSeq	+	intergenic_NZ_CP025085.1-nt00123880
NZ_CP025085.1	gene	123908	124282	DUF2531 family protein	gene-CWC46_RS00590	-0.312449	0.790528	1	-0.98602	0.581055	0.971935	6.25353	0.425947	0.511378	1	RefSeq	-	CWC46_RS00590	CWC46_RS00590				Gene				CWC46_00590	Protein Homology	CDS	Genbank:WP_021014136.1	CDS	COORDINATES: protein motif:HMM:NF022208.1
NZ_CP025085.1	gene	124279	124818	hypothetical protein	gene-CWC46_RS00595	-1.46064	0.143464	0.738339	-1.03507	0.237886	0.745168	6.39689	-0.242206	0.765993	1	RefSeq	-	CWC46_RS00595	CWC46_RS00595				Gene				CWC46_00595	GeneMarkS-2+	CDS	Genbank:WP_021014135.1	CDS	COORDINATES: ab initio prediction:GeneMarkS-2+
NZ_CP025085.1	gene	124815	125378	PilN domain-containing protein	gene-CWC46_RS00600	0.183206	1	1	0.0553986	1	1	6.69527	0.505913	0.280613	1	RefSeq	-	CWC46_RS00600	CWC46_RS00600				Gene				CWC46_00600	Protein Homology	CDS	Genbank:WP_021014134.1	CDS	COORDINATES: protein motif:HMM:NF016992.1
NZ_CP025085.1	gene	125378	126232	pilus assembly protein PilM	gene-CWC46_RS00605	-1.15081	0.0895325	0.694008	-1.58918	0.0409605	0.438943	7.26412	0.157761	0.69083	1	RefSeq	-	CWC46_RS00605	CWC46_RS00605				Gene				CWC46_00605	Protein Homology	CDS	Genbank:WP_021014133.1	CDS	COORDINATES: similar to AA sequence:RefSeq:WP_016942950.1
NZ_CP025085.1	intergenic	126233	126349		intergenic_NZ_CP025085.1-nt00126233											SorTnSeq	+	intergenic_NZ_CP025085.1-nt00126233
NZ_CP025085.1	gene	126350	128908	peptidoglycan glycosyltransferase/peptidoglycan DD-transpeptidase MrcA	gene-CWC46_RS00610	-2.53576	0.012726	0.358559	-1.20779	0.189248	0.692764	6.72649	0.398158	0.381737	1	RefSeq	+	mrcA	CWC46_RS00610				Gene	mrcA			CWC46_00610	Protein Homology	CDS	Genbank:WP_021014132.1	CDS	COORDINATES: similar to AA sequence:RefSeq:WP_012147287.1
NZ_CP025085.1	intergenic	128909	128978		intergenic_NZ_CP025085.1-nt00128909											SorTnSeq	+	intergenic_NZ_CP025085.1-nt00128909
NZ_CP025085.1	gene	128979	129530	ADP compounds hydrolase NudE	gene-CWC46_RS00615	-0.271366	0.690039	1	-1.36203	0.151591	0.645993	6.67929	-0.229716	0.596645	1	RefSeq	-	nudE	CWC46_RS00615				Gene	nudE			CWC46_00615	Protein Homology	CDS	Genbank:WP_037380504.1	CDS	COORDINATES: similar to AA sequence:RefSeq:WP_019845148.1
NZ_CP025085.1	intergenic	129531	129963		intergenic_NZ_CP025085.1-nt00129531	-0.107316	1	1	0.751943	0.081429	0.564956	7.36751	-0.0232206	1	1	SorTnSeq	+	intergenic_NZ_CP025085.1-nt00129531
NZ_CP025085.1	gene	129964	132093	intracellular growth attenuator family protein	gene-CWC46_RS00620	-0.873148	0.104126	0.716354	1.59086	0.00011607	0.0162401	7.44502	0.409177	0.273803	1	RefSeq	+	CWC46_RS00620	CWC46_RS00620				Gene				CWC46_00620	Protein Homology	CDS	Genbank:WP_021014130.1	CDS	COORDINATES: similar to AA sequence:RefSeq:WP_012886413.1
NZ_CP025085.1	intergenic	132094	132204		intergenic_NZ_CP025085.1-nt00132094											SorTnSeq	+	intergenic_NZ_CP025085.1-nt00132094
NZ_CP025085.1	gene	132205	132906	GMP/IMP nucleotidase	gene-CWC46_RS00625	-0.051792	0.857806	1	-0.368276	0.590637	0.978953	6.95567	-0.0162682	1	1	RefSeq	+	yrfG	CWC46_RS00625				Gene	yrfG			CWC46_00625	Protein Homology	CDS	Genbank:WP_021014129.1	CDS	COORDINATES: similar to AA sequence:RefSeq:WP_009111152.1
NZ_CP025085.1	gene	132903	133316	ribosome-associated heat shock protein Hsp15	gene-CWC46_RS00630	-0.847236	0.480683	0.99597	-0.576093	0.663625	1	6.50937	0.111632	0.775451	1	RefSeq	+	hslR	CWC46_RS00630				Gene	hslR			CWC46_00630	Protein Homology	CDS	Genbank:WP_021014128.1	CDS	COORDINATES: similar to AA sequence:RefSeq:WP_010277707.1
NZ_CP025085.1	intergenic	133317	133341		intergenic_NZ_CP025085.1-nt00133317											SorTnSeq	+	intergenic_NZ_CP025085.1-nt00133317
NZ_CP025085.1	gene	133342	134214	Hsp33 family molecular chaperone HslO	gene-CWC46_RS00635	-0.366742	0.577309	1	0.227954	0.740569	1	6.96884	0.145146	0.816525	1	RefSeq	+	hslO	CWC46_RS00635				Gene	hslO			CWC46_00635	Protein Homology	CDS	Genbank:WP_021014127.1	CDS	COORDINATES: similar to AA sequence:RefSeq:WP_011095578.1
NZ_CP025085.1	intergenic	134215	134418		intergenic_NZ_CP025085.1-nt00134215											SorTnSeq	+	intergenic_NZ_CP025085.1-nt00134215
NZ_CP025085.1	gene	134419	136038	phosphoenolpyruvate carboxykinase (ATP)	gene-CWC46_RS00640	-0.855803	0.164152	0.78003	-0.000785065	1	1	7.5183	0.166748	0.576018	1	RefSeq	+	pckA	CWC46_RS00640				Gene	pckA			CWC46_00640	Protein Homology	CDS	Genbank:WP_021014126.1	CDS	COORDINATES: similar to AA sequence:RefSeq:WP_013814844.1
NZ_CP025085.1	intergenic	136039	136159		intergenic_NZ_CP025085.1-nt00136039											SorTnSeq	+	intergenic_NZ_CP025085.1-nt00136039
NZ_CP025085.1	gene	136160	137530	two-component system sensor histidine kinase EnvZ	gene-CWC46_RS00645	-1.8555	0.226563	0.835947	-4.81725	0.0214845	0.345743	6.14161	0.205998	0.742831	1	RefSeq	-	envZ	CWC46_RS00645				Gene	envZ			CWC46_00645	Protein Homology	CDS	Genbank:WP_021014125.1	CDS	COORDINATES: similar to AA sequence:RefSeq:WP_013319771.1
NZ_CP025085.1	gene	137527	138252	two-component system response regulator OmpR	gene-CWC46_RS00650											RefSeq	-	ompR	CWC46_RS00650				Gene	ompR			CWC46_00650	Protein Homology	CDS	Genbank:WP_157831392.1	CDS	COORDINATES: similar to AA sequence:RefSeq:WP_020166624.1
NZ_CP025085.1	intergenic	138253	138611		intergenic_NZ_CP025085.1-nt00138253	0.616284	0.383312	0.948327	-0.691396	0.454499	0.907018	6.35744	-0.0295246	1	1	SorTnSeq	+	intergenic_NZ_CP025085.1-nt00138253
NZ_CP025085.1	gene	138612	139094	transcription elongation factor GreB	gene-CWC46_RS00655	-0.641763	0.301759	0.900099	-0.37051	0.81453	1	6.35739	0.0288658	1	1	RefSeq	+	greB	CWC46_RS00655				Gene	greB			CWC46_00655	Protein Homology	CDS	Genbank:WP_021014124.1	CDS	COORDINATES: similar to AA sequence:RefSeq:WP_008222217.1
NZ_CP025085.1	intergenic	139095	139211		intergenic_NZ_CP025085.1-nt00139095											SorTnSeq	+	intergenic_NZ_CP025085.1-nt00139095
NZ_CP025085.1	gene	139212	141200	sulfatase-like hydrolase/transferase	gene-CWC46_RS00660	-0.405798	0.374179	0.948327	-0.233601	0.594293	0.982124	8.21524	0.0938669	0.669145	1	RefSeq	+	CWC46_RS00660	CWC46_RS00660				Gene				CWC46_00660	Protein Homology	CDS	Genbank:WP_021014123.1	CDS	COORDINATES: similar to AA sequence:RefSeq:WP_005900564.1
NZ_CP025085.1	intergenic	141201	141425		intergenic_NZ_CP025085.1-nt00141201											SorTnSeq	+	intergenic_NZ_CP025085.1-nt00141201
NZ_CP025085.1	gene	141426	143132	lysophospholipid acyltransferase family protein	gene-CWC46_RS00665	-0.469391	0.457025	0.982097	-0.216278	0.635311	0.999559	7.99468	0.261508	0.247092	1	RefSeq	+	CWC46_RS00665	CWC46_RS00665				Gene				CWC46_00665	Protein Homology	CDS	Genbank:WP_021014122.1	CDS	COORDINATES: similar to AA sequence:RefSeq:WP_019845140.1
NZ_CP025085.1	intergenic	143133	143295		intergenic_NZ_CP025085.1-nt00143133											SorTnSeq	+	intergenic_NZ_CP025085.1-nt00143133
NZ_CP025085.1	gene	143296	145620	RNA-binding transcriptional accessory protein	gene-CWC46_RS00670	-1.03742	0.423951	0.975577	-0.215135	1	1	6.41625	0.528662	0.291218	1	RefSeq	+	CWC46_RS00670	CWC46_RS00670				Gene				CWC46_00670	Protein Homology	CDS	Genbank:WP_021014121.1	CDS	COORDINATES: similar to AA sequence:RefSeq:WP_010277752.1
NZ_CP025085.1	intergenic	145621	145717		intergenic_NZ_CP025085.1-nt00145621											SorTnSeq	+	intergenic_NZ_CP025085.1-nt00145621
NZ_CP025085.1	gene	145718	146491	pimeloyl-ACP methyl ester esterase BioH	gene-CWC46_RS00675	-0.384521	0.825664	1	0.465268	0.430529	0.899655	6.50944	-0.0512308	1	1	RefSeq	-	bioH	CWC46_RS00675				Gene	bioH			CWC46_00675	Protein Homology	CDS	Genbank:WP_021014120.1	CDS	COORDINATES: similar to AA sequence:RefSeq:WP_010299404.1
NZ_CP025085.1	intergenic	146492	146548		intergenic_NZ_CP025085.1-nt00146492											SorTnSeq	+	intergenic_NZ_CP025085.1-nt00146492
NZ_CP025085.1	gene	146549	147250	DNA utilization protein GntX	gene-CWC46_RS00680	0.687911	0.296208	0.900099	-0.553893	0.541257	0.954912	6.83137	0.106066	0.897423	1	RefSeq	+	gntX	CWC46_RS00680				Gene	gntX			CWC46_00680	Protein Homology	CDS	Genbank:WP_021014119.1	CDS	COORDINATES: similar to AA sequence:RefSeq:WP_010277841.1
NZ_CP025085.1	intergenic	147251	147309		intergenic_NZ_CP025085.1-nt00147251											SorTnSeq	+	intergenic_NZ_CP025085.1-nt00147251
NZ_CP025085.1	gene	147310	147885	Fe-S biogenesis protein NfuA	gene-CWC46_RS00685											RefSeq	+	nfuA	CWC46_RS00685				Gene	nfuA			CWC46_00685	Protein Homology	CDS	Genbank:WP_021014118.1	CDS	COORDINATES: similar to AA sequence:RefSeq:WP_016942932.1
NZ_CP025085.1	intergenic	147886	148081		intergenic_NZ_CP025085.1-nt00147886											SorTnSeq	+	intergenic_NZ_CP025085.1-nt00147886
NZ_CP025085.1	gene	148082	150199	4-alpha-glucanotransferase	gene-CWC46_RS00690	-0.849566	0.0149662	0.38973	0.408573	0.112438	0.608972	8.7344	-0.109924	0.590771	1	RefSeq	-	malQ	CWC46_RS00690				Gene	malQ			CWC46_00690	Protein Homology	CDS	Genbank:WP_021014117.1	CDS	COORDINATES: similar to AA sequence:RefSeq:WP_012763954.1
NZ_CP025085.1	intergenic	150200	150211		intergenic_NZ_CP025085.1-nt00150200											SorTnSeq	+	intergenic_NZ_CP025085.1-nt00150200
NZ_CP025085.1	gene	150212	152656	maltodextrin phosphorylase	gene-CWC46_RS00695	-0.324715	0.302885	0.900935	-0.455132	0.195356	0.702733	8.57102	-0.0708752	0.75566	1	RefSeq	-	malP	CWC46_RS00695				Gene	malP			CWC46_00695	Protein Homology	CDS	Genbank:WP_021014116.1	CDS	COORDINATES: similar to AA sequence:RefSeq:WP_012763953.1
NZ_CP025085.1	intergenic	152657	152702		intergenic_NZ_CP025085.1-nt00152657	-3.46026	0.25	0.861321	-0.639527	1	1	5.35741	-0.416581	1	1	SorTnSeq	+	intergenic_NZ_CP025085.1-nt00152657
NZ_CP025085.1	gene	152703	153461	DeoR/GlpR family transcriptional regulator	gene-CWC46_RS00700	-0.312448	1	1	0.742159	0.359285	0.847909	6.18753	-0.177674	0.855536	1	RefSeq	-	CWC46_RS00700	CWC46_RS00700				Gene				CWC46_00700	Protein Homology	CDS	Genbank:WP_021014115.1	CDS	COORDINATES: similar to AA sequence:RefSeq:WP_006659667.1
NZ_CP025085.1	intergenic	153462	153486		intergenic_NZ_CP025085.1-nt00153462											SorTnSeq	+	intergenic_NZ_CP025085.1-nt00153462
NZ_CP025085.1	gene	153487	154311	rhomboid family intramembrane serine protease GlpG	gene-CWC46_RS00705	-0.830103	0.242987	0.858293	-0.23654	0.643971	1	7.35729	0.320018	0.324485	1	RefSeq	-	glpG	CWC46_RS00705				Gene	glpG			CWC46_00705	Protein Homology	CDS	Genbank:WP_021014114.1	CDS	COORDINATES: similar to AA sequence:RefSeq:WP_016942929.1
NZ_CP025085.1	intergenic	154312	154797		intergenic_NZ_CP025085.1-nt00154312	0.214694	0.630639	1	0.423608	0.145493	0.636147	8.4545	-0.0482646	0.83832	1	SorTnSeq	+	intergenic_NZ_CP025085.1-nt00154312
NZ_CP025085.1	gene	154798	156078	DeoR family transcriptional regulator	gene-CWC46_RS00710	0.27255	0.12207	0.716354	0.225501	0.207748	0.718687	10.0598	0.00997941	0.909996	1	RefSeq	+	CWC46_RS00710	CWC46_RS00710				Gene				CWC46_00710	Protein Homology	CDS	Genbank:WP_021014113.1	CDS	COORDINATES: similar to AA sequence:RefSeq:WP_013814862.1
NZ_CP025085.1	intergenic	156079	156129		intergenic_NZ_CP025085.1-nt00156079											SorTnSeq	+	intergenic_NZ_CP025085.1-nt00156079
NZ_CP025085.1	gene	156130	156450	thiosulfate sulfurtransferase GlpE	gene-CWC46_RS00715	0.96596	0.242407	0.858293	0.365336	1	1	6.35746	0.4615	0.41396	1	RefSeq	-	glpE	CWC46_RS00715				Gene	glpE			CWC46_00715	Protein Homology	CDS	Genbank:WP_021014112.1	CDS	COORDINATES: similar to AA sequence:RefSeq:WP_005969310.1
NZ_CP025085.1	intergenic	156451	156526		intergenic_NZ_CP025085.1-nt00156451											SorTnSeq	+	intergenic_NZ_CP025085.1-nt00156451
NZ_CP025085.1	gene	156527	157282	HTH-type transcriptional regulator UlaR	gene-CWC46_RS00720	-1.43025	0.0350828	0.543249	-1.2465	0.0409605	0.438943	7.07001	-0.281505	0.44521	1	RefSeq	-	ulaR	CWC46_RS00720				Gene	ulaR			CWC46_00720	Protein Homology	CDS	Genbank:WP_021014111.1	CDS	COORDINATES: similar to AA sequence:RefSeq:WP_013095301.1
NZ_CP025085.1	intergenic	157283	157535		intergenic_NZ_CP025085.1-nt00157283	0.180849	1	1	-0.341815	1	1	6.02041	-0.393117	0.557198	1	SorTnSeq	+	intergenic_NZ_CP025085.1-nt00157283
NZ_CP025085.1	gene	157536	158600	L-ascorbate 6-phosphate lactonase	gene-CWC46_RS00725	-0.511983	0.663625	1	0.649327	0.34493	0.836501	6.84569	0.608691	0.0979572	1	RefSeq	-	ulaG	CWC46_RS00725				Gene	ulaG			CWC46_00725	Protein Homology	CDS	Genbank:WP_021014110.1	CDS	COORDINATES: similar to AA sequence:RefSeq:WP_003856017.1
NZ_CP025085.1	intergenic	158601	159052		intergenic_NZ_CP025085.1-nt00158601	-0.436048	1	1	0.389775	0.775852	1	5.85993	-0.308293	0.825664	1	SorTnSeq	+	intergenic_NZ_CP025085.1-nt00158601
NZ_CP025085.1	gene	159053	160450	PTS ascorbate transporter subunit IIC	gene-CWC46_RS00730	-1.12801	0.0595852	0.642244	-1.25627	0.0315404	0.418077	7.38701	-0.0516997	1	1	RefSeq	+	ulaA	CWC46_RS00730				Gene	ulaA			CWC46_00730	Protein Homology	CDS	Genbank:WP_021014109.1	CDS	COORDINATES: similar to AA sequence:RefSeq:WP_004091029.1
NZ_CP025085.1	intergenic	160451	160466		intergenic_NZ_CP025085.1-nt00160451											SorTnSeq	+	intergenic_NZ_CP025085.1-nt00160451
NZ_CP025085.1	gene	160467	160787	PTS ascorbate transporter subunit IIB	gene-CWC46_RS00735	0.183207	0.831812	1	-1.4558	0.210114	0.718687	6.43539	-0.0500144	1	1	RefSeq	+	ulaB	CWC46_RS00735				Gene	ulaB			CWC46_00735	Protein Homology	CDS	Genbank:WP_021014108.1	CDS	COORDINATES: similar to AA sequence:RefSeq:WP_014333494.1
NZ_CP025085.1	gene	160784	161254	PTS ascorbate transporter subunit IIA	gene-CWC46_RS00740	-1.33843	0.289063	0.895025	-0.00967377	1	1	5.88792	0.0571108	1	1	RefSeq	+	ulaC	CWC46_RS00740				Gene	ulaC			CWC46_00740	Protein Homology	CDS	Genbank:WP_021014107.1	CDS	COORDINATES: similar to AA sequence:RefSeq:NP_463246.1
NZ_CP025085.1	intergenic	161255	161264		intergenic_NZ_CP025085.1-nt00161255											SorTnSeq	+	intergenic_NZ_CP025085.1-nt00161255
NZ_CP025085.1	gene	161265	161918	3-keto-L-gulonate-6-phosphate decarboxylase UlaD	gene-CWC46_RS00745	-2.09518	0.0922857	0.694008	-1.31555	0.179566	0.683602	6.0701	-0.712459	0.215329	1	RefSeq	+	CWC46_RS00745	CWC46_RS00745				Gene				CWC46_00745	Protein Homology	CDS	Genbank:WP_021014106.1	CDS	COORDINATES: similar to AA sequence:RefSeq:WP_015368613.1
NZ_CP025085.1	intergenic	161919	161927		intergenic_NZ_CP025085.1-nt00161919											SorTnSeq	+	intergenic_NZ_CP025085.1-nt00161919
NZ_CP025085.1	gene	161928	162788	L-ribulose-5-phosphate 3-epimerase	gene-CWC46_RS00750	-1.21273	0.0988734	0.702433	-0.227789	0.770868	1	7.26424	-0.15055	0.681746	1	RefSeq	+	CWC46_RS00750	CWC46_RS00750				Gene				CWC46_00750	Protein Homology	CDS	Genbank:WP_021014105.1	CDS	COORDINATES: similar to AA sequence:RefSeq:WP_004091037.1
NZ_CP025085.1	intergenic	162789	163067		intergenic_NZ_CP025085.1-nt00162789											SorTnSeq	+	intergenic_NZ_CP025085.1-nt00162789
NZ_CP025085.1	gene	163068	164567	glycerol-3-phosphate dehydrogenase	gene-CWC46_RS00755	-0.389786	0.374179	0.948327	0.430477	0.202179	0.713282	8.25898	0.0698072	0.829539	1	RefSeq	+	glpD	CWC46_RS00755				Gene	glpD			CWC46_00755	Protein Homology	CDS	Genbank:WP_021014104.1	CDS	COORDINATES: similar to AA sequence:RefSeq:WP_012763928.1
NZ_CP025085.1	intergenic	164568	164625		intergenic_NZ_CP025085.1-nt00164568											SorTnSeq	+	intergenic_NZ_CP025085.1-nt00164568
NZ_CP025085.1	gene	164626	166584	p-hydroxybenzoic acid efflux pump subunit AaeB	gene-CWC46_RS00760	0.0984506	0.809951	1	-0.0316087	1	1	7.83857	-0.0385416	0.932688	1	RefSeq	-	aaeB	CWC46_RS00760				Gene	aaeB			CWC46_00760	Protein Homology	CDS	Genbank:WP_021014103.1	CDS	COORDINATES: similar to AA sequence:RefSeq:WP_015855321.1
NZ_CP025085.1	intergenic	166585	166595		intergenic_NZ_CP025085.1-nt00166585											SorTnSeq	+	intergenic_NZ_CP025085.1-nt00166585
NZ_CP025085.1	gene	166596	167633	p-hydroxybenzoic acid efflux pump subunit AaeA	gene-CWC46_RS00765	0.372739	0.701109	1	-0.28346	0.83882	1	6.74973	0.222593	0.688882	1	RefSeq	-	aaeA	CWC46_RS00765				Gene	aaeA			CWC46_00765	Protein Homology	CDS	Genbank:WP_084297580.1	CDS	COORDINATES: similar to AA sequence:RefSeq:WP_017801492.1
NZ_CP025085.1	gene	167551	167754	AaeX family protein	gene-CWC46_RS00770											RefSeq	-	CWC46_RS00770	CWC46_RS00770				Gene				CWC46_00770	Protein Homology	CDS	Genbank:WP_021014101.1	CDS	COORDINATES: similar to AA sequence:RefSeq:WP_012772985.1
NZ_CP025085.1	intergenic	167755	168174		intergenic_NZ_CP025085.1-nt00167755	-1.11714	0.423951	0.975577	-1.23995	0.301759	0.790627	6.33716	0.286754	0.643971	1	SorTnSeq	+	intergenic_NZ_CP025085.1-nt00167755
NZ_CP025085.1	gene	168175	169119	HTH-type transcriptional activator AaeR	gene-CWC46_RS00775	-0.221783	0.84502	1	-0.132798	1	1	6.80217	0.054261	1	1	RefSeq	+	aaeR	CWC46_RS00775				Gene	aaeR			CWC46_00775	Protein Homology	CDS	Genbank:WP_021014100.1	CDS	COORDINATES: similar to AA sequence:RefSeq:WP_015848133.1
NZ_CP025085.1	intergenic	169120	169197		intergenic_NZ_CP025085.1-nt00169120											SorTnSeq	+	intergenic_NZ_CP025085.1-nt00169120
NZ_CP025085.1	gene	169198	170643	metalloprotease TldD	gene-CWC46_RS00780	-0.766236	0.775852	1	-0.33856	1	1	6.07012	0.0119472	1	1	RefSeq	-	tldD	CWC46_RS00780				Gene	tldD			CWC46_00780	Protein Homology	CDS	Genbank:WP_021014099.1	CDS	COORDINATES: similar to AA sequence:RefSeq:WP_007888214.1
NZ_CP025085.1	intergenic	170644	170689		intergenic_NZ_CP025085.1-nt00170644											SorTnSeq	+	intergenic_NZ_CP025085.1-nt00170644
NZ_CP025085.1	gene	170690	174526	AsmA2 domain-containing protein	gene-CWC46_RS00785	-0.550545	0.440802	0.982097	-0.679409	0.279959	0.782459	7.51821	0.46976	0.0985289	1	RefSeq	-	CWC46_RS00785	CWC46_RS00785				Gene				CWC46_00785	Protein Homology	CDS	Genbank:WP_021014098.1	CDS	COORDINATES: similar to AA sequence:RefSeq:WP_015855326.1
NZ_CP025085.1	intergenic	174527	174658		intergenic_NZ_CP025085.1-nt00174527											SorTnSeq	+	intergenic_NZ_CP025085.1-nt00174527
NZ_CP025085.1	gene	174659	176128	ribonuclease G	gene-CWC46_RS00790											RefSeq	-	rng	CWC46_RS00790				Gene	rng			CWC46_00790	Protein Homology	CDS	Genbank:WP_021014097.1	CDS	COORDINATES: similar to AA sequence:RefSeq:WP_006818051.1
NZ_CP025085.1	gene	176118	176711	septum formation inhibitor Maf	gene-CWC46_RS00795	-1.33843	0.507813	1	-4.29976	0.125	0.608972	5.77241	-0.054794	1	1	RefSeq	-	CWC46_RS00795	CWC46_RS00795				Gene				CWC46_00795	Protein Homology	CDS	Genbank:WP_021014096.1	CDS	COORDINATES: similar to AA sequence:RefSeq:WP_012883017.1
NZ_CP025085.1	intergenic	176712	176720		intergenic_NZ_CP025085.1-nt00176712											SorTnSeq	+	intergenic_NZ_CP025085.1-nt00176712
NZ_CP025085.1	gene	176721	177209	rod shape-determining protein MreD	gene-CWC46_RS00800											RefSeq	-	mreD	CWC46_RS00800				Gene	mreD			CWC46_00800	Protein Homology	CDS	Genbank:WP_021014095.1	CDS	COORDINATES: similar to AA sequence:RefSeq:WP_003855265.1
NZ_CP025085.1	gene	177206	178192	rod shape-determining protein MreC	gene-CWC46_RS00805											RefSeq	-	mreC	CWC46_RS00805				Gene	mreC			CWC46_00805	Protein Homology	CDS	Genbank:WP_021014094.1	CDS	COORDINATES: similar to AA sequence:RefSeq:WP_013315987.1
NZ_CP025085.1	intergenic	178193	178288		intergenic_NZ_CP025085.1-nt00178193											SorTnSeq	+	intergenic_NZ_CP025085.1-nt00178193
NZ_CP025085.1	gene	178289	179332	rod shape-determining protein MreB	gene-CWC46_RS00810											RefSeq	-	mreB	CWC46_RS00810				Gene	mreB			CWC46_00810	Protein Homology	CDS	Genbank:WP_021014093.1	CDS	COORDINATES: similar to AA sequence:RefSeq:WP_000913396.1
NZ_CP025085.1	intergenic	179333	179366		intergenic_NZ_CP025085.1-nt00179333											SorTnSeq	+	intergenic_NZ_CP025085.1-nt00179333
NZ_CP025085.1	gene	179367	179528	hypothetical protein	gene-CWC46_RS22760	1.06799	0.237886	0.849808	-4.52945	0.0703128	0.535321	6.07014	0.0237054	1	1	RefSeq	+	CWC46_RS22760	CWC46_RS22760				Gene					GeneMarkS-2+	CDS	Genbank:WP_157831353.1	CDS	COORDINATES: ab initio prediction:GeneMarkS-2+
NZ_CP025085.1	intergenic	179529	179648		intergenic_NZ_CP025085.1-nt00179529	1.29748	0.143464	0.738339	0.386808	0.774414	1	6.02046	-0.176114	0.831812	1	SorTnSeq	+	intergenic_NZ_CP025085.1-nt00179529
NZ_CP025085.1	gene	179649	181598	RNase E specificity factor CsrD	gene-CWC46_RS00815	0.963679	0.0087724	0.317889	-0.687627	0.211612	0.719223	7.96228	0.532511	0.0292488	1	RefSeq	-	csrD	CWC46_RS00815				Gene	csrD			CWC46_00815	Protein Homology	CDS	Genbank:WP_021014092.1	CDS	COORDINATES: similar to AA sequence:RefSeq:WP_004958057.1
NZ_CP025085.1	intergenic	181599	181756		intergenic_NZ_CP025085.1-nt00181599	0.212921	0.84502	1	0.589427	0.361597	0.848724	6.72672	0.0397091	1	1	SorTnSeq	+	intergenic_NZ_CP025085.1-nt00181599
NZ_CP025085.1	gene	181757	182740	oxidoreductase	gene-CWC46_RS00820	-0.219054	0.72755	1	-0.349098	0.41599	0.895847	8.05156	0.098648	0.704774	1	RefSeq	+	CWC46_RS00820	CWC46_RS00820				Gene				CWC46_00820	Protein Homology	CDS	Genbank:WP_021014091.1	CDS	COORDINATES: similar to AA sequence:RefSeq:WP_015848141.1
NZ_CP025085.1	intergenic	182741	182959		intergenic_NZ_CP025085.1-nt00182741	-1.0654	0.453125	0.982097	-4.02644	0.21875	0.723946	5.71101	0.224823	1	1	SorTnSeq	+	intergenic_NZ_CP025085.1-nt00182741
NZ_CP025085.1	gene	182960	183961	protein-methionine-sulfoxide reductase catalytic subunit MsrP	gene-CWC46_RS00825	-0.30081	0.613977	1	-0.430413	0.381245	0.874004	7.70308	-0.0786187	0.743663	1	RefSeq	+	msrP	CWC46_RS00825				Gene	msrP			CWC46_00825	Protein Homology	CDS	Genbank:WP_021014090.1	CDS	COORDINATES: similar to AA sequence:RefSeq:WP_010681554.1
NZ_CP025085.1	gene	183962	184561	protein-methionine-sulfoxide reductase heme-binding subunit MsrQ	gene-CWC46_RS00830	-0.833613	0.20049	0.830484	-1.2719	0.0987385	0.603951	6.94228	-0.0659741	0.907562	1	RefSeq	+	msrQ	CWC46_RS00830				Gene	msrQ			CWC46_00830	Protein Homology	CDS	Genbank:WP_021014089.1	CDS	COORDINATES: similar to AA sequence:RefSeq:WP_006812170.1
NZ_CP025085.1	intergenic	184562	184801		intergenic_NZ_CP025085.1-nt00184562											SorTnSeq	+	intergenic_NZ_CP025085.1-nt00184562
NZ_CP025085.1	gene	184802	185254	type II 3-dehydroquinate dehydratase	gene-CWC46_RS00835											RefSeq	+	aroQ	CWC46_RS00835				Gene	aroQ			CWC46_00835	Protein Homology	CDS	Genbank:WP_021014088.1	CDS	COORDINATES: similar to AA sequence:RefSeq:WP_002210071.1
NZ_CP025085.1	intergenic	185255	185275		intergenic_NZ_CP025085.1-nt00185255											SorTnSeq	+	intergenic_NZ_CP025085.1-nt00185255
NZ_CP025085.1	gene	185276	185734	acetyl-CoA carboxylase biotin carboxyl carrier protein	gene-CWC46_RS00840											RefSeq	+	accB	CWC46_RS00840				Gene	accB	fabE		CWC46_00840	Protein Homology	CDS	Genbank:WP_021014087.1	CDS	COORDINATES: similar to AA sequence:RefSeq:YP_005229096.1
NZ_CP025085.1	intergenic	185735	185745		intergenic_NZ_CP025085.1-nt00185735											SorTnSeq	+	intergenic_NZ_CP025085.1-nt00185735
NZ_CP025085.1	gene	185746	187089	acetyl-CoA carboxylase biotin carboxylase subunit	gene-CWC46_RS00845											RefSeq	+	accC	CWC46_RS00845				Gene	accC			CWC46_00845	Protein Homology	CDS	Genbank:WP_021014086.1	CDS	COORDINATES: similar to AA sequence:RefSeq:WP_009483995.1
NZ_CP025085.1	intergenic	187090	187384		intergenic_NZ_CP025085.1-nt00187090											SorTnSeq	+	intergenic_NZ_CP025085.1-nt00187090
NZ_CP025085.1	gene	187385	187627	YhdT family protein	gene-CWC46_RS00850	-0.162921	1	1	0.263645	0.753907	1	5.77246	-0.0289644	1	1	RefSeq	+	CWC46_RS00850	CWC46_RS00850				Gene				CWC46_00850	Protein Homology	CDS	Genbank:WP_037380501.1	CDS	COORDINATES: similar to AA sequence:RefSeq:WP_012883006.1
NZ_CP025085.1	gene	187617	189068	sodium/pantothenate symporter	gene-CWC46_RS00855	0.209434	0.862393	1	-2.90213	0.00284211	0.138987	7.04534	0.528887	0.135091	1	RefSeq	+	panF	CWC46_RS00855				Gene	panF			CWC46_00855	Protein Homology	CDS	Genbank:WP_021014084.1	CDS	COORDINATES: similar to AA sequence:RefSeq:WP_019080087.1
NZ_CP025085.1	intergenic	189069	189084		intergenic_NZ_CP025085.1-nt00189069											SorTnSeq	+	intergenic_NZ_CP025085.1-nt00189069
NZ_CP025085.1	gene	189085	189972	50S ribosomal protein L11 methyltransferase	gene-CWC46_RS00860	0.540732	0.523468	1	-1.31555	0.179566	0.683602	6.18753	-0.824364	0.149614	1	RefSeq	+	prmA	CWC46_RS00860				Gene	prmA			CWC46_00860	Protein Homology	CDS	Genbank:WP_021014083.1	CDS	COORDINATES: similar to AA sequence:RefSeq:WP_005975349.1
NZ_CP025085.1	intergenic	189973	190293		intergenic_NZ_CP025085.1-nt00189973											SorTnSeq	+	intergenic_NZ_CP025085.1-nt00189973
NZ_CP025085.1	gene	190294	191259	tRNA dihydrouridine synthase DusB	gene-CWC46_RS00865											RefSeq	+	dusB	CWC46_RS00865				Gene	dusB			CWC46_00865	Protein Homology	CDS	Genbank:WP_037381080.1	CDS	COORDINATES: similar to AA sequence:RefSeq:NP_312159.1
NZ_CP025085.1	intergenic	191260	191282		intergenic_NZ_CP025085.1-nt00191260											SorTnSeq	+	intergenic_NZ_CP025085.1-nt00191260
NZ_CP025085.1	gene	191283	191579	DNA-binding transcriptional regulator Fis	gene-CWC46_RS00870											RefSeq	+	fis	CWC46_RS00870				Gene	fis			CWC46_00870	Protein Homology	CDS	Genbank:WP_012883002.1	CDS	COORDINATES: similar to AA sequence:RefSeq:WP_001465625.1
NZ_CP025085.1	intergenic	191580	191700		intergenic_NZ_CP025085.1-nt00191580											SorTnSeq	+	intergenic_NZ_CP025085.1-nt00191580
NZ_CP025085.1	gene	191701	192846	endonuclease/exonuclease/phosphatase family protein	gene-CWC46_RS00875	-0.550545	0.440802	0.982097	-0.512661	0.451383	0.907018	7.32696	-0.00871426	1	1	RefSeq	-	CWC46_RS00875	CWC46_RS00875				Gene				CWC46_00875	Protein Homology	CDS	Genbank:WP_021014081.1	CDS	COORDINATES: similar to AA sequence:RefSeq:WP_019843538.1
NZ_CP025085.1	intergenic	192847	193135		intergenic_NZ_CP025085.1-nt00192847											SorTnSeq	+	intergenic_NZ_CP025085.1-nt00192847
NZ_CP025085.1	gene	193136	193906	amino acid ABC transporter substrate-binding protein	gene-CWC46_RS00880	-1.11715	0.423951	0.975577	-1.23995	0.179566	0.683602	6.18744	-0.178399	0.73588	1	RefSeq	+	CWC46_RS00880	CWC46_RS00880				Gene				CWC46_00880	Protein Homology	CDS	Genbank:WP_021014080.1	CDS	COORDINATES: similar to AA sequence:RefSeq:WP_014913818.1
NZ_CP025085.1	intergenic	193907	193932		intergenic_NZ_CP025085.1-nt00193907											SorTnSeq	+	intergenic_NZ_CP025085.1-nt00193907
NZ_CP025085.1	gene	193933	194598	amino acid ABC transporter permease	gene-CWC46_RS00885	-0.641763	0.62906	1	-0.37051	0.62906	0.998478	6.23188	-0.420969	0.499562	1	RefSeq	+	CWC46_RS00885	CWC46_RS00885				Gene				CWC46_00885	Protein Homology	CDS	Genbank:WP_021014079.1	CDS	COORDINATES: similar to AA sequence:RefSeq:WP_005975327.1
NZ_CP025085.1	intergenic	194599	194743		intergenic_NZ_CP025085.1-nt00194599											SorTnSeq	+	intergenic_NZ_CP025085.1-nt00194599
NZ_CP025085.1	gene	194744	195439	CTP synthase	gene-CWC46_RS00890	-5.17081	0.00634773	0.273278	-0.200087	1	1	6.50933	0.327569	0.479891	1	RefSeq	+	CWC46_RS00890	CWC46_RS00890				Gene				CWC46_00890	Protein Homology	CDS	Genbank:WP_021014078.1	CDS	COORDINATES: similar to AA sequence:RefSeq:WP_012882993.1
NZ_CP025085.1	intergenic	195440	195738		intergenic_NZ_CP025085.1-nt00195440	-0.665439	0.548829	1	0.723279	0.454499	0.907018	6.14171	0.199877	0.855536	1	SorTnSeq	+	intergenic_NZ_CP025085.1-nt00195440
NZ_CP025085.1	gene	195739	196764	amino acid ABC transporter substrate-binding protein	gene-CWC46_RS00895	-0.762357	0.310507	0.900935	0.20443	0.880397	1	7.29595	0.213525	0.534065	1	RefSeq	+	CWC46_RS00895	CWC46_RS00895				Gene				CWC46_00895	Protein Homology	CDS	Genbank:WP_037381078.1	CDS	COORDINATES: similar to AA sequence:RefSeq:WP_013204099.1
NZ_CP025085.1	intergenic	196765	196839		intergenic_NZ_CP025085.1-nt00196765											SorTnSeq	+	intergenic_NZ_CP025085.1-nt00196765
NZ_CP025085.1	gene	196840	198018	amino acid ABC transporter permease	gene-CWC46_RS00900	-1.05262	0.121451	0.716354	-0.519259	0.417695	0.895847	7.11814	-0.146869	0.743647	1	RefSeq	+	CWC46_RS00900	CWC46_RS00900				Gene				CWC46_00900	Protein Homology	CDS	Genbank:WP_021014076.1	CDS	COORDINATES: similar to AA sequence:RefSeq:WP_005975321.1
NZ_CP025085.1	intergenic	198019	198031		intergenic_NZ_CP025085.1-nt00198019											SorTnSeq	+	intergenic_NZ_CP025085.1-nt00198019
NZ_CP025085.1	gene	198032	199120	amino acid ABC transporter permease	gene-CWC46_RS00905	-0.320304	0.728334	1	-0.921239	0.136047	0.624108	6.8879	-0.264087	0.544616	1	RefSeq	+	CWC46_RS00905	CWC46_RS00905				Gene				CWC46_00905	Protein Homology	CDS	Genbank:WP_021014075.1	CDS	COORDINATES: similar to AA sequence:RefSeq:WP_015855356.1
NZ_CP025085.1	intergenic	199121	199128		intergenic_NZ_CP025085.1-nt00199121											SorTnSeq	+	intergenic_NZ_CP025085.1-nt00199121
NZ_CP025085.1	gene	199129	199890	amino acid ABC transporter ATP-binding protein	gene-CWC46_RS00910	-1.19302	0.181388	0.805114	0.413984	0.52621	0.948986	6.47288	0.266478	0.655821	1	RefSeq	+	CWC46_RS00910	CWC46_RS00910				Gene				CWC46_00910	Protein Homology	CDS	Genbank:WP_021014074.1	CDS	COORDINATES: similar to AA sequence:RefSeq:WP_014913813.1
NZ_CP025085.1	intergenic	199891	199948		intergenic_NZ_CP025085.1-nt00199891											SorTnSeq	+	intergenic_NZ_CP025085.1-nt00199891
NZ_CP025085.1	pseudogene	199949	200745	ROK family protein	gene-CWC46_RS00915	-4.39318	0.125	0.716354	-1.57362	0.289063	0.782459	5.71102	-0.576257	0.383312	1	RefSeq	-	CWC46_RS00915	CWC46_RS00915			pseudo	Gene				CWC46_00915	Protein Homology	CDS		CDS	COORDINATES: similar to AA sequence:RefSeq:WP_006325051.1	frameshifted
NZ_CP025085.1	gene	200737	200852	5S ribosomal RNA	gene-CWC46_RS00920											RefSeq	-	rrf	CWC46_RS00920				Gene	rrf			CWC46_00920	cmsearch	rRNA	RFAM:RF00001	rRNA	COORDINATES: profile:INFERNAL:1.1.1
NZ_CP025085.1	intergenic	200853	200945		intergenic_NZ_CP025085.1-nt00200853											SorTnSeq	+	intergenic_NZ_CP025085.1-nt00200853
NZ_CP025085.1	gene	200946	204063	23S ribosomal RNA	gene-CWC46_RS00925											RefSeq	-	CWC46_RS00925	CWC46_RS00925				Gene				CWC46_00925	RefSeq	rRNA		rRNA
NZ_CP025085.1	intergenic	204064	204255		intergenic_NZ_CP025085.1-nt00204064											SorTnSeq	+	intergenic_NZ_CP025085.1-nt00204064
NZ_CP025085.1	gene	204256	204331	tRNA-Ala	gene-CWC46_RS00930											RefSeq	-	CWC46_RS00930	CWC46_RS00930				Gene				CWC46_00930	tRNAscan-SE	tRNA		tRNA	COORDINATES: profile:tRNAscan-SE:2.0.4
NZ_CP025085.1	intergenic	204332	204431		intergenic_NZ_CP025085.1-nt00204332											SorTnSeq	+	intergenic_NZ_CP025085.1-nt00204332
NZ_CP025085.1	gene	204432	204508	tRNA-Ile	gene-CWC46_RS00935											RefSeq	-	CWC46_RS00935	CWC46_RS00935				Gene				CWC46_00935	tRNAscan-SE	tRNA		tRNA	COORDINATES: profile:tRNAscan-SE:2.0.4
NZ_CP025085.1	intergenic	204509	204570		intergenic_NZ_CP025085.1-nt00204509											SorTnSeq	+	intergenic_NZ_CP025085.1-nt00204509
NZ_CP025085.1	gene	204571	206120	16S ribosomal RNA	gene-CWC46_RS00940											RefSeq	-	CWC46_RS00940	CWC46_RS00940				Gene				CWC46_00940	RefSeq	rRNA		rRNA
NZ_CP025085.1	intergenic	206121	206506		intergenic_NZ_CP025085.1-nt00206121											SorTnSeq	+	intergenic_NZ_CP025085.1-nt00206121
NZ_CP025085.1	gene	206507	207046	menaquinone-dependent protoporphyrinogen IX dehydrogenase	gene-CWC46_RS00945											RefSeq	-	hemG	CWC46_RS00945				Gene	hemG			CWC46_00945	Protein Homology	CDS	Genbank:WP_021014041.1	CDS	COORDINATES: similar to AA sequence:RefSeq:WP_014913790.1
NZ_CP025085.1	intergenic	207047	207065		intergenic_NZ_CP025085.1-nt00207047											SorTnSeq	+	intergenic_NZ_CP025085.1-nt00207047
NZ_CP025085.1	gene	207066	208517	Trk system potassium transporter TrkH	gene-CWC46_RS00950											RefSeq	-	trkH	CWC46_RS00950				Gene	trkH			CWC46_00950	Protein Homology	CDS	Genbank:WP_021014040.1	CDS	COORDINATES: similar to AA sequence:RefSeq:NP_312804.1
NZ_CP025085.1	intergenic	208518	208557		intergenic_NZ_CP025085.1-nt00208518											SorTnSeq	+	intergenic_NZ_CP025085.1-nt00208518
NZ_CP025085.1	gene	208558	209172	IMPACT family protein	gene-CWC46_RS00955	-1.43025	0.0576138	0.639208	-0.585467	0.429593	0.898613	7.15317	-0.148439	0.749332	1	RefSeq	-	CWC46_RS00955	CWC46_RS00955				Gene				CWC46_00955	Protein Homology	CDS	Genbank:WP_021014039.1	CDS	COORDINATES: similar to AA sequence:RefSeq:WP_012004733.1
NZ_CP025085.1	gene	209172	210503	Xaa-Pro dipeptidase	gene-CWC46_RS00960	-0.402862	0.328436	0.921205	-0.876132	0.0300172	0.406618	7.96207	0.192543	0.44186	1	RefSeq	-	pepQ	CWC46_RS00960				Gene	pepQ			CWC46_00960	Protein Homology	CDS	Genbank:WP_021014038.1	CDS	COORDINATES: similar to AA sequence:RefSeq:WP_019080135.1
NZ_CP025085.1	intergenic	210504	210684		intergenic_NZ_CP025085.1-nt00210504											SorTnSeq	+	intergenic_NZ_CP025085.1-nt00210504
NZ_CP025085.1	gene	210685	212874	fatty acid oxidation complex subunit alpha FadB	gene-CWC46_RS00965	-0.415059	0.358147	0.934991	-0.325014	0.614658	0.992491	7.83125	0.242929	0.32559	1	RefSeq	+	fadB	CWC46_RS00965				Gene	fadB			CWC46_00965	Protein Homology	CDS	Genbank:WP_021014037.1	CDS	COORDINATES: similar to AA sequence:RefSeq:WP_010283827.1
NZ_CP025085.1	intergenic	212875	212885		intergenic_NZ_CP025085.1-nt00212875											SorTnSeq	+	intergenic_NZ_CP025085.1-nt00212875
NZ_CP025085.1	gene	212886	214049	acetyl-CoA C-acyltransferase FadA	gene-CWC46_RS00970	-0.737868	0.404874	0.965527	-1.80961	0.04139	0.438943	6.52727	-0.346923	0.401065	1	RefSeq	+	fadA	CWC46_RS00970				Gene	fadA			CWC46_00970	Protein Homology	CDS	Genbank:WP_021014036.1	CDS	COORDINATES: similar to AA sequence:RefSeq:NP_312800.1
NZ_CP025085.1	intergenic	214050	214192		intergenic_NZ_CP025085.1-nt00214050											SorTnSeq	+	intergenic_NZ_CP025085.1-nt00214050
NZ_CP025085.1	gene	214193	214894	NAD(P)H-flavin reductase	gene-CWC46_RS00975											RefSeq	-	fre	CWC46_RS00975				Gene	fre			CWC46_00975	Protein Homology	CDS	Genbank:WP_021014034.1	CDS	COORDINATES: similar to AA sequence:RefSeq:WP_005973445.1
NZ_CP025085.1	intergenic	214895	214947		intergenic_NZ_CP025085.1-nt00214895											SorTnSeq	+	intergenic_NZ_CP025085.1-nt00214895
NZ_CP025085.1	gene	214948	216444	4-hydroxy-3-polyprenylbenzoate decarboxylase	gene-CWC46_RS00980											RefSeq	-	ubiD	CWC46_RS00980				Gene	ubiD			CWC46_00980	Protein Homology	CDS	Genbank:WP_021014033.1	CDS	COORDINATES: similar to AA sequence:RefSeq:WP_011091844.1
NZ_CP025085.1	intergenic	216445	216567		intergenic_NZ_CP025085.1-nt00216445	-0.52481	1	1	-3.48508	0.25	0.761797	5.31677	-0.71212	0.753907	1	SorTnSeq	+	intergenic_NZ_CP025085.1-nt00216445
NZ_CP025085.1	gene	216568	217056	transcription/translation regulatory transformer protein RfaH	gene-CWC46_RS00985	0.0673911	1	1	-0.37051	0.81453	1	6.54501	0.469462	0.31233	1	RefSeq	+	rfaH	CWC46_RS00985				Gene	rfaH			CWC46_00985	Protein Homology	CDS	Genbank:WP_021014032.1	CDS	COORDINATES: similar to AA sequence:RefSeq:WP_012004725.1
NZ_CP025085.1	intergenic	217057	217096		intergenic_NZ_CP025085.1-nt00217057											SorTnSeq	+	intergenic_NZ_CP025085.1-nt00217057
NZ_CP025085.1	gene	217097	218119	porphobilinogen synthase	gene-CWC46_RS00990											RefSeq	-	hemB	CWC46_RS00990				Gene	hemB			CWC46_00990	Protein Homology	CDS	Genbank:WP_021014031.1	CDS	COORDINATES: similar to AA sequence:RefSeq:WP_015842141.1
NZ_CP025085.1	intergenic	218120	218135		intergenic_NZ_CP025085.1-nt00218120											SorTnSeq	+	intergenic_NZ_CP025085.1-nt00218120
NZ_CP025085.1	gene	218136	218918	3'-5' ssDNA/RNA exonuclease TatD	gene-CWC46_RS00995	0.0852697	1	1	-0.98602	0.581055	0.971935	6.02041	-0.490295	0.44207	1	RefSeq	-	tatD	CWC46_RS00995				Gene	tatD			CWC46_00995	Protein Homology	CDS	Genbank:WP_021014030.1	CDS	COORDINATES: similar to AA sequence:RefSeq:WP_005973439.1
NZ_CP025085.1	intergenic	218919	219083		intergenic_NZ_CP025085.1-nt00218919											SorTnSeq	+	intergenic_NZ_CP025085.1-nt00218919
NZ_CP025085.1	gene	219084	219845	Sec-independent protein translocase subunit TatC	gene-CWC46_RS01000											RefSeq	-	tatC	CWC46_RS01000				Gene	tatC			CWC46_01000	Protein Homology	CDS	Genbank:WP_021014029.1	CDS	COORDINATES: similar to AA sequence:RefSeq:WP_015842143.1
NZ_CP025085.1	intergenic	219846	219848		intergenic_NZ_CP025085.1-nt00219846											SorTnSeq	+	intergenic_NZ_CP025085.1-nt00219846
NZ_CP025085.1	gene	219849	220355	Sec-independent protein translocase subunit TatB	gene-CWC46_RS01005	0.652702	0.62906	1	-1.882	0.109375	0.608972	6.49121	0.939313	0.0399873	1	RefSeq	-	tatB	CWC46_RS01005				Gene	tatB			CWC46_01005	Protein Homology	CDS	Genbank:WP_021014028.1	CDS	COORDINATES: similar to AA sequence:RefSeq:WP_015848209.1
NZ_CP025085.1	intergenic	220356	220358		intergenic_NZ_CP025085.1-nt00220356											SorTnSeq	+	intergenic_NZ_CP025085.1-nt00220356
NZ_CP025085.1	gene	220359	220616	Sec-independent protein translocase subunit TatA	gene-CWC46_RS01010											RefSeq	-	tatA	CWC46_RS01010				Gene	tatA			CWC46_01010	Protein Homology	CDS	Genbank:WP_021014027.1	CDS	COORDINATES: similar to AA sequence:RefSeq:WP_012847030.1
NZ_CP025085.1	intergenic	220617	220700		intergenic_NZ_CP025085.1-nt00220617											SorTnSeq	+	intergenic_NZ_CP025085.1-nt00220617
NZ_CP025085.1	gene	220701	222338	ubiquinone biosynthesis regulatory protein kinase UbiB	gene-CWC46_RS01015											RefSeq	-	ubiB	CWC46_RS01015				Gene	ubiB			CWC46_01015	Protein Homology	CDS	Genbank:WP_021014026.1	CDS	COORDINATES: similar to AA sequence:RefSeq:WP_014913780.1
NZ_CP025085.1	gene	222335	222943	SCP2 domain-containing protein	gene-CWC46_RS01020											RefSeq	-	CWC46_RS01020	CWC46_RS01020				Gene				CWC46_01020	Protein Homology	CDS	Genbank:WP_021014025.1	CDS	COORDINATES: similar to AA sequence:RefSeq:WP_006323096.1
NZ_CP025085.1	intergenic	222944	222957		intergenic_NZ_CP025085.1-nt00222944											SorTnSeq	+	intergenic_NZ_CP025085.1-nt00222944
NZ_CP025085.1	gene	222958	223713	bifunctional demethylmenaquinone methyltransferase/2-methoxy-6-polyprenyl-1%2C4-benzoquinol methylase UbiE	gene-CWC46_RS01025											RefSeq	-	ubiE	CWC46_RS01025				Gene	ubiE			CWC46_01025	Protein Homology	CDS	Genbank:WP_021014024.1	CDS	COORDINATES: similar to AA sequence:RefSeq:NP_312790.1
NZ_CP025085.1	intergenic	223714	223886		intergenic_NZ_CP025085.1-nt00223714	-0.138082	1	1	-1.52113	0.143464	0.636147	6.3574	-0.386518	0.532711	1	SorTnSeq	+	intergenic_NZ_CP025085.1-nt00223714
NZ_CP025085.1	gene	223887	225389	DNA recombination protein RmuC	gene-CWC46_RS01030	-0.23395	0.880397	1	-1.65112	0.0200744	0.343928	7.43524	0.327203	0.258869	1	RefSeq	-	rmuC	CWC46_RS01030				Gene	rmuC			CWC46_01030	Protein Homology	CDS	Genbank:WP_021014023.1	CDS	COORDINATES: similar to AA sequence:RefSeq:WP_010283799.1
NZ_CP025085.1	intergenic	225390	225583		intergenic_NZ_CP025085.1-nt00225390											SorTnSeq	+	intergenic_NZ_CP025085.1-nt00225390
NZ_CP025085.1	gene	225584	227092	serine hydrolase	gene-CWC46_RS01035	-0.533892	0.322239	0.921205	-0.290003	0.688882	1	7.5883	-0.0398462	1	1	RefSeq	-	CWC46_RS01035	CWC46_RS01035				Gene				CWC46_01035	Protein Homology	CDS	Genbank:WP_021014022.1	CDS	COORDINATES: similar to AA sequence:RefSeq:WP_013319954.1
NZ_CP025085.1	gene	227089	227829	ABC transporter ATP-binding protein	gene-CWC46_RS01040	-0.886733	0.424358	0.975577	-1.0135	0.229524	0.731718	6.75727	-0.0440823	1	1	RefSeq	-	CWC46_RS01040	CWC46_RS01040				Gene				CWC46_01040	Protein Homology	CDS	Genbank:WP_021014021.1	CDS	COORDINATES: similar to AA sequence:RefSeq:WP_008106679.1
NZ_CP025085.1	gene	227826	228656	ABC transporter ATP-binding protein	gene-CWC46_RS01045	-0.0903512	1	1	-0.880121	0.184935	0.68696	6.95564	-0.0214229	1	1	RefSeq	-	CWC46_RS01045	CWC46_RS01045				Gene				CWC46_01045	Protein Homology	CDS	Genbank:WP_021014020.1	CDS	COORDINATES: similar to AA sequence:RefSeq:WP_009639114.1
NZ_CP025085.1	gene	228657	229559	ABC transporter permease	gene-CWC46_RS01050	0.268555	0.73588	1	-0.0100139	1	1	7.14167	0.35511	0.314312	1	RefSeq	-	CWC46_RS01050	CWC46_RS01050				Gene				CWC46_01050	Protein Homology	CDS	Genbank:WP_021014019.1	CDS	COORDINATES: similar to AA sequence:RefSeq:WP_015848287.1
NZ_CP025085.1	gene	229556	230566	ABC transporter permease	gene-CWC46_RS01055	-1.30091	0.0335533	0.539962	-2.1358	0.00187831	0.106304	7.35716	0.127373	0.704383	1	RefSeq	-	CWC46_RS01055	CWC46_RS01055				Gene				CWC46_01055	Protein Homology	CDS	Genbank:WP_021014018.1	CDS	COORDINATES: similar to AA sequence:RefSeq:WP_016943495.1
NZ_CP025085.1	gene	230566	232161	ABC transporter substrate-binding protein	gene-CWC46_RS01060	-1.15081	0.1325	0.738339	-1.98566	0.00455155	0.173012	7.28529	0.23126	0.492651	1	RefSeq	-	CWC46_RS01060	CWC46_RS01060				Gene				CWC46_01060	Protein Homology	CDS	Genbank:WP_021014017.1	CDS	COORDINATES: similar to AA sequence:RefSeq:WP_007893736.1
NZ_CP025085.1	intergenic	232162	232363		intergenic_NZ_CP025085.1-nt00232162											SorTnSeq	+	intergenic_NZ_CP025085.1-nt00232162
NZ_CP025085.1	gene	232364	233440	membrane dipeptidase	gene-CWC46_RS01065	-0.413576	0.542386	1	-0.542663	0.451383	0.907018	7.36731	0.0141839	1	1	RefSeq	+	CWC46_RS01065	CWC46_RS01065				Gene				CWC46_01065	Protein Homology	CDS	Genbank:WP_021014016.1	CDS	COORDINATES: similar to AA sequence:RefSeq:WP_009639110.1
NZ_CP025085.1	intergenic	233441	233588		intergenic_NZ_CP025085.1-nt00233441											SorTnSeq	+	intergenic_NZ_CP025085.1-nt00233441
NZ_CP025085.1	gene	233589	234497	LysR family transcriptional regulator	gene-CWC46_RS01070	-0.710228	0.34493	0.928106	-0.837794	0.264933	0.767807	6.98181	0.23066	0.566577	1	RefSeq	+	CWC46_RS01070	CWC46_RS01070				Gene				CWC46_01070	Protein Homology	CDS	Genbank:WP_021014015.1	CDS	COORDINATES: similar to AA sequence:RefSeq:WP_010284274.1
NZ_CP025085.1	intergenic	234498	234801		intergenic_NZ_CP025085.1-nt00234498	-0.9067	0.6875	1	-1.02199	0.6875	1	5.4729	-0.811527	0.581055	1	SorTnSeq	+	intergenic_NZ_CP025085.1-nt00234498
NZ_CP025085.1	gene	234802	235665	YicC family protein	gene-CWC46_RS01075											RefSeq	+	CWC46_RS01075	CWC46_RS01075				Gene				CWC46_01075	Protein Homology	CDS	Genbank:WP_021014014.1	CDS	COORDINATES: similar to AA sequence:RefSeq:WP_005122606.1
NZ_CP025085.1	intergenic	235666	235968		intergenic_NZ_CP025085.1-nt00235666											SorTnSeq	+	intergenic_NZ_CP025085.1-nt00235666
NZ_CP025085.1	gene	235969	237246	site-specific integrase	gene-CWC46_RS01080	-0.172022	0.63583	1	-0.617465	0.348891	0.842759	7.47275	0.431652	0.13193	1	RefSeq	+	CWC46_RS01080	CWC46_RS01080				Gene				CWC46_01080	Protein Homology	CDS	Genbank:WP_021014013.1	CDS	COORDINATES: similar to AA sequence:RefSeq:WP_015485389.1
NZ_CP025085.1	intergenic	237247	237346		intergenic_NZ_CP025085.1-nt00237247											SorTnSeq	+	intergenic_NZ_CP025085.1-nt00237247
NZ_CP025085.1	gene	237347	237685	hypothetical protein	gene-CWC46_RS01085	-1.1927	0.301759	0.900099	-0.766993	0.454499	0.907018	6.16476	-0.511742	0.39153	1	RefSeq	+	CWC46_RS01085	CWC46_RS01085				Gene				CWC46_01085	Protein Homology	CDS	Genbank:WP_021014012.1	CDS	COORDINATES: similar to AA sequence:RefSeq:WP_017043874.1
NZ_CP025085.1	intergenic	237686	237817		intergenic_NZ_CP025085.1-nt00237686	0.704836	0.607239	1	-0.129087	1	1	6.02042	-0.064694	1	1	SorTnSeq	+	intergenic_NZ_CP025085.1-nt00237686
NZ_CP025085.1	gene	237818	238297	DUF3368 domain-containing protein	gene-CWC46_RS01090	-0.221783	0.84502	1	0.371975	0.596616	0.982124	6.88791	0.178356	0.801308	1	RefSeq	-	CWC46_RS01090	CWC46_RS01090				Gene				CWC46_01090	Protein Homology	CDS	Genbank:WP_021014011.1	CDS	COORDINATES: similar to AA sequence:RefSeq:WP_014980772.1
NZ_CP025085.1	gene	238298	239350	ImmA/IrrE family metallo-endopeptidase	gene-CWC46_RS01095											RefSeq	-	CWC46_RS01095	CWC46_RS01095				Gene				CWC46_01095	Protein Homology	CDS	Genbank:WP_021014010.1	CDS	COORDINATES: similar to AA sequence:RefSeq:WP_011149253.1
NZ_CP025085.1	intergenic	239351	239832		intergenic_NZ_CP025085.1-nt00239351	-0.953022	0.581055	1	-1.07572	0.266847	0.767807	6.29594	0.45323	0.429593	1	SorTnSeq	+	intergenic_NZ_CP025085.1-nt00239351
NZ_CP025085.1	gene	239833	239961	AlpA family phage regulatory protein	gene-CWC46_RS01100											RefSeq	-	CWC46_RS01100	CWC46_RS01100				Gene				CWC46_01100	Protein Homology	CDS	Genbank:WP_021014009.1	CDS	COORDINATES: similar to AA sequence:RefSeq:WP_007146785.1
NZ_CP025085.1	intergenic	239962	240322		intergenic_NZ_CP025085.1-nt00239962	-0.114504	1	1	-0.239369	0.774414	1	5.96886	-0.288916	0.690039	1	SorTnSeq	+	intergenic_NZ_CP025085.1-nt00239962
NZ_CP025085.1	gene	240323	241426	Fic family protein	gene-CWC46_RS01105	0.242819	0.500772	1	0.0133414	1	1	8.48214	0.192474	0.357023	1	RefSeq	+	CWC46_RS01105	CWC46_RS01105				Gene				CWC46_01105	Protein Homology	CDS	Genbank:WP_021014008.1	CDS	COORDINATES: similar to AA sequence:RefSeq:WP_008950216.1
NZ_CP025085.1	intergenic	241427	241547		intergenic_NZ_CP025085.1-nt00241427	-0.305885	0.726563	1	-0.428031	0.726563	1	5.96883	0.567044	0.44207	1	SorTnSeq	+	intergenic_NZ_CP025085.1-nt00241427
NZ_CP025085.1	gene	241548	242798	type II toxin-antitoxin system HipA family toxin	gene-CWC46_RS01110	-0.132627	0.807196	1	-0.932027	0.0518957	0.491337	7.87387	0.114321	0.630005	1	RefSeq	-	CWC46_RS01110	CWC46_RS01110				Gene				CWC46_01110	Protein Homology	CDS	Genbank:WP_021014007.1	CDS	COORDINATES: similar to AA sequence:RefSeq:WP_004249762.1
NZ_CP025085.1	gene	242795	243112	helix-turn-helix domain-containing protein	gene-CWC46_RS01115											RefSeq	-	CWC46_RS01115	CWC46_RS01115				Gene				CWC46_01115	Protein Homology	CDS	Genbank:WP_021014006.1	CDS	COORDINATES: similar to AA sequence:RefSeq:WP_013786790.1
NZ_CP025085.1	intergenic	243113	243530		intergenic_NZ_CP025085.1-nt00243113	-1.33843	0.289063	0.895025	-0.558227	0.753907	1	5.77244	-0.308581	0.663625	1	SorTnSeq	+	intergenic_NZ_CP025085.1-nt00243113
NZ_CP025085.1	gene	243531	244418	nucleotidyl transferase AbiEii/AbiGii toxin family protein	gene-CWC46_RS01120	-0.117193	0.83882	1	-0.245142	1	1	6.9423	0.634095	0.0959267	1	RefSeq	-	CWC46_RS01120	CWC46_RS01120				Gene				CWC46_01120	Protein Homology	CDS	Genbank:WP_021014005.1	CDS	COORDINATES: similar to AA sequence:RefSeq:WP_011494762.1
NZ_CP025085.1	intergenic	244419	244446		intergenic_NZ_CP025085.1-nt00244419											SorTnSeq	+	intergenic_NZ_CP025085.1-nt00244419
NZ_CP025085.1	gene	244447	244971	DUF4095 domain-containing protein	gene-CWC46_RS01125											RefSeq	-	CWC46_RS01125	CWC46_RS01125				Gene				CWC46_01125	Protein Homology	CDS	Genbank:WP_021014004.1	CDS	COORDINATES: similar to AA sequence:RefSeq:WP_007420112.1
NZ_CP025085.1	intergenic	244972	245242		intergenic_NZ_CP025085.1-nt00244972	-4.50337	0.0703128	0.644721	-0.239368	1	1	5.99482	0.114479	1	1	SorTnSeq	+	intergenic_NZ_CP025085.1-nt00244972
NZ_CP025085.1	gene	245243	246415	methyltransferase domain-containing protein	gene-CWC46_RS01130	-0.00449514	1	1	0.0245293	1	1	7.89484	0.0699235	0.869052	1	RefSeq	+	CWC46_RS01130	CWC46_RS01130				Gene				CWC46_01130	Protein Homology	CDS	Genbank:WP_021014003.1	CDS	COORDINATES: similar to AA sequence:RefSeq:WP_017420471.1
NZ_CP025085.1	intergenic	246416	246427		intergenic_NZ_CP025085.1-nt00246416											SorTnSeq	+	intergenic_NZ_CP025085.1-nt00246416
NZ_CP025085.1	gene	246428	247546	hypothetical protein	gene-CWC46_RS01135	-0.263945	0.765993	1	-0.393208	0.551487	0.954912	7.48202	0.253594	0.3952	1	RefSeq	-	CWC46_RS01135	CWC46_RS01135				Gene				CWC46_01135	Protein Homology	CDS	Genbank:WP_021014002.1	CDS	COORDINATES: similar to AA sequence:RefSeq:WP_000006228.1
NZ_CP025085.1	intergenic	247547	247556		intergenic_NZ_CP025085.1-nt00247547											SorTnSeq	+	intergenic_NZ_CP025085.1-nt00247547
NZ_CP025085.1	gene	247557	248561	SEC-C domain-containing protein	gene-CWC46_RS01140	-1.01328	0.0703961	0.644721	-0.826036	0.081429	0.564956	7.55368	-0.344392	0.239096	1	RefSeq	-	CWC46_RS01140	CWC46_RS01140				Gene				CWC46_01140	Protein Homology	CDS	Genbank:WP_021014001.1	CDS	COORDINATES: similar to AA sequence:RefSeq:WP_011621270.1
NZ_CP025085.1	intergenic	248562	248579		intergenic_NZ_CP025085.1-nt00248562											SorTnSeq	+	intergenic_NZ_CP025085.1-nt00248562
NZ_CP025085.1	gene	248580	249929	type II toxin-antitoxin system HipA family toxin	gene-CWC46_RS01145	-0.638721	0.36038	0.934991	-0.956174	0.126292	0.608972	7.34725	-0.0705695	0.92195	1	RefSeq	-	CWC46_RS01145	CWC46_RS01145				Gene				CWC46_01145	Protein Homology	CDS	Genbank:WP_021014000.1	CDS	COORDINATES: similar to AA sequence:RefSeq:WP_017052169.1
NZ_CP025085.1	gene	249919	250209	helix-turn-helix domain-containing protein	gene-CWC46_RS01150											RefSeq	-	CWC46_RS01150	CWC46_RS01150				Gene				CWC46_01150	Protein Homology	CDS	Genbank:WP_037380491.1	CDS	COORDINATES: similar to AA sequence:RefSeq:WP_000673265.1
NZ_CP025085.1	intergenic	250210	250655		intergenic_NZ_CP025085.1-nt00250210											SorTnSeq	+	intergenic_NZ_CP025085.1-nt00250210
NZ_CP025085.1	gene	250656	250988	helix-turn-helix domain-containing protein	gene-CWC46_RS01155	0.954204	0.266847	0.875598	-1.32401	0.726563	1	5.99484	0.481645	0.424358	1	RefSeq	+	CWC46_RS01155	CWC46_RS01155				Gene				CWC46_01155	Protein Homology	CDS	Genbank:WP_021013998.1	CDS	COORDINATES: similar to AA sequence:RefSeq:WP_006686826.1
NZ_CP025085.1	intergenic	250989	251153		intergenic_NZ_CP025085.1-nt00250989											SorTnSeq	+	intergenic_NZ_CP025085.1-nt00250989
NZ_CP025085.1	gene	251154	252551	PLP-dependent aminotransferase family protein	gene-CWC46_RS01160	-0.777814	0.136808	0.738339	-0.378241	0.613977	0.992491	7.622	-0.113791	0.737095	1	RefSeq	-	CWC46_RS01160	CWC46_RS01160				Gene				CWC46_01160	Protein Homology	CDS	Genbank:WP_021013997.1	CDS	COORDINATES: protein motif:HMM:NF012382.1%2CHMM:NF012610.1
NZ_CP025085.1	intergenic	252552	252780		intergenic_NZ_CP025085.1-nt00252552											SorTnSeq	+	intergenic_NZ_CP025085.1-nt00252552
NZ_CP025085.1	gene	252781	254403	ABC transporter substrate-binding protein	gene-CWC46_RS01165	-1.34841	0.0104554	0.339984	-1.12179	0.0396186	0.438943	7.83828	0.123122	0.692768	1	RefSeq	+	CWC46_RS01165	CWC46_RS01165				Gene				CWC46_01165	Protein Homology	CDS	Genbank:WP_021013996.1	CDS	COORDINATES: similar to AA sequence:RefSeq:WP_012765447.1
NZ_CP025085.1	intergenic	254404	254421		intergenic_NZ_CP025085.1-nt00254404											SorTnSeq	+	intergenic_NZ_CP025085.1-nt00254404
NZ_CP025085.1	gene	254422	255363	ABC transporter permease	gene-CWC46_RS01170	-0.39916	0.607593	1	-0.744632	0.39153	0.875508	6.8879	-0.479264	0.221553	1	RefSeq	+	CWC46_RS01170	CWC46_RS01170				Gene				CWC46_01170	Protein Homology	CDS	Genbank:WP_021013995.1	CDS	COORDINATES: similar to AA sequence:RefSeq:WP_012765448.1
NZ_CP025085.1	intergenic	255364	255391		intergenic_NZ_CP025085.1-nt00255364											SorTnSeq	+	intergenic_NZ_CP025085.1-nt00255364
NZ_CP025085.1	gene	255392	256264	ABC transporter permease	gene-CWC46_RS01175	-1.33084	0.151591	0.7508	-1.05991	0.168639	0.676331	6.8878	0.25338	0.556001	1	RefSeq	+	CWC46_RS01175	CWC46_RS01175				Gene				CWC46_01175	Protein Homology	CDS	Genbank:WP_021013994.1	CDS	COORDINATES: similar to AA sequence:RefSeq:WP_009110904.1
NZ_CP025085.1	intergenic	256265	256287		intergenic_NZ_CP025085.1-nt00256265											SorTnSeq	+	intergenic_NZ_CP025085.1-nt00256265
NZ_CP025085.1	gene	256288	257958	ABC transporter ATP-binding protein	gene-CWC46_RS01180	-0.740354	0.105346	0.716354	-1.24333	0.00855515	0.234197	8.02644	-0.0549715	0.881879	1	RefSeq	+	CWC46_RS01180	CWC46_RS01180				Gene				CWC46_01180	Protein Homology	CDS	Genbank:WP_021013993.1	CDS	COORDINATES: similar to AA sequence:RefSeq:WP_012765450.1
NZ_CP025085.1	intergenic	257959	258025		intergenic_NZ_CP025085.1-nt00257959	-0.767803	0.548829	1	-0.341815	0.774414	1	6.04545	-0.0804951	1	1	SorTnSeq	+	intergenic_NZ_CP025085.1-nt00257959
NZ_CP025085.1	gene	258026	259498	amidase	gene-CWC46_RS01185	-0.991121	0.0703961	0.644721	-0.803871	0.140898	0.636147	7.77971	0.25953	0.32559	1	RefSeq	+	CWC46_RS01185	CWC46_RS01185				Gene				CWC46_01185	Protein Homology	CDS	Genbank:WP_084297620.1	CDS	COORDINATES: similar to AA sequence:RefSeq:WP_012765451.1
NZ_CP025085.1	intergenic	259499	259625		intergenic_NZ_CP025085.1-nt00259499											SorTnSeq	+	intergenic_NZ_CP025085.1-nt00259499
NZ_CP025085.1	gene	259626	260009	response regulator	gene-CWC46_RS01190	-0.953022	0.581055	1	-0.130685	1	1	6.31673	0.39528	0.429593	1	RefSeq	-	CWC46_RS01190	CWC46_RS01190				Gene				CWC46_01190	Protein Homology	CDS	Genbank:WP_021013991.1	CDS	COORDINATES: protein motif:HMM:NF012301.1
NZ_CP025085.1	intergenic	260010	260010		intergenic_NZ_CP025085.1-nt00260010											SorTnSeq	+	intergenic_NZ_CP025085.1-nt00260010
NZ_CP025085.1	gene	260011	261471	PAS domain-containing sensor histidine kinase	gene-CWC46_RS01195	-0.44675	0.418758	0.975577	0.203453	0.712233	1	7.66324	-0.088467	0.78775	1	RefSeq	-	CWC46_RS01195	CWC46_RS01195				Gene				CWC46_01195	Protein Homology	CDS	Genbank:WP_021013990.1	CDS	COORDINATES: similar to AA sequence:RefSeq:WP_014812659.1
NZ_CP025085.1	intergenic	261472	261491		intergenic_NZ_CP025085.1-nt00261472											SorTnSeq	+	intergenic_NZ_CP025085.1-nt00261472
NZ_CP025085.1	gene	261492	262160	GvpL/GvpF family gas vesicle protein	gene-CWC46_RS01200	-0.781943	0.480683	0.99597	-0.90725	0.480683	0.922363	6.56244	0.419494	0.331753	1	RefSeq	-	CWC46_RS01200	CWC46_RS01200				Gene				CWC46_01200	Protein Homology	CDS	Genbank:WP_021013989.1	CDS	COORDINATES: protein motif:HMM:NF018129.1
NZ_CP025085.1	gene	262157	262945	GvpL/GvpF family gas vesicle protein	gene-CWC46_RS01205	0.0554496	1	1	0.333124	0.701109	1	6.77245	0.418076	0.358147	1	RefSeq	-	CWC46_RS01205	CWC46_RS01205				Gene				CWC46_01205	Protein Homology	CDS	Genbank:WP_021013988.1	CDS	COORDINATES: protein motif:HMM:NF018129.1
NZ_CP025085.1	gene	262942	265104	CDC48 family AAA ATPase	gene-CWC46_RS01210	-0.818085	0.0329491	0.539962	-0.12381	0.722792	1	8.60091	-0.0413958	0.853563	1	RefSeq	-	CWC46_RS01210	CWC46_RS01210				Gene				CWC46_01210	Protein Homology	CDS	Genbank:WP_021013987.1	CDS	COORDINATES: similar to AA sequence:RefSeq:WP_020507567.1
NZ_CP025085.1	intergenic	265105	265111		intergenic_NZ_CP025085.1-nt00265105											SorTnSeq	+	intergenic_NZ_CP025085.1-nt00265105
NZ_CP025085.1	gene	265112	265594	Hsp20/alpha crystallin family protein	gene-CWC46_RS01215	0.725063	0.507813	1	-3.68895	0.125	0.608972	5.74206	0.683892	0.503446	1	RefSeq	-	CWC46_RS01215	CWC46_RS01215				Gene				CWC46_01215	Protein Homology	CDS	Genbank:WP_021013986.1	CDS	COORDINATES: similar to AA sequence:RefSeq:WP_009915629.1
NZ_CP025085.1	intergenic	265595	265609		intergenic_NZ_CP025085.1-nt00265595											SorTnSeq	+	intergenic_NZ_CP025085.1-nt00265595
NZ_CP025085.1	gene	265610	267034	sigma-54-dependent Fis family transcriptional regulator	gene-CWC46_RS01220	0.409567	0.0506331	0.626631	0.370393	0.0719026	0.539882	9.63491	0.159694	0.216365	1	RefSeq	-	CWC46_RS01220	CWC46_RS01220				Gene				CWC46_01220	Protein Homology	CDS	Genbank:WP_021013985.1	CDS	COORDINATES: protein motif:HMM:NF012301.1%2CHMM:NF014950.1%2CHMM:NF025885.1
NZ_CP025085.1	intergenic	267035	267964		intergenic_NZ_CP025085.1-nt00267035	0.608613	0.00265824	0.168936	0.403853	0.0540755	0.493457	9.54772	0.176342	0.182823	1	SorTnSeq	+	intergenic_NZ_CP025085.1-nt00267035
NZ_CP025085.1	gene	267965	268543	hypothetical protein	gene-CWC46_RS01225	0.215292	0.48803	1	0.196668	0.497572	0.937974	8.77627	0.123499	0.512529	1	RefSeq	-	CWC46_RS01225	CWC46_RS01225				Gene				CWC46_01225	GeneMarkS-2+	CDS	Genbank:WP_021013984.1	CDS	COORDINATES: ab initio prediction:GeneMarkS-2+
NZ_CP025085.1	intergenic	268544	268557		intergenic_NZ_CP025085.1-nt00268544											SorTnSeq	+	intergenic_NZ_CP025085.1-nt00268544
NZ_CP025085.1	gene	268558	268890	gas vesicle protein	gene-CWC46_RS01230	-0.315837	1	1	-1.38738	0.210114	0.718687	6.35738	-0.0438246	1	1	RefSeq	-	CWC46_RS01230	CWC46_RS01230				Gene				CWC46_01230	Protein Homology	CDS	Genbank:WP_021013983.1	CDS	COORDINATES: similar to AA sequence:RefSeq:WP_006871727.1
NZ_CP025085.1	intergenic	268891	269229		intergenic_NZ_CP025085.1-nt00268891	-1.24273	0.0470321	0.610569	-1.37044	0.0335533	0.426788	7.10626	-0.477521	0.132906	1	SorTnSeq	+	intergenic_NZ_CP025085.1-nt00268891
NZ_CP025085.1	gene	269230	269493	tetratricopeptide repeat protein	gene-CWC46_RS01240	-0.767803	0.774414	1	-1.78635	0.109375	0.608972	6.16471	0.460113	0.405034	1	RefSeq	-	CWC46_RS01240	CWC46_RS01240				Gene				CWC46_01240	Protein Homology	CDS	Genbank:WP_021013982.1	CDS	COORDINATES: protein motif:HMM:NF024572.1
NZ_CP025085.1	intergenic	269494	269581		intergenic_NZ_CP025085.1-nt00269494											SorTnSeq	+	intergenic_NZ_CP025085.1-nt00269494
NZ_CP025085.1	gene	269582	269929	gas vesicle protein K	gene-CWC46_RS01245	0.0690814	1	1	-0.765783	0.632203	0.999559	6.47287	0.3197	0.560851	1	RefSeq	-	CWC46_RS01245	CWC46_RS01245				Gene				CWC46_01245	Protein Homology	CDS	Genbank:WP_021013981.1	CDS	COORDINATES: similar to AA sequence:RefSeq:WP_014814036.1
NZ_CP025085.1	intergenic	269930	269933		intergenic_NZ_CP025085.1-nt00269930											SorTnSeq	+	intergenic_NZ_CP025085.1-nt00269930
NZ_CP025085.1	gene	269934	270131	gas vesicle protein	gene-CWC46_RS01250	-4.60573	0.0703128	0.644721	-1.78635	0.109375	0.608972	5.80216	-0.646903	0.307458	1	RefSeq	-	CWC46_RS01250	CWC46_RS01250				Gene				CWC46_01250	Protein Homology	CDS	Genbank:WP_021013980.1	CDS	COORDINATES: similar to AA sequence:RefSeq:WP_006871725.1
NZ_CP025085.1	intergenic	270132	270149		intergenic_NZ_CP025085.1-nt00270132											SorTnSeq	+	intergenic_NZ_CP025085.1-nt00270132
NZ_CP025085.1	gene	270150	272063	ArsA family ATPase	gene-CWC46_RS01255	-0.268673	0.538399	1	-0.207671	0.69083	1	8.36231	0.0543112	0.839053	1	RefSeq	-	CWC46_RS01255	CWC46_RS01255				Gene				CWC46_01255	Protein Homology	CDS	Genbank:WP_021013979.1	CDS	COORDINATES: protein motif:HMM:NF014433.1
NZ_CP025085.1	gene	272060	272476	hypothetical protein	gene-CWC46_RS01260	-0.847236	0.480683	0.99597	-5.26266	0.00341802	0.149709	6.49117	0.261534	0.575852	1	RefSeq	-	CWC46_RS01260	CWC46_RS01260				Gene				CWC46_01260	Protein Homology	CDS	Genbank:WP_021013978.1	CDS	COORDINATES: similar to AA sequence:RefSeq:WP_007259998.1
NZ_CP025085.1	intergenic	272477	272485		intergenic_NZ_CP025085.1-nt00272477	0.642768	0.774414	1	0.827685	0.423951	0.895847	5.96891	0.0782508	1	1	SorTnSeq	+	intergenic_NZ_CP025085.1-nt00272477
NZ_CP025085.1	gene	272486	273307	GvpL/GvpF family gas vesicle protein	gene-CWC46_RS01265	-0.508108	0.222884	0.835947	-0.364787	0.324485	0.819675	8.38701	-0.0300091	0.894437	1	RefSeq	-	CWC46_RS01265	CWC46_RS01265				Gene				CWC46_01265	Protein Homology	CDS	Genbank:WP_084297577.1	CDS	COORDINATES: protein motif:HMM:NF018129.1
NZ_CP025085.1	intergenic	273308	273502		intergenic_NZ_CP025085.1-nt00273308	-0.170435	1	1	0.423344	0.473131	0.921564	6.81686	0.0622107	0.895684	1	SorTnSeq	+	intergenic_NZ_CP025085.1-nt00273308
NZ_CP025085.1	gene	273503	273820	hypothetical protein	gene-CWC46_RS01270	0.128946	0.889885	1	-0.344225	0.671813	1	7.53619	0.121939	0.706886	1	RefSeq	-	CWC46_RS01270	CWC46_RS01270				Gene				CWC46_01270	GeneMarkS-2+	CDS	Genbank:WP_021013975.1	CDS	COORDINATES: ab initio prediction:GeneMarkS-2+
NZ_CP025085.1	intergenic	273821	273825		intergenic_NZ_CP025085.1-nt00273821											SorTnSeq	+	intergenic_NZ_CP025085.1-nt00273821
NZ_CP025085.1	gene	273826	274815	gas vesicle protein GvpN	gene-CWC46_RS01275	-0.302771	0.620148	1	-0.776025	0.123734	0.608972	7.88077	0.184218	0.471295	1	RefSeq	-	gvpN	CWC46_RS01275				Gene	gvpN			CWC46_01275	Protein Homology	CDS	Genbank:WP_021013974.1	CDS	COORDINATES: similar to AA sequence:RefSeq:WP_010109836.1
NZ_CP025085.1	intergenic	274816	275042		intergenic_NZ_CP025085.1-nt00274816	-0.271366	0.557198	1	-1.91058	0.0524795	0.491337	6.80211	0.167448	0.712233	1	SorTnSeq	+	intergenic_NZ_CP025085.1-nt00274816
NZ_CP025085.1	gene	275043	275276	hypothetical protein	gene-CWC46_RS01280	-0.114503	1	1	-0.239369	0.774414	1	5.91543	-0.542703	0.404874	1	RefSeq	-	CWC46_RS01280	CWC46_RS01280				Gene				CWC46_01280	GeneMarkS-2+	CDS	Genbank:WP_157831354.1	CDS	COORDINATES: ab initio prediction:GeneMarkS-2+
NZ_CP025085.1	intergenic	275277	275371		intergenic_NZ_CP025085.1-nt00275277											SorTnSeq	+	intergenic_NZ_CP025085.1-nt00275277
NZ_CP025085.1	gene	275372	275866	hypothetical protein	gene-CWC46_RS01285	-0.527362	0.557198	1	-0.965543	0.229524	0.731718	6.74202	-0.0396046	1	1	RefSeq	-	CWC46_RS01285	CWC46_RS01285				Gene				CWC46_01285	GeneMarkS-2+	CDS	Genbank:WP_021013973.1	CDS	COORDINATES: ab initio prediction:GeneMarkS-2+
NZ_CP025085.1	intergenic	275867	275965		intergenic_NZ_CP025085.1-nt00275867	-0.953022	0.581055	1	-0.130685	1	1	6.23186	0.136952	0.86794	1	SorTnSeq	+	intergenic_NZ_CP025085.1-nt00275867
NZ_CP025085.1	gene	275966	276184	gas vesicle structural protein GvpA	gene-CWC46_RS01290	0.30179	0.855536	1	-0.654863	0.557198	0.957887	6.77247	-0.179788	0.694006	1	RefSeq	-	gvpA	CWC46_RS01290				Gene	gvpA			CWC46_01290	Protein Homology	CDS	Genbank:WP_021013972.1	CDS	COORDINATES: similar to AA sequence:RefSeq:WP_020503491.1
NZ_CP025085.1	intergenic	276185	276946		intergenic_NZ_CP025085.1-nt00276185	-0.119056	0.817556	1	-0.249149	0.566577	0.968392	7.96884	-0.109447	0.692768	1	SorTnSeq	+	intergenic_NZ_CP025085.1-nt00276185
NZ_CP025085.1	gene	276947	277711	4'-phosphopantetheinyl transferase superfamily protein	gene-CWC46_RS01295	-0.710228	0.45826	0.982097	-0.837795	0.184935	0.68696	6.88785	-0.01687	1	1	RefSeq	-	CWC46_RS01295	CWC46_RS01295				Gene				CWC46_01295	Protein Homology	CDS	Genbank:WP_021013971.1	CDS	COORDINATES: similar to AA sequence:RefSeq:WP_016941551.1
NZ_CP025085.1	intergenic	277712	278043		intergenic_NZ_CP025085.1-nt00277712	-0.565721	0.610156	1	0.99289	0.11244	0.608972	6.35747	-0.260043	0.740569	1	SorTnSeq	+	intergenic_NZ_CP025085.1-nt00277712
NZ_CP025085.1	gene	278044	278751	ABC transporter ATP-binding protein	gene-CWC46_RS01300	0.298631	0.602926	1	-1.30913	0.0356989	0.427115	7.49124	-0.155069	0.633761	1	RefSeq	-	CWC46_RS01300	CWC46_RS01300				Gene				CWC46_01300	Protein Homology	CDS	Genbank:WP_021013970.1	CDS	COORDINATES: similar to AA sequence:RefSeq:WP_019844156.1
NZ_CP025085.1	intergenic	278752	278767		intergenic_NZ_CP025085.1-nt00278752											SorTnSeq	+	intergenic_NZ_CP025085.1-nt00278752
NZ_CP025085.1	gene	278768	279004	hypothetical protein	gene-CWC46_RS22765	-0.147812	0.824315	1	-0.277966	0.505241	0.937974	8.10627	0.0104917	1	1	RefSeq	+	CWC46_RS22765	CWC46_RS22765				Gene					GeneMarkS-2+	CDS	Genbank:WP_157831355.1	CDS	COORDINATES: ab initio prediction:GeneMarkS-2+
NZ_CP025085.1	intergenic	279005	279434		intergenic_NZ_CP025085.1-nt00279005	0.241097	0.542615	1	0.30888	0.37295	0.864496	8.27511	-0.0603109	0.77118	1	SorTnSeq	+	intergenic_NZ_CP025085.1-nt00279005
NZ_CP025085.1	gene	279435	279992	helix-turn-helix transcriptional regulator	gene-CWC46_RS01310	-0.134231	0.592263	1	0.272452	0.171516	0.683602	9.51181	-0.0456674	0.7504	1	RefSeq	+	CWC46_RS01310	CWC46_RS01310				Gene				CWC46_01310	Protein Homology	CDS	Genbank:WP_021013968.1	CDS	COORDINATES: similar to AA sequence:RefSeq:WP_012763736.1
NZ_CP025085.1	intergenic	279993	280469		intergenic_NZ_CP025085.1-nt00279993	-0.762357	0.310507	0.900935	-0.318233	0.417695	0.895847	7.43526	0.625918	0.0293046	1	SorTnSeq	+	intergenic_NZ_CP025085.1-nt00279993
NZ_CP025085.1	gene	280470	281822	argininosuccinate synthase	gene-CWC46_RS01315	-0.0045075	1	1	-0.440927	0.184291	0.68696	8.39685	0.0361927	0.8935	1	RefSeq	-	argG	CWC46_RS01315				Gene	argG			CWC46_01315	Protein Homology	CDS	Genbank:WP_021013967.1	CDS	COORDINATES: similar to AA sequence:RefSeq:WP_015842235.1
NZ_CP025085.1	intergenic	281823	282385		intergenic_NZ_CP025085.1-nt00281823	0.100152	1	1	0.327152	0.584666	0.971935	6.7574	-0.0242383	1	1	SorTnSeq	+	intergenic_NZ_CP025085.1-nt00281823
NZ_CP025085.1	gene	282386	282961	DJ-1/PfpI family protein	gene-CWC46_RS01320	-0.909701	0.359285	0.934991	0.144554	1	1	6.6304	0.19839	0.677811	1	RefSeq	+	CWC46_RS01320	CWC46_RS01320				Gene				CWC46_01320	Protein Homology	CDS	Genbank:WP_021013966.1	CDS	COORDINATES: similar to AA sequence:RefSeq:WP_005968059.1
NZ_CP025085.1	intergenic	282962	283008		intergenic_NZ_CP025085.1-nt00282962											SorTnSeq	+	intergenic_NZ_CP025085.1-nt00282962
NZ_CP025085.1	gene	283009	284193	XylR family transcriptional regulator	gene-CWC46_RS01325	-0.23235	0.694006	1	-0.362047	0.511846	0.939907	7.67122	-0.0252389	0.929615	1	RefSeq	-	CWC46_RS01325	CWC46_RS01325				Gene				CWC46_01325	Protein Homology	CDS	Genbank:WP_021013965.1	CDS	COORDINATES: similar to AA sequence:RefSeq:WP_012763724.1
NZ_CP025085.1	intergenic	284194	284311		intergenic_NZ_CP025085.1-nt00284194											SorTnSeq	+	intergenic_NZ_CP025085.1-nt00284194
NZ_CP025085.1	gene	284312	285496	sugar ABC transporter permease	gene-CWC46_RS01330	-1.0778	0.0580659	0.639996	-0.313266	0.538586	0.954912	7.76478	-0.0215338	1	1	RefSeq	-	CWC46_RS01330	CWC46_RS01330				Gene				CWC46_01330	Protein Homology	CDS	Genbank:WP_021013964.1	CDS	COORDINATES: similar to AA sequence:RefSeq:WP_005968064.1
NZ_CP025085.1	gene	285474	287015	xylose ABC transporter ATP-binding protein	gene-CWC46_RS01335	-0.443891	0.308173	0.900935	-0.405573	0.320299	0.81647	8.13569	0.0471826	0.941887	1	RefSeq	-	CWC46_RS01335	CWC46_RS01335				Gene				CWC46_01335	Protein Homology	CDS	Genbank:WP_021013963.1	CDS	COORDINATES: similar to AA sequence:RefSeq:WP_014913700.1
NZ_CP025085.1	intergenic	287016	287222		intergenic_NZ_CP025085.1-nt00287016	-0.402088	1	1	1.15723	0.133802	0.624108	6.45432	0.395279	0.429593	1	SorTnSeq	+	intergenic_NZ_CP025085.1-nt00287016
NZ_CP025085.1	gene	287223	288221	D-xylose ABC transporter substrate-binding protein	gene-CWC46_RS01340	0.367711	0.0864278	0.694008	0.359037	0.0637561	0.526908	9.66565	0.0164094	0.96503	1	RefSeq	-	xylF	CWC46_RS01340				Gene	xylF			CWC46_01340	Protein Homology	CDS	Genbank:WP_021013962.1	CDS	COORDINATES: similar to AA sequence:RefSeq:WP_010284189.1
NZ_CP025085.1	intergenic	288222	288697		intergenic_NZ_CP025085.1-nt00288222	0.273658	0.258096	0.875598	0.271767	0.240271	0.750875	9.44991	0.0333735	0.851286	1	SorTnSeq	+	intergenic_NZ_CP025085.1-nt00288222
NZ_CP025085.1	gene	288698	290017	xylose isomerase	gene-CWC46_RS01345	0.0172175	1	1	0.148692	0.536606	0.954912	9.2987	-0.00972981	0.960906	1	RefSeq	+	xylA	CWC46_RS01345				Gene	xylA			CWC46_01345	Protein Homology	CDS	Genbank:WP_021013961.1	CDS	COORDINATES: similar to AA sequence:RefSeq:WP_008457657.1
NZ_CP025085.1	intergenic	290018	290312		intergenic_NZ_CP025085.1-nt00290018	-0.356165	0.627104	1	-0.890527	0.121451	0.608972	7.23178	0.186758	0.534065	1	SorTnSeq	+	intergenic_NZ_CP025085.1-nt00290018
NZ_CP025085.1	gene	290313	291770	xylulokinase	gene-CWC46_RS01355	-1.17997	0.0488754	0.623802	-0.325015	0.44263	0.907018	7.68717	-0.0121191	1	1	RefSeq	+	xylB	CWC46_RS01355				Gene	xylB			CWC46_01355	Protein Homology	CDS	Genbank:WP_021013960.1	CDS	COORDINATES: similar to AA sequence:RefSeq:WP_013320025.1
NZ_CP025085.1	intergenic	291771	291992		intergenic_NZ_CP025085.1-nt00291771											SorTnSeq	+	intergenic_NZ_CP025085.1-nt00291771
NZ_CP025085.1	gene	291993	292544	isochorismatase family protein	gene-CWC46_RS01360	-0.0887638	1	1	-0.611617	0.607239	0.986286	6.25357	-0.0212036	1	1	RefSeq	+	CWC46_RS01360	CWC46_RS01360				Gene				CWC46_01360	Protein Homology	CDS	Genbank:WP_021013959.1	CDS	COORDINATES: similar to AA sequence:RefSeq:WP_004950705.1
NZ_CP025085.1	intergenic	292545	292551		intergenic_NZ_CP025085.1-nt00292545											SorTnSeq	+	intergenic_NZ_CP025085.1-nt00292545
NZ_CP025085.1	gene	292552	293478	helix-turn-helix domain-containing protein	gene-CWC46_RS01365	-2.41089	0.00332702	0.184156	-1.02301	0.143309	0.636147	7.24259	0.132405	0.69083	1	RefSeq	+	CWC46_RS01365	CWC46_RS01365				Gene				CWC46_01365	Protein Homology	CDS	Genbank:WP_021013958.1	CDS	COORDINATES: similar to AA sequence:RefSeq:WP_016929557.1
NZ_CP025085.1	intergenic	293479	293480		intergenic_NZ_CP025085.1-nt00293479											SorTnSeq	+	intergenic_NZ_CP025085.1-nt00293479
NZ_CP025085.1	gene	293481	294473	acyltransferase	gene-CWC46_RS01370	-0.224325	0.677811	1	-0.929304	0.15241	0.647294	7.50929	-0.0820449	0.778879	1	RefSeq	-	CWC46_RS01370	CWC46_RS01370				Gene				CWC46_01370	Protein Homology	CDS	Genbank:WP_021013957.1	CDS	COORDINATES: similar to AA sequence:RefSeq:WP_015842243.1
NZ_CP025085.1	intergenic	294474	294652		intergenic_NZ_CP025085.1-nt00294474	-2.16697	0.0573735	0.639208	-0.131663	1	1	6.41626	0.137515	0.880397	1	SorTnSeq	+	intergenic_NZ_CP025085.1-nt00294474
NZ_CP025085.1	gene	294653	296191	aldehyde dehydrogenase	gene-CWC46_RS01375	-1.14902	0.0087724	0.317889	-0.657957	0.0856925	0.584869	8.24245	0.0609481	0.783115	1	RefSeq	-	CWC46_RS01375	CWC46_RS01375				Gene				CWC46_01375	Protein Homology	CDS	Genbank:WP_021013956.1	CDS	COORDINATES: similar to AA sequence:RefSeq:WP_001551836.1
NZ_CP025085.1	intergenic	296192	296549		intergenic_NZ_CP025085.1-nt00296192	-0.486481	0.790528	1	-1.16017	0.423951	0.895847	6.29596	0.249266	0.63583	1	SorTnSeq	+	intergenic_NZ_CP025085.1-nt00296192
NZ_CP025085.1	gene	296550	297341	formate dehydrogenase accessory sulfurtransferase FdhD	gene-CWC46_RS01380	0.339275	0.560067	1	-0.418719	0.643971	1	7.38712	0.164571	0.687889	1	RefSeq	+	fdhD	CWC46_RS01380				Gene	fdhD			CWC46_01380	Protein Homology	CDS	Genbank:WP_021013955.1	CDS	COORDINATES: similar to AA sequence:RefSeq:WP_016941576.1
NZ_CP025085.1	intergenic	297342	297566		intergenic_NZ_CP025085.1-nt00297342											SorTnSeq	+	intergenic_NZ_CP025085.1-nt00297342
NZ_CP025085.1	gene	297567	298193	superoxide dismutase [Mn]	gene-CWC46_RS01385											RefSeq	+	sodA	CWC46_RS01385				Gene	sodA			CWC46_01385	Protein Homology	CDS	Genbank:WP_021013954.1	CDS	COORDINATES: similar to AA sequence:RefSeq:WP_020303540.1
NZ_CP025085.1	intergenic	298194	298488		intergenic_NZ_CP025085.1-nt00298194	0.196451	0.731011	1	0.757173	0.0297684	0.406618	8.19884	0.354474	0.11524	1	SorTnSeq	+	intergenic_NZ_CP025085.1-nt00298194
NZ_CP025085.1	gene	298489	300381	HAMP domain-containing protein	gene-CWC46_RS01395	-0.253296	0.344166	0.928106	-0.32656	0.160443	0.668202	9.51359	0.108365	0.402055	1	RefSeq	+	CWC46_RS01395	CWC46_RS01395				Gene				CWC46_01395	Protein Homology	CDS	Genbank:WP_021013952.1	CDS	COORDINATES: similar to AA sequence:RefSeq:WP_012882815.1
NZ_CP025085.1	intergenic	300382	301153		intergenic_NZ_CP025085.1-nt00300382	0.336134	0.0762094	0.665786	0.536266	0.002723	0.134468	9.8553	-0.054373	0.679337	1	SorTnSeq	+	intergenic_NZ_CP025085.1-nt00300382
NZ_CP025085.1	gene	301154	301516	YibL family ribosome-associated protein	gene-CWC46_RS01400	0.400551	0.67764	1	-2.35178	0.0351566	0.427115	6.27497	-0.653636	0.242987	1	RefSeq	-	CWC46_RS01400	CWC46_RS01400				Gene				CWC46_01400	Protein Homology	CDS	Genbank:WP_021013951.1	CDS	COORDINATES: similar to AA sequence:RefSeq:WP_015842248.1
NZ_CP025085.1	intergenic	301517	301652		intergenic_NZ_CP025085.1-nt00301517	0.704835	0.790528	1	0.578074	0.607239	0.986286	6.14174	0.226796	0.850555	1	SorTnSeq	+	intergenic_NZ_CP025085.1-nt00301517
NZ_CP025085.1	gene	301653	302183	MltR family transcriptional regulator	gene-CWC46_RS01405	-0.713555	0.454499	0.982097	-0.131663	1	1	6.57975	0.488698	0.262441	1	RefSeq	-	CWC46_RS01405	CWC46_RS01405				Gene				CWC46_01405	Protein Homology	CDS	Genbank:WP_021013950.1	CDS	COORDINATES: similar to AA sequence:RefSeq:WP_014913691.1
NZ_CP025085.1	intergenic	302184	302328		intergenic_NZ_CP025085.1-nt00302184	0.3934	1	1	-1.57362	0.179688	0.683602	6.02038	0.226796	0.850555	1	SorTnSeq	+	intergenic_NZ_CP025085.1-nt00302184
NZ_CP025085.1	gene	302329	303477	mannitol-1-phosphate 5-dehydrogenase	gene-CWC46_RS01410	-0.384225	0.823803	1	-5.19733	0.00341802	0.149709	6.29596	-0.247965	0.75523	1	RefSeq	-	CWC46_RS01410	CWC46_RS01410				Gene				CWC46_01410	Protein Homology	CDS	Genbank:WP_037381046.1	CDS	COORDINATES: similar to AA sequence:RefSeq:WP_015842250.1
NZ_CP025085.1	intergenic	303478	303537		intergenic_NZ_CP025085.1-nt00303478											SorTnSeq	+	intergenic_NZ_CP025085.1-nt00303478
NZ_CP025085.1	gene	303538	305448	PTS mannitol transporter subunit IICBA	gene-CWC46_RS01415	-0.483792	0.479891	0.99597	-0.239895	0.683491	1	7.73423	0.400659	0.12653	1	RefSeq	-	CWC46_RS01415	CWC46_RS01415				Gene				CWC46_01415	Protein Homology	CDS	Genbank:WP_021013948.1	CDS	COORDINATES: similar to AA sequence:RefSeq:WP_011091730.1
NZ_CP025085.1	intergenic	305449	305940		intergenic_NZ_CP025085.1-nt00305449	0.155435	0.84502	1	-0.189835	0.83882	1	6.63047	-0.179422	0.887726	1	SorTnSeq	+	intergenic_NZ_CP025085.1-nt00305449
NZ_CP025085.1	gene	305941	306651	DUF3053 domain-containing protein	gene-CWC46_RS01420	-0.550545	0.348891	0.931447	0.0100023	1	1	7.40659	0.0955005	0.8439	1	RefSeq	-	CWC46_RS01420	CWC46_RS01420				Gene				CWC46_01420	Protein Homology	CDS	Genbank:WP_021013947.1	CDS	COORDINATES: similar to AA sequence:RefSeq:WP_012763712.1
NZ_CP025085.1	intergenic	306652	307261		intergenic_NZ_CP025085.1-nt00306652	-0.138082	1	1	-1.52113	0.143464	0.636147	6.56247	0.261534	0.575852	1	SorTnSeq	+	intergenic_NZ_CP025085.1-nt00306652
NZ_CP025085.1	gene	307262	308317	ABC transporter substrate-binding protein	gene-CWC46_RS01425	-0.0812176	1	1	-0.210218	0.871415	1	7.32696	0.496819	0.129297	1	RefSeq	+	CWC46_RS01425	CWC46_RS01425				Gene				CWC46_01425	Protein Homology	CDS	Genbank:WP_037381043.1	CDS	COORDINATES: similar to AA sequence:RefSeq:WP_008104639.1
NZ_CP025085.1	intergenic	308318	308332		intergenic_NZ_CP025085.1-nt00308318											SorTnSeq	+	intergenic_NZ_CP025085.1-nt00308318
NZ_CP025085.1	gene	308333	309145	ABC transporter permease	gene-CWC46_RS01430	-0.966451	0.364178	0.940218	0.0894562	0.847137	1	6.54503	-0.176837	0.776321	1	RefSeq	+	CWC46_RS01430	CWC46_RS01430				Gene				CWC46_01430	Protein Homology	CDS	Genbank:WP_021013945.1	CDS	COORDINATES: similar to AA sequence:RefSeq:WP_009638850.1
NZ_CP025085.1	intergenic	309146	309157		intergenic_NZ_CP025085.1-nt00309146											SorTnSeq	+	intergenic_NZ_CP025085.1-nt00309146
NZ_CP025085.1	gene	309158	309934	ABC transporter ATP-binding protein	gene-CWC46_RS01435	-1.02166	0.24779	0.861321	0.139442	0.86794	1	6.99481	0.129727	0.815123	1	RefSeq	+	CWC46_RS01435	CWC46_RS01435				Gene				CWC46_01435	Protein Homology	CDS	Genbank:WP_021013944.1	CDS	COORDINATES: similar to AA sequence:RefSeq:WP_019844183.1
NZ_CP025085.1	intergenic	309935	309948		intergenic_NZ_CP025085.1-nt00309935											SorTnSeq	+	intergenic_NZ_CP025085.1-nt00309935
NZ_CP025085.1	gene	309949	310668	urea carboxylase-associated family protein	gene-CWC46_RS01440	-1.8555	0.226563	0.835947	-1.07572	0.581055	0.971935	6.09433	-0.0925467	1	1	RefSeq	+	CWC46_RS01440	CWC46_RS01440				Gene				CWC46_01440	Protein Homology	CDS	Genbank:WP_021013943.1	CDS	COORDINATES: similar to AA sequence:RefSeq:WP_013320039.1
NZ_CP025085.1	intergenic	310669	310670		intergenic_NZ_CP025085.1-nt00310669											SorTnSeq	+	intergenic_NZ_CP025085.1-nt00310669
NZ_CP025085.1	gene	310671	311306	DUF1989 domain-containing protein	gene-CWC46_RS01445	-1.46064	0.143464	0.738339	-1.03507	0.237886	0.745168	6.39688	-0.242206	0.65159	1	RefSeq	+	CWC46_RS01445	CWC46_RS01445				Gene				CWC46_01445	Protein Homology	CDS	Genbank:WP_021013942.1	CDS	COORDINATES: similar to AA sequence:RefSeq:WP_012882806.1
NZ_CP025085.1	intergenic	311307	311396		intergenic_NZ_CP025085.1-nt00311307	-4.14381	0.21875	0.835947	0.120522	1	1	5.74207	-0.175537	0.823803	1	SorTnSeq	+	intergenic_NZ_CP025085.1-nt00311307
NZ_CP025085.1	gene	311397	315023	urea carboxylase	gene-CWC46_RS01450	-0.427496	0.224638	0.835947	-0.987938	0.00288869	0.139392	8.80917	0.113449	0.57683	1	RefSeq	+	uca	CWC46_RS01450				Gene	uca			CWC46_01450	Protein Homology	CDS	Genbank:WP_021013941.1	CDS	COORDINATES: similar to AA sequence:RefSeq:WP_012767828.1
NZ_CP025085.1	intergenic	315024	315349		intergenic_NZ_CP025085.1-nt00315024	-0.909701	0.359285	0.934991	-0.0724227	1	1	6.43543	-0.377144	0.451383	1	SorTnSeq	+	intergenic_NZ_CP025085.1-nt00315024
NZ_CP025085.1	gene	315350	316570	DeoR family transcriptional regulator	gene-CWC46_RS01455	0.140426	0.487205	1	0.261824	0.135718	0.624108	10.1037	0.0378158	0.795886	1	RefSeq	+	CWC46_RS01455	CWC46_RS01455				Gene				CWC46_01455	Protein Homology	CDS	Genbank:WP_021013939.1	CDS	COORDINATES: protein motif:HMM:NF012515.1%2CHMM:NF019826.1
NZ_CP025085.1	intergenic	316571	316640		intergenic_NZ_CP025085.1-nt00316571	0.512703	0.774414	1	-0.00967444	1	1	6.04548	0.3486	0.701109	1	SorTnSeq	+	intergenic_NZ_CP025085.1-nt00316571
NZ_CP025085.1	gene	316641	317591	tripartite tricarboxylate transporter substrate binding protein	gene-CWC46_RS01460	0.0602156	0.748837	1	0.398024	0.0164285	0.317138	10.1407	0.0259737	0.797768	1	RefSeq	+	CWC46_RS01460	CWC46_RS01460				Gene				CWC46_01460	Protein Homology	CDS	Genbank:WP_021013938.1	CDS	COORDINATES: similar to AA sequence:RefSeq:WP_011199461.1
NZ_CP025085.1	intergenic	317592	317630		intergenic_NZ_CP025085.1-nt00317592	0.78822	0.0854351	0.694008	0.740089	0.15241	0.647294	7.39711	0.174861	0.671812	1	SorTnSeq	+	intergenic_NZ_CP025085.1-nt00317592
NZ_CP025085.1	gene	317631	318068	tripartite tricarboxylate transporter TctB family protein	gene-CWC46_RS01465	0.530486	0.065091	0.644721	0.364349	0.254133	0.767175	8.67961	0.147024	0.452451	1	RefSeq	+	CWC46_RS01465	CWC46_RS01465				Gene				CWC46_01465	Protein Homology	CDS	Genbank:WP_021013937.1	CDS	COORDINATES: protein motif:HMM:NF018979.1
NZ_CP025085.1	intergenic	318069	318080		intergenic_NZ_CP025085.1-nt00318069											SorTnSeq	+	intergenic_NZ_CP025085.1-nt00318069
NZ_CP025085.1	gene	318081	319583	tripartite tricarboxylate transporter permease	gene-CWC46_RS01470	0.0447227	0.888414	1	0.143559	0.63398	0.999559	9.36249	0.0736031	0.633237	1	RefSeq	+	CWC46_RS01470	CWC46_RS01470				Gene				CWC46_01470	Protein Homology	CDS	Genbank:WP_021013936.1	CDS	COORDINATES: similar to AA sequence:RefSeq:WP_009111123.1
NZ_CP025085.1	intergenic	319584	319620		intergenic_NZ_CP025085.1-nt00319584											SorTnSeq	+	intergenic_NZ_CP025085.1-nt00319584
NZ_CP025085.1	gene	319621	320622	dihydroxyacetone kinase subunit DhaK	gene-CWC46_RS01475	0.339275	0.560067	1	-0.991013	0.143309	0.636147	7.36734	0.189928	0.617304	1	RefSeq	+	dhaK	CWC46_RS01475				Gene	dhaK			CWC46_01475	Protein Homology	CDS	Genbank:WP_021013935.1	CDS	COORDINATES: similar to AA sequence:RefSeq:WP_017628117.1
NZ_CP025085.1	gene	320619	321221	dihydroxyacetone kinase subunit L	gene-CWC46_RS01480	0.0469093	1	1	-1.80961	0.0783547	0.553711	6.78733	0.269263	0.532312	1	RefSeq	+	CWC46_RS01480	CWC46_RS01480				Gene				CWC46_01480	Protein Homology	CDS	Genbank:WP_021013934.1	CDS	COORDINATES: similar to AA sequence:RefSeq:WP_006536785.1
NZ_CP025085.1	intergenic	321222	321263		intergenic_NZ_CP025085.1-nt00321222											SorTnSeq	+	intergenic_NZ_CP025085.1-nt00321222
NZ_CP025085.1	gene	321264	322175	dihydrodipicolinate synthase family protein	gene-CWC46_RS01485	0.329407	0.525777	1	-0.379168	0.590056	0.978312	7.76488	0.305234	0.228112	1	RefSeq	+	CWC46_RS01485	CWC46_RS01485				Gene				CWC46_01485	Protein Homology	CDS	Genbank:WP_021013933.1	CDS	COORDINATES: similar to AA sequence:RefSeq:WP_017827725.1
NZ_CP025085.1	intergenic	322176	322531		intergenic_NZ_CP025085.1-nt00322176	-0.190669	0.734345	1	0.205788	0.598416	0.984396	8.1417	0.0747356	0.765063	1	SorTnSeq	+	intergenic_NZ_CP025085.1-nt00322176
NZ_CP025085.1	gene	322532	323533	hypothetical protein	gene-CWC46_RS01495	0.398697	0.0396761	0.555135	0.644373	0.000304983	0.0340978	9.83385	0.0734959	0.587465	1	RefSeq	+	CWC46_RS01495	CWC46_RS01495				Gene				CWC46_01495	Protein Homology	CDS	Genbank:WP_021013932.1	CDS	COORDINATES: similar to AA sequence:RefSeq:WP_019844191.1
NZ_CP025085.1	intergenic	323534	323749		intergenic_NZ_CP025085.1-nt00323534	-1.26449	0.301759	0.900099	-1.38738	0.11847	0.608972	6.39687	0.193228	0.765993	1	SorTnSeq	+	intergenic_NZ_CP025085.1-nt00323534
NZ_CP025085.1	gene	323750	325819	glycine--tRNA ligase subunit beta	gene-CWC46_RS01500											RefSeq	-	glyS	CWC46_RS01500				Gene	glyS			CWC46_01500	Protein Homology	CDS	Genbank:WP_021013931.1	CDS	COORDINATES: similar to AA sequence:RefSeq:WP_001291772.1
NZ_CP025085.1	intergenic	325820	325828		intergenic_NZ_CP025085.1-nt00325820											SorTnSeq	+	intergenic_NZ_CP025085.1-nt00325820
NZ_CP025085.1	gene	325829	326743	glycine--tRNA ligase subunit alpha	gene-CWC46_RS01505											RefSeq	-	glyQ	CWC46_RS01505				Gene	glyQ			CWC46_01505	Protein Homology	CDS	Genbank:WP_021013930.1	CDS	COORDINATES: similar to AA sequence:RefSeq:WP_002440676.1
NZ_CP025085.1	intergenic	326744	326861		intergenic_NZ_CP025085.1-nt00326744											SorTnSeq	+	intergenic_NZ_CP025085.1-nt00326744
NZ_CP025085.1	gene	326862	327668	sulfite exporter TauE/SafE family protein	gene-CWC46_RS01510	-1.05262	0.121451	0.716354	-0.352511	0.75523	1	7.18741	0.0104489	1	1	RefSeq	-	CWC46_RS01510	CWC46_RS01510				Gene				CWC46_01510	Protein Homology	CDS	Genbank:WP_021013929.1	CDS	COORDINATES: similar to AA sequence:RefSeq:WP_009110874.1
NZ_CP025085.1	intergenic	327669	327876		intergenic_NZ_CP025085.1-nt00327669	0.850647	0.332307	0.921205	-1.6839	0.179688	0.683602	6.04549	-0.0731647	1	1	SorTnSeq	+	intergenic_NZ_CP025085.1-nt00327669
NZ_CP025085.1	gene	327877	328425	DNA-3-methyladenine glycosylase I	gene-CWC46_RS01515	-0.244045	0.81453	1	0.195655	1	1	6.54503	0.421204	0.381696	1	RefSeq	+	CWC46_RS01515	CWC46_RS01515				Gene				CWC46_01515	Protein Homology	CDS	Genbank:WP_021013928.1	CDS	COORDINATES: similar to AA sequence:RefSeq:WP_010296571.1
NZ_CP025085.1	intergenic	328426	328436		intergenic_NZ_CP025085.1-nt00328426											SorTnSeq	+	intergenic_NZ_CP025085.1-nt00328426
NZ_CP025085.1	gene	328437	328868	N-acetyltransferase	gene-CWC46_RS01520											RefSeq	+	CWC46_RS01520	CWC46_RS01520				Gene				CWC46_01520	Protein Homology	CDS	Genbank:WP_021013927.1	CDS	COORDINATES: similar to AA sequence:RefSeq:WP_012763699.1
NZ_CP025085.1	intergenic	328869	329226		intergenic_NZ_CP025085.1-nt00328869	-1.26449	0.301759	0.900099	-0.131663	1	1	6.39692	0.0191892	1	1	SorTnSeq	+	intergenic_NZ_CP025085.1-nt00328869
NZ_CP025085.1	gene	329227	330189	glyoxylate/hydroxypyruvate reductase GhrB	gene-CWC46_RS01525	0.255001	0.75523	1	-0.638436	0.405034	0.880775	7.17618	-0.0442115	1	1	RefSeq	+	ghrB	CWC46_RS01525				Gene	ghrB			CWC46_01525	Protein Homology	CDS	Genbank:WP_021013926.1	CDS	COORDINATES: similar to AA sequence:RefSeq:WP_010296561.1
NZ_CP025085.1	intergenic	330190	330533		intergenic_NZ_CP025085.1-nt00330190	0.18085	1	1	-0.341815	0.774414	1	6.09438	-0.0804951	1	1	SorTnSeq	+	intergenic_NZ_CP025085.1-nt00330190
NZ_CP025085.1	gene	330534	331742	aldose 1-epimerase family protein	gene-CWC46_RS01530	-0.0789963	1	1	0.227463	0.620148	0.995121	7.81685	0.29123	0.238296	1	RefSeq	-	CWC46_RS01530	CWC46_RS01530				Gene				CWC46_01530	Protein Homology	CDS	Genbank:WP_021013925.1	CDS	COORDINATES: similar to AA sequence:RefSeq:WP_005976355.1
NZ_CP025085.1	intergenic	331743	332133		intergenic_NZ_CP025085.1-nt00331743	-1.76587	0.109375	0.716354	-0.98602	0.387696	0.875508	6.14163	0.227995	0.73588	1	SorTnSeq	+	intergenic_NZ_CP025085.1-nt00331743
NZ_CP025085.1	gene	332134	333390	valine--pyruvate transaminase	gene-CWC46_RS01535	-0.214802	0.775451	1	-1.76756	0.00947566	0.243208	7.44475	0.121939	0.706886	1	RefSeq	+	CWC46_RS01535	CWC46_RS01535				Gene				CWC46_01535	Protein Homology	CDS	Genbank:WP_021013924.1	CDS	COORDINATES: similar to AA sequence:RefSeq:WP_013320056.1
NZ_CP025085.1	intergenic	333391	333487		intergenic_NZ_CP025085.1-nt00333391											SorTnSeq	+	intergenic_NZ_CP025085.1-nt00333391
NZ_CP025085.1	gene	333488	334774	Zn-dependent hydrolase	gene-CWC46_RS01540	-0.894809	0.1325	0.738339	-0.617465	0.26819	0.767807	7.29587	0.106595	0.762039	1	RefSeq	-	CWC46_RS01540	CWC46_RS01540				Gene				CWC46_01540	Protein Homology	CDS	Genbank:WP_021013923.1	CDS	COORDINATES: similar to AA sequence:RefSeq:WP_012763689.1
NZ_CP025085.1	intergenic	334775	334820		intergenic_NZ_CP025085.1-nt00334775											SorTnSeq	+	intergenic_NZ_CP025085.1-nt00334775
NZ_CP025085.1	gene	334821	336272	dihydropyrimidinase	gene-CWC46_RS01545	-0.654373	0.281043	0.895025	0.0746542	0.87463	1	7.28541	0.424547	0.17967	1	RefSeq	-	hydA	CWC46_RS01545				Gene	hydA			CWC46_01545	Protein Homology	CDS	Genbank:WP_021013922.1	CDS	COORDINATES: similar to AA sequence:RefSeq:WP_009110863.1
NZ_CP025085.1	intergenic	336273	336306		intergenic_NZ_CP025085.1-nt00336273											SorTnSeq	+	intergenic_NZ_CP025085.1-nt00336273
NZ_CP025085.1	gene	336307	337620	NAD-dependent dihydropyrimidine dehydrogenase subunit PreA	gene-CWC46_RS01550	-0.469392	0.321088	0.921026	-1.12179	0.0273413	0.391803	7.81666	-0.0299603	0.870781	1	RefSeq	-	preA	CWC46_RS01550				Gene	preA			CWC46_01550	Protein Homology	CDS	Genbank:WP_021013921.1	CDS	COORDINATES: similar to AA sequence:RefSeq:WP_012763687.1
NZ_CP025085.1	gene	337613	339031	NAD(P)-dependent oxidoreductase	gene-CWC46_RS01555	-0.296332	0.671813	1	-0.187983	0.783848	1	7.68722	0.364688	0.161889	1	RefSeq	-	CWC46_RS01555	CWC46_RS01555				Gene				CWC46_01555	Protein Homology	CDS	Genbank:WP_021013920.1	CDS	COORDINATES: similar to AA sequence:RefSeq:WP_007373734.1
NZ_CP025085.1	intergenic	339032	339607		intergenic_NZ_CP025085.1-nt00339032	-0.216868	1	1	-0.341814	1	1	6.11822	0.0956764	1	1	SorTnSeq	+	intergenic_NZ_CP025085.1-nt00339032
NZ_CP025085.1	gene	339608	340528	zinc ABC transporter solute-binding protein	gene-CWC46_RS01560	-0.838798	0.424358	0.975577	-0.965542	0.307458	0.798693	6.59684	-0.448737	0.331753	1	RefSeq	+	CWC46_RS01560	CWC46_RS01560				Gene				CWC46_01560	Protein Homology	CDS	Genbank:WP_021013919.1	CDS	COORDINATES: similar to AA sequence:RefSeq:WP_009636101.1
NZ_CP025085.1	intergenic	340529	340529		intergenic_NZ_CP025085.1-nt00340529											SorTnSeq	+	intergenic_NZ_CP025085.1-nt00340529
NZ_CP025085.1	gene	340530	341357	metal ABC transporter ATP-binding protein	gene-CWC46_RS01565	-1.0861	0.121451	0.716354	-0.552743	0.255877	0.767175	7.22079	0.0635434	0.835848	1	RefSeq	+	CWC46_RS01565	CWC46_RS01565				Gene				CWC46_01565	Protein Homology	CDS	Genbank:WP_021013918.1	CDS	COORDINATES: similar to AA sequence:RefSeq:WP_018424455.1
NZ_CP025085.1	intergenic	341358	341363		intergenic_NZ_CP025085.1-nt00341358											SorTnSeq	+	intergenic_NZ_CP025085.1-nt00341358
NZ_CP025085.1	gene	341364	342227	metal ABC transporter permease	gene-CWC46_RS01570	-0.118117	1	1	-0.0976722	1	1	7.24272	0.203206	0.594293	1	RefSeq	+	CWC46_RS01570	CWC46_RS01570				Gene				CWC46_01570	Protein Homology	CDS	Genbank:WP_037380475.1	CDS	COORDINATES: similar to AA sequence:RefSeq:WP_017490808.1
NZ_CP025085.1	intergenic	342228	342229		intergenic_NZ_CP025085.1-nt00342228											SorTnSeq	+	intergenic_NZ_CP025085.1-nt00342228
NZ_CP025085.1	gene	342230	343012	metal ABC transporter permease	gene-CWC46_RS01575	-0.314945	0.85275	1	-0.0394454	1	1	6.77245	-0.275183	0.607473	1	RefSeq	+	CWC46_RS01575	CWC46_RS01575				Gene				CWC46_01575	Protein Homology	CDS	Genbank:WP_021013916.1	CDS	COORDINATES: similar to AA sequence:RefSeq:WP_009636098.1
NZ_CP025085.1	intergenic	343013	343017		intergenic_NZ_CP025085.1-nt00343013											SorTnSeq	+	intergenic_NZ_CP025085.1-nt00343013
NZ_CP025085.1	gene	343018	343707	TetR/AcrR family transcriptional regulator	gene-CWC46_RS01580	0.511247	0.45826	0.982097	-1.15248	0.189248	0.692764	6.90167	0.626341	0.114258	1	RefSeq	-	CWC46_RS01580	CWC46_RS01580				Gene				CWC46_01580	Protein Homology	CDS	Genbank:WP_021013915.1	CDS	COORDINATES: similar to AA sequence:RefSeq:WP_011803390.1
NZ_CP025085.1	intergenic	343708	343786		intergenic_NZ_CP025085.1-nt00343708											SorTnSeq	+	intergenic_NZ_CP025085.1-nt00343708
NZ_CP025085.1	gene	343787	344794	ABC transporter substrate-binding protein	gene-CWC46_RS01585	-2.197	0.00432421	0.216402	-1.14315	0.0399873	0.438943	7.23176	-0.652354	0.0333623	1	RefSeq	-	CWC46_RS01585	CWC46_RS01585				Gene				CWC46_01585	Protein Homology	CDS	Genbank:WP_021013914.1	CDS	COORDINATES: similar to AA sequence:RefSeq:WP_012763680.1
NZ_CP025085.1	intergenic	344795	344881		intergenic_NZ_CP025085.1-nt00344795											SorTnSeq	+	intergenic_NZ_CP025085.1-nt00344795
NZ_CP025085.1	gene	344882	345970	ABC transporter permease	gene-CWC46_RS01590	-0.260708	0.703539	1	-1.01883	0.0627386	0.526908	7.67925	-0.202663	0.48803	1	RefSeq	-	CWC46_RS01590	CWC46_RS01590				Gene				CWC46_01590	Protein Homology	CDS	Genbank:WP_021013913.1	CDS	COORDINATES: similar to AA sequence:RefSeq:WP_007373737.1
NZ_CP025085.1	gene	345970	346866	ABC transporter permease	gene-CWC46_RS01595	-0.47393	0.499562	1	-0.413877	0.627104	0.998478	7.14163	0.0555581	1	1	RefSeq	-	CWC46_RS01595	CWC46_RS01595				Gene				CWC46_01595	Protein Homology	CDS	Genbank:WP_021013912.1	CDS	COORDINATES: similar to AA sequence:RefSeq:WP_012977785.1
NZ_CP025085.1	gene	346856	347695	ABC transporter ATP-binding protein	gene-CWC46_RS01600	-0.762358	0.162757	0.777808	-0.168777	0.87463	1	7.19865	0.0449217	0.915187	1	RefSeq	-	CWC46_RS01600	CWC46_RS01600				Gene				CWC46_01600	Protein Homology	CDS	Genbank:WP_021013911.1	CDS	COORDINATES: similar to AA sequence:RefSeq:WP_012763677.1
NZ_CP025085.1	intergenic	347696	348011		intergenic_NZ_CP025085.1-nt00347696											SorTnSeq	+	intergenic_NZ_CP025085.1-nt00347696
NZ_CP025085.1	gene	348012	349334	aspartate aminotransferase family protein	gene-CWC46_RS01605	-0.0364623	1	1	-0.165846	0.880397	1	7.34736	0.0262743	0.918779	1	RefSeq	-	CWC46_RS01605	CWC46_RS01605				Gene				CWC46_01605	Protein Homology	CDS	Genbank:WP_021013910.1	CDS	COORDINATES: similar to AA sequence:RefSeq:WP_012763676.1
NZ_CP025085.1	intergenic	349335	349666		intergenic_NZ_CP025085.1-nt00349335	-2.09455	0.0945303	0.700219	0.197844	1	1	6.27494	-0.256027	0.747657	1	SorTnSeq	+	intergenic_NZ_CP025085.1-nt00349335
NZ_CP025085.1	gene	349667	350431	SDR family NAD(P)-dependent oxidoreductase	gene-CWC46_RS01610	-1.41068	0.0165896	0.403792	-0.877393	0.143868	0.636147	7.40648	-0.0784925	0.849552	1	RefSeq	+	CWC46_RS01610	CWC46_RS01610				Gene				CWC46_01610	Protein Homology	CDS	Genbank:WP_021013909.1	CDS	COORDINATES: similar to AA sequence:RefSeq:WP_012763675.1
NZ_CP025085.1	intergenic	350432	350616		intergenic_NZ_CP025085.1-nt00350432	-0.305885	1	1	-1.32401	0.726563	1	5.71105	-0.321407	0.81453	1	SorTnSeq	+	intergenic_NZ_CP025085.1-nt00350432
NZ_CP025085.1	gene	350617	352113	PLP-dependent aminotransferase family protein	gene-CWC46_RS01615	-1.12801	0.0884313	0.694008	-0.3991	0.479891	0.922363	7.51823	0.155084	0.645502	1	RefSeq	+	CWC46_RS01615	CWC46_RS01615				Gene				CWC46_01615	Protein Homology	CDS	Genbank:WP_021013908.1	CDS	COORDINATES: similar to AA sequence:RefSeq:WP_009110847.1
NZ_CP025085.1	intergenic	352114	352197		intergenic_NZ_CP025085.1-nt00352114											SorTnSeq	+	intergenic_NZ_CP025085.1-nt00352114
NZ_CP025085.1	gene	352198	353166	glucokinase	gene-CWC46_RS01620	-0.577616	0.596616	1	-0.961218	0.281043	0.782459	7.03291	0.106396	0.737557	1	RefSeq	-	glk	CWC46_RS01620				Gene	glk			CWC46_01620	Protein Homology	CDS	Genbank:WP_021013907.1	CDS	COORDINATES: similar to AA sequence:RefSeq:WP_013509971.1
NZ_CP025085.1	intergenic	353167	353288		intergenic_NZ_CP025085.1-nt00353167											SorTnSeq	+	intergenic_NZ_CP025085.1-nt00353167
NZ_CP025085.1	gene	353289	353747	GNAT family N-acetyltransferase	gene-CWC46_RS01625	-1.46064	0.143464	0.738339	-0.327909	0.831812	1	6.50939	-0.00515349	1	1	RefSeq	-	CWC46_RS01625	CWC46_RS01625				Gene				CWC46_01625	Protein Homology	CDS	Genbank:WP_021013906.1	CDS	COORDINATES: similar to AA sequence:RefSeq:WP_007374050.1
NZ_CP025085.1	intergenic	353748	353948		intergenic_NZ_CP025085.1-nt00353748	-0.767803	0.548829	1	-0.890368	0.774414	1	6.04544	0.0102779	1	1	SorTnSeq	+	intergenic_NZ_CP025085.1-nt00353748
NZ_CP025085.1	gene	353949	355079	phosphoserine transaminase	gene-CWC46_RS01630	-0.769389	0.108131	0.716354	-0.709411	0.222055	0.726294	7.4065	0.185847	0.565706	1	RefSeq	+	CWC46_RS01630	CWC46_RS01630				Gene				CWC46_01630	Protein Homology	CDS	Genbank:WP_021013905.1	CDS	COORDINATES: similar to AA sequence:RefSeq:WP_017346583.1
NZ_CP025085.1	intergenic	355080	355127		intergenic_NZ_CP025085.1-nt00355080											SorTnSeq	+	intergenic_NZ_CP025085.1-nt00355080
NZ_CP025085.1	gene	355128	356153	LacI family DNA-binding transcriptional regulator	gene-CWC46_RS01635	0.29098	0.75523	1	-3.22661	0.000533543	0.0490036	7.0943	-0.00800788	1	1	RefSeq	-	CWC46_RS01635	CWC46_RS01635				Gene				CWC46_01635	Protein Homology	CDS	Genbank:WP_021013904.1	CDS	COORDINATES: similar to AA sequence:RefSeq:WP_017492089.1
NZ_CP025085.1	intergenic	356154	356440		intergenic_NZ_CP025085.1-nt00356154	0.756364	0.326941	0.921205	-0.510767	0.647607	1	6.56256	0.0683125	1	1	SorTnSeq	+	intergenic_NZ_CP025085.1-nt00356154
NZ_CP025085.1	gene	356441	356887	PTS sugar transporter subunit IIA	gene-CWC46_RS01640	-0.699035	0.0887857	0.694008	-0.638318	0.15068	0.645385	8.17593	0.077986	0.776843	1	RefSeq	+	CWC46_RS01640	CWC46_RS01640				Gene				CWC46_01640	Protein Homology	CDS	Genbank:WP_021013903.1	CDS	COORDINATES: similar to AA sequence:RefSeq:WP_008104669.1
NZ_CP025085.1	intergenic	356888	356904		intergenic_NZ_CP025085.1-nt00356888											SorTnSeq	+	intergenic_NZ_CP025085.1-nt00356888
NZ_CP025085.1	gene	356905	357171	PTS sugar transporter subunit IIB	gene-CWC46_RS01645	0.297483	0.520296	1	0.223363	0.52502	0.948545	8.10053	-0.112064	0.640569	1	RefSeq	+	CWC46_RS01645	CWC46_RS01645				Gene				CWC46_01645	Protein Homology	CDS	Genbank:WP_021013902.1	CDS	COORDINATES: similar to AA sequence:RefSeq:WP_015366287.1
NZ_CP025085.1	intergenic	357172	357286		intergenic_NZ_CP025085.1-nt00357172	0.489482	0.216847	0.835947	0.768737	0.0449794	0.454031	7.98863	-0.0404974	0.935817	1	SorTnSeq	+	intergenic_NZ_CP025085.1-nt00357172
NZ_CP025085.1	gene	357287	358549	PTS ascorbate transporter subunit IIC	gene-CWC46_RS01650	0.209845	0.254738	0.86697	0.381797	0.0256593	0.379234	10.0977	0.13611	0.219414	1	RefSeq	+	CWC46_RS01650	CWC46_RS01650				Gene				CWC46_01650	Protein Homology	CDS	Genbank:WP_021013901.1	CDS	COORDINATES: similar to AA sequence:RefSeq:YP_005226992.1
NZ_CP025085.1	intergenic	358550	358779		intergenic_NZ_CP025085.1-nt00358550	0.444605	0.5224	1	-0.665752	0.281043	0.782459	7.22086	0.439695	0.165445	1	SorTnSeq	+	intergenic_NZ_CP025085.1-nt00358550
NZ_CP025085.1	gene	358780	359520	YitT family protein	gene-CWC46_RS01655	-0.519334	0.0839726	0.694008	0.321106	0.190302	0.695612	9.09734	0.122082	0.466187	1	RefSeq	+	CWC46_RS01655	CWC46_RS01655				Gene				CWC46_01655	Protein Homology	CDS	Genbank:WP_021013900.1	CDS	COORDINATES: similar to AA sequence:RefSeq:WP_013320082.1
NZ_CP025085.1	gene	359508	360419	LysR family transcriptional regulator	gene-CWC46_RS01660	-0.0822021	0.869925	1	-0.0259986	1	1	8.95892	0.0933151	0.622477	1	RefSeq	-	CWC46_RS01660	CWC46_RS01660				Gene				CWC46_01660	Protein Homology	CDS	Genbank:WP_021013899.1	CDS	COORDINATES: similar to AA sequence:RefSeq:WP_008783851.1
NZ_CP025085.1	intergenic	360420	360540		intergenic_NZ_CP025085.1-nt00360420	-0.863383	0.387696	0.948327	0.742159	0.359285	0.847909	6.1875	-0.0869009	1	1	SorTnSeq	+	intergenic_NZ_CP025085.1-nt00360420
NZ_CP025085.1	gene	360541	361332	protein of unknown function YqcI/YcgG	gene-CWC46_RS01665	-0.180122	0.464437	0.988744	0.494503	0.0137905	0.293192	9.63471	0.150611	0.276621	1	RefSeq	+	CWC46_RS01665	CWC46_RS01665				Gene				CWC46_01665	Protein Homology	CDS	Genbank:WP_021013898.1	CDS	COORDINATES: similar to AA sequence:RefSeq:WP_017490372.1
NZ_CP025085.1	gene	361332	361970	LysE family translocator	gene-CWC46_RS01670	0.552337	0.00370436	0.198498	0.450179	0.0130495	0.292136	9.83746	0.0225234	0.867774	1	RefSeq	+	CWC46_RS01670	CWC46_RS01670				Gene				CWC46_01670	Protein Homology	CDS	Genbank:WP_021013897.1	CDS	COORDINATES: similar to AA sequence:RefSeq:WP_010447097.1
NZ_CP025085.1	intergenic	361971	362229		intergenic_NZ_CP025085.1-nt00361971	-0.346454	0.504407	1	0.253228	0.62541	0.998478	7.75733	0.0765482	0.794126	1	SorTnSeq	+	intergenic_NZ_CP025085.1-nt00361971
NZ_CP025085.1	gene	362230	363579	glutathione-disulfide reductase	gene-CWC46_RS01675	-0.910665	0.174174	0.801673	-0.275311	0.575852	0.971935	7.59672	0.297641	0.283093	1	RefSeq	-	gorA	CWC46_RS01675				Gene	gorA			CWC46_01675	Protein Homology	CDS	Genbank:WP_021013896.1	CDS	COORDINATES: similar to AA sequence:RefSeq:WP_004106680.1
NZ_CP025085.1	intergenic	363580	363729		intergenic_NZ_CP025085.1-nt00363580											SorTnSeq	+	intergenic_NZ_CP025085.1-nt00363580
NZ_CP025085.1	gene	363730	364572	23S rRNA (adenine(2030)-N(6))-methyltransferase RlmJ	gene-CWC46_RS01680	-0.39916	0.607593	1	-2.25583	0.00935554	0.243208	6.92885	-0.180285	0.639976	1	RefSeq	-	CWC46_RS01680	CWC46_RS01680				Gene				CWC46_01680	Protein Homology	CDS	Genbank:WP_037381025.1	CDS	COORDINATES: similar to AA sequence:RefSeq:WP_005122498.1
NZ_CP025085.1	intergenic	364573	365001		intergenic_NZ_CP025085.1-nt00364573	-0.789216	0.404874	0.965527	-0.605261	0.557198	0.957887	6.56252	-0.522117	0.202642	1	SorTnSeq	+	intergenic_NZ_CP025085.1-nt00364573
NZ_CP025085.1	gene	365002	367044	oligopeptidase A	gene-CWC46_RS01685	-2.23692	0.0592114	0.642244	-0.201712	1	1	6.61365	0.543293	0.29446	1	RefSeq	+	prlC	CWC46_RS01685				Gene	prlC			CWC46_01685	Protein Homology	CDS	Genbank:WP_037381022.1	CDS	COORDINATES: similar to AA sequence:RefSeq:WP_013320094.1
NZ_CP025085.1	gene	367041	367802	16S rRNA (guanine(1516)-N(2))-methyltransferase RsmJ	gene-CWC46_RS01690	-0.244045	1	1	-1.31555	0.179566	0.683602	6.47283	0.421205	0.381696	1	RefSeq	+	rsmJ	CWC46_RS01690				Gene	rsmJ			CWC46_01690	Protein Homology	CDS	Genbank:WP_021013893.1	CDS	COORDINATES: similar to AA sequence:RefSeq:WP_005968201.1
NZ_CP025085.1	intergenic	367803	368063		intergenic_NZ_CP025085.1-nt00367803	-0.9067	0.6875	1	-3.86754	0.125	0.608972	5.67932	0.387988	0.823803	1	SorTnSeq	+	intergenic_NZ_CP025085.1-nt00367803
NZ_CP025085.1	gene	368064	369023	isoaspartyl peptidase/L-asparaginase	gene-CWC46_RS01695	-5.76466	0.000728628	0.067792	-1.50135	0.0755197	0.553711	6.91524	0.368909	0.308173	1	RefSeq	-	CWC46_RS01695	CWC46_RS01695				Gene				CWC46_01695	Protein Homology	CDS	Genbank:WP_021013892.1	CDS	COORDINATES: similar to AA sequence:RefSeq:WP_013319952.1
NZ_CP025085.1	intergenic	369024	369063		intergenic_NZ_CP025085.1-nt00369024											SorTnSeq	+	intergenic_NZ_CP025085.1-nt00369024
NZ_CP025085.1	gene	369064	369885	M55 family metallopeptidase	gene-CWC46_RS01700	-0.98325	0.162757	0.777808	-0.133663	1	1	7.1647	0.050118	0.914213	1	RefSeq	-	CWC46_RS01700	CWC46_RS01700				Gene				CWC46_01700	Protein Homology	CDS	Genbank:WP_021013891.1	CDS	COORDINATES: similar to AA sequence:RefSeq:WP_012882885.1
NZ_CP025085.1	intergenic	369886	369895		intergenic_NZ_CP025085.1-nt00369886											SorTnSeq	+	intergenic_NZ_CP025085.1-nt00369886
NZ_CP025085.1	gene	369896	370954	P1 family peptidase	gene-CWC46_RS01705	-1.21791	0.104126	0.716354	0.202285	0.65126	1	7.09431	-0.0382163	1	1	RefSeq	-	CWC46_RS01705	CWC46_RS01705				Gene				CWC46_01705	Protein Homology	CDS	Genbank:WP_021013890.1	CDS	COORDINATES: similar to AA sequence:RefSeq:WP_012763785.1
NZ_CP025085.1	intergenic	370955	370963		intergenic_NZ_CP025085.1-nt00370955											SorTnSeq	+	intergenic_NZ_CP025085.1-nt00370955
NZ_CP025085.1	gene	370964	371860	ABC transporter permease subunit	gene-CWC46_RS01710	-1.62064	0.0380268	0.555135	-0.78247	0.236596	0.745168	7.03288	0.0297024	1	1	RefSeq	-	CWC46_RS01710	CWC46_RS01710				Gene				CWC46_01710	Protein Homology	CDS	Genbank:WP_021013889.1	CDS	COORDINATES: similar to AA sequence:RefSeq:WP_005967996.1
NZ_CP025085.1	intergenic	371861	371868		intergenic_NZ_CP025085.1-nt00371861											SorTnSeq	+	intergenic_NZ_CP025085.1-nt00371861
NZ_CP025085.1	gene	371869	372789	ABC transporter permease subunit	gene-CWC46_RS01715	-0.571267	0.667176	1	0.270537	1	1	6.72663	0.272202	0.607473	1	RefSeq	-	CWC46_RS01715	CWC46_RS01715				Gene				CWC46_01715	Protein Homology	CDS	Genbank:WP_021013888.1	CDS	COORDINATES: similar to AA sequence:RefSeq:WP_005967994.1
NZ_CP025085.1	intergenic	372790	372807		intergenic_NZ_CP025085.1-nt00372790											SorTnSeq	+	intergenic_NZ_CP025085.1-nt00372790
NZ_CP025085.1	gene	372808	374349	glutathione ABC transporter substrate-binding protein	gene-CWC46_RS01720	-0.601297	0.200683	0.830598	-0.453955	0.26043	0.767807	8.12981	0.135883	0.56075	1	RefSeq	-	CWC46_RS01720	CWC46_RS01720				Gene				CWC46_01720	Protein Homology	CDS	Genbank:WP_021013887.1	CDS	COORDINATES: similar to AA sequence:RefSeq:WP_007891893.1
NZ_CP025085.1	intergenic	374350	374420		intergenic_NZ_CP025085.1-nt00374350	-3.6638	0.125	0.716354	-0.843395	0.6875	1	5.35742	-0.923065	0.548829	1	SorTnSeq	+	intergenic_NZ_CP025085.1-nt00374350
NZ_CP025085.1	gene	374421	376298	ABC transporter ATP-binding protein	gene-CWC46_RS01725	-0.543193	0.252858	0.863539	-0.175972	0.63046	0.999222	7.87389	0.0633353	0.80785	1	RefSeq	-	CWC46_RS01725	CWC46_RS01725				Gene				CWC46_01725	Protein Homology	CDS	Genbank:WP_021013886.1	CDS	COORDINATES: similar to AA sequence:RefSeq:WP_009110933.1
NZ_CP025085.1	intergenic	376299	376318		intergenic_NZ_CP025085.1-nt00376299											SorTnSeq	+	intergenic_NZ_CP025085.1-nt00376299
NZ_CP025085.1	gene	376319	377284	L-Ala-D/L-Glu epimerase	gene-CWC46_RS01730	-2.91511	0.00434362	0.216402	-2.13584	0.0146336	0.298419	6.81666	-0.0214227	1	1	RefSeq	-	ycjG	CWC46_RS01730				Gene	ycjG			CWC46_01730	Protein Homology	CDS	Genbank:WP_021013885.1	CDS	COORDINATES: similar to AA sequence:RefSeq:WP_012763790.1
NZ_CP025085.1	intergenic	377285	377288		intergenic_NZ_CP025085.1-nt00377285											SorTnSeq	+	intergenic_NZ_CP025085.1-nt00377285
NZ_CP025085.1	gene	377289	378296	DUF1611 domain-containing protein	gene-CWC46_RS01735	-0.249592	0.683491	1	-1.61561	0.00956029	0.243208	7.43532	-0.258367	0.390934	1	RefSeq	-	CWC46_RS01735	CWC46_RS01735				Gene				CWC46_01735	Protein Homology	CDS	Genbank:WP_021013884.1	CDS	COORDINATES: similar to AA sequence:RefSeq:WP_017799214.1
NZ_CP025085.1	intergenic	378297	378597		intergenic_NZ_CP025085.1-nt00378297	-0.193298	0.711072	1	0.183047	0.73588	1	6.9557	-0.0120513	1	1	SorTnSeq	+	intergenic_NZ_CP025085.1-nt00378297
NZ_CP025085.1	gene	378598	378942	DUF202 domain-containing protein	gene-CWC46_RS01740	-1.02706	0.263177	0.875598	-0.445322	0.67764	1	6.63036	0.0798329	1	1	RefSeq	-	CWC46_RS01740	CWC46_RS01740				Gene				CWC46_01740	Protein Homology	CDS	Genbank:WP_021013883.1	CDS	COORDINATES: similar to AA sequence:RefSeq:WP_012763792.1
NZ_CP025085.1	intergenic	378943	378952		intergenic_NZ_CP025085.1-nt00378943											SorTnSeq	+	intergenic_NZ_CP025085.1-nt00378943
NZ_CP025085.1	gene	378953	379339	DUF202 domain-containing protein	gene-CWC46_RS01745	0.696124	0.385107	0.948327	0.0967579	1	1	6.47291	0.367483	0.535704	1	RefSeq	-	CWC46_RS01745	CWC46_RS01745				Gene				CWC46_01745	Protein Homology	CDS	Genbank:WP_051391476.1	CDS	COORDINATES: similar to AA sequence:RefSeq:WP_010295320.1
NZ_CP025085.1	intergenic	379340	379526		intergenic_NZ_CP025085.1-nt00379340											SorTnSeq	+	intergenic_NZ_CP025085.1-nt00379340
NZ_CP025085.1	gene	379527	380240	ribonuclease PH	gene-CWC46_RS01750	0.0868907	1	1	-0.44733	0.711072	1	6.80222	-0.179864	0.698886	1	RefSeq	+	rph	CWC46_RS01750				Gene	rph			CWC46_01750	Protein Homology	CDS	Genbank:WP_021013881.1	CDS	COORDINATES: similar to AA sequence:RefSeq:WP_014701968.1
NZ_CP025085.1	intergenic	380241	380481		intergenic_NZ_CP025085.1-nt00380241	-1.0654	0.453125	0.982097	-4.02644	0.21875	0.723946	5.67931	0.103503	1	1	SorTnSeq	+	intergenic_NZ_CP025085.1-nt00380241
NZ_CP025085.1	gene	380482	381123	orotate phosphoribosyltransferase	gene-CWC46_RS01755	-0.847236	0.480683	0.99597	-0.0099274	1	1	6.37732	-0.462874	0.429593	1	RefSeq	+	pyrE	CWC46_RS01755				Gene	pyrE			CWC46_01755	Protein Homology	CDS	Genbank:WP_021013880.1	CDS	COORDINATES: similar to AA sequence:RefSeq:YP_005229445.1
NZ_CP025085.1	intergenic	381124	381210		intergenic_NZ_CP025085.1-nt00381124											SorTnSeq	+	intergenic_NZ_CP025085.1-nt00381124
NZ_CP025085.1	gene	381211	381807	nucleoid occlusion factor SlmA	gene-CWC46_RS01760	-1.33843	0.289063	0.895025	-1.45421	0.289063	0.782459	5.77242	-0.176114	0.831812	1	RefSeq	-	slmA	CWC46_RS01760				Gene	slmA			CWC46_01760	Protein Homology	CDS	Genbank:WP_021013879.1	CDS	COORDINATES: similar to AA sequence:RefSeq:WP_004876908.1
NZ_CP025085.1	intergenic	381808	381916		intergenic_NZ_CP025085.1-nt00381808											SorTnSeq	+	intergenic_NZ_CP025085.1-nt00381808
NZ_CP025085.1	gene	381917	382375	dUTP diphosphatase	gene-CWC46_RS01765											RefSeq	-	dut	CWC46_RS01765				Gene	dut			CWC46_01765	Protein Homology	CDS	Genbank:WP_021013878.1	CDS	COORDINATES: similar to AA sequence:RefSeq:WP_012147515.1
NZ_CP025085.1	gene	382344	383585	bifunctional phosphopantothenoylcysteine decarboxylase/phosphopantothenate--cysteine ligase CoaBC	gene-CWC46_RS01770											RefSeq	-	coaBC	CWC46_RS01770				Gene	coaBC			CWC46_01770	Protein Homology	CDS	Genbank:WP_021013877.1	CDS	COORDINATES: similar to AA sequence:RefSeq:WP_012882899.1
NZ_CP025085.1	intergenic	383586	383721		intergenic_NZ_CP025085.1-nt00383586											SorTnSeq	+	intergenic_NZ_CP025085.1-nt00383586
NZ_CP025085.1	gene	383722	384207	DUF2202 domain-containing protein	gene-CWC46_RS01775	-0.317906	0.83882	1	0.0271409	1	1	6.61377	-0.179422	0.671813	1	RefSeq	-	CWC46_RS01775	CWC46_RS01775				Gene				CWC46_01775	Protein Homology	CDS	Genbank:WP_021013876.1	CDS	COORDINATES: similar to AA sequence:RefSeq:WP_012763799.1
NZ_CP025085.1	intergenic	384208	384407		intergenic_NZ_CP025085.1-nt00384208											SorTnSeq	+	intergenic_NZ_CP025085.1-nt00384208
NZ_CP025085.1	gene	384408	385073	DNA repair protein RadC	gene-CWC46_RS01780	-1.22181	0.0614293	0.642244	-0.782513	0.215329	0.723946	6.99474	-0.107081	0.819895	1	RefSeq	+	radC	CWC46_RS01780				Gene	radC			CWC46_01780	Protein Homology	CDS	Genbank:WP_021013875.1	CDS	COORDINATES: similar to AA sequence:RefSeq:WP_015842189.1
NZ_CP025085.1	intergenic	385074	385312		intergenic_NZ_CP025085.1-nt00385074											SorTnSeq	+	intergenic_NZ_CP025085.1-nt00385074
NZ_CP025085.1	gene	385313	385549	50S ribosomal protein L28	gene-CWC46_RS01785											RefSeq	+	rpmB	CWC46_RS01785				Gene	rpmB			CWC46_01785	Protein Homology	CDS	Genbank:WP_021013874.1	CDS	COORDINATES: similar to AA sequence:RefSeq:WP_008457442.1
NZ_CP025085.1	intergenic	385550	385560		intergenic_NZ_CP025085.1-nt00385550											SorTnSeq	+	intergenic_NZ_CP025085.1-nt00385550
NZ_CP025085.1	gene	385561	385728	50S ribosomal protein L33	gene-CWC46_RS01790											RefSeq	+	rpmG	CWC46_RS01790				Gene	rpmG			CWC46_01790	Protein Homology	CDS	Genbank:WP_021013873.1	CDS	COORDINATES: similar to AA sequence:RefSeq:WP_010847629.1
NZ_CP025085.1	intergenic	385729	385804		intergenic_NZ_CP025085.1-nt00385729											SorTnSeq	+	intergenic_NZ_CP025085.1-nt00385729
NZ_CP025085.1	gene	385805	386614	bifunctional DNA-formamidopyrimidine glycosylase/DNA-(apurinic or apyrimidinic site) lyase	gene-CWC46_RS01795	-0.390436	0.627104	1	0.466386	0.322239	0.818888	7.47286	0.466635	0.121518	1	RefSeq	+	mutM	CWC46_RS01795				Gene	mutM			CWC46_01795	Protein Homology	CDS	Genbank:WP_021013872.1	CDS	COORDINATES: similar to AA sequence:RefSeq:WP_015842188.1
NZ_CP025085.1	intergenic	386615	386663		intergenic_NZ_CP025085.1-nt00386615	-3.6638	0.125	0.716354	-0.843395	0.6875	1	5.47287	-0.172862	1	1	SorTnSeq	+	intergenic_NZ_CP025085.1-nt00386615
NZ_CP025085.1	gene	386664	387143	pantetheine-phosphate adenylyltransferase	gene-CWC46_RS01800											RefSeq	-	coaD	CWC46_RS01800				Gene	coaD			CWC46_01800	Protein Homology	CDS	Genbank:WP_021013871.1	CDS	COORDINATES: similar to AA sequence:RefSeq:WP_010285721.1
NZ_CP025085.1	gene	387133	387909	glycosyltransferase family 2 protein	gene-CWC46_RS01805	0.380391	0.366298	0.941828	-0.328174	0.583135	0.971935	7.52741	-0.233925	0.500772	1	RefSeq	-	CWC46_RS01805	CWC46_RS01805				Gene				CWC46_01805	Protein Homology	CDS	Genbank:WP_021013870.1	CDS	COORDINATES: similar to AA sequence:RefSeq:WP_012763805.1
NZ_CP025085.1	gene	387909	389192	3-deoxy-D-manno-octulosonic acid transferase	gene-CWC46_RS01810											RefSeq	-	waaA	CWC46_RS01810				Gene	waaA			CWC46_01810	Protein Homology	CDS	Genbank:WP_037380468.1	CDS	COORDINATES: similar to AA sequence:RefSeq:WP_019844112.1
NZ_CP025085.1	intergenic	389193	389722		intergenic_NZ_CP025085.1-nt00389193	0.494527	0.0534376	0.636121	0.54543	0.0246723	0.368766	9.02084	0.0610193	0.737779	1	SorTnSeq	+	intergenic_NZ_CP025085.1-nt00389193
NZ_CP025085.1	gene	389723	390853	glycosyltransferase family 4 protein	gene-CWC46_RS01815	0.444647	0.00680152	0.280814	0.423677	0.00692217	0.217598	10.2274	-0.0765169	0.491902	1	RefSeq	+	CWC46_RS01815	CWC46_RS01815				Gene				CWC46_01815	Protein Homology	CDS	Genbank:WP_021013868.1	CDS	COORDINATES: similar to AA sequence:RefSeq:WP_015836434.1
NZ_CP025085.1	gene	390850	391956	glycosyltransferase family 9 protein	gene-CWC46_RS01820	-0.667241	0.0789792	0.669728	-0.303807	0.435121	0.906037	8.48649	0.212109	0.253962	1	RefSeq	+	CWC46_RS01820	CWC46_RS01820				Gene				CWC46_01820	Protein Homology	CDS	Genbank:WP_021013867.1	CDS	COORDINATES: similar to AA sequence:RefSeq:WP_019844110.1
NZ_CP025085.1	gene	391956	393161	O-antigen ligase family protein	gene-CWC46_RS01825	0.810864	2.72866e-12	6.87212e-09	0.563912	1.57712e-06	0.000397197	11.0206	-0.0959631	0.261564	1	RefSeq	+	CWC46_RS01825	CWC46_RS01825				Gene				CWC46_01825	Protein Homology	CDS	Genbank:WP_021013866.1	CDS	COORDINATES: similar to AA sequence:RefSeq:WP_012763809.1
NZ_CP025085.1	intergenic	393162	393309		intergenic_NZ_CP025085.1-nt00393162	0.560348	0.159716	0.777808	0.299829	0.550416	0.954912	7.86005	0.0727443	0.863418	1	SorTnSeq	+	intergenic_NZ_CP025085.1-nt00393162
NZ_CP025085.1	gene	393310	394431	glycosyltransferase family 4 protein	gene-CWC46_RS01830	0.578875	0.0112586	0.347912	-0.527964	0.0548706	0.499789	9.14481	-0.173937	0.27365	1	RefSeq	-	CWC46_RS01830	CWC46_RS01830				Gene				CWC46_01830	Protein Homology	CDS	Genbank:WP_021013865.1	CDS	COORDINATES: similar to AA sequence:RefSeq:WP_013319927.1
NZ_CP025085.1	gene	394428	395513	putative lipopolysaccharide heptosyltransferase III	gene-CWC46_RS01835	0.270321	0.403477	0.965527	-0.578137	0.133216	0.624108	8.31689	-0.394243	0.0677681	1	RefSeq	-	rfaQ	CWC46_RS01835				Gene	rfaQ			CWC46_01835	Protein Homology	CDS	Genbank:WP_021013864.1	CDS	COORDINATES: similar to AA sequence:RefSeq:WP_013319926.1
NZ_CP025085.1	intergenic	395514	395525		intergenic_NZ_CP025085.1-nt00395514											SorTnSeq	+	intergenic_NZ_CP025085.1-nt00395514
NZ_CP025085.1	gene	395526	396497	lipopolysaccharide heptosyltransferase RfaC	gene-CWC46_RS01840											RefSeq	-	rfaC	CWC46_RS01840				Gene	rfaC			CWC46_01840	Protein Homology	CDS	Genbank:WP_021013863.1	CDS	COORDINATES: similar to AA sequence:RefSeq:WP_015848246.1
NZ_CP025085.1	gene	396494	397546	ADP-heptose--LPS heptosyltransferase RfaF	gene-CWC46_RS01845	0.3934	0.790528	1	-1.57362	0.289063	0.782459	5.83136	-0.576257	0.383312	1	RefSeq	-	rfaF	CWC46_RS01845				Gene	rfaF			CWC46_01845	Protein Homology	CDS	Genbank:WP_021013862.1	CDS	COORDINATES: similar to AA sequence:RefSeq:WP_013319924.1
NZ_CP025085.1	intergenic	397547	397576		intergenic_NZ_CP025085.1-nt00397547											SorTnSeq	+	intergenic_NZ_CP025085.1-nt00397547
NZ_CP025085.1	gene	397577	398509	ADP-glyceromanno-heptose 6-epimerase	gene-CWC46_RS01850											RefSeq	-	rfaD	CWC46_RS01850				Gene	rfaD			CWC46_01850	Protein Homology	CDS	Genbank:WP_021013861.1	CDS	COORDINATES: similar to AA sequence:RefSeq:WP_004956667.1
NZ_CP025085.1	intergenic	398510	398754		intergenic_NZ_CP025085.1-nt00398510	-1.33288	0.210114	0.835947	-1.4558	0.210114	0.718687	6.23184	-0.477464	0.417695	1	SorTnSeq	+	intergenic_NZ_CP025085.1-nt00398510
NZ_CP025085.1	gene	398755	399951	glycine C-acetyltransferase	gene-CWC46_RS01855	-0.945748	0.0919167	0.694008	-1.07469	0.0703961	0.535321	7.6385	0.053222	0.931203	1	RefSeq	+	CWC46_RS01855	CWC46_RS01855				Gene				CWC46_01855	Protein Homology	CDS	Genbank:WP_021013860.1	CDS	COORDINATES: similar to AA sequence:RefSeq:YP_005229421.1
NZ_CP025085.1	intergenic	399952	399964		intergenic_NZ_CP025085.1-nt00399952											SorTnSeq	+	intergenic_NZ_CP025085.1-nt00399952
NZ_CP025085.1	gene	399965	400990	L-threonine 3-dehydrogenase	gene-CWC46_RS01860	-0.609924	0.279959	0.895025	-0.422597	0.560067	0.960197	7.29596	-0.240354	0.538399	1	RefSeq	+	tdh	CWC46_RS01860				Gene	tdh			CWC46_01860	Protein Homology	CDS	Genbank:WP_021013859.1	CDS	COORDINATES: similar to AA sequence:RefSeq:WP_012882916.1
NZ_CP025085.1	intergenic	400991	401037		intergenic_NZ_CP025085.1-nt00400991											SorTnSeq	+	intergenic_NZ_CP025085.1-nt00400991
NZ_CP025085.1	gene	401038	401952	divergent polysaccharide deacetylase family protein	gene-CWC46_RS01865	-0.378053	0.560067	1	-0.656796	0.242963	0.750875	7.33721	-0.325491	0.314886	1	RefSeq	-	CWC46_RS01865	CWC46_RS01865				Gene				CWC46_01865	Protein Homology	CDS	Genbank:WP_021013858.1	CDS	COORDINATES: similar to AA sequence:RefSeq:WP_015848241.1
NZ_CP025085.1	intergenic	401953	401956		intergenic_NZ_CP025085.1-nt00401953											SorTnSeq	+	intergenic_NZ_CP025085.1-nt00401953
NZ_CP025085.1	gene	401957	403234	murein hydrolase activator EnvC	gene-CWC46_RS01870	0.34387	0.575852	1	-0.867979	0.153862	0.648226	7.44483	0.169	0.627436	1	RefSeq	-	envC	CWC46_RS01870				Gene	envC			CWC46_01870	Protein Homology	CDS	Genbank:WP_021013857.1	CDS	COORDINATES: similar to AA sequence:RefSeq:WP_015731490.1
NZ_CP025085.1	intergenic	403235	403543		intergenic_NZ_CP025085.1-nt00403235	-0.0887639	1	1	-4.9017	0.0117189	0.275831	6.39686	0.57859	0.232696	1	SorTnSeq	+	intergenic_NZ_CP025085.1-nt00403235
NZ_CP025085.1	gene	403544	403978	rhodanese-like domain-containing protein	gene-CWC46_RS01875											RefSeq	+	CWC46_RS01875	CWC46_RS01875				Gene				CWC46_01875	Protein Homology	CDS	Genbank:WP_021013856.1	CDS	COORDINATES: similar to AA sequence:RefSeq:WP_015842174.1
NZ_CP025085.1	intergenic	403979	404100		intergenic_NZ_CP025085.1-nt00403979											SorTnSeq	+	intergenic_NZ_CP025085.1-nt00403979
NZ_CP025085.1	gene	404101	404571	protein-export chaperone SecB	gene-CWC46_RS01880											RefSeq	+	secB	CWC46_RS01880				Gene	secB			CWC46_01880	Protein Homology	CDS	Genbank:WP_021013855.1	CDS	COORDINATES: similar to AA sequence:RefSeq:WP_014913761.1
NZ_CP025085.1	gene	404571	405590	NAD(P)H-dependent glycerol-3-phosphate dehydrogenase	gene-CWC46_RS01885											RefSeq	+	gpsA	CWC46_RS01885				Gene	gpsA			CWC46_01885	Protein Homology	CDS	Genbank:WP_021013854.1	CDS	COORDINATES: similar to AA sequence:RefSeq:WP_005968348.1
NZ_CP025085.1	intergenic	405591	405695		intergenic_NZ_CP025085.1-nt00405591											SorTnSeq	+	intergenic_NZ_CP025085.1-nt00405591
NZ_CP025085.1	gene	405696	406517	serine O-acetyltransferase	gene-CWC46_RS01890											RefSeq	+	cysE	CWC46_RS01890				Gene	cysE			CWC46_01890	Protein Homology	CDS	Genbank:WP_021013853.1	CDS	COORDINATES: similar to AA sequence:RefSeq:NP_312512.1
NZ_CP025085.1	intergenic	406518	406893		intergenic_NZ_CP025085.1-nt00406518	0.396705	0.62906	1	-0.986019	0.581055	0.971935	6.31675	0.486324	0.336786	1	SorTnSeq	+	intergenic_NZ_CP025085.1-nt00406518
NZ_CP025085.1	gene	406894	407793	DMT family transporter	gene-CWC46_RS01895	-1.02373	0.268283	0.875598	-0.443395	0.528354	0.951779	6.72655	0.341545	0.381245	1	RefSeq	+	CWC46_RS01895	CWC46_RS01895				Gene				CWC46_01895	Protein Homology	CDS	Genbank:WP_021013852.1	CDS	COORDINATES: similar to AA sequence:RefSeq:WP_005968352.1
NZ_CP025085.1	gene	407699	408634	HTH-type transcriptional regulator MetR	gene-CWC46_RS01900	-1.36406	0.0501034	0.625961	-0.707829	0.324011	0.818888	7.02031	-0.361533	0.368193	1	RefSeq	-	metR	CWC46_RS01900				Gene	metR			CWC46_01900	Protein Homology	CDS	Genbank:WP_021013851.1	CDS	COORDINATES: similar to AA sequence:RefSeq:WP_004720515.1
NZ_CP025085.1	intergenic	408635	408738		intergenic_NZ_CP025085.1-nt00408635											SorTnSeq	+	intergenic_NZ_CP025085.1-nt00408635
NZ_CP025085.1	gene	408739	411006	5-methyltetrahydropteroyltriglutamate--homocysteine S-methyltransferase	gene-CWC46_RS01905	0.390303	0.342839	0.928106	-0.489093	0.254309	0.767175	8.17047	0.160128	0.462314	1	RefSeq	+	metE	CWC46_RS01905				Gene	metE			CWC46_01905	Protein Homology	CDS	Genbank:WP_021013850.1	CDS	COORDINATES: similar to AA sequence:RefSeq:WP_004154951.1
NZ_CP025085.1	intergenic	411007	411172		intergenic_NZ_CP025085.1-nt00411007											SorTnSeq	+	intergenic_NZ_CP025085.1-nt00411007
NZ_CP025085.1	gene	411173	412159	GntR family transcriptional regulator	gene-CWC46_RS01910	-0.410642	0.711072	1	-0.79419	0.168639	0.676331	6.83131	-0.136148	0.804319	1	RefSeq	-	CWC46_RS01910	CWC46_RS01910				Gene				CWC46_01910	Protein Homology	CDS	Genbank:WP_037381005.1	CDS	COORDINATES: similar to AA sequence:RefSeq:WP_017476082.1
NZ_CP025085.1	intergenic	412160	412555		intergenic_NZ_CP025085.1-nt00412160	-1.56792	0.343751	0.928106	-0.239368	1	1	6.02035	0.114478	1	1	SorTnSeq	+	intergenic_NZ_CP025085.1-nt00412160
NZ_CP025085.1	gene	412556	413968	amidase	gene-CWC46_RS01915	-0.721818	0.232696	0.84081	-1.03929	0.0724559	0.539882	7.4911	0.133518	0.711708	1	RefSeq	+	CWC46_RS01915	CWC46_RS01915				Gene				CWC46_01915	Protein Homology	CDS	Genbank:WP_084297619.1	CDS	COORDINATES: similar to AA sequence:RefSeq:WP_011059703.1
NZ_CP025085.1	intergenic	413969	413984		intergenic_NZ_CP025085.1-nt00413969											SorTnSeq	+	intergenic_NZ_CP025085.1-nt00413969
NZ_CP025085.1	gene	413985	414866	polysaccharide deacetylase	gene-CWC46_RS01920	-0.473929	0.499562	1	0.037743	1	1	7.22085	0.17486	0.668289	1	RefSeq	+	CWC46_RS01920	CWC46_RS01920				Gene				CWC46_01920	Protein Homology	CDS	Genbank:WP_021013847.1	CDS	COORDINATES: similar to AA sequence:RefSeq:WP_016946041.1
NZ_CP025085.1	intergenic	414867	414900		intergenic_NZ_CP025085.1-nt00414867											SorTnSeq	+	intergenic_NZ_CP025085.1-nt00414867
NZ_CP025085.1	gene	414901	416241	MFS transporter	gene-CWC46_RS01925	-0.563485	0.252858	0.863539	-0.375027	0.470373	0.921564	7.88084	0.0771612	0.872443	1	RefSeq	+	CWC46_RS01925	CWC46_RS01925				Gene				CWC46_01925	Protein Homology	CDS	Genbank:WP_021013846.1	CDS	COORDINATES: similar to AA sequence:RefSeq:WP_014605815.1
NZ_CP025085.1	intergenic	416242	416312		intergenic_NZ_CP025085.1-nt00416242											SorTnSeq	+	intergenic_NZ_CP025085.1-nt00416242
NZ_CP025085.1	gene	416313	417089	SDR family oxidoreductase	gene-CWC46_RS01930	-0.200547	1	1	-1.03507	0.237886	0.745168	6.47287	-0.179192	0.882997	1	RefSeq	+	CWC46_RS01930	CWC46_RS01930				Gene				CWC46_01930	Protein Homology	CDS	Genbank:WP_021013845.1	CDS	COORDINATES: similar to AA sequence:RefSeq:WP_003425330.1
NZ_CP025085.1	intergenic	417090	417098		intergenic_NZ_CP025085.1-nt00417090											SorTnSeq	+	intergenic_NZ_CP025085.1-nt00417090
NZ_CP025085.1	gene	417099	417845	SDR family oxidoreductase	gene-CWC46_RS01935	-0.426433	0.541257	1	-0.553893	0.541257	0.954912	6.74202	0.106066	0.897423	1	RefSeq	+	CWC46_RS01935	CWC46_RS01935				Gene				CWC46_01935	Protein Homology	CDS	Genbank:WP_021013844.1	CDS	COORDINATES: similar to AA sequence:RefSeq:WP_006119160.1
NZ_CP025085.1	intergenic	417846	417860		intergenic_NZ_CP025085.1-nt00417846											SorTnSeq	+	intergenic_NZ_CP025085.1-nt00417846
NZ_CP025085.1	gene	417861	418157	hypothetical protein	gene-CWC46_RS01940	-1.67029	0.343751	0.928106	-0.890369	0.387696	0.875508	6.04543	0.0956763	1	1	RefSeq	+	CWC46_RS01940	CWC46_RS01940				Gene				CWC46_01940	Protein Homology	CDS	Genbank:WP_021013843.1	CDS	COORDINATES: similar to AA sequence:RefSeq:WP_006119159.1
NZ_CP025085.1	intergenic	418158	418159		intergenic_NZ_CP025085.1-nt00418158											SorTnSeq	+	intergenic_NZ_CP025085.1-nt00418158
NZ_CP025085.1	gene	418160	419203	GTP-binding protein	gene-CWC46_RS01945	-0.189201	1	1	-0.67355	0.324011	0.818888	7.27489	0.239806	0.475158	1	RefSeq	+	CWC46_RS01945	CWC46_RS01945				Gene				CWC46_01945	Protein Homology	CDS	Genbank:WP_021013842.1	CDS	COORDINATES: similar to AA sequence:RefSeq:WP_013201099.1
NZ_CP025085.1	gene	419200	420393	hypothetical protein	gene-CWC46_RS01950	-1.23185	0.0226296	0.456063	-0.638374	0.211612	0.719223	7.37722	-0.397468	0.171571	1	RefSeq	+	CWC46_RS01950	CWC46_RS01950				Gene				CWC46_01950	Protein Homology	CDS	Genbank:WP_021013841.1	CDS	COORDINATES: similar to AA sequence:RefSeq:WP_013201100.1
NZ_CP025085.1	intergenic	420394	420470		intergenic_NZ_CP025085.1-nt00420394											SorTnSeq	+	intergenic_NZ_CP025085.1-nt00420394
NZ_CP025085.1	gene	420471	421298	dienelactone hydrolase family protein	gene-CWC46_RS01955	-0.550545	0.348891	0.931447	-1.34044	0.0335533	0.426788	7.25346	-0.0921313	0.839216	1	RefSeq	-	CWC46_RS01955	CWC46_RS01955				Gene				CWC46_01955	Protein Homology	CDS	Genbank:WP_021013840.1	CDS	COORDINATES: similar to AA sequence:RefSeq:WP_004951018.1
NZ_CP025085.1	intergenic	421299	421624		intergenic_NZ_CP025085.1-nt00421299	-0.216868	1	1	0.054668	1	1	6.16476	0.176302	0.860051	1	SorTnSeq	+	intergenic_NZ_CP025085.1-nt00421299
NZ_CP025085.1	gene	421625	422389	uridine phosphorylase	gene-CWC46_RS01960	-0.793049	0.272296	0.883164	-0.0954304	1	1	6.95562	-0.143809	0.729797	1	RefSeq	+	udp	CWC46_RS01960				Gene	udp			CWC46_01960	Protein Homology	CDS	Genbank:WP_021013839.1	CDS	COORDINATES: similar to AA sequence:RefSeq:WP_010283777.1
NZ_CP025085.1	intergenic	422390	422515		intergenic_NZ_CP025085.1-nt00422390	-4.27388	0.125	0.716354	-4.29976	0.125	0.608972	5.74202	-0.0547944	1	1	SorTnSeq	+	intergenic_NZ_CP025085.1-nt00422390
NZ_CP025085.1	gene	422516	423298	tyrosine-protein phosphatase	gene-CWC46_RS01965	-0.00443792	1	1	-0.132798	0.84502	1	6.84566	0.138165	0.798154	1	RefSeq	+	CWC46_RS01965	CWC46_RS01965				Gene				CWC46_01965	Protein Homology	CDS	Genbank:WP_021013838.1	CDS	COORDINATES: similar to AA sequence:RefSeq:WP_014913769.1
NZ_CP025085.1	intergenic	423299	423629		intergenic_NZ_CP025085.1-nt00423299											SorTnSeq	+	intergenic_NZ_CP025085.1-nt00423299
NZ_CP025085.1	gene	423630	425435	carbon starvation protein A	gene-CWC46_RS01970	-0.546766	0.328436	0.921205	-0.914305	0.0463553	0.463205	7.85267	-0.125649	0.687155	1	RefSeq	+	CWC46_RS01970	CWC46_RS01970				Gene				CWC46_01970	Protein Homology	CDS	Genbank:WP_021013837.1	CDS	COORDINATES: similar to AA sequence:RefSeq:WP_012104342.1
NZ_CP025085.1	intergenic	425436	425539		intergenic_NZ_CP025085.1-nt00425436											SorTnSeq	+	intergenic_NZ_CP025085.1-nt00425436
NZ_CP025085.1	gene	425540	428179	phosphoenolpyruvate carboxylase	gene-CWC46_RS01975	-0.0873418	1	1	-0.519851	0.22425	0.731097	8.18737	0.0561845	0.828668	1	RefSeq	-	ppc	CWC46_RS01975				Gene	ppc			CWC46_01975	Protein Homology	CDS	Genbank:WP_021013836.1	CDS	COORDINATES: similar to AA sequence:RefSeq:WP_019080279.1
NZ_CP025085.1	intergenic	428180	428431		intergenic_NZ_CP025085.1-nt00428180	-0.665439	0.774414	1	-0.239369	1	1	5.94239	-0.288916	0.690039	1	SorTnSeq	+	intergenic_NZ_CP025085.1-nt00428180
NZ_CP025085.1	gene	428432	429583	acetylornithine deacetylase	gene-CWC46_RS01980	-0.360272	0.596616	1	0.151435	0.74926	1	7.15325	0.200726	0.581119	1	RefSeq	-	argE	CWC46_RS01980				Gene	argE			CWC46_01980	Protein Homology	CDS	Genbank:WP_021013835.1	CDS	COORDINATES: similar to AA sequence:RefSeq:WP_013099301.1
NZ_CP025085.1	intergenic	429584	429794		intergenic_NZ_CP025085.1-nt00429584											SorTnSeq	+	intergenic_NZ_CP025085.1-nt00429584
NZ_CP025085.1	gene	429795	430799	N-acetyl-gamma-glutamyl-phosphate reductase	gene-CWC46_RS01985	-0.248182	0.607593	1	-0.565535	0.499562	0.937974	7.31662	0.543064	0.0699042	1	RefSeq	+	argC	CWC46_RS01985				Gene	argC			CWC46_01985	Protein Homology	CDS	Genbank:WP_021013834.1	CDS	COORDINATES: similar to AA sequence:RefSeq:WP_005278246.1
NZ_CP025085.1	intergenic	430800	430825		intergenic_NZ_CP025085.1-nt00430800											SorTnSeq	+	intergenic_NZ_CP025085.1-nt00430800
NZ_CP025085.1	gene	430826	431599	acetylglutamate kinase	gene-CWC46_RS01990	-0.235441	0.862393	1	-0.581829	0.480398	0.922363	6.94236	0.0208168	1	1	RefSeq	+	argB	CWC46_RS01990				Gene	argB			CWC46_01990	Protein Homology	CDS	Genbank:WP_021013833.1	CDS	COORDINATES: similar to AA sequence:RefSeq:WP_004710562.1
NZ_CP025085.1	intergenic	431600	431725		intergenic_NZ_CP025085.1-nt00431600											SorTnSeq	+	intergenic_NZ_CP025085.1-nt00431600
NZ_CP025085.1	gene	431726	433099	argininosuccinate lyase	gene-CWC46_RS01995	-0.920337	0.0769283	0.665786	-1.19918	0.0151349	0.303723	7.80199	-0.162455	0.570341	1	RefSeq	+	argH	CWC46_RS01995				Gene	argH			CWC46_01995	Protein Homology	CDS	Genbank:WP_021013832.1	CDS	COORDINATES: similar to AA sequence:RefSeq:WP_004931059.1
NZ_CP025085.1	intergenic	433100	433263		intergenic_NZ_CP025085.1-nt00433100	-0.00431799	1	1	0.833561	0.454499	0.907018	6.11826	0.226796	0.850555	1	SorTnSeq	+	intergenic_NZ_CP025085.1-nt00433100
NZ_CP025085.1	gene	433264	433701	universal stress protein UspA	gene-CWC46_RS02000	-1.46064	0.143464	0.738339	-2.47961	0.021271	0.345743	6.45417	0.0484873	1	1	RefSeq	-	uspA	CWC46_RS02000				Gene	uspA			CWC46_02000	Protein Homology	CDS	Genbank:WP_021013831.1	CDS	COORDINATES: similar to AA sequence:RefSeq:WP_008815546.1
NZ_CP025085.1	intergenic	433702	434298		intergenic_NZ_CP025085.1-nt00433702	0.28073	0.74926	1	0.016018	1	1	7.20985	0.260351	0.51543	1	SorTnSeq	+	intergenic_NZ_CP025085.1-nt00433702
NZ_CP025085.1	gene	434299	434634	universal stress protein UspB	gene-CWC46_RS02005	-0.953022	0.581055	1	0.435481	0.647607	1	6.27495	0.136952	0.86794	1	RefSeq	+	uspB	CWC46_RS02005				Gene	uspB			CWC46_02005	Protein Homology	CDS	Genbank:WP_021013830.1	CDS	COORDINATES: similar to AA sequence:RefSeq:WP_014913651.1
NZ_CP025085.1	intergenic	434635	434744		intergenic_NZ_CP025085.1-nt00434635											SorTnSeq	+	intergenic_NZ_CP025085.1-nt00434635
NZ_CP025085.1	gene	434745	436250	inorganic phosphate transporter PitA	gene-CWC46_RS02010	-0.271366	0.84502	1	-0.399377	0.557198	0.957887	7.07002	0.681266	0.0448308	1	RefSeq	-	pitA	CWC46_RS02010				Gene	pitA			CWC46_02010	Protein Homology	CDS	Genbank:WP_021013829.1	CDS	COORDINATES: similar to AA sequence:RefSeq:WP_015962254.1
NZ_CP025085.1	intergenic	436251	436522		intergenic_NZ_CP025085.1-nt00436251	-0.969573	0.359285	0.934991	-0.387809	0.67764	1	6.47288	-0.302701	0.65874	1	SorTnSeq	+	intergenic_NZ_CP025085.1-nt00436251
NZ_CP025085.1	gene	436523	437707	NAD(P)/FAD-dependent oxidoreductase	gene-CWC46_RS02015	-0.782079	0.148009	0.744776	-0.538235	0.313507	0.805633	7.77229	-0.0424867	0.933626	1	RefSeq	+	CWC46_RS02015	CWC46_RS02015				Gene				CWC46_02015	Protein Homology	CDS	Genbank:WP_021013828.1	CDS	COORDINATES: similar to AA sequence:RefSeq:WP_013315776.1
NZ_CP025085.1	intergenic	437708	437966		intergenic_NZ_CP025085.1-nt00437708	0.207462	0.860051	1	0.363426	0.617721	0.992491	7.04551	0.218945	0.635311	1	SorTnSeq	+	intergenic_NZ_CP025085.1-nt00437708
NZ_CP025085.1	gene	437967	438749	helix-turn-helix transcriptional regulator	gene-CWC46_RS02020	-0.631684	0.119278	0.716354	-0.213992	0.602417	0.986286	8.28535	0.184965	0.408812	1	RefSeq	+	CWC46_RS02020	CWC46_RS02020				Gene				CWC46_02020	Protein Homology	CDS	Genbank:WP_021013827.1	CDS	COORDINATES: protein motif:HMM:NF014376.1%2CHMM:NF024242.1
NZ_CP025085.1	intergenic	438750	438846		intergenic_NZ_CP025085.1-nt00438750	-0.56621	0.607239	1	0.0157665	1	1	6.25358	-0.259023	0.73588	1	SorTnSeq	+	intergenic_NZ_CP025085.1-nt00438750
NZ_CP025085.1	gene	438847	439791	DMT family transporter	gene-CWC46_RS02025	0.383674	0.18469	0.805114	-0.467341	0.210772	0.718687	8.58838	0.0577712	0.752864	1	RefSeq	+	CWC46_RS02025	CWC46_RS02025				Gene				CWC46_02025	Protein Homology	CDS	Genbank:WP_021013826.1	CDS	COORDINATES: similar to AA sequence:RefSeq:WP_009044391.1
NZ_CP025085.1	intergenic	439792	439885		intergenic_NZ_CP025085.1-nt00439792	-0.969573	0.359285	0.934991	-1.09497	0.16707	0.676331	6.50937	-0.0656491	0.887726	1	SorTnSeq	+	intergenic_NZ_CP025085.1-nt00439792
NZ_CP025085.1	pseudogene	439886	440319	MFS transporter	gene-CWC46_RS02030	-0.31526	1	1	0.344445	0.681378	1	6.54505	0.245928	0.666412	1	RefSeq	-	CWC46_RS02030	CWC46_RS02030			partialpseudo	Gene				CWC46_02030	Protein Homology	CDS		CDS	COORDINATES: similar to AA sequence:RefSeq:WP_010845019.1	frameshifted%3B incomplete%3B partial in the middle of a contig%3B missing N-terminus and C-terminus
NZ_CP025085.1	pseudogene	440287	440493	hypothetical protein	gene-CWC46_RS02035											RefSeq	+	CWC46_RS02035	CWC46_RS02035			partialpseudo	Gene				CWC46_02035	Protein Homology	CDS		CDS	COORDINATES: similar to AA sequence:RefSeq:WP_020230268.1	incomplete%3B partial in the middle of a contig%3B missing C-terminus
NZ_CP025085.1	intergenic	440494	440701		intergenic_NZ_CP025085.1-nt00440494	-1.8555	0.226563	0.835947	-0.130685	1	1	6.23183	0.205998	0.742831	1	SorTnSeq	+	intergenic_NZ_CP025085.1-nt00440494
NZ_CP025085.1	gene	440702	442303	hypothetical protein	gene-CWC46_RS02040	-0.740354	0.105346	0.716354	-0.48728	0.266417	0.767807	8.01391	-0.197932	0.401694	1	RefSeq	+	CWC46_RS02040	CWC46_RS02040				Gene				CWC46_02040	Protein Homology	CDS	Genbank:WP_021013823.1	CDS	COORDINATES: similar to AA sequence:RefSeq:WP_017338407.1
NZ_CP025085.1	intergenic	442304	442487		intergenic_NZ_CP025085.1-nt00442304	0.540731	0.523468	1	-1.31555	0.301759	0.790627	6.29603	-0.335572	0.499562	1	SorTnSeq	+	intergenic_NZ_CP025085.1-nt00442304
NZ_CP025085.1	gene	442488	442838	hypothetical protein	gene-CWC46_RS02045	-0.886733	0.307458	0.900935	-1.95853	0.0346902	0.427115	6.88781	0.366644	0.295418	1	RefSeq	+	CWC46_RS02045	CWC46_RS02045				Gene				CWC46_02045	Protein Homology	CDS	Genbank:WP_037380462.1	CDS	COORDINATES: similar to AA sequence:RefSeq:WP_015730192.1
NZ_CP025085.1	intergenic	442839	443184		intergenic_NZ_CP025085.1-nt00442839	0.0852693	1	1	-4.72755	0.0390627	0.438943	6.02037	-0.274545	0.711072	1	SorTnSeq	+	intergenic_NZ_CP025085.1-nt00442839
NZ_CP025085.1	gene	443185	443802	NmrA family NAD(P)-binding protein	gene-CWC46_RS02050	0.185627	0.760793	1	0.2758	0.65874	1	7.23197	-0.250212	0.505241	1	RefSeq	+	CWC46_RS02050	CWC46_RS02050				Gene				CWC46_02050	Protein Homology	CDS	Genbank:WP_071790840.1	CDS	COORDINATES: similar to AA sequence:RefSeq:WP_017802003.1
NZ_CP025085.1	intergenic	443803	443845		intergenic_NZ_CP025085.1-nt00443803											SorTnSeq	+	intergenic_NZ_CP025085.1-nt00443803
NZ_CP025085.1	gene	443846	444568	DsbA family protein	gene-CWC46_RS02055	-0.390435	0.627104	1	-0.70783	0.175467	0.683602	7.19865	0.0104487	1	1	RefSeq	-	CWC46_RS02055	CWC46_RS02055				Gene				CWC46_02055	Protein Homology	CDS	Genbank:WP_021013820.1	CDS	COORDINATES: similar to AA sequence:RefSeq:WP_004391594.1
NZ_CP025085.1	gene	444568	446592	DUF255 domain-containing protein	gene-CWC46_RS02060	-0.254856	0.566577	1	-0.563664	0.24805	0.761383	8.12982	0.245247	0.273932	1	RefSeq	-	CWC46_RS02060	CWC46_RS02060				Gene				CWC46_02060	Protein Homology	CDS	Genbank:WP_021013819.1	CDS	COORDINATES: similar to AA sequence:RefSeq:YP_005228700.1
NZ_CP025085.1	intergenic	446593	447293		intergenic_NZ_CP025085.1-nt00446593	0.369104	0.542386	1	-0.855413	0.175467	0.683602	7.31674	0.326289	0.30994	1	SorTnSeq	+	intergenic_NZ_CP025085.1-nt00446593
NZ_CP025085.1	gene	447294	448568	histidine-type phosphatase	gene-CWC46_RS02070	0.0731979	1	1	-1.51241	0.00352818	0.152449	7.62196	0.354687	0.224777	1	RefSeq	+	CWC46_RS02070	CWC46_RS02070				Gene				CWC46_02070	Protein Homology	CDS	Genbank:WP_021013817.1	CDS	COORDINATES: similar to AA sequence:RefSeq:WP_013315755.1
NZ_CP025085.1	intergenic	448569	448791		intergenic_NZ_CP025085.1-nt00448569	-0.305885	1	1	-0.428031	1	1	6.02035	0.724025	0.264933	1	SorTnSeq	+	intergenic_NZ_CP025085.1-nt00448569
NZ_CP025085.1	gene	448792	449976	MFS transporter	gene-CWC46_RS02075	-1.32979	0.110186	0.716354	-0.890526	0.242987	0.750875	7.23171	0.290971	0.416781	1	RefSeq	-	CWC46_RS02075	CWC46_RS02075				Gene				CWC46_02075	Protein Homology	CDS	Genbank:WP_021013816.1	CDS	COORDINATES: similar to AA sequence:RefSeq:WP_015841378.1
NZ_CP025085.1	intergenic	449977	450108		intergenic_NZ_CP025085.1-nt00449977											SorTnSeq	+	intergenic_NZ_CP025085.1-nt00449977
NZ_CP025085.1	gene	450109	451011	LysR family transcriptional regulator	gene-CWC46_RS02080	-1.22181	0.149614	0.747627	-0.376966	0.617721	0.992491	7.02033	-0.107081	0.909947	1	RefSeq	-	CWC46_RS02080	CWC46_RS02080				Gene				CWC46_02080	Protein Homology	CDS	Genbank:WP_021013815.1	CDS	COORDINATES: similar to AA sequence:RefSeq:WP_015855585.1
NZ_CP025085.1	intergenic	451012	451134		intergenic_NZ_CP025085.1-nt00451012											SorTnSeq	+	intergenic_NZ_CP025085.1-nt00451012
NZ_CP025085.1	gene	451135	451791	thermostable hemolysin	gene-CWC46_RS02085	-0.575298	0.424358	0.975577	-1.95853	0.0169008	0.320036	6.59683	-0.497071	0.220332	1	RefSeq	+	CWC46_RS02085	CWC46_RS02085				Gene				CWC46_02085	Protein Homology	CDS	Genbank:WP_021013814.1	CDS	COORDINATES: similar to AA sequence:RefSeq:WP_015855587.1
NZ_CP025085.1	gene	451769	453196	AMP-binding protein	gene-CWC46_RS02090	-0.765821	0.103425	0.716354	0.157846	0.656996	1	7.98831	0.0805571	0.814875	1	RefSeq	+	CWC46_RS02090	CWC46_RS02090				Gene				CWC46_02090	Protein Homology	CDS	Genbank:WP_021013813.1	CDS	COORDINATES: similar to AA sequence:RefSeq:WP_015855588.1
NZ_CP025085.1	intergenic	453197	453199		intergenic_NZ_CP025085.1-nt00453197											SorTnSeq	+	intergenic_NZ_CP025085.1-nt00453197
NZ_CP025085.1	gene	453200	453850	iron-containing redox enzyme family protein	gene-CWC46_RS02095	-1.02706	0.263177	0.875598	0.382459	0.57159	0.969395	6.80213	0.378812	0.44263	1	RefSeq	+	CWC46_RS02095	CWC46_RS02095				Gene				CWC46_02095	Protein Homology	CDS	Genbank:WP_021013812.1	CDS	COORDINATES: similar to AA sequence:RefSeq:WP_005897325.1
NZ_CP025085.1	intergenic	453851	453853		intergenic_NZ_CP025085.1-nt00453851											SorTnSeq	+	intergenic_NZ_CP025085.1-nt00453851
NZ_CP025085.1	gene	453854	454648	SDR family oxidoreductase	gene-CWC46_RS02100	-0.710229	0.34493	0.928106	-0.176762	0.860051	1	6.91537	-0.0559713	1	1	RefSeq	+	CWC46_RS02100	CWC46_RS02100				Gene				CWC46_02100	Protein Homology	CDS	Genbank:WP_021013811.1	CDS	COORDINATES: similar to AA sequence:RefSeq:WP_015855590.1
NZ_CP025085.1	intergenic	454649	454677		intergenic_NZ_CP025085.1-nt00454649											SorTnSeq	+	intergenic_NZ_CP025085.1-nt00454649
NZ_CP025085.1	gene	454678	455280	hypothetical protein	gene-CWC46_RS02105	-0.437029	0.607593	1	-1.038	0.0707567	0.535321	6.92891	-0.381599	0.342475	1	RefSeq	+	CWC46_RS02105	CWC46_RS02105				Gene				CWC46_02105	Protein Homology	CDS	Genbank:WP_037380990.1	CDS	COORDINATES: similar to AA sequence:RefSeq:WP_004720112.1
NZ_CP025085.1	intergenic	455281	455580		intergenic_NZ_CP025085.1-nt00455281											SorTnSeq	+	intergenic_NZ_CP025085.1-nt00455281
NZ_CP025085.1	gene	455581	455657	tRNA-Pro	gene-CWC46_RS02110											RefSeq	-	CWC46_RS02110	CWC46_RS02110				Gene				CWC46_02110	tRNAscan-SE	tRNA		tRNA	COORDINATES: profile:tRNAscan-SE:2.0.4
NZ_CP025085.1	intergenic	455658	455997		intergenic_NZ_CP025085.1-nt00455658	-1.8555	0.226563	0.835947	-0.527168	0.790528	1	6.16472	0.0644343	1	1	SorTnSeq	+	intergenic_NZ_CP025085.1-nt00455658
NZ_CP025085.1	gene	455998	457686	NAD-dependent DNA ligase LigB	gene-CWC46_RS02115	-0.366673	0.353334	0.934991	-0.360451	0.421529	0.895847	8.33712	-0.0230408	1	1	RefSeq	-	ligB	CWC46_RS02115				Gene	ligB			CWC46_02115	Protein Homology	CDS	Genbank:WP_021013808.1	CDS	COORDINATES: similar to AA sequence:RefSeq:WP_016942720.1
NZ_CP025085.1	intergenic	457687	458063		intergenic_NZ_CP025085.1-nt00457687	-0.162922	1	1	0.970807	0.266847	0.767807	5.83139	-0.0289642	1	1	SorTnSeq	+	intergenic_NZ_CP025085.1-nt00457687
NZ_CP025085.1	gene	458064	458687	guanylate kinase	gene-CWC46_RS02120											RefSeq	+	gmk	CWC46_RS02120				Gene	gmk			CWC46_02120	Protein Homology	CDS	Genbank:WP_021013807.1	CDS	COORDINATES: similar to AA sequence:RefSeq:WP_000046969.1
NZ_CP025085.1	intergenic	458688	458740		intergenic_NZ_CP025085.1-nt00458688											SorTnSeq	+	intergenic_NZ_CP025085.1-nt00458688
NZ_CP025085.1	gene	458741	459016	DNA-directed RNA polymerase subunit omega	gene-CWC46_RS02125											RefSeq	+	rpoZ	CWC46_RS02125				Gene	rpoZ			CWC46_02125	Protein Homology	CDS	Genbank:WP_021013806.1	CDS	COORDINATES: similar to AA sequence:RefSeq:WP_013511051.1
NZ_CP025085.1	intergenic	459017	459034		intergenic_NZ_CP025085.1-nt00459017											SorTnSeq	+	intergenic_NZ_CP025085.1-nt00459017
NZ_CP025085.1	gene	459035	461137	bifunctional GTP diphosphokinase/guanosine-3'%2C5'-bis pyrophosphate 3'-pyrophosphohydrolase	gene-CWC46_RS02130											RefSeq	+	spoT	CWC46_RS02130				Gene	spoT			CWC46_02130	Protein Homology	CDS	Genbank:WP_021013805.1	CDS	COORDINATES: similar to AA sequence:RefSeq:WP_016603963.1
NZ_CP025085.1	intergenic	461138	461143		intergenic_NZ_CP025085.1-nt00461138											SorTnSeq	+	intergenic_NZ_CP025085.1-nt00461138
NZ_CP025085.1	gene	461144	461563	RNA methyltransferase TrmH	gene-CWC46_RS02135											RefSeq	+	CWC46_RS02135	CWC46_RS02135				Gene				CWC46_02135	Protein Homology	CDS	Genbank:WP_021013804.1	CDS	COORDINATES: similar to AA sequence:RefSeq:WP_015855596.1
NZ_CP025085.1	gene	461563	463644	ATP-dependent DNA helicase RecG	gene-CWC46_RS02140	-0.00440146	1	1	-5.12891	0.00634773	0.210208	6.39689	0.137516	0.880397	1	RefSeq	+	recG	CWC46_RS02140				Gene	recG			CWC46_02140	Protein Homology	CDS	Genbank:WP_021013803.1	CDS	COORDINATES: similar to AA sequence:RefSeq:WP_004953393.1
NZ_CP025085.1	intergenic	463645	463799		intergenic_NZ_CP025085.1-nt00463645											SorTnSeq	+	intergenic_NZ_CP025085.1-nt00463645
NZ_CP025085.1	gene	463800	465191	uracil-xanthine permease	gene-CWC46_RS02145	0.0821812	0.902159	1	-0.953327	0.0580659	0.506895	7.63867	-0.249875	0.323256	1	RefSeq	+	CWC46_RS02145	CWC46_RS02145				Gene				CWC46_02145	Protein Homology	CDS	Genbank:WP_021013802.1	CDS	COORDINATES: similar to AA sequence:RefSeq:WP_016942715.1
NZ_CP025085.1	intergenic	465192	465350		intergenic_NZ_CP025085.1-nt00465192											SorTnSeq	+	intergenic_NZ_CP025085.1-nt00465192
NZ_CP025085.1	gene	465351	467069	AsmA family protein	gene-CWC46_RS02150	0.119952	0.807196	1	-0.270572	0.614658	0.992491	7.8241	0.021311	1	1	RefSeq	+	CWC46_RS02150	CWC46_RS02150				Gene				CWC46_02150	Protein Homology	CDS	Genbank:WP_021013801.1	CDS	COORDINATES: similar to AA sequence:RefSeq:WP_015848440.1
NZ_CP025085.1	intergenic	467070	467222		intergenic_NZ_CP025085.1-nt00467070											SorTnSeq	+	intergenic_NZ_CP025085.1-nt00467070
NZ_CP025085.1	gene	467223	468164	fatty acid biosynthesis protein FabY	gene-CWC46_RS02155	-1.12801	0.0659955	0.644721	-0.85072	0.143868	0.636147	7.34725	-0.208106	0.5584	1	RefSeq	-	fabY	CWC46_RS02155				Gene	fabY	yiiD		CWC46_02155	Protein Homology	CDS	Genbank:WP_021013800.1	CDS	COORDINATES: similar to AA sequence:RefSeq:WP_015848441.1
NZ_CP025085.1	intergenic	468165	468203		intergenic_NZ_CP025085.1-nt00468165											SorTnSeq	+	intergenic_NZ_CP025085.1-nt00468165
NZ_CP025085.1	gene	468204	468641	D-tyrosyl-tRNA(Tyr) deacylase	gene-CWC46_RS02160	0.512702	0.774414	1	-4.29976	0.125	0.608972	5.83134	-0.176115	0.831812	1	RefSeq	-	dtd	CWC46_RS02160				Gene	dtd			CWC46_02160	Protein Homology	CDS	Genbank:WP_021013799.1	CDS	COORDINATES: similar to AA sequence:RefSeq:WP_012147545.1
NZ_CP025085.1	intergenic	468642	468720		intergenic_NZ_CP025085.1-nt00468642											SorTnSeq	+	intergenic_NZ_CP025085.1-nt00468642
NZ_CP025085.1	gene	468721	469332	glucose-1-phosphatase	gene-CWC46_RS02165	-0.0395713	1	1	-0.318233	0.63583	0.999559	7.17616	-0.112395	0.826407	1	RefSeq	-	yihX	CWC46_RS02165				Gene	yihX			CWC46_02165	Protein Homology	CDS	Genbank:WP_021013798.1	CDS	COORDINATES: similar to AA sequence:RefSeq:WP_014702092.1
NZ_CP025085.1	intergenic	469333	469504		intergenic_NZ_CP025085.1-nt00469333											SorTnSeq	+	intergenic_NZ_CP025085.1-nt00469333
NZ_CP025085.1	gene	469505	471331	ribosome-dependent GTPase TypA	gene-CWC46_RS02170	-0.00443875	1	1	-0.132799	1	1	6.95563	0.432121	0.281983	1	RefSeq	-	typA	CWC46_RS02170				Gene	typA			CWC46_02170	Protein Homology	CDS	Genbank:WP_021013797.1	CDS	COORDINATES: similar to AA sequence:RefSeq:WP_015848444.1
NZ_CP025085.1	intergenic	471332	471703		intergenic_NZ_CP025085.1-nt00471332	-4.00085	0.21875	0.835947	0.660128	0.548829	0.954912	5.80219	0.224823	1	1	SorTnSeq	+	intergenic_NZ_CP025085.1-nt00471332
NZ_CP025085.1	gene	471704	473113	glutamate--ammonia ligase	gene-CWC46_RS02175											RefSeq	+	glnA	CWC46_RS02175				Gene	glnA			CWC46_02175	Protein Homology	CDS	Genbank:WP_021013796.1	CDS	COORDINATES: similar to AA sequence:RefSeq:WP_017801615.1
NZ_CP025085.1	intergenic	473114	473313		intergenic_NZ_CP025085.1-nt00473114											SorTnSeq	+	intergenic_NZ_CP025085.1-nt00473114
NZ_CP025085.1	gene	473314	474363	nitrogen regulation protein NR(II)	gene-CWC46_RS02180	-3.74728	1.43006e-05	0.00400178	-0.362047	0.511846	0.939907	7.60512	0.0567562	0.930686	1	RefSeq	+	glnL	CWC46_RS02180				Gene	glnL			CWC46_02180	Protein Homology	CDS	Genbank:WP_021013795.1	CDS	COORDINATES: similar to AA sequence:RefSeq:WP_002213151.1
NZ_CP025085.1	intergenic	474364	474371		intergenic_NZ_CP025085.1-nt00474364											SorTnSeq	+	intergenic_NZ_CP025085.1-nt00474364
NZ_CP025085.1	gene	474372	475784	nitrogen regulation protein NR(I)	gene-CWC46_RS02185	-1.65331	0.0045341	0.217507	-0.80387	0.104792	0.608972	7.69503	0.121034	0.67494	1	RefSeq	+	glnG	CWC46_RS02185				Gene	glnG			CWC46_02185	Protein Homology	CDS	Genbank:WP_021013794.1	CDS	COORDINATES: similar to AA sequence:RefSeq:WP_012133942.1
NZ_CP025085.1	intergenic	475785	475931		intergenic_NZ_CP025085.1-nt00475785											SorTnSeq	+	intergenic_NZ_CP025085.1-nt00475785
NZ_CP025085.1	gene	475932	476054	YshB family small membrane protein	gene-CWC46_RS22770											RefSeq	+	yshB	CWC46_RS22770				Gene	yshB				Protein Homology	CDS	Genbank:WP_021013793.1	CDS	COORDINATES: similar to AA sequence:RefSeq:WP_007872049.1
NZ_CP025085.1	intergenic	476055	476111		intergenic_NZ_CP025085.1-nt00476055											SorTnSeq	+	intergenic_NZ_CP025085.1-nt00476055
NZ_CP025085.1	gene	476112	477485	oxygen-independent coproporphyrinogen III oxidase	gene-CWC46_RS02190	-0.0595418	0.930157	1	-0.190108	0.484728	0.929061	8.80939	0.19675	0.250546	1	RefSeq	-	hemN	CWC46_RS02190				Gene	hemN			CWC46_02190	Protein Homology	CDS	Genbank:WP_021013792.1	CDS	COORDINATES: similar to AA sequence:RefSeq:WP_005121847.1
NZ_CP025085.1	intergenic	477486	477666		intergenic_NZ_CP025085.1-nt00477486	-1.26327	0.30566	0.900935	0.527751	0.681378	1	6.35743	-0.32705	0.633985	1	SorTnSeq	+	intergenic_NZ_CP025085.1-nt00477486
NZ_CP025085.1	gene	477667	478191	Der GTPase-activating protein YihI	gene-CWC46_RS02195	-0.579283	0.310507	0.900935	0.170151	0.765993	1	7.16477	-0.250212	0.505241	1	RefSeq	-	yihI	CWC46_RS02195				Gene	yihI			CWC46_02195	Protein Homology	CDS	Genbank:WP_021013791.1	CDS	COORDINATES: similar to AA sequence:RefSeq:WP_014913633.1
NZ_CP025085.1	intergenic	478192	478416		intergenic_NZ_CP025085.1-nt00478192	-0.953022	0.581055	1	-0.527168	0.607239	0.986286	6.18745	0.0644342	1	1	SorTnSeq	+	intergenic_NZ_CP025085.1-nt00478192
NZ_CP025085.1	gene	478417	479052	YihA family ribosome biogenesis GTP-binding protein	gene-CWC46_RS02200											RefSeq	+	CWC46_RS02200	CWC46_RS02200				Gene				CWC46_02200	Protein Homology	CDS	Genbank:WP_021013790.1	CDS	COORDINATES: similar to AA sequence:RefSeq:WP_015842306.1
NZ_CP025085.1	intergenic	479053	479500		intergenic_NZ_CP025085.1-nt00479053	-3.46026	0.25	0.861321	-3.48508	0.25	0.761797	5.50937	0.529146	0.607239	1	SorTnSeq	+	intergenic_NZ_CP025085.1-nt00479053
NZ_CP025085.1	gene	479501	482290	DNA polymerase I	gene-CWC46_RS02205											RefSeq	-	polA	CWC46_RS02205				Gene	polA			CWC46_02205	Protein Homology	CDS	Genbank:WP_021013789.1	CDS	COORDINATES: similar to AA sequence:RefSeq:WP_010298116.1
NZ_CP025085.1	intergenic	482291	482662		intergenic_NZ_CP025085.1-nt00482291	0.651894	0.184854	0.805114	0.856381	0.0327672	0.42306	7.62235	0.0902684	0.770922	1	SorTnSeq	+	intergenic_NZ_CP025085.1-nt00482291
NZ_CP025085.1	gene	482663	483286	thiol:disulfide interchange protein DsbA	gene-CWC46_RS02210	0.0336717	0.907562	1	0.0467743	1	1	8.01403	0.0837845	0.752694	1	RefSeq	-	dsbA	CWC46_RS02210				Gene	dsbA			CWC46_02210	Protein Homology	CDS	Genbank:WP_021013788.1	CDS	COORDINATES: similar to AA sequence:RefSeq:WP_019080347.1
NZ_CP025085.1	intergenic	483287	483312		intergenic_NZ_CP025085.1-nt00483287											SorTnSeq	+	intergenic_NZ_CP025085.1-nt00483287
NZ_CP025085.1	gene	483313	484299	serine/threonine protein kinase	gene-CWC46_RS02215	-0.437029	0.607593	1	-0.210219	0.742831	1	7.18745	0.211997	0.594293	1	RefSeq	-	CWC46_RS02215	CWC46_RS02215				Gene				CWC46_02215	Protein Homology	CDS	Genbank:WP_037380986.1	CDS	COORDINATES: similar to AA sequence:RefSeq:WP_019084375.1
NZ_CP025085.1	intergenic	484300	484362		intergenic_NZ_CP025085.1-nt00484300											SorTnSeq	+	intergenic_NZ_CP025085.1-nt00484300
NZ_CP025085.1	gene	484363	484632	YihD family protein	gene-CWC46_RS02220											RefSeq	-	CWC46_RS02220	CWC46_RS02220				Gene				CWC46_02220	Protein Homology	CDS	Genbank:WP_021013786.1	CDS	COORDINATES: similar to AA sequence:RefSeq:WP_005968263.1
NZ_CP025085.1	intergenic	484633	484752		intergenic_NZ_CP025085.1-nt00484633											SorTnSeq	+	intergenic_NZ_CP025085.1-nt00484633
NZ_CP025085.1	gene	484753	485331	molybdenum cofactor guanylyltransferase MobA	gene-CWC46_RS02225	-0.969573	0.359285	0.934991	-1.09497	0.263177	0.767807	6.56246	0.0896362	1	1	RefSeq	+	mobA	CWC46_RS02225				Gene	mobA			CWC46_02225	Protein Homology	CDS	Genbank:WP_021013785.1	CDS	COORDINATES: similar to AA sequence:RefSeq:WP_015855616.1
NZ_CP025085.1	gene	485321	485845	molybdopterin-guanine dinucleotide biosynthesis protein B	gene-CWC46_RS02230	0.0852696	1	1	-0.437466	0.790528	1	6.29599	0.425948	0.417695	1	RefSeq	+	mobB	CWC46_RS02230				Gene	mobB			CWC46_02230	Protein Homology	CDS	Genbank:WP_021013784.1	CDS	COORDINATES: similar to AA sequence:RefSeq:WP_011091665.1
NZ_CP025085.1	intergenic	485846	486002		intergenic_NZ_CP025085.1-nt00485846											SorTnSeq	+	intergenic_NZ_CP025085.1-nt00485846
NZ_CP025085.1	gene	486003	486118	5S ribosomal RNA	gene-CWC46_RS02235											RefSeq	-	rrf	CWC46_RS02235				Gene	rrf			CWC46_02235	cmsearch	rRNA	RFAM:RF00001	rRNA	COORDINATES: profile:INFERNAL:1.1.1
NZ_CP025085.1	intergenic	486119	486211		intergenic_NZ_CP025085.1-nt00486119											SorTnSeq	+	intergenic_NZ_CP025085.1-nt00486119
NZ_CP025085.1	gene	486212	489147	23S ribosomal RNA	gene-CWC46_RS02240											RefSeq	-	CWC46_RS02240	CWC46_RS02240				Gene				CWC46_02240	RefSeq	rRNA		rRNA
NZ_CP025085.1	intergenic	489148	489477		intergenic_NZ_CP025085.1-nt00489148											SorTnSeq	+	intergenic_NZ_CP025085.1-nt00489148
NZ_CP025085.1	gene	489478	489553	tRNA-Glu	gene-CWC46_RS02245											RefSeq	-	CWC46_RS02245	CWC46_RS02245				Gene				CWC46_02245	tRNAscan-SE	tRNA		tRNA	COORDINATES: profile:tRNAscan-SE:2.0.4
NZ_CP025085.1	intergenic	489554	489627		intergenic_NZ_CP025085.1-nt00489554											SorTnSeq	+	intergenic_NZ_CP025085.1-nt00489554
NZ_CP025085.1	gene	489628	491177	16S ribosomal RNA	gene-CWC46_RS02250											RefSeq	-	CWC46_RS02250	CWC46_RS02250				Gene				CWC46_02250	RefSeq	rRNA		rRNA
NZ_CP025085.1	intergenic	491178	491779		intergenic_NZ_CP025085.1-nt00491178	-0.767803	0.548829	1	-0.341815	1	1	6.07011	0.0102778	1	1	SorTnSeq	+	intergenic_NZ_CP025085.1-nt00491178
NZ_CP025085.1	gene	491780	493369	bifunctional phosphoribosylaminoimidazolecarboxamide formyltransferase/IMP cyclohydrolase	gene-CWC46_RS02255	0.179433	0.687889	1	-0.119845	0.681746	1	8.31159	0.0161577	1	1	RefSeq	+	purH	CWC46_RS02255				Gene	purH			CWC46_02255	Protein Homology	CDS	Genbank:WP_021014071.1	CDS	COORDINATES: similar to AA sequence:RefSeq:WP_005132841.1
NZ_CP025085.1	intergenic	493370	493384		intergenic_NZ_CP025085.1-nt00493370											SorTnSeq	+	intergenic_NZ_CP025085.1-nt00493370
NZ_CP025085.1	gene	493385	494671	phosphoribosylamine--glycine ligase	gene-CWC46_RS02260	-0.483793	0.401065	0.965527	-0.477685	0.410106	0.88733	7.63859	0.218716	0.378696	1	RefSeq	+	purD	CWC46_RS02260				Gene	purD			CWC46_02260	Protein Homology	CDS	Genbank:WP_021014070.1	CDS	COORDINATES: similar to AA sequence:RefSeq:WP_009114797.1
NZ_CP025085.1	intergenic	494672	494804		intergenic_NZ_CP025085.1-nt00494672											SorTnSeq	+	intergenic_NZ_CP025085.1-nt00494672
NZ_CP025085.1	gene	494805	495518	DUF1481 domain-containing protein	gene-CWC46_RS02265	-0.684625	0.523468	1	0.327152	0.584666	0.971935	6.77245	0.159802	0.794845	1	RefSeq	-	CWC46_RS02265	CWC46_RS02265				Gene				CWC46_02265	Protein Homology	CDS	Genbank:WP_037380499.1	CDS	COORDINATES: similar to AA sequence:RefSeq:WP_013315948.1
NZ_CP025085.1	intergenic	495519	495522		intergenic_NZ_CP025085.1-nt00495519											SorTnSeq	+	intergenic_NZ_CP025085.1-nt00495519
NZ_CP025085.1	gene	495523	495795	DNA-binding protein HU-alpha	gene-CWC46_RS02270											RefSeq	-	hupA	CWC46_RS02270				Gene	hupA			CWC46_02270	Protein Homology	CDS	Genbank:WP_021014068.1	CDS	COORDINATES: similar to AA sequence:RefSeq:WP_017460010.1
NZ_CP025085.1	intergenic	495796	495979		intergenic_NZ_CP025085.1-nt00495796											SorTnSeq	+	intergenic_NZ_CP025085.1-nt00495796
NZ_CP025085.1	gene	495980	496570	YjaG family protein	gene-CWC46_RS02275											RefSeq	-	CWC46_RS02275	CWC46_RS02275				Gene				CWC46_02275	Protein Homology	CDS	Genbank:WP_021014067.1	CDS	COORDINATES: similar to AA sequence:RefSeq:WP_004957783.1
NZ_CP025085.1	intergenic	496571	496668		intergenic_NZ_CP025085.1-nt00496571											SorTnSeq	+	intergenic_NZ_CP025085.1-nt00496571
NZ_CP025085.1	gene	496669	497337	deoxyribonuclease V	gene-CWC46_RS02280	-2.5886	0.0135151	0.376108	-0.86538	0.194207	0.700732	6.63031	0.0152389	1	1	RefSeq	-	nfi	CWC46_RS02280				Gene	nfi			CWC46_02280	Protein Homology	CDS	Genbank:WP_037380496.1	CDS	COORDINATES: similar to AA sequence:RefSeq:WP_010301765.1
NZ_CP025085.1	gene	497334	498404	uroporphyrinogen decarboxylase	gene-CWC46_RS02285											RefSeq	-	hemE	CWC46_RS02285				Gene	hemE			CWC46_02285	Protein Homology	CDS	Genbank:WP_021014065.1	CDS	COORDINATES: similar to AA sequence:RefSeq:WP_019846610.1
NZ_CP025085.1	intergenic	498405	498510		intergenic_NZ_CP025085.1-nt00498405											SorTnSeq	+	intergenic_NZ_CP025085.1-nt00498405
NZ_CP025085.1	gene	498511	499284	NAD(+) diphosphatase	gene-CWC46_RS02290	-2.20736	0.00592478	0.264098	-1.07491	0.162757	0.668686	7.02024	-0.00800847	1	1	RefSeq	-	nudC	CWC46_RS02290				Gene	nudC			CWC46_02290	Protein Homology	CDS	Genbank:WP_021014064.1	CDS	COORDINATES: similar to AA sequence:RefSeq:WP_019846609.1
NZ_CP025085.1	intergenic	499285	499386		intergenic_NZ_CP025085.1-nt00499285											SorTnSeq	+	intergenic_NZ_CP025085.1-nt00499285
NZ_CP025085.1	gene	499387	499848	Rsd/AlgQ family anti-sigma factor	gene-CWC46_RS02295	-0.312448	1	1	-0.437466	0.790528	1	6.14167	-0.00150264	1	1	RefSeq	+	CWC46_RS02295	CWC46_RS02295				Gene				CWC46_02295	Protein Homology	CDS	Genbank:WP_021014063.1	CDS	COORDINATES: similar to AA sequence:RefSeq:WP_010301755.1
NZ_CP025085.1	intergenic	499849	499962		intergenic_NZ_CP025085.1-nt00499849											SorTnSeq	+	intergenic_NZ_CP025085.1-nt00499849
NZ_CP025085.1	riboswitch	499963	500078		id-NZ_CP025085.1:499963..500078	0.283214	0.790528	1	0.157114	1	1	5.94243	-0.688574	0.28628	1	cmsearch	+		riboswitch	thiamine pyrophosphate	RFAM:RF00059	riboswitch	regulatory			TPP riboswitch
NZ_CP025085.1	intergenic	500079	500185		intergenic_NZ_CP025085.1-nt00500079											SorTnSeq	+	intergenic_NZ_CP025085.1-nt00500079
NZ_CP025085.1	gene	500186	502117	phosphomethylpyrimidine synthase ThiC	gene-CWC46_RS02300	-0.0367073	1	1	-0.376831	0.450553	0.907018	8.18744	-0.0156896	1	1	RefSeq	+	thiC	CWC46_RS02300				Gene	thiC			CWC46_02300	Protein Homology	CDS	Genbank:WP_021014062.1	CDS	COORDINATES: similar to AA sequence:RefSeq:WP_015855366.1
NZ_CP025085.1	gene	502117	502752	thiamine phosphate synthase	gene-CWC46_RS02305	-0.1892	1	1	-0.484979	0.5224	0.947434	7.19868	0.0148013	1	1	RefSeq	+	thiE	CWC46_RS02305				Gene	thiE			CWC46_02305	Protein Homology	CDS	Genbank:WP_021014061.1	CDS	COORDINATES: similar to AA sequence:RefSeq:WP_012822039.1
NZ_CP025085.1	intergenic	502753	502753		intergenic_NZ_CP025085.1-nt00502753											SorTnSeq	+	intergenic_NZ_CP025085.1-nt00502753
NZ_CP025085.1	gene	502754	503503	HesA/MoeB/ThiF family protein	gene-CWC46_RS02310	-0.223034	0.693953	1	0.0545116	1	1	6.80218	0.010298	1	1	RefSeq	+	CWC46_RS02310	CWC46_RS02310				Gene				CWC46_02310	Protein Homology	CDS	Genbank:WP_021014060.1	CDS	COORDINATES: similar to AA sequence:RefSeq:WP_015855368.1
NZ_CP025085.1	gene	503500	503700	sulfur carrier protein ThiS	gene-CWC46_RS02315	-1.0654	0.453125	0.982097	-4.02644	0.21875	0.723946	5.74204	0.336728	0.831812	1	RefSeq	+	thiS	CWC46_RS02315				Gene	thiS			CWC46_02315	Protein Homology	CDS	Genbank:WP_021014059.1	CDS	COORDINATES: similar to AA sequence:RefSeq:WP_004953956.1
NZ_CP025085.1	gene	503701	504483	thiazole synthase	gene-CWC46_RS02320	-1.29468	0.0707567	0.644721	-1.42158	0.0501034	0.48224	7.00754	-0.145144	0.737557	1	RefSeq	+	CWC46_RS02320	CWC46_RS02320				Gene				CWC46_02320	Protein Homology	CDS	Genbank:WP_021014058.1	CDS	COORDINATES: similar to AA sequence:RefSeq:WP_015848176.1
NZ_CP025085.1	gene	504483	505619	2-iminoacetate synthase ThiH	gene-CWC46_RS02325	-1.15081	0.0895325	0.694008	-0.806035	0.26819	0.767807	7.17607	-0.149173	0.675226	1	RefSeq	+	thiH	CWC46_RS02325				Gene	thiH			CWC46_02325	Protein Homology	CDS	Genbank:WP_021014057.1	CDS	COORDINATES: similar to AA sequence:RefSeq:WP_015855371.1
NZ_CP025085.1	intergenic	505620	505660		intergenic_NZ_CP025085.1-nt00505620											SorTnSeq	+	intergenic_NZ_CP025085.1-nt00505620
NZ_CP025085.1	gene	505661	507094	PLP-dependent aminotransferase family protein	gene-CWC46_RS02330	-0.004477	1	1	-0.709411	0.222055	0.726294	7.43535	0.138849	0.699179	1	RefSeq	-	CWC46_RS02330	CWC46_RS02330				Gene				CWC46_02330	Protein Homology	CDS	Genbank:WP_021014056.1	CDS	COORDINATES: similar to AA sequence:RefSeq:WP_015848178.1
NZ_CP025085.1	intergenic	507095	507268		intergenic_NZ_CP025085.1-nt00507095											SorTnSeq	+	intergenic_NZ_CP025085.1-nt00507095
NZ_CP025085.1	gene	507269	507460	DUF1127 domain-containing protein	gene-CWC46_RS02335	1.09717	0.266847	0.875598	0.263645	1	1	5.99487	0.537444	0.541257	1	RefSeq	+	CWC46_RS02335	CWC46_RS02335				Gene				CWC46_02335	Protein Homology	CDS	Genbank:WP_021014055.1	CDS	COORDINATES: protein motif:HMM:NF018294.1
NZ_CP025085.1	intergenic	507461	507835		intergenic_NZ_CP025085.1-nt00507461	0.944435	0.753907	1	-0.126007	1	1	5.94239	0.791382	0.307458	1	SorTnSeq	+	intergenic_NZ_CP025085.1-nt00507461
NZ_CP025085.1	gene	507836	508936	DUF1176 domain-containing protein	gene-CWC46_RS02340	-0.737868	0.404874	0.965527	-0.298408	0.690039	1	6.92885	0.580359	0.124922	1	RefSeq	-	CWC46_RS02340	CWC46_RS02340				Gene				CWC46_02340	Protein Homology	CDS	Genbank:WP_021014054.1	CDS	COORDINATES: similar to AA sequence:RefSeq:WP_015848184.1
NZ_CP025085.1	intergenic	508937	509128		intergenic_NZ_CP025085.1-nt00508937											SorTnSeq	+	intergenic_NZ_CP025085.1-nt00508937
NZ_CP025085.1	gene	509129	513352	DNA-directed RNA polymerase subunit beta'	gene-CWC46_RS02345											RefSeq	-	rpoC	CWC46_RS02345				Gene	rpoC			CWC46_02345	Protein Homology	CDS	Genbank:WP_021014053.1	CDS	COORDINATES: similar to AA sequence:RefSeq:WP_004957749.1
NZ_CP025085.1	intergenic	513353	513445		intergenic_NZ_CP025085.1-nt00513353											SorTnSeq	+	intergenic_NZ_CP025085.1-nt00513353
NZ_CP025085.1	gene	513446	517474	DNA-directed RNA polymerase subunit beta	gene-CWC46_RS02350											RefSeq	-	rpoB	CWC46_RS02350				Gene	rpoB			CWC46_02350	Protein Homology	CDS	Genbank:WP_021014052.1	CDS	COORDINATES: similar to AA sequence:RefSeq:WP_004870488.1
NZ_CP025085.1	intergenic	517475	517808		intergenic_NZ_CP025085.1-nt00517475											SorTnSeq	+	intergenic_NZ_CP025085.1-nt00517475
NZ_CP025085.1	gene	517809	518177	50S ribosomal protein L7/L12	gene-CWC46_RS02355											RefSeq	-	rplL	CWC46_RS02355				Gene	rplL			CWC46_02355	Protein Homology	CDS	Genbank:WP_021014051.1	CDS	COORDINATES: similar to AA sequence:RefSeq:WP_005122872.1
NZ_CP025085.1	intergenic	518178	518243		intergenic_NZ_CP025085.1-nt00518178											SorTnSeq	+	intergenic_NZ_CP025085.1-nt00518178
NZ_CP025085.1	gene	518244	518741	50S ribosomal protein L10	gene-CWC46_RS02360											RefSeq	-	rplJ	CWC46_RS02360				Gene	rplJ			CWC46_02360	Protein Homology	CDS	Genbank:WP_021014050.1	CDS	COORDINATES: similar to AA sequence:RefSeq:WP_002438625.1
NZ_CP025085.1	intergenic	518742	519058		intergenic_NZ_CP025085.1-nt00518742											SorTnSeq	+	intergenic_NZ_CP025085.1-nt00518742
NZ_CP025085.1	gene	519059	519763	50S ribosomal protein L1	gene-CWC46_RS02365											RefSeq	-	rplA	CWC46_RS02365				Gene	rplA			CWC46_02365	Protein Homology	CDS	Genbank:WP_021014049.1	CDS	COORDINATES: similar to AA sequence:RefSeq:WP_009114818.1
NZ_CP025085.1	intergenic	519764	519766		intergenic_NZ_CP025085.1-nt00519764											SorTnSeq	+	intergenic_NZ_CP025085.1-nt00519764
NZ_CP025085.1	gene	519767	520195	50S ribosomal protein L11	gene-CWC46_RS02370											RefSeq	-	rplK	CWC46_RS02370				Gene	rplK			CWC46_02370	Protein Homology	CDS	Genbank:WP_021014048.1	CDS	COORDINATES: similar to AA sequence:RefSeq:WP_006121495.1
NZ_CP025085.1	intergenic	520196	520356		intergenic_NZ_CP025085.1-nt00520196											SorTnSeq	+	intergenic_NZ_CP025085.1-nt00520196
NZ_CP025085.1	gene	520357	520902	transcription termination/antitermination protein NusG	gene-CWC46_RS02375											RefSeq	-	nusG	CWC46_RS02375				Gene	nusG			CWC46_02375	Protein Homology	CDS	Genbank:WP_021014047.1	CDS	COORDINATES: similar to AA sequence:RefSeq:WP_004953928.1
NZ_CP025085.1	intergenic	520903	520903		intergenic_NZ_CP025085.1-nt00520903											SorTnSeq	+	intergenic_NZ_CP025085.1-nt00520903
NZ_CP025085.1	gene	520904	521287	preprotein translocase subunit SecE	gene-CWC46_RS02380											RefSeq	-	secE	CWC46_RS02380				Gene	secE			CWC46_02380	Protein Homology	CDS	Genbank:WP_021014046.1	CDS	COORDINATES: similar to AA sequence:RefSeq:WP_007665874.1
NZ_CP025085.1	intergenic	521288	521524		intergenic_NZ_CP025085.1-nt00521288											SorTnSeq	+	intergenic_NZ_CP025085.1-nt00521288
NZ_CP025085.1	gene	521525	522709	elongation factor Tu	gene-CWC46_RS02385											RefSeq	-	tuf	CWC46_RS02385				Gene	tuf			CWC46_02385	Protein Homology	CDS	Genbank:WP_021013352.1	CDS	COORDINATES: similar to AA sequence:RefSeq:NP_312930.1
NZ_CP025085.1	intergenic	522710	522813		intergenic_NZ_CP025085.1-nt00522710											SorTnSeq	+	intergenic_NZ_CP025085.1-nt00522710
NZ_CP025085.1	gene	522814	522889	tRNA-Thr	gene-CWC46_RS02390											RefSeq	-	CWC46_RS02390	CWC46_RS02390				Gene				CWC46_02390	tRNAscan-SE	tRNA		tRNA	COORDINATES: profile:tRNAscan-SE:2.0.4
NZ_CP025085.1	intergenic	522890	522895		intergenic_NZ_CP025085.1-nt00522890											SorTnSeq	+	intergenic_NZ_CP025085.1-nt00522890
NZ_CP025085.1	gene	522896	522970	tRNA-Gly	gene-CWC46_RS02395											RefSeq	-	CWC46_RS02395	CWC46_RS02395				Gene				CWC46_02395	tRNAscan-SE	tRNA		tRNA	COORDINATES: profile:tRNAscan-SE:2.0.4
NZ_CP025085.1	intergenic	522971	523098		intergenic_NZ_CP025085.1-nt00522971											SorTnSeq	+	intergenic_NZ_CP025085.1-nt00522971
NZ_CP025085.1	gene	523099	523183	tRNA-Tyr	gene-CWC46_RS02400											RefSeq	-	CWC46_RS02400	CWC46_RS02400				Gene				CWC46_02400	tRNAscan-SE	tRNA		tRNA	COORDINATES: profile:tRNAscan-SE:2.0.4
NZ_CP025085.1	intergenic	523184	523199		intergenic_NZ_CP025085.1-nt00523184											SorTnSeq	+	intergenic_NZ_CP025085.1-nt00523184
NZ_CP025085.1	gene	523200	523275	tRNA-Thr	gene-CWC46_RS02405											RefSeq	-	CWC46_RS02405	CWC46_RS02405				Gene				CWC46_02405	tRNAscan-SE	tRNA		tRNA	COORDINATES: profile:tRNAscan-SE:2.0.4
NZ_CP025085.1	intergenic	523276	523658		intergenic_NZ_CP025085.1-nt00523276	-1.13559	0.189248	0.809205	0.273887	0.720101	1	6.80217	0.189971	0.703539	1	SorTnSeq	+	intergenic_NZ_CP025085.1-nt00523276
NZ_CP025085.1	gene	523659	524207	GNAT family N-acetyltransferase	gene-CWC46_RS02410	-0.144078	0.754655	1	-0.920449	0.0275359	0.391803	8.21527	-0.0812799	0.723778	1	RefSeq	+	CWC46_RS02410	CWC46_RS02410				Gene				CWC46_02410	Protein Homology	CDS	Genbank:WP_021014045.1	CDS	COORDINATES: similar to AA sequence:RefSeq:WP_012772930.1
NZ_CP025085.1	intergenic	524208	524425		intergenic_NZ_CP025085.1-nt00524208	-1.39817	0.332307	0.921205	-2.41711	0.0768134	0.553711	6.33717	-0.179062	0.880397	1	SorTnSeq	+	intergenic_NZ_CP025085.1-nt00524208
NZ_CP025085.1	gene	524426	525376	type I pantothenate kinase	gene-CWC46_RS02415											RefSeq	+	coaA	CWC46_RS02415				Gene	coaA	panK		CWC46_02415	Protein Homology	CDS	Genbank:WP_021014044.1	CDS	COORDINATES: similar to AA sequence:RefSeq:WP_012004738.1
NZ_CP025085.1	intergenic	525377	525408		intergenic_NZ_CP025085.1-nt00525377											SorTnSeq	+	intergenic_NZ_CP025085.1-nt00525377
NZ_CP025085.1	gene	525409	526368	bifunctional biotin--[acetyl-CoA-carboxylase] synthetase/biotin operon repressor	gene-CWC46_RS02420											RefSeq	-	CWC46_RS02420	CWC46_RS02420				Gene				CWC46_02420	Protein Homology	CDS	Genbank:WP_021014043.1	CDS	COORDINATES: similar to AA sequence:RefSeq:WP_011091852.1
NZ_CP025085.1	gene	526365	527402	UDP-N-acetylmuramate dehydrogenase	gene-CWC46_RS02425											RefSeq	-	murB	CWC46_RS02425				Gene	murB			CWC46_02425	Protein Homology	CDS	Genbank:WP_037381075.1	CDS	COORDINATES: similar to AA sequence:RefSeq:WP_010287071.1
NZ_CP025085.1	intergenic	527403	527645		intergenic_NZ_CP025085.1-nt00527403											SorTnSeq	+	intergenic_NZ_CP025085.1-nt00527403
NZ_CP025085.1	gene	527646	527761	5S ribosomal RNA	gene-CWC46_RS02430											RefSeq	-	rrf	CWC46_RS02430				Gene	rrf			CWC46_02430	cmsearch	rRNA	RFAM:RF00001	rRNA	COORDINATES: profile:INFERNAL:1.1.1
NZ_CP025085.1	intergenic	527762	527854		intergenic_NZ_CP025085.1-nt00527762											SorTnSeq	+	intergenic_NZ_CP025085.1-nt00527762
NZ_CP025085.1	gene	527855	530972	23S ribosomal RNA	gene-CWC46_RS02435											RefSeq	-	CWC46_RS02435	CWC46_RS02435				Gene				CWC46_02435	RefSeq	rRNA		rRNA
NZ_CP025085.1	intergenic	530973	531302		intergenic_NZ_CP025085.1-nt00530973											SorTnSeq	+	intergenic_NZ_CP025085.1-nt00530973
NZ_CP025085.1	gene	531303	531378	tRNA-Glu	gene-CWC46_RS02440											RefSeq	-	CWC46_RS02440	CWC46_RS02440				Gene				CWC46_02440	tRNAscan-SE	tRNA		tRNA	COORDINATES: profile:tRNAscan-SE:2.0.4
NZ_CP025085.1	intergenic	531379	531452		intergenic_NZ_CP025085.1-nt00531379											SorTnSeq	+	intergenic_NZ_CP025085.1-nt00531379
NZ_CP025085.1	gene	531453	533002	16S ribosomal RNA	gene-CWC46_RS02445											RefSeq	-	CWC46_RS02445	CWC46_RS02445				Gene				CWC46_02445	RefSeq	rRNA		rRNA
NZ_CP025085.1	intergenic	533003	533437		intergenic_NZ_CP025085.1-nt00533003											SorTnSeq	+	intergenic_NZ_CP025085.1-nt00533003
NZ_CP025085.1	gene	533438	534439	ribose operon transcriptional repressor RbsR	gene-CWC46_RS02450	-0.641763	0.62906	1	-0.370511	0.62906	0.998478	6.41628	0.210205	0.760793	1	RefSeq	-	rbsR	CWC46_RS02450				Gene	rbsR			CWC46_02450	Protein Homology	CDS	Genbank:WP_168187283.1	CDS	COORDINATES: similar to AA sequence:RefSeq:WP_013315723.1
NZ_CP025085.1	intergenic	534440	534442		intergenic_NZ_CP025085.1-nt00534440											SorTnSeq	+	intergenic_NZ_CP025085.1-nt00534440
NZ_CP025085.1	gene	534443	535369	ribokinase	gene-CWC46_RS02455	-0.203319	0.765993	1	-0.482023	0.451383	0.907018	7.44477	0.292307	0.338192	1	RefSeq	-	rbsK	CWC46_RS02455				Gene	rbsK			CWC46_02455	Protein Homology	CDS	Genbank:WP_021013782.1	CDS	COORDINATES: similar to AA sequence:RefSeq:WP_010300124.1
NZ_CP025085.1	intergenic	535370	535433		intergenic_NZ_CP025085.1-nt00535370											SorTnSeq	+	intergenic_NZ_CP025085.1-nt00535370
NZ_CP025085.1	gene	535434	536321	ribose ABC transporter substrate-binding protein RbsB	gene-CWC46_RS02460	-0.189201	0.871415	1	-1.45669	0.0501034	0.48224	7.18737	0.10334	0.752036	1	RefSeq	-	rbsB	CWC46_RS02460				Gene	rbsB			CWC46_02460	Protein Homology	CDS	Genbank:WP_021013781.1	CDS	COORDINATES: similar to AA sequence:RefSeq:WP_017375080.1
NZ_CP025085.1	intergenic	536322	536346		intergenic_NZ_CP025085.1-nt00536322											SorTnSeq	+	intergenic_NZ_CP025085.1-nt00536322
NZ_CP025085.1	gene	536347	537315	ribose ABC transporter permease	gene-CWC46_RS02465	-0.638722	0.291218	0.896617	-0.600858	0.381696	0.874004	7.39685	0.00687469	1	1	RefSeq	-	rbsC	CWC46_RS02465				Gene	rbsC			CWC46_02465	Protein Homology	CDS	Genbank:WP_021013780.1	CDS	COORDINATES: similar to AA sequence:RefSeq:WP_005976511.1
NZ_CP025085.1	intergenic	537316	537322		intergenic_NZ_CP025085.1-nt00537316											SorTnSeq	+	intergenic_NZ_CP025085.1-nt00537316
NZ_CP025085.1	gene	537323	538828	ribose ABC transporter ATP-binding protein RbsA	gene-CWC46_RS02470	-0.284877	0.62541	1	0.316022	0.380005	0.873612	8.03917	0.181832	0.482316	1	RefSeq	-	rbsA	CWC46_RS02470				Gene	rbsA			CWC46_02470	Protein Homology	CDS	Genbank:WP_021013779.1	CDS	COORDINATES: similar to AA sequence:RefSeq:WP_010300119.1
NZ_CP025085.1	intergenic	538829	538835		intergenic_NZ_CP025085.1-nt00538829											SorTnSeq	+	intergenic_NZ_CP025085.1-nt00538829
NZ_CP025085.1	gene	538836	539255	D-ribose pyranase	gene-CWC46_RS02475	0.404115	0.511378	1	0.139442	0.86794	1	7.02044	-0.0559714	1	1	RefSeq	-	rbsD	CWC46_RS02475				Gene	rbsD			CWC46_02475	Protein Homology	CDS	Genbank:WP_021013778.1	CDS	COORDINATES: similar to AA sequence:RefSeq:WP_004393068.1
NZ_CP025085.1	intergenic	539256	539534		intergenic_NZ_CP025085.1-nt00539256											SorTnSeq	+	intergenic_NZ_CP025085.1-nt00539256
NZ_CP025085.1	gene	539535	541403	low affinity potassium transporter Kup	gene-CWC46_RS02480	-0.162195	0.804319	1	-0.199929	0.807196	1	7.86688	0.126205	0.681223	1	RefSeq	-	kup	CWC46_RS02480				Gene	kup			CWC46_02480	Protein Homology	CDS	Genbank:WP_021013777.1	CDS	COORDINATES: similar to AA sequence:RefSeq:NP_462779.1
NZ_CP025085.1	intergenic	541404	541660		intergenic_NZ_CP025085.1-nt00541404	-0.555253	0.753907	1	-4.41917	0.0703128	0.535321	6.09432	0.676631	0.229483	1	SorTnSeq	+	intergenic_NZ_CP025085.1-nt00541404
NZ_CP025085.1	gene	541661	543157	ATPase RavA	gene-CWC46_RS02485	-0.214462	0.581119	1	-0.886506	0.0504547	0.48224	8.08823	-0.0713938	0.824102	1	RefSeq	+	ravA	CWC46_RS02485				Gene	ravA			CWC46_02485	Protein Homology	CDS	Genbank:WP_021013776.1	CDS	COORDINATES: similar to AA sequence:RefSeq:WP_015842322.1
NZ_CP025085.1	intergenic	543158	543162		intergenic_NZ_CP025085.1-nt00543158											SorTnSeq	+	intergenic_NZ_CP025085.1-nt00543158
NZ_CP025085.1	gene	543163	544638	ATPase RavA stimulator ViaA	gene-CWC46_RS02490	-0.339876	0.44521	0.982097	0.0565627	0.918779	1	8.20983	-0.0315693	1	1	RefSeq	+	viaA	CWC46_RS02490				Gene	viaA			CWC46_02490	Protein Homology	CDS	Genbank:WP_021013775.1	CDS	COORDINATES: similar to AA sequence:RefSeq:WP_019844291.1
NZ_CP025085.1	intergenic	544639	544799		intergenic_NZ_CP025085.1-nt00544639	-0.567371	0.610156	1	0.0122008	0.816295	1	6.31679	-0.0295894	1	1	SorTnSeq	+	intergenic_NZ_CP025085.1-nt00544639
NZ_CP025085.1	gene	544800	545261	transcriptional regulator AsnC	gene-CWC46_RS02495	-0.356165	0.627104	1	-2.40173	0.00231579	0.121506	7.27477	0.388162	0.163285	1	RefSeq	+	asnC	CWC46_RS02495				Gene	asnC			CWC46_02495	Protein Homology	CDS	Genbank:WP_021013774.1	CDS	COORDINATES: similar to AA sequence:RefSeq:WP_011144463.1
NZ_CP025085.1	intergenic	545262	545351		intergenic_NZ_CP025085.1-nt00545262											SorTnSeq	+	intergenic_NZ_CP025085.1-nt00545262
NZ_CP025085.1	gene	545352	545795	FMN-binding protein MioC	gene-CWC46_RS02500											RefSeq	+	mioC	CWC46_RS02500				Gene	mioC			CWC46_02500	Protein Homology	CDS	Genbank:WP_021013773.1	CDS	COORDINATES: similar to AA sequence:RefSeq:WP_014702123.1
NZ_CP025085.1	intergenic	545796	546171		intergenic_NZ_CP025085.1-nt00545796											SorTnSeq	+	intergenic_NZ_CP025085.1-nt00545796
NZ_CP025085.1	gene	546172	548061	tRNA uridine-5-carboxymethylaminomethyl(34) synthesis enzyme MnmG	gene-CWC46_RS02505											RefSeq	+	mnmG	CWC46_RS02505				Gene	mnmG			CWC46_02505	Protein Homology	CDS	Genbank:WP_021013772.1	CDS	COORDINATES: similar to AA sequence:RefSeq:WP_000499793.1
NZ_CP025085.1	intergenic	548062	548147		intergenic_NZ_CP025085.1-nt00548062											SorTnSeq	+	intergenic_NZ_CP025085.1-nt00548062
NZ_CP025085.1	gene	548148	548768	16S rRNA (guanine(527)-N(7))-methyltransferase RsmG	gene-CWC46_RS02510	0.605595	0.281043	0.895025	-0.245142	0.84502	1	6.85994	0.283897	0.525777	1	RefSeq	+	rsmG	CWC46_RS02510				Gene	rsmG			CWC46_02510	Protein Homology	CDS	Genbank:WP_021013771.1	CDS	COORDINATES: similar to AA sequence:RefSeq:WP_016941656.1
NZ_CP025085.1	intergenic	548769	549391		intergenic_NZ_CP025085.1-nt00548769	-0.477323	0.693953	1	-0.913198	0.313648	0.805633	6.71102	-0.0302921	1	1	SorTnSeq	+	intergenic_NZ_CP025085.1-nt00548769
NZ_CP025085.1	gene	549392	549775	F0F1 ATP synthase subunit I	gene-CWC46_RS02515											RefSeq	+	atpI	CWC46_RS02515				Gene	atpI			CWC46_02515	Protein Homology	CDS	Genbank:WP_021013770.1	CDS	COORDINATES: similar to AA sequence:RefSeq:WP_004956904.1
NZ_CP025085.1	intergenic	549776	549797		intergenic_NZ_CP025085.1-nt00549776											SorTnSeq	+	intergenic_NZ_CP025085.1-nt00549776
NZ_CP025085.1	gene	549798	550580	F0F1 ATP synthase subunit A	gene-CWC46_RS02520											RefSeq	+	atpB	CWC46_RS02520				Gene	atpB			CWC46_02520	Protein Homology	CDS	Genbank:WP_021013769.1	CDS	COORDINATES: similar to AA sequence:RefSeq:WP_015376132.1
NZ_CP025085.1	intergenic	550581	550630		intergenic_NZ_CP025085.1-nt00550581											SorTnSeq	+	intergenic_NZ_CP025085.1-nt00550581
NZ_CP025085.1	gene	550631	550870	F0F1 ATP synthase subunit C	gene-CWC46_RS02525											RefSeq	+	atpE	CWC46_RS02525				Gene	atpE			CWC46_02525	Protein Homology	CDS	Genbank:WP_005976545.1	CDS	COORDINATES: similar to AA sequence:RefSeq:WP_004246596.1
NZ_CP025085.1	intergenic	550871	550931		intergenic_NZ_CP025085.1-nt00550871											SorTnSeq	+	intergenic_NZ_CP025085.1-nt00550871
NZ_CP025085.1	gene	550932	551402	F0F1 ATP synthase subunit B	gene-CWC46_RS02530											RefSeq	+	atpF	CWC46_RS02530				Gene	atpF			CWC46_02530	Protein Homology	CDS	Genbank:WP_021013768.1	CDS	COORDINATES: similar to AA sequence:RefSeq:WP_001052215.1
NZ_CP025085.1	intergenic	551403	551416		intergenic_NZ_CP025085.1-nt00551403											SorTnSeq	+	intergenic_NZ_CP025085.1-nt00551403
NZ_CP025085.1	gene	551417	551950	F0F1 ATP synthase subunit delta	gene-CWC46_RS02535											RefSeq	+	atpH	CWC46_RS02535				Gene	atpH			CWC46_02535	Protein Homology	CDS	Genbank:WP_021013767.1	CDS	COORDINATES: similar to AA sequence:RefSeq:NP_312704.1
NZ_CP025085.1	intergenic	551951	551962		intergenic_NZ_CP025085.1-nt00551951											SorTnSeq	+	intergenic_NZ_CP025085.1-nt00551951
NZ_CP025085.1	gene	551963	553504	F0F1 ATP synthase subunit alpha	gene-CWC46_RS02540											RefSeq	+	atpA	CWC46_RS02540				Gene	atpA			CWC46_02540	Protein Homology	CDS	Genbank:WP_021013766.1	CDS	COORDINATES: similar to AA sequence:RefSeq:WP_001176751.1
NZ_CP025085.1	intergenic	553505	553556		intergenic_NZ_CP025085.1-nt00553505											SorTnSeq	+	intergenic_NZ_CP025085.1-nt00553505
NZ_CP025085.1	gene	553557	554420	F0F1 ATP synthase subunit gamma	gene-CWC46_RS02545											RefSeq	+	atpG	CWC46_RS02545				Gene	atpG			CWC46_02545	Protein Homology	CDS	Genbank:WP_021013765.1	CDS	COORDINATES: similar to AA sequence:RefSeq:WP_019077994.1
NZ_CP025085.1	intergenic	554421	554452		intergenic_NZ_CP025085.1-nt00554421											SorTnSeq	+	intergenic_NZ_CP025085.1-nt00554421
NZ_CP025085.1	gene	554453	555835	F0F1 ATP synthase subunit beta	gene-CWC46_RS02550											RefSeq	+	atpD	CWC46_RS02550				Gene	atpD			CWC46_02550	Protein Homology	CDS	Genbank:WP_021013764.1	CDS	COORDINATES: similar to AA sequence:RefSeq:NP_312701.1
NZ_CP025085.1	intergenic	555836	555864		intergenic_NZ_CP025085.1-nt00555836											SorTnSeq	+	intergenic_NZ_CP025085.1-nt00555836
NZ_CP025085.1	gene	555865	556278	F0F1 ATP synthase subunit epsilon	gene-CWC46_RS02555											RefSeq	+	atpC	CWC46_RS02555				Gene	atpC			CWC46_02555	Protein Homology	CDS	Genbank:WP_162300159.1	CDS	COORDINATES: similar to AA sequence:RefSeq:YP_005229606.1
NZ_CP025085.1	intergenic	556279	556395		intergenic_NZ_CP025085.1-nt00556279											SorTnSeq	+	intergenic_NZ_CP025085.1-nt00556279
NZ_CP025085.1	gene	556396	558609	right-handed parallel beta-helix repeat-containing protein	gene-CWC46_RS02560	-0.376462	0.422196	0.975577	-0.419843	0.308173	0.800138	8.13567	0.183588	0.42249	1	RefSeq	-	CWC46_RS02560	CWC46_RS02560				Gene				CWC46_02560	Protein Homology	CDS	Genbank:WP_021013762.1	CDS	COORDINATES: similar to AA sequence:RefSeq:WP_016941650.1
NZ_CP025085.1	intergenic	558610	558968		intergenic_NZ_CP025085.1-nt00558610											SorTnSeq	+	intergenic_NZ_CP025085.1-nt00558610
NZ_CP025085.1	gene	558969	560339	bifunctional UDP-N-acetylglucosamine diphosphorylase/glucosamine-1-phosphate N-acetyltransferase GlmU	gene-CWC46_RS02565											RefSeq	+	glmU	CWC46_RS02565				Gene	glmU			CWC46_02565	Protein Homology	CDS	Genbank:WP_021013761.1	CDS	COORDINATES: similar to AA sequence:RefSeq:WP_015842334.1
NZ_CP025085.1	intergenic	560340	560670		intergenic_NZ_CP025085.1-nt00560340	-0.114366	1	1	0.157767	1	1	6.09438	0.112198	1	1	SorTnSeq	+	intergenic_NZ_CP025085.1-nt00560340
NZ_CP025085.1	gene	560671	562506	glutamine--fructose-6-phosphate transaminase (isomerizing)	gene-CWC46_RS02570											RefSeq	+	glmS	CWC46_RS02570				Gene	glmS			CWC46_02570	Protein Homology	CDS	Genbank:WP_021013760.1	CDS	COORDINATES: similar to AA sequence:RefSeq:WP_017490428.1
NZ_CP025085.1	intergenic	562507	562771		intergenic_NZ_CP025085.1-nt00562507	0.824138	0.423951	0.975577	-1.45421	0.289063	0.782459	5.96887	0.160957	1	1	SorTnSeq	+	intergenic_NZ_CP025085.1-nt00562507
NZ_CP025085.1	gene	562772	562978	hypothetical protein	gene-CWC46_RS02575	-0.728354	1	1	-0.843395	0.6875	1	5.67932	0.571988	0.480683	1	RefSeq	-	CWC46_RS02575	CWC46_RS02575				Gene				CWC46_02575	GeneMarkS-2+	CDS	Genbank:WP_021013759.1	CDS	COORDINATES: ab initio prediction:GeneMarkS-2+
NZ_CP025085.1	intergenic	562979	563168		intergenic_NZ_CP025085.1-nt00562979	-1.67029	0.343751	0.928106	-0.341815	0.774414	1	6.0701	0.0956762	1	1	SorTnSeq	+	intergenic_NZ_CP025085.1-nt00562979
NZ_CP025085.1	pseudogene	563169	563546	helix-turn-helix transcriptional regulator	gene-CWC46_RS02580	-0.043349	1	1	0.236322	0.75523	1	7.13005	-0.0336876	1	1	RefSeq	-	CWC46_RS02580	CWC46_RS02580			partialpseudo	Gene				CWC46_02580	Protein Homology	CDS		CDS	COORDINATES: similar to AA sequence:RefSeq:WP_017491820.1	incomplete%3B partial in the middle of a contig%3B missing N-terminus
NZ_CP025085.1	pseudogene	563537	563698	short-chain dehydrogenase/reductase	gene-CWC46_RS02585	-0.426432	0.690039	1	-0.0814302	1	1	6.63045	-0.346922	0.401065	1	RefSeq	+	CWC46_RS02585	CWC46_RS02585			partialpseudo	Gene				CWC46_02585	Protein Homology	CDS		CDS	COORDINATES: similar to AA sequence:RefSeq:WP_020456296.1	incomplete%3B partial in the middle of a contig%3B missing N-terminus
NZ_CP025085.1	intergenic	563699	564083		intergenic_NZ_CP025085.1-nt00563699	0.301791	0.720101	1	0.172917	0.860051	1	6.98193	0.278769	0.470373	1	SorTnSeq	+	intergenic_NZ_CP025085.1-nt00563699
NZ_CP025085.1	gene	564084	564470	hypothetical protein	gene-CWC46_RS02590	-0.160321	0.787708	1	-0.812666	0.160782	0.668202	7.58826	-0.0176167	1	1	RefSeq	+	CWC46_RS02590	CWC46_RS02590				Gene				CWC46_02590	Protein Homology	CDS	Genbank:WP_021013758.1	CDS	COORDINATES: similar to AA sequence:RefSeq:WP_010681459.1
NZ_CP025085.1	intergenic	564471	564538		intergenic_NZ_CP025085.1-nt00564471											SorTnSeq	+	intergenic_NZ_CP025085.1-nt00564471
NZ_CP025085.1	gene	564539	565606	O-methyltransferase family 2	gene-CWC46_RS02595	-0.0833686	0.860313	1	0.0401273	0.932204	1	8.79474	0.167744	0.383337	1	RefSeq	+	CWC46_RS02595	CWC46_RS02595				Gene				CWC46_02595	Protein Homology	CDS	Genbank:WP_021013757.1	CDS	COORDINATES: similar to AA sequence:RefSeq:WP_014702145.1
NZ_CP025085.1	intergenic	565607	565678		intergenic_NZ_CP025085.1-nt00565607											SorTnSeq	+	intergenic_NZ_CP025085.1-nt00565607
NZ_CP025085.1	gene	565679	566410	beta-ketoacyl synthase chain length factor	gene-CWC46_RS02600	-0.373189	0.83882	1	-0.245142	0.84502	1	6.71102	0.0707143	0.893854	1	RefSeq	+	CWC46_RS02600	CWC46_RS02600				Gene				CWC46_02600	Protein Homology	CDS	Genbank:WP_021013756.1	CDS	COORDINATES: similar to AA sequence:RefSeq:WP_014702146.1
NZ_CP025085.1	gene	566403	567197	1-acyl-sn-glycerol-3-phosphate acyltransferase	gene-CWC46_RS02605	-0.170435	1	1	-1.80961	0.0783547	0.553711	6.57977	-0.288972	0.488459	1	RefSeq	+	CWC46_RS02605	CWC46_RS02605				Gene				CWC46_02605	Protein Homology	CDS	Genbank:WP_021013755.1	CDS	COORDINATES: similar to AA sequence:RefSeq:WP_007887283.1
NZ_CP025085.1	intergenic	567198	567222		intergenic_NZ_CP025085.1-nt00567198											SorTnSeq	+	intergenic_NZ_CP025085.1-nt00567198
NZ_CP025085.1	gene	567223	567489	acyl carrier protein	gene-CWC46_RS02610											RefSeq	+	CWC46_RS02610	CWC46_RS02610				Gene				CWC46_02610	Protein Homology	CDS	Genbank:WP_021013754.1	CDS	COORDINATES: similar to AA sequence:RefSeq:WP_012886761.1
NZ_CP025085.1	intergenic	567490	567507		intergenic_NZ_CP025085.1-nt00567490											SorTnSeq	+	intergenic_NZ_CP025085.1-nt00567490
NZ_CP025085.1	gene	567508	567759	acyl carrier protein	gene-CWC46_RS02615	-0.305885	1	1	0.827685	0.423951	0.895847	6.04549	0.567044	0.44207	1	RefSeq	+	CWC46_RS02615	CWC46_RS02615				Gene				CWC46_02615	Protein Homology	CDS	Genbank:WP_071790838.1	CDS	COORDINATES: similar to AA sequence:RefSeq:WP_011095958.1
NZ_CP025085.1	intergenic	567760	567771		intergenic_NZ_CP025085.1-nt00567760											SorTnSeq	+	intergenic_NZ_CP025085.1-nt00567760
NZ_CP025085.1	gene	567772	568332	DNA gyrase subunit B	gene-CWC46_RS02620	-0.789216	0.404874	0.965527	-0.605262	0.557198	0.957887	6.84563	0.328778	0.396129	1	RefSeq	+	CWC46_RS02620	CWC46_RS02620				Gene				CWC46_02620	Protein Homology	CDS	Genbank:WP_037380450.1	CDS	COORDINATES: similar to AA sequence:RefSeq:WP_011095957.1
NZ_CP025085.1	gene	568332	569684	acyl-CoA synthetase	gene-CWC46_RS02625	-0.269664	0.671813	1	-1.51175	0.0195211	0.342606	7.44474	-0.00312014	1	1	RefSeq	+	CWC46_RS02625	CWC46_RS02625				Gene				CWC46_02625	Protein Homology	CDS	Genbank:WP_021013751.1	CDS	COORDINATES: similar to AA sequence:RefSeq:WP_019844279.1
NZ_CP025085.1	gene	569671	570021	beta-hydroxyacyl-ACP dehydratase	gene-CWC46_RS02630	-0.0887639	1	1	-1.16017	0.266847	0.767807	6.23187	-0.0212036	1	1	RefSeq	+	CWC46_RS02630	CWC46_RS02630				Gene				CWC46_02630	Protein Homology	CDS	Genbank:WP_021013750.1	CDS	COORDINATES: similar to AA sequence:RefSeq:WP_009115067.1
NZ_CP025085.1	gene	570012	571721	glycosyltransferase family 2 protein	gene-CWC46_RS02635	-0.300955	0.602926	1	-0.325014	0.525777	0.948545	7.88082	0.33979	0.170525	1	RefSeq	+	CWC46_RS02635	CWC46_RS02635				Gene				CWC46_02635	Protein Homology	CDS	Genbank:WP_021013749.1	CDS	COORDINATES: similar to AA sequence:RefSeq:WP_011095954.1
NZ_CP025085.1	intergenic	571722	571729		intergenic_NZ_CP025085.1-nt00571722											SorTnSeq	+	intergenic_NZ_CP025085.1-nt00571722
NZ_CP025085.1	gene	571730	572155	acyl-CoA thioesterase	gene-CWC46_RS02640	-0.0727899	1	1	0.272376	0.83882	1	6.56254	0.124025	0.882997	1	RefSeq	+	CWC46_RS02640	CWC46_RS02640				Gene				CWC46_02640	Protein Homology	CDS	Genbank:WP_021013748.1	CDS	COORDINATES: similar to AA sequence:RefSeq:WP_005976585.1
NZ_CP025085.1	gene	572152	572757	outer membrane lipoprotein carrier protein LolA	gene-CWC46_RS02645	-0.114635	1	1	0.15638	1	1	6.18748	0.427914	0.494452	1	RefSeq	+	CWC46_RS02645	CWC46_RS02645				Gene				CWC46_02645	Protein Homology	CDS	Genbank:WP_021013747.1	CDS	COORDINATES: similar to AA sequence:RefSeq:WP_009115070.1
NZ_CP025085.1	gene	572729	575050	MMPL family transporter	gene-CWC46_RS02650	-0.690081	0.124922	0.716354	-0.819849	0.0805098	0.563725	8.06379	0.0834445	0.767568	1	RefSeq	+	CWC46_RS02650	CWC46_RS02650				Gene				CWC46_02650	Protein Homology	CDS	Genbank:WP_021013746.1	CDS	COORDINATES: similar to AA sequence:RefSeq:WP_011095951.1
NZ_CP025085.1	gene	575047	575622	DUF3261 domain-containing protein	gene-CWC46_RS02655	-0.872502	0.20049	0.830484	-0.744633	0.296208	0.787934	6.88789	-0.387338	0.335562	1	RefSeq	+	CWC46_RS02655	CWC46_RS02655				Gene				CWC46_02655	Protein Homology	CDS	Genbank:WP_021013745.1	CDS	COORDINATES: similar to AA sequence:RefSeq:WP_002436593.1
NZ_CP025085.1	intergenic	575623	575623		intergenic_NZ_CP025085.1-nt00575623											SorTnSeq	+	intergenic_NZ_CP025085.1-nt00575623
NZ_CP025085.1	gene	575624	576781	beta-ketoacyl-[acyl-carrier-protein] synthase family protein	gene-CWC46_RS02660	-0.972582	0.0869513	0.694008	-0.693115	0.168646	0.676331	7.81663	0.0255694	1	1	RefSeq	+	CWC46_RS02660	CWC46_RS02660				Gene				CWC46_02660	Protein Homology	CDS	Genbank:WP_021013744.1	CDS	COORDINATES: similar to AA sequence:RefSeq:WP_008925908.1
NZ_CP025085.1	gene	576774	577250	hotdog family protein	gene-CWC46_RS02665	0.100151	1	1	0.327152	0.584666	0.971935	6.81688	0.159801	0.794845	1	RefSeq	+	CWC46_RS02665	CWC46_RS02665				Gene				CWC46_02665	Protein Homology	CDS	Genbank:WP_021013743.1	CDS	COORDINATES: similar to AA sequence:RefSeq:WP_010681444.1
NZ_CP025085.1	gene	577247	577978	3-oxoacyl-ACP reductase FabG	gene-CWC46_RS02670	-1.02166	0.168639	0.793123	-0.0100139	1	1	6.91537	-0.0559715	1	1	RefSeq	+	fabG	CWC46_RS02670				Gene	fabG			CWC46_02670	Protein Homology	CDS	Genbank:WP_021013742.1	CDS	COORDINATES: similar to AA sequence:RefSeq:WP_009115075.1
NZ_CP025085.1	gene	577978	579204	beta-ketoacyl-ACP synthase	gene-CWC46_RS02675	-0.396046	0.259881	0.875598	-0.894803	0.0761199	0.553711	7.71094	-0.167222	0.523537	1	RefSeq	+	CWC46_RS02675	CWC46_RS02675				Gene				CWC46_02675	Protein Homology	CDS	Genbank:WP_037380979.1	CDS	COORDINATES: similar to AA sequence:RefSeq:WP_005976599.1
NZ_CP025085.1	intergenic	579205	579571		intergenic_NZ_CP025085.1-nt00579205	-1.63328	0.0635688	0.644721	-1.20779	0.189248	0.692764	6.64682	0.159802	0.794845	1	SorTnSeq	+	intergenic_NZ_CP025085.1-nt00579205
NZ_CP025085.1	gene	579572	580609	phosphate ABC transporter substrate-binding protein PstS	gene-CWC46_RS02680											RefSeq	+	pstS	CWC46_RS02680				Gene	pstS			CWC46_02680	Protein Homology	CDS	Genbank:WP_021013740.1	CDS	COORDINATES: similar to AA sequence:RefSeq:WP_000867129.1
NZ_CP025085.1	intergenic	580610	580722		intergenic_NZ_CP025085.1-nt00580610											SorTnSeq	+	intergenic_NZ_CP025085.1-nt00580610
NZ_CP025085.1	gene	580723	581682	phosphate ABC transporter permease PstC	gene-CWC46_RS02685											RefSeq	+	pstC	CWC46_RS02685				Gene	pstC			CWC46_02685	Protein Homology	CDS	Genbank:WP_021013739.1	CDS	COORDINATES: similar to AA sequence:RefSeq:NP_462755.1
NZ_CP025085.1	gene	581682	582569	phosphate ABC transporter permease PstA	gene-CWC46_RS02690											RefSeq	+	pstA	CWC46_RS02690				Gene	pstA			CWC46_02690	Protein Homology	CDS	Genbank:WP_021013738.1	CDS	COORDINATES: similar to AA sequence:RefSeq:WP_010681438.1
NZ_CP025085.1	intergenic	582570	582617		intergenic_NZ_CP025085.1-nt00582570											SorTnSeq	+	intergenic_NZ_CP025085.1-nt00582570
NZ_CP025085.1	gene	582618	583394	phosphate ABC transporter ATP-binding protein PstB	gene-CWC46_RS02695											RefSeq	+	pstB	CWC46_RS02695				Gene	pstB			CWC46_02695	Protein Homology	CDS	Genbank:WP_021013737.1	CDS	COORDINATES: similar to AA sequence:RefSeq:WP_004718216.1
NZ_CP025085.1	intergenic	583395	583407		intergenic_NZ_CP025085.1-nt00583395											SorTnSeq	+	intergenic_NZ_CP025085.1-nt00583395
NZ_CP025085.1	gene	583408	584139	phosphate signaling complex protein PhoU	gene-CWC46_RS02700											RefSeq	+	phoU	CWC46_RS02700				Gene	phoU			CWC46_02700	Protein Homology	CDS	Genbank:WP_021013736.1	CDS	COORDINATES: similar to AA sequence:RefSeq:WP_016941643.1
NZ_CP025085.1	intergenic	584140	584671		intergenic_NZ_CP025085.1-nt00584140	-0.0903508	1	1	-0.219087	0.728334	1	6.96884	-0.098593	0.904975	1	SorTnSeq	+	intergenic_NZ_CP025085.1-nt00584140
NZ_CP025085.1	gene	584672	585295	TetR/AcrR family transcriptional regulator	gene-CWC46_RS02705	-0.305885	1	1	0.120522	1	1	5.91541	0.294001	0.83882	1	RefSeq	-	CWC46_RS02705	CWC46_RS02705				Gene				CWC46_02705	Protein Homology	CDS	Genbank:WP_021013735.1	CDS	COORDINATES: similar to AA sequence:RefSeq:WP_009113613.1
NZ_CP025085.1	intergenic	585296	585967		intergenic_NZ_CP025085.1-nt00585296	-1.6924	0.0241201	0.46728	0.125542	0.877615	1	7.22082	0.194802	0.602417	1	SorTnSeq	+	intergenic_NZ_CP025085.1-nt00585296
NZ_CP025085.1	gene	585968	586609	TetR/AcrR family transcriptional regulator	gene-CWC46_RS02710	-0.793646	0.264933	0.875598	0.725439	0.174174	0.683602	7.20987	0.329509	0.32614	1	RefSeq	+	CWC46_RS02710	CWC46_RS02710				Gene				CWC46_02710	Protein Homology	CDS	Genbank:WP_021013733.1	CDS	COORDINATES: similar to AA sequence:RefSeq:WP_016242428.1
NZ_CP025085.1	intergenic	586610	587206		intergenic_NZ_CP025085.1-nt00586610	-0.665439	0.548829	1	-0.239369	1	1	6.02037	0.0237052	1	1	SorTnSeq	+	intergenic_NZ_CP025085.1-nt00586610
NZ_CP025085.1	gene	587207	588340	efflux RND transporter periplasmic adaptor subunit	gene-CWC46_RS02715	0.13962	0.885434	1	-0.227789	0.770868	1	7.36743	-0.092131	0.839216	1	RefSeq	+	CWC46_RS02715	CWC46_RS02715				Gene				CWC46_02715	Protein Homology	CDS	Genbank:WP_021013732.1	CDS	COORDINATES: similar to AA sequence:RefSeq:WP_017345912.1
NZ_CP025085.1	intergenic	588341	588350		intergenic_NZ_CP025085.1-nt00588341											SorTnSeq	+	intergenic_NZ_CP025085.1-nt00588341
NZ_CP025085.1	gene	588351	591488	efflux RND transporter permease subunit	gene-CWC46_RS02720	-0.472332	0.199165	0.830484	-0.487996	0.148823	0.641511	8.74179	0.163081	0.326373	1	RefSeq	+	CWC46_RS02720	CWC46_RS02720				Gene				CWC46_02720	Protein Homology	CDS	Genbank:WP_021013731.1	CDS	COORDINATES: similar to AA sequence:RefSeq:WP_007890891.1
NZ_CP025085.1	gene	591481	592905	efflux transporter outer membrane subunit	gene-CWC46_RS02725	0.0358054	1	1	-0.354734	0.389057	0.875508	8.01391	0.330979	0.165989	1	RefSeq	+	CWC46_RS02725	CWC46_RS02725				Gene				CWC46_02725	Protein Homology	CDS	Genbank:WP_021013730.1	CDS	COORDINATES: similar to AA sequence:RefSeq:WP_013510295.1
NZ_CP025085.1	intergenic	592906	593353		intergenic_NZ_CP025085.1-nt00592906	0.476766	0.0314913	0.5315	0.530706	0.00966584	0.244657	9.43134	-0.127694	0.382642	1	SorTnSeq	+	intergenic_NZ_CP025085.1-nt00592906
NZ_CP025085.1	gene	593354	594889	ABC transporter substrate-binding protein	gene-CWC46_RS02730	0.431795	0.00547075	0.248254	0.48368	0.00133466	0.0913767	10.3633	0.0292015	0.80941	1	RefSeq	+	CWC46_RS02730	CWC46_RS02730				Gene				CWC46_02730	Protein Homology	CDS	Genbank:WP_021013729.1	CDS	COORDINATES: similar to AA sequence:RefSeq:WP_015847953.1
NZ_CP025085.1	intergenic	594890	594949		intergenic_NZ_CP025085.1-nt00594890											SorTnSeq	+	intergenic_NZ_CP025085.1-nt00594890
NZ_CP025085.1	gene	594950	595867	ABC transporter permease	gene-CWC46_RS02735	-1.1821	0.0988734	0.702433	-0.19715	0.765993	1	7.28543	-0.0329916	1	1	RefSeq	+	CWC46_RS02735	CWC46_RS02735				Gene				CWC46_02735	Protein Homology	CDS	Genbank:WP_021013728.1	CDS	COORDINATES: similar to AA sequence:RefSeq:WP_013235128.1
NZ_CP025085.1	intergenic	595868	595876		intergenic_NZ_CP025085.1-nt00595868											SorTnSeq	+	intergenic_NZ_CP025085.1-nt00595868
NZ_CP025085.1	gene	595877	596797	ABC transporter permease	gene-CWC46_RS02740	-1.06398	0.184935	0.805114	-0.88012	0.264933	0.767807	7.02025	0.282368	0.434047	1	RefSeq	+	CWC46_RS02740	CWC46_RS02740				Gene				CWC46_02740	Protein Homology	CDS	Genbank:WP_021013727.1	CDS	COORDINATES: similar to AA sequence:RefSeq:WP_012883195.1
NZ_CP025085.1	intergenic	596798	596807		intergenic_NZ_CP025085.1-nt00596798											SorTnSeq	+	intergenic_NZ_CP025085.1-nt00596798
NZ_CP025085.1	gene	596808	597797	ABC transporter ATP-binding protein	gene-CWC46_RS02745	-0.346453	0.504407	1	-0.476048	0.349685	0.842759	7.60526	-0.15769	0.650965	1	RefSeq	+	CWC46_RS02745	CWC46_RS02745				Gene				CWC46_02745	Protein Homology	CDS	Genbank:WP_021013726.1	CDS	COORDINATES: similar to AA sequence:RefSeq:WP_009115087.1
NZ_CP025085.1	intergenic	597798	597823		intergenic_NZ_CP025085.1-nt00597798											SorTnSeq	+	intergenic_NZ_CP025085.1-nt00597798
NZ_CP025085.1	gene	597824	598684	ABC transporter ATP-binding protein	gene-CWC46_RS02750	-0.833612	0.361597	0.934991	-1.66838	0.0356988	0.427115	6.84561	-0.30433	0.470373	1	RefSeq	+	CWC46_RS02750	CWC46_RS02750				Gene				CWC46_02750	Protein Homology	CDS	Genbank:WP_037380975.1	CDS	COORDINATES: similar to AA sequence:RefSeq:WP_006464248.1
NZ_CP025085.1	intergenic	598685	598816		intergenic_NZ_CP025085.1-nt00598685											SorTnSeq	+	intergenic_NZ_CP025085.1-nt00598685
NZ_CP025085.1	gene	598817	600247	M20 family metallopeptidase	gene-CWC46_RS02755	-0.125462	0.81259	1	-0.63834	0.142075	0.636147	7.93558	0.0511415	0.937021	1	RefSeq	+	CWC46_RS02755	CWC46_RS02755				Gene				CWC46_02755	Protein Homology	CDS	Genbank:WP_021013724.1	CDS	COORDINATES: similar to AA sequence:RefSeq:WP_009115089.1
NZ_CP025085.1	intergenic	600248	600337		intergenic_NZ_CP025085.1-nt00600248											SorTnSeq	+	intergenic_NZ_CP025085.1-nt00600248
NZ_CP025085.1	gene	600338	601267	LysR family transcriptional regulator	gene-CWC46_RS02760	0.0740838	1	1	-0.85072	0.135159	0.624108	7.51834	0.0438792	0.925436	1	RefSeq	+	CWC46_RS02760	CWC46_RS02760				Gene				CWC46_02760	Protein Homology	CDS	Genbank:WP_021013723.1	CDS	COORDINATES: similar to AA sequence:RefSeq:WP_013202048.1
NZ_CP025085.1	intergenic	601268	601443		intergenic_NZ_CP025085.1-nt00601268	-1.9399	0.145997	0.738339	-2.05615	0.0922857	0.591613	6.18741	0.120359	1	1	SorTnSeq	+	intergenic_NZ_CP025085.1-nt00601268
NZ_CP025085.1	gene	601444	602460	1-aminocyclopropane-1-carboxylate deaminase	gene-CWC46_RS02765	0.464036	0.0188851	0.441855	0.284267	0.159355	0.666116	9.77106	0.0528408	0.673487	1	RefSeq	-	CWC46_RS02765	CWC46_RS02765				Gene				CWC46_02765	Protein Homology	CDS	Genbank:WP_021013722.1	CDS	COORDINATES: similar to AA sequence:RefSeq:WP_010466243.1
NZ_CP025085.1	intergenic	602461	602728		intergenic_NZ_CP025085.1-nt00602461	-0.242493	0.775451	1	0.162102	0.791368	1	7.53625	0.024179	1	1	SorTnSeq	+	intergenic_NZ_CP025085.1-nt00602461
NZ_CP025085.1	gene	602729	603238	Lrp/AsnC family transcriptional regulator	gene-CWC46_RS02770	-0.109638	0.837558	1	-0.0642504	1	1	8.39198	0.130604	0.544106	1	RefSeq	-	CWC46_RS02770	CWC46_RS02770				Gene				CWC46_02770	Protein Homology	CDS	Genbank:WP_021013721.1	CDS	COORDINATES: similar to AA sequence:RefSeq:WP_009115094.1
NZ_CP025085.1	intergenic	603239	603298		intergenic_NZ_CP025085.1-nt00603239	0.972097	0.151591	0.7508	0.0157664	1	1	6.49132	0.168427	0.87463	1	SorTnSeq	+	intergenic_NZ_CP025085.1-nt00603239
NZ_CP025085.1	gene	603299	603967	6-phosphogluconate phosphatase	gene-CWC46_RS02775	-0.0438816	0.934081	1	-0.0231564	1	1	8.90517	0.0429652	0.822841	1	RefSeq	-	yieH	CWC46_RS02775				Gene	yieH			CWC46_02775	Protein Homology	CDS	Genbank:WP_021013720.1	CDS	COORDINATES: similar to AA sequence:RefSeq:WP_014702171.1
NZ_CP025085.1	intergenic	603968	604189		intergenic_NZ_CP025085.1-nt00603968	0.436084	0.410106	0.974389	0.0100016	1	1	7.56253	0.305638	0.2986	1	SorTnSeq	+	intergenic_NZ_CP025085.1-nt00603968
NZ_CP025085.1	gene	604190	605527	NCS2 family permease	gene-CWC46_RS02780	-0.0593802	0.882521	1	-0.255476	0.29805	0.789808	9.19858	0.0324871	0.841715	1	RefSeq	+	CWC46_RS02780	CWC46_RS02780				Gene				CWC46_02780	Protein Homology	CDS	Genbank:WP_021013719.1	CDS	COORDINATES: similar to AA sequence:RefSeq:WP_013320128.1
NZ_CP025085.1	intergenic	605528	605641		intergenic_NZ_CP025085.1-nt00605528											SorTnSeq	+	intergenic_NZ_CP025085.1-nt00605528
NZ_CP025085.1	gene	605642	606367	hypothetical protein	gene-CWC46_RS02785											RefSeq	-	CWC46_RS02785	CWC46_RS02785				Gene				CWC46_02785	Protein Homology	CDS	Genbank:WP_021013718.1	CDS	COORDINATES: similar to AA sequence:RefSeq:WP_012886786.1
NZ_CP025085.1	intergenic	606368	606997		intergenic_NZ_CP025085.1-nt00606368	-0.298149	0.484124	1	-0.495074	0.129297	0.618491	8.36724	-0.0912008	0.686607	1	SorTnSeq	+	intergenic_NZ_CP025085.1-nt00606368
NZ_CP025085.1	gene	606998	609022	formate-dependent uric acid utilization protein AegA	gene-CWC46_RS02795	-0.304392	0.357752	0.934991	-0.713376	0.0395362	0.438943	8.7186	0.00935361	0.959291	1	RefSeq	-	aegA	CWC46_RS02795				Gene	aegA			CWC46_02795	Protein Homology	CDS	Genbank:WP_037380437.1	CDS	COORDINATES: similar to AA sequence:RefSeq:WP_012886788.1
NZ_CP025085.1	intergenic	609023	609741		intergenic_NZ_CP025085.1-nt00609023	-0.279199	0.720101	1	0.67441	0.222055	0.726294	7.23188	0.427051	0.192765	1	SorTnSeq	+	intergenic_NZ_CP025085.1-nt00609023
NZ_CP025085.1	gene	609742	610413	CsgG/HfaB family protein	gene-CWC46_RS02800	-0.496544	0.584666	1	0.232533	0.627104	0.998478	6.99486	-0.0594921	1	1	RefSeq	+	CWC46_RS02800	CWC46_RS02800				Gene				CWC46_02800	Protein Homology	CDS	Genbank:WP_021013716.1	CDS	COORDINATES: similar to AA sequence:RefSeq:WP_014917138.1
NZ_CP025085.1	intergenic	610414	610431		intergenic_NZ_CP025085.1-nt00610414											SorTnSeq	+	intergenic_NZ_CP025085.1-nt00610414
NZ_CP025085.1	gene	610432	610776	DUF4810 domain-containing protein	gene-CWC46_RS02805	0.283214	1	1	0.72328	0.332307	0.824141	6.31679	0.627327	0.310507	1	RefSeq	+	CWC46_RS02805	CWC46_RS02805				Gene				CWC46_02805	Protein Homology	CDS	Genbank:WP_021013715.1	CDS	COORDINATES: similar to AA sequence:RefSeq:WP_015855656.1
NZ_CP025085.1	intergenic	610777	610788		intergenic_NZ_CP025085.1-nt00610777											SorTnSeq	+	intergenic_NZ_CP025085.1-nt00610777
NZ_CP025085.1	gene	610789	611448	DUF799 domain-containing protein	gene-CWC46_RS02810	0.176981	0.731011	1	0.177061	0.656996	1	8.19864	0.464532	0.040321	1	RefSeq	+	CWC46_RS02810	CWC46_RS02810				Gene				CWC46_02810	Protein Homology	CDS	Genbank:WP_021013714.1	CDS	COORDINATES: similar to AA sequence:RefSeq:WP_013320122.1
NZ_CP025085.1	intergenic	611449	612058		intergenic_NZ_CP025085.1-nt00611449	0.152182	0.540821	1	0.252016	0.335263	0.829126	9.11542	0.0807578	0.598747	1	SorTnSeq	+	intergenic_NZ_CP025085.1-nt00611449
NZ_CP025085.1	gene	612059	613213	UDP-4-amino-4-deoxy-L-arabinose aminotransferase	gene-CWC46_RS02815	-0.103533	0.780742	1	-0.340293	0.302885	0.792535	8.54498	-0.0664319	0.799958	1	RefSeq	+	arnB	CWC46_RS02815				Gene	arnB			CWC46_02815	Protein Homology	CDS	Genbank:WP_021013713.1	CDS	COORDINATES: similar to AA sequence:RefSeq:WP_016191880.1
NZ_CP025085.1	gene	613200	614183	undecaprenyl-phosphate 4-deoxy-4-formamido-L-arabinose transferase	gene-CWC46_RS02820	-0.800387	0.143868	0.738339	-0.477685	0.488459	0.931335	7.53609	0.0104696	1	1	RefSeq	+	arnC	CWC46_RS02820				Gene	arnC			CWC46_02820	Protein Homology	CDS	Genbank:WP_021013712.1	CDS	COORDINATES: similar to AA sequence:RefSeq:WP_019079301.1
NZ_CP025085.1	gene	614180	616162	bifunctional UDP-4-amino-4-deoxy-L-arabinose formyltransferase/UDP-glucuronic acid oxidase ArnA	gene-CWC46_RS02825	-0.965367	0.0395415	0.555135	-0.10467	0.918779	1	8.30099	0.205101	0.339714	1	RefSeq	+	arnA	CWC46_RS02825				Gene	arnA			CWC46_02825	Protein Homology	CDS	Genbank:WP_021013711.1	CDS	COORDINATES: similar to AA sequence:RefSeq:WP_015855660.1
NZ_CP025085.1	gene	616159	617061	4-deoxy-4-formamido-L-arabinose-phosphoundecaprenol deformylase	gene-CWC46_RS02830	-0.18338	0.804319	1	-0.631354	0.252858	0.765917	7.86684	0.155929	0.517929	1	RefSeq	+	CWC46_RS02830	CWC46_RS02830				Gene				CWC46_02830	Protein Homology	CDS	Genbank:WP_021013710.1	CDS	COORDINATES: similar to AA sequence:RefSeq:WP_015848510.1
NZ_CP025085.1	gene	617061	618710	lipid IV(A) 4-amino-4-deoxy-L-arabinosyltransferase	gene-CWC46_RS02835	-0.634618	0.135389	0.738339	-0.254854	0.51543	0.946145	8.22621	0.25664	0.233887	1	RefSeq	+	arnT	CWC46_RS02835				Gene	arnT			CWC46_02835	Protein Homology	CDS	Genbank:WP_021013709.1	CDS	COORDINATES: similar to AA sequence:RefSeq:WP_012886793.1
NZ_CP025085.1	gene	618692	619045	4-amino-4-deoxy-L-arabinose-phosphoundecaprenol flippase subunit ArnE	gene-CWC46_RS02840	-0.317906	1	1	-1.70104	0.115319	0.608972	6.64684	0.17176	0.791368	1	RefSeq	+	arnE	CWC46_RS02840				Gene	arnE			CWC46_02840	Protein Homology	CDS	Genbank:WP_021013708.1	CDS	COORDINATES: similar to AA sequence:RefSeq:WP_004156584.1
NZ_CP025085.1	gene	619042	619440	4-amino-4-deoxy-L-arabinose-phospho-UDP flippase	gene-CWC46_RS02845	-0.629817	0.388655	0.948327	-5.44379	0.00106126	0.0786112	6.61366	0.215975	0.702707	1	RefSeq	+	CWC46_RS02845	CWC46_RS02845				Gene				CWC46_02845	Protein Homology	CDS	Genbank:WP_021013707.1	CDS	COORDINATES: similar to AA sequence:RefSeq:WP_015855664.1
NZ_CP025085.1	intergenic	619441	619515		intergenic_NZ_CP025085.1-nt00619441											SorTnSeq	+	intergenic_NZ_CP025085.1-nt00619441
NZ_CP025085.1	gene	619516	620184	ATP-binding cassette domain-containing protein	gene-CWC46_RS02850	-0.426432	0.541257	1	-1.80961	0.0783547	0.553711	6.88777	0.58036	0.0959267	1	RefSeq	-	CWC46_RS02850	CWC46_RS02850				Gene				CWC46_02850	Protein Homology	CDS	Genbank:WP_037380972.1	CDS	COORDINATES: similar to AA sequence:RefSeq:WP_015699659.1
NZ_CP025085.1	gene	620177	621028	ABC transporter ATP-binding protein	gene-CWC46_RS02855	-0.833613	0.20049	0.830484	-0.300185	0.73588	1	7.11812	0.260351	0.585651	1	RefSeq	-	CWC46_RS02855	CWC46_RS02855				Gene				CWC46_02855	Protein Homology	CDS	Genbank:WP_021013704.1	CDS	COORDINATES: similar to AA sequence:RefSeq:WP_016192821.1
NZ_CP025085.1	gene	621015	621857	ABC transporter permease	gene-CWC46_RS02860	0.662954	0.242987	0.858293	0.124964	1	1	7.11824	0.460974	0.206741	1	RefSeq	-	CWC46_RS02860	CWC46_RS02860				Gene				CWC46_02860	Protein Homology	CDS	Genbank:WP_021013703.1	CDS	COORDINATES: similar to AA sequence:RefSeq:WP_012668946.1
NZ_CP025085.1	gene	621854	622906	ABC transporter permease	gene-CWC46_RS02865	0.432046	0.374156	0.948327	-0.929305	0.111405	0.608972	7.68726	0.218716	0.426447	1	RefSeq	-	CWC46_RS02865	CWC46_RS02865				Gene				CWC46_02865	Protein Homology	CDS	Genbank:WP_021013702.1	CDS	COORDINATES: similar to AA sequence:RefSeq:WP_017349941.1
NZ_CP025085.1	gene	622906	624471	ABC transporter substrate-binding protein	gene-CWC46_RS02870	-0.208738	0.791368	1	-0.711637	0.220332	0.726294	7.79466	0.368529	0.137385	1	RefSeq	-	CWC46_RS02870	CWC46_RS02870				Gene				CWC46_02870	Protein Homology	CDS	Genbank:WP_021013701.1	CDS	COORDINATES: similar to AA sequence:RefSeq:WP_017800845.1
NZ_CP025085.1	intergenic	624472	624812		intergenic_NZ_CP025085.1-nt00624472											SorTnSeq	+	intergenic_NZ_CP025085.1-nt00624472
NZ_CP025085.1	gene	624813	625355	sigma-70 family RNA polymerase sigma factor	gene-CWC46_RS02875	0.399652	0.632203	1	-0.985247	0.390784	0.875508	6.20984	0.156264	0.866578	1	RefSeq	+	CWC46_RS02875	CWC46_RS02875				Gene				CWC46_02875	Protein Homology	CDS	Genbank:WP_021013700.1	CDS	COORDINATES: similar to AA sequence:RefSeq:WP_004308549.1
NZ_CP025085.1	intergenic	625356	625440		intergenic_NZ_CP025085.1-nt00625356											SorTnSeq	+	intergenic_NZ_CP025085.1-nt00625356
NZ_CP025085.1	gene	625441	626478	permease	gene-CWC46_RS02880	-0.0480401	1	1	0.139441	1	1	7.16472	0.441873	0.187465	1	RefSeq	+	CWC46_RS02880	CWC46_RS02880				Gene				CWC46_02880	Protein Homology	CDS	Genbank:WP_021013699.1	CDS	COORDINATES: similar to AA sequence:RefSeq:WP_017844872.1
NZ_CP025085.1	intergenic	626479	626487		intergenic_NZ_CP025085.1-nt00626479											SorTnSeq	+	intergenic_NZ_CP025085.1-nt00626479
NZ_CP025085.1	gene	626488	626724	thioredoxin family protein	gene-CWC46_RS02885											RefSeq	+	CWC46_RS02885	CWC46_RS02885				Gene				CWC46_02885	Protein Homology	CDS	Genbank:WP_021013698.1	CDS	COORDINATES: similar to AA sequence:RefSeq:WP_011911471.1
NZ_CP025085.1	intergenic	626725	626864		intergenic_NZ_CP025085.1-nt00626725	-1.03742	0.423951	0.975577	-0.611617	0.80362	1	6.09437	-0.451227	0.473131	1	SorTnSeq	+	intergenic_NZ_CP025085.1-nt00626725
NZ_CP025085.1	gene	626865	627332	hypothetical protein	gene-CWC46_RS02890	-2.01963	0.145997	0.738339	-4.98148	0.0117189	0.275831	6.2318	0.168428	0.75523	1	RefSeq	-	CWC46_RS02890	CWC46_RS02890				Gene				CWC46_02890	Protein Homology	CDS	Genbank:WP_021013697.1	CDS	COORDINATES: similar to AA sequence:RefSeq:WP_002718078.1
NZ_CP025085.1	intergenic	627333	627349		intergenic_NZ_CP025085.1-nt00627333											SorTnSeq	+	intergenic_NZ_CP025085.1-nt00627333
NZ_CP025085.1	gene	627350	627856	sigma-70 family RNA polymerase sigma factor	gene-CWC46_RS02895	-0.0480396	1	1	-0.582308	0.584666	0.971935	7.02032	0.197794	0.644467	1	RefSeq	-	CWC46_RS02895	CWC46_RS02895				Gene				CWC46_02895	Protein Homology	CDS	Genbank:WP_021013696.1	CDS	COORDINATES: similar to AA sequence:RefSeq:WP_007513868.1
NZ_CP025085.1	intergenic	627857	628296		intergenic_NZ_CP025085.1-nt00627857	0.447704	0.405034	0.965527	-1.50135	0.107753	0.608972	6.95565	0.102209	0.81259	1	SorTnSeq	+	intergenic_NZ_CP025085.1-nt00627857
NZ_CP025085.1	gene	628297	628461	hypothetical protein	gene-CWC46_RS22775											RefSeq	-	CWC46_RS22775	CWC46_RS22775				Gene					GeneMarkS-2+	CDS	Genbank:WP_021013695.1	CDS	COORDINATES: ab initio prediction:GeneMarkS-2+
NZ_CP025085.1	gene	628461	628718	helix-turn-helix domain-containing protein	gene-CWC46_RS02900	0.183207	0.831812	1	0.627692	0.326941	0.823402	6.72666	0.46335	0.271683	1	RefSeq	-	CWC46_RS02900	CWC46_RS02900				Gene				CWC46_02900	Protein Homology	CDS	Genbank:WP_021013694.1	CDS	COORDINATES: similar to AA sequence:RefSeq:WP_005329233.1
NZ_CP025085.1	intergenic	628719	629037		intergenic_NZ_CP025085.1-nt00628719	-0.77467	0.183927	0.805114	0.250384	0.608924	0.987809	7.63037	0.144178	0.588694	1	SorTnSeq	+	intergenic_NZ_CP025085.1-nt00628719
NZ_CP025085.1	gene	629038	629376	NIPSNAP family containing protein	gene-CWC46_RS02905	-0.320304	0.860051	1	0.534854	0.279959	0.782459	7.26429	0.465975	0.137373	1	RefSeq	+	CWC46_RS02905	CWC46_RS02905				Gene				CWC46_02905	Protein Homology	CDS	Genbank:WP_021013693.1	CDS	COORDINATES: similar to AA sequence:RefSeq:WP_013134816.1
NZ_CP025085.1	intergenic	629377	629545		intergenic_NZ_CP025085.1-nt00629377											SorTnSeq	+	intergenic_NZ_CP025085.1-nt00629377
NZ_CP025085.1	gene	629546	630910	tRNA uridine-5-carboxymethylaminomethyl(34) synthesis GTPase MnmE	gene-CWC46_RS02910											RefSeq	-	mnmE	CWC46_RS02910				Gene	mnmE			CWC46_02910	Protein Homology	CDS	Genbank:WP_037380969.1	CDS	COORDINATES: similar to AA sequence:RefSeq:WP_015848543.1
NZ_CP025085.1	intergenic	630911	630981		intergenic_NZ_CP025085.1-nt00630911											SorTnSeq	+	intergenic_NZ_CP025085.1-nt00630911
NZ_CP025085.1	gene	630982	632619	membrane protein insertase YidC	gene-CWC46_RS02915											RefSeq	-	yidC	CWC46_RS02915				Gene	yidC			CWC46_02915	Protein Homology	CDS	Genbank:WP_021013691.1	CDS	COORDINATES: similar to AA sequence:RefSeq:WP_015962454.1
NZ_CP025085.1	intergenic	632620	632621		intergenic_NZ_CP025085.1-nt00632620											SorTnSeq	+	intergenic_NZ_CP025085.1-nt00632620
NZ_CP025085.1	gene	632622	632879	membrane protein insertion efficiency factor YidD	gene-CWC46_RS02920											RefSeq	-	yidD	CWC46_RS02920				Gene	yidD			CWC46_02920	Protein Homology	CDS	Genbank:WP_021013690.1	CDS	COORDINATES: similar to AA sequence:RefSeq:WP_010281237.1
NZ_CP025085.1	gene	632843	633202	ribonuclease P protein component	gene-CWC46_RS02925											RefSeq	-	rnpA	CWC46_RS02925				Gene	rnpA			CWC46_02925	Protein Homology	CDS	Genbank:WP_071790837.1	CDS	COORDINATES: similar to AA sequence:RefSeq:WP_013320101.1
NZ_CP025085.1	intergenic	633203	633220		intergenic_NZ_CP025085.1-nt00633203											SorTnSeq	+	intergenic_NZ_CP025085.1-nt00633203
NZ_CP025085.1	gene	633221	633361	50S ribosomal protein L34	gene-CWC46_RS02930											RefSeq	-	rpmH	CWC46_RS02930				Gene	rpmH			CWC46_02930	Protein Homology	CDS	Genbank:WP_004093983.1	CDS	COORDINATES: similar to AA sequence:RefSeq:WP_001686914.1
NZ_CP025085.1	intergenic	633362	634119		intergenic_NZ_CP025085.1-nt00633362	0.642768	0.774414	1	-1.32401	0.453125	0.907018	5.94237	0.390872	0.690039	1	SorTnSeq	+	intergenic_NZ_CP025085.1-nt00633362
NZ_CP025085.1	gene	634120	635523	chromosomal replication initiator protein DnaA	gene-CWC46_RS02935											RefSeq	+	dnaA	CWC46_RS02935				Gene	dnaA			CWC46_02935	Protein Homology	CDS	Genbank:WP_071790864.1	CDS	COORDINATES: similar to AA sequence:RefSeq:WP_002443736.1
NZ_CP025085.1	intergenic	635524	635527		intergenic_NZ_CP025085.1-nt00635524											SorTnSeq	+	intergenic_NZ_CP025085.1-nt00635524
NZ_CP025085.1	gene	635528	636628	DNA polymerase III subunit beta	gene-CWC46_RS02940											RefSeq	+	dnaN	CWC46_RS02940				Gene	dnaN			CWC46_02940	Protein Homology	CDS	Genbank:WP_021013687.1	CDS	COORDINATES: similar to AA sequence:RefSeq:WP_005976672.1
NZ_CP025085.1	intergenic	636629	636760		intergenic_NZ_CP025085.1-nt00636629											SorTnSeq	+	intergenic_NZ_CP025085.1-nt00636629
NZ_CP025085.1	gene	636761	637846	DNA replication/repair protein RecF	gene-CWC46_RS02945	-0.781944	0.332307	0.921205	-1.4558	0.210114	0.718687	6.61363	0.587445	0.228809	1	RefSeq	+	recF	CWC46_RS02945				Gene	recF			CWC46_02945	Protein Homology	CDS	Genbank:WP_021013686.1	CDS	COORDINATES: similar to AA sequence:RefSeq:WP_004875688.1
NZ_CP025085.1	intergenic	637847	637864		intergenic_NZ_CP025085.1-nt00637847											SorTnSeq	+	intergenic_NZ_CP025085.1-nt00637847
NZ_CP025085.1	gene	637865	640276	DNA topoisomerase (ATP-hydrolyzing) subunit B	gene-CWC46_RS02950											RefSeq	+	gyrB	CWC46_RS02950				Gene	gyrB			CWC46_02950	Protein Homology	CDS	Genbank:WP_021013685.1	CDS	COORDINATES: similar to AA sequence:RefSeq:NP_462735.1
NZ_CP025085.1	intergenic	640277	640378		intergenic_NZ_CP025085.1-nt00640277	-0.00421723	1	1	-1.02199	0.6875	1	5.50944	-0.811527	0.581055	1	SorTnSeq	+	intergenic_NZ_CP025085.1-nt00640277
NZ_CP025085.1	gene	640379	641566	MFS transporter	gene-CWC46_RS02955	-1.43025	0.0350828	0.543249	-1.55718	0.0409605	0.438943	7.19854	0.0857146	0.839216	1	RefSeq	-	CWC46_RS02955	CWC46_RS02955				Gene				CWC46_02955	Protein Homology	CDS	Genbank:WP_021013684.1	CDS	COORDINATES: similar to AA sequence:RefSeq:WP_013320096.1
NZ_CP025085.1	intergenic	641567	641775		intergenic_NZ_CP025085.1-nt00641567	-0.162921	1	1	-0.284908	1	1	5.80218	0.224822	1	1	SorTnSeq	+	intergenic_NZ_CP025085.1-nt00641567
NZ_CP025085.1	gene	641776	643776	methyl-accepting chemotaxis protein	gene-CWC46_RS02960	-0.00448535	1	1	0.301988	0.525777	0.948545	7.91531	0.636666	0.00945526	1	RefSeq	-	CWC46_RS02960	CWC46_RS02960				Gene				CWC46_02960	Protein Homology	CDS	Genbank:WP_021013683.1	CDS	COORDINATES: similar to AA sequence:RefSeq:WP_015855571.1
NZ_CP025085.1	intergenic	643777	644006		intergenic_NZ_CP025085.1-nt00643777	-4.70131	0.0390627	0.555135	-1.882	0.226563	0.731718	6.0454	0.0791221	1	1	SorTnSeq	+	intergenic_NZ_CP025085.1-nt00643777
NZ_CP025085.1	gene	644007	644822	sugar-phosphatase	gene-CWC46_RS02965	0.0617182	1	1	-1.18029	0.0895325	0.591613	7.19866	-0.0196731	1	1	RefSeq	+	yidA	CWC46_RS02965				Gene	yidA			CWC46_02965	Protein Homology	CDS	Genbank:WP_021013682.1	CDS	COORDINATES: similar to AA sequence:RefSeq:WP_011095887.1
NZ_CP025085.1	intergenic	644823	644853		intergenic_NZ_CP025085.1-nt00644823											SorTnSeq	+	intergenic_NZ_CP025085.1-nt00644823
NZ_CP025085.1	gene	644854	646038	mannonate dehydratase	gene-CWC46_RS02970	-0.00447848	1	1	-0.257792	0.770868	1	7.52729	0.297053	0.302885	1	RefSeq	-	uxuA	CWC46_RS02970				Gene	uxuA			CWC46_02970	Protein Homology	CDS	Genbank:WP_021013681.1	CDS	COORDINATES: similar to AA sequence:RefSeq:WP_012886681.1
NZ_CP025085.1	intergenic	646039	646401		intergenic_NZ_CP025085.1-nt00646039	0.563062	0.480683	0.99597	-0.130685	1	1	6.35742	0.27189	0.742831	1	SorTnSeq	+	intergenic_NZ_CP025085.1-nt00646039
NZ_CP025085.1	gene	646402	647103	FadR family transcriptional regulator	gene-CWC46_RS02975	-1.08234	0.189248	0.809205	0.476607	0.473131	0.921564	6.84569	0.361067	0.381737	1	RefSeq	+	CWC46_RS02975	CWC46_RS02975				Gene				CWC46_02975	Protein Homology	CDS	Genbank:WP_021013680.1	CDS	COORDINATES: similar to AA sequence:RefSeq:WP_012886680.1
NZ_CP025085.1	intergenic	647104	647427		intergenic_NZ_CP025085.1-nt00647104	-1.33843	0.289063	0.895025	-4.29976	0.125	0.608972	5.6469	-0.616748	0.359285	1	SorTnSeq	+	intergenic_NZ_CP025085.1-nt00647104
NZ_CP025085.1	gene	647428	647748	PTS sugar transporter subunit IIB	gene-CWC46_RS02980	1.32633	0.179688	0.801673	0.805008	0.726563	1	5.83137	0.894838	0.237886	1	RefSeq	+	CWC46_RS02980	CWC46_RS02980				Gene				CWC46_02980	Protein Homology	CDS	Genbank:WP_021013679.1	CDS	COORDINATES: similar to AA sequence:RefSeq:WP_015672985.1
NZ_CP025085.1	gene	647745	649067	PTS sugar transporter subunit IIC	gene-CWC46_RS02985	-0.694647	0.301999	0.900099	-1.22909	0.0659955	0.530615	7.34723	-0.153535	0.624148	1	RefSeq	+	CWC46_RS02985	CWC46_RS02985				Gene				CWC46_02985	Protein Homology	CDS	Genbank:WP_021013678.1	CDS	COORDINATES: similar to AA sequence:RefSeq:WP_012772775.1
NZ_CP025085.1	intergenic	649068	649119		intergenic_NZ_CP025085.1-nt00649068											SorTnSeq	+	intergenic_NZ_CP025085.1-nt00649068
NZ_CP025085.1	gene	649120	650508	glycoside hydrolase family 1 protein	gene-CWC46_RS02990	-0.667102	0.155005	0.760235	-0.79661	0.123734	0.608972	7.85261	0.130922	0.630005	1	RefSeq	+	CWC46_RS02990	CWC46_RS02990				Gene				CWC46_02990	Protein Homology	CDS	Genbank:WP_021013677.1	CDS	COORDINATES: similar to AA sequence:RefSeq:WP_004961081.1
NZ_CP025085.1	intergenic	650509	650520		intergenic_NZ_CP025085.1-nt00650509											SorTnSeq	+	intergenic_NZ_CP025085.1-nt00650509
NZ_CP025085.1	gene	650521	650829	PTS lactose/cellobiose transporter subunit IIA	gene-CWC46_RS02995	-1.45773	0.507813	1	-0.677641	0.753907	1	5.77245	-0.576257	0.523468	1	RefSeq	+	CWC46_RS02995	CWC46_RS02995				Gene				CWC46_02995	Protein Homology	CDS	Genbank:WP_021013676.1	CDS	COORDINATES: similar to AA sequence:RefSeq:WP_015672982.1
NZ_CP025085.1	intergenic	650830	650946		intergenic_NZ_CP025085.1-nt00650830											SorTnSeq	+	intergenic_NZ_CP025085.1-nt00650830
NZ_CP025085.1	gene	650947	651894	LacI family transcriptional regulator	gene-CWC46_RS03000	-0.00445856	1	1	-0.961218	0.20049	0.710675	7.18739	0.399451	0.203122	1	RefSeq	+	CWC46_RS03000	CWC46_RS03000				Gene				CWC46_03000	Protein Homology	CDS	Genbank:WP_037380427.1	CDS	COORDINATES: similar to AA sequence:RefSeq:WP_017798879.1
NZ_CP025085.1	intergenic	651895	651995		intergenic_NZ_CP025085.1-nt00651895	0.174129	1	1	-0.843395	0.6875	1	5.71104	0.571987	0.647607	1	SorTnSeq	+	intergenic_NZ_CP025085.1-nt00651895
NZ_CP025085.1	gene	651996	652253	DUF1471 domain-containing protein	gene-CWC46_RS03005	0.780407	0.383312	0.948327	0.179994	1	1	6.29607	-0.0925474	1	1	RefSeq	-	CWC46_RS03005	CWC46_RS03005				Gene				CWC46_03005	Protein Homology	CDS	Genbank:WP_021013674.1	CDS	COORDINATES: similar to AA sequence:RefSeq:WP_005976743.1
NZ_CP025085.1	intergenic	652254	652534		intergenic_NZ_CP025085.1-nt00652254	-1.39817	0.210114	0.835947	-0.00992682	1	1	6.66314	0.481221	0.228809	1	SorTnSeq	+	intergenic_NZ_CP025085.1-nt00652254
NZ_CP025085.1	pseudogene	652535	652943	DUF3748 domain-containing protein	gene-CWC46_RS03010	-1.0145	0.0789425	0.669728	-0.265167	0.688882	1	7.58825	0.0720292	0.928493	1	RefSeq	+	CWC46_RS03010	CWC46_RS03010			pseudo	Gene				CWC46_03010	Protein Homology	CDS		CDS	COORDINATES: similar to AA sequence:RefSeq:WP_016942745.1	frameshifted%3B internal stop
NZ_CP025085.1	intergenic	652944	653072		intergenic_NZ_CP025085.1-nt00652944											SorTnSeq	+	intergenic_NZ_CP025085.1-nt00652944
NZ_CP025085.1	gene	653073	654680	FGGY-family carbohydrate kinase	gene-CWC46_RS03015	0.545137	0.228809	0.835947	0.492492	0.237051	0.745168	7.64703	0.245954	0.39938	1	RefSeq	+	CWC46_RS03015	CWC46_RS03015				Gene				CWC46_03015	Protein Homology	CDS	Genbank:WP_021013673.1	CDS	COORDINATES: similar to AA sequence:RefSeq:WP_012886677.1
NZ_CP025085.1	intergenic	654681	654731		intergenic_NZ_CP025085.1-nt00654681											SorTnSeq	+	intergenic_NZ_CP025085.1-nt00654681
NZ_CP025085.1	gene	654732	656384	hypothetical protein	gene-CWC46_RS03020	-0.93905	0.0599433	0.642244	-0.31238	0.488687	0.931335	7.87386	-0.162709	0.46843	1	RefSeq	+	CWC46_RS03020	CWC46_RS03020				Gene				CWC46_03020	Protein Homology	CDS	Genbank:WP_021013672.1	CDS	COORDINATES: similar to AA sequence:RefSeq:WP_019845326.1
NZ_CP025085.1	intergenic	656385	656387		intergenic_NZ_CP025085.1-nt00656385											SorTnSeq	+	intergenic_NZ_CP025085.1-nt00656385
NZ_CP025085.1	gene	656388	657338	dihydrodipicolinate synthase family protein	gene-CWC46_RS03025	-0.222123	0.693953	1	-0.349027	0.705192	1	6.80214	0.0970035	0.804352	1	RefSeq	+	CWC46_RS03025	CWC46_RS03025				Gene				CWC46_03025	Protein Homology	CDS	Genbank:WP_021013671.1	CDS	COORDINATES: similar to AA sequence:RefSeq:WP_013315790.1
NZ_CP025085.1	intergenic	657339	657381		intergenic_NZ_CP025085.1-nt00657339											SorTnSeq	+	intergenic_NZ_CP025085.1-nt00657339
NZ_CP025085.1	gene	657382	658428	hypothetical protein	gene-CWC46_RS03030	-1.03933	0.0789425	0.669728	-1.16798	0.0399873	0.438943	7.46344	-0.156447	0.642672	1	RefSeq	+	CWC46_RS03030	CWC46_RS03030				Gene				CWC46_03030	Protein Homology	CDS	Genbank:WP_021013670.1	CDS	COORDINATES: similar to AA sequence:RefSeq:WP_012210240.1
NZ_CP025085.1	intergenic	658429	658478		intergenic_NZ_CP025085.1-nt00658429											SorTnSeq	+	intergenic_NZ_CP025085.1-nt00658429
NZ_CP025085.1	gene	658479	659456	tripartite tricarboxylate transporter substrate binding protein	gene-CWC46_RS03035	-1.05262	0.121451	0.716354	-0.352512	0.63583	0.999559	7.18742	0.010448	1	1	RefSeq	+	CWC46_RS03035	CWC46_RS03035				Gene				CWC46_03035	Protein Homology	CDS	Genbank:WP_021013669.1	CDS	COORDINATES: similar to AA sequence:RefSeq:WP_004249054.1
NZ_CP025085.1	intergenic	659457	659501		intergenic_NZ_CP025085.1-nt00659457											SorTnSeq	+	intergenic_NZ_CP025085.1-nt00659457
NZ_CP025085.1	gene	659502	659963	tripartite tricarboxylate transporter TctB family protein	gene-CWC46_RS03040	-1.73787	0.0783547	0.669728	-2.75696	0.00442514	0.171681	6.5624	-0.179707	0.688882	1	RefSeq	+	CWC46_RS03040	CWC46_RS03040				Gene				CWC46_03040	Protein Homology	CDS	Genbank:WP_021013668.1	CDS	COORDINATES: similar to AA sequence:RefSeq:WP_006534532.1
NZ_CP025085.1	intergenic	659964	659978		intergenic_NZ_CP025085.1-nt00659964											SorTnSeq	+	intergenic_NZ_CP025085.1-nt00659964
NZ_CP025085.1	gene	659979	661505	DUF112 domain-containing protein	gene-CWC46_RS03045	0.15777	0.819895	1	0.0275602	1	1	8.03924	0.0805576	0.754165	1	RefSeq	+	CWC46_RS03045	CWC46_RS03045				Gene				CWC46_03045	Protein Homology	CDS	Genbank:WP_021013667.1	CDS	COORDINATES: similar to AA sequence:RefSeq:WP_013253376.1
NZ_CP025085.1	intergenic	661506	661742		intergenic_NZ_CP025085.1-nt00661506	-0.00421754	1	1	-3.86754	0.125	0.608972	5.5798	-0.173967	0.80362	1	SorTnSeq	+	intergenic_NZ_CP025085.1-nt00661506
NZ_CP025085.1	gene	661743	662747	substrate-binding domain-containing protein	gene-CWC46_RS03050	-0.683521	0.252873	0.863539	-0.527793	0.340894	0.835971	7.61361	0.0886714	0.789399	1	RefSeq	+	CWC46_RS03050	CWC46_RS03050				Gene				CWC46_03050	Protein Homology	CDS	Genbank:WP_021013666.1	CDS	COORDINATES: similar to AA sequence:RefSeq:WP_012886672.1
NZ_CP025085.1	gene	662741	663109	YceK/YidQ family lipoprotein	gene-CWC46_RS03055	-0.0727893	1	1	-2.35178	0.0351566	0.427115	6.52727	0.327569	0.479891	1	RefSeq	-	CWC46_RS03055	CWC46_RS03055				Gene				CWC46_03055	Protein Homology	CDS	Genbank:WP_021013665.1	CDS	COORDINATES: similar to AA sequence:RefSeq:WP_010296872.1
NZ_CP025085.1	intergenic	663110	663429		intergenic_NZ_CP025085.1-nt00663110	0.616284	0.523468	1	0.271252	0.823803	1	6.37739	-0.178398	0.86794	1	SorTnSeq	+	intergenic_NZ_CP025085.1-nt00663110
NZ_CP025085.1	gene	663430	663843	heat shock chaperone IbpA	gene-CWC46_RS03060	-0.571856	0.503446	1	-2.53951	0.021271	0.345743	6.50934	-0.0120089	1	1	RefSeq	+	ibpA	CWC46_RS03060				Gene	ibpA			CWC46_03060	Protein Homology	CDS	Genbank:WP_021013664.1	CDS	COORDINATES: similar to AA sequence:RefSeq:WP_002209636.1
NZ_CP025085.1	intergenic	663844	663968		intergenic_NZ_CP025085.1-nt00663844											SorTnSeq	+	intergenic_NZ_CP025085.1-nt00663844
NZ_CP025085.1	gene	663969	664412	heat shock chaperone IbpB	gene-CWC46_RS03065	-0.162922	1	1	-4.02644	0.21875	0.723946	5.85987	0.628217	0.424358	1	RefSeq	+	ibpB	CWC46_RS03065				Gene	ibpB			CWC46_03065	Protein Homology	CDS	Genbank:WP_021013663.1	CDS	COORDINATES: similar to AA sequence:RefSeq:WP_012886669.1
NZ_CP025085.1	intergenic	664413	664719		intergenic_NZ_CP025085.1-nt00664413	0.283214	1	1	-0.239368	0.774414	1	6.14168	0.280502	0.720101	1	SorTnSeq	+	intergenic_NZ_CP025085.1-nt00664413
NZ_CP025085.1	gene	664720	666378	putative transporter	gene-CWC46_RS03070	-0.442382	0.197796	0.830484	-0.110044	0.780742	1	8.48659	-0.0262346	0.897104	1	RefSeq	+	CWC46_RS03070	CWC46_RS03070				Gene				CWC46_03070	Protein Homology	CDS	Genbank:WP_021013662.1	CDS	COORDINATES: similar to AA sequence:RefSeq:WP_004096777.1
NZ_CP025085.1	intergenic	666379	667024		intergenic_NZ_CP025085.1-nt00666379	0.574584	0.0422333	0.570319	0.256064	0.362688	0.850493	8.83523	0.0511183	0.812114	1	SorTnSeq	+	intergenic_NZ_CP025085.1-nt00666379
NZ_CP025085.1	gene	667025	668638	two-component system sensor histidine kinase DcuS	gene-CWC46_RS03075	-0.885438	0.0375165	0.555135	-0.923268	0.0234897	0.362665	8.32161	-0.130602	0.547723	1	RefSeq	+	dcuS	CWC46_RS03075				Gene	dcuS			CWC46_03075	Protein Homology	CDS	Genbank:WP_021013661.1	CDS	COORDINATES: similar to AA sequence:RefSeq:WP_016942755.1
NZ_CP025085.1	gene	668631	669353	two-component system response regulator DcuR	gene-CWC46_RS03080	-1.10508	0.184935	0.805114	-1.6284	0.0522398	0.491337	6.80211	-0.307943	0.463822	1	RefSeq	+	dcuR	CWC46_RS03080				Gene	dcuR			CWC46_03080	Protein Homology	CDS	Genbank:WP_021013660.1	CDS	COORDINATES: similar to AA sequence:RefSeq:WP_005976762.1
NZ_CP025085.1	intergenic	669354	669426		intergenic_NZ_CP025085.1-nt00669354											SorTnSeq	+	intergenic_NZ_CP025085.1-nt00669354
NZ_CP025085.1	gene	669427	670089	fructose-6-phosphate aldolase	gene-CWC46_RS03085	-0.713555	0.62906	1	-1.38738	0.210114	0.718687	6.52726	0.488698	0.262441	1	RefSeq	-	fsa	CWC46_RS03085				Gene	fsa			CWC46_03085	Protein Homology	CDS	Genbank:WP_021013659.1	CDS	COORDINATES: similar to AA sequence:RefSeq:WP_017384896.1
NZ_CP025085.1	intergenic	670090	670280		intergenic_NZ_CP025085.1-nt00670090											SorTnSeq	+	intergenic_NZ_CP025085.1-nt00670090
NZ_CP025085.1	gene	670281	670829	PTS glucitol/sorbitol%2C IIC subunit	gene-CWC46_RS03090	-0.43595	0.753907	1	0.386809	0.790528	1	6.23185	0.979775	0.0652466	1	RefSeq	+	srlA	CWC46_RS03090				Gene	srlA			CWC46_03090	Protein Homology	CDS	Genbank:WP_021013658.1	CDS	COORDINATES: similar to AA sequence:RefSeq:WP_004941528.1	catalyzes the phosphorylation of incoming sugar substrates along with their translocation across the cell membrane%3B the IIC domain forms the PTS system translocation channel and contains the specific substrate-binding site
NZ_CP025085.1	intergenic	670830	670844		intergenic_NZ_CP025085.1-nt00670830											SorTnSeq	+	intergenic_NZ_CP025085.1-nt00670830
NZ_CP025085.1	gene	670845	671846	PTS glucitol/sorbitol transporter subunit IIB	gene-CWC46_RS03095	-0.694648	0.232696	0.84081	-0.371925	0.479891	0.922363	7.48203	0.0711772	0.925436	1	RefSeq	+	CWC46_RS03095	CWC46_RS03095				Gene				CWC46_03095	Protein Homology	CDS	Genbank:WP_021013657.1	CDS	COORDINATES: similar to AA sequence:RefSeq:WP_017893655.1
NZ_CP025085.1	intergenic	671847	671869		intergenic_NZ_CP025085.1-nt00671847											SorTnSeq	+	intergenic_NZ_CP025085.1-nt00671847
NZ_CP025085.1	gene	671870	672232	PTS glucitol/sorbitol transporter subunit IIA	gene-CWC46_RS03100	-1.76587	0.226563	0.835947	-0.986019	0.581055	0.971935	6.18742	0.362934	0.511378	1	RefSeq	+	srlB	CWC46_RS03100				Gene	srlB	gutB		CWC46_03100	Protein Homology	CDS	Genbank:WP_021013656.1	CDS	COORDINATES: similar to AA sequence:RefSeq:WP_004716134.1
NZ_CP025085.1	intergenic	672233	672254		intergenic_NZ_CP025085.1-nt00672233											SorTnSeq	+	intergenic_NZ_CP025085.1-nt00672233
NZ_CP025085.1	gene	672255	673034	sorbitol-6-phosphate dehydrogenase	gene-CWC46_RS03105	-0.360271	0.728334	1	-0.705731	0.377088	0.868094	7.0943	0.200726	0.581119	1	RefSeq	+	srlD	CWC46_RS03105				Gene	srlD			CWC46_03105	Protein Homology	CDS	Genbank:WP_021013655.1	CDS	COORDINATES: similar to AA sequence:RefSeq:WP_015378751.1
NZ_CP025085.1	intergenic	673035	673087		intergenic_NZ_CP025085.1-nt00673035	-1.45774	0.289063	0.895025	-1.57362	0.179688	0.683602	5.74205	-0.576257	0.383312	1	SorTnSeq	+	intergenic_NZ_CP025085.1-nt00673035
NZ_CP025085.1	gene	673088	673453	transcriptional regulator GutM	gene-CWC46_RS03110											RefSeq	+	gutM	CWC46_RS03110				Gene	gutM			CWC46_03110	Protein Homology	CDS	Genbank:WP_021013654.1	CDS	COORDINATES: similar to AA sequence:RefSeq:WP_013576961.1
NZ_CP025085.1	intergenic	673454	673553		intergenic_NZ_CP025085.1-nt00673454											SorTnSeq	+	intergenic_NZ_CP025085.1-nt00673454
NZ_CP025085.1	gene	673554	674318	DNA-binding transcriptional repressor	gene-CWC46_RS03115	-0.488617	0.532711	1	-0.617466	0.348891	0.842759	7.14166	-0.385111	0.22987	1	RefSeq	+	CWC46_RS03115	CWC46_RS03115				Gene				CWC46_03115	Protein Homology	CDS	Genbank:WP_037380966.1	CDS	COORDINATES: similar to AA sequence:RefSeq:WP_013576960.1
NZ_CP025085.1	intergenic	674319	674320		intergenic_NZ_CP025085.1-nt00674319											SorTnSeq	+	intergenic_NZ_CP025085.1-nt00674319
NZ_CP025085.1	gene	674321	675286	arabinose-5-phosphate isomerase GutQ	gene-CWC46_RS03120	-0.3193	0.850555	1	-0.0417834	1	1	7.0454	0.491095	0.171065	1	RefSeq	+	gutQ	CWC46_RS03120				Gene	gutQ			CWC46_03120	Protein Homology	CDS	Genbank:WP_021013652.1	CDS	COORDINATES: similar to AA sequence:RefSeq:WP_015878958.1
NZ_CP025085.1	intergenic	675287	675550		intergenic_NZ_CP025085.1-nt00675287	-1.1927	0.301759	0.900099	-0.766993	0.454499	0.907018	6.31672	0.0288655	1	1	SorTnSeq	+	intergenic_NZ_CP025085.1-nt00675287
NZ_CP025085.1	gene	675551	676894	2-hydroxycarboxylate transporter family protein	gene-CWC46_RS03125	0.148464	0.536606	1	-0.229528	0.360408	0.847909	9.37231	0.0924532	0.509815	1	RefSeq	-	CWC46_RS03125	CWC46_RS03125				Gene				CWC46_03125	Protein Homology	CDS	Genbank:WP_037380422.1	CDS	COORDINATES: similar to AA sequence:RefSeq:WP_012886665.1
NZ_CP025085.1	intergenic	676895	678171		intergenic_NZ_CP025085.1-nt00676895	-0.333031	0.252673	0.863539	0.182557	0.399727	0.880775	9.28014	0.191283	0.174353	1	SorTnSeq	+	intergenic_NZ_CP025085.1-nt00676895
NZ_CP025085.1	gene	678172	679779	ABC transporter substrate-binding protein	gene-CWC46_RS03135	-0.37802	0.314886	0.907369	-0.441685	0.193354	0.69988	8.41132	-0.00775386	1	1	RefSeq	+	CWC46_RS03135	CWC46_RS03135				Gene				CWC46_03135	Protein Homology	CDS	Genbank:WP_021013650.1	CDS	COORDINATES: similar to AA sequence:RefSeq:WP_011817398.1
NZ_CP025085.1	intergenic	679780	679987		intergenic_NZ_CP025085.1-nt00679780	-0.312448	1	1	-0.0409835	1	1	6.18748	0.0791217	1	1	SorTnSeq	+	intergenic_NZ_CP025085.1-nt00679780
NZ_CP025085.1	gene	679988	681007	dipeptide ABC transporter permease DppB	gene-CWC46_RS03140	-0.70876	0.336786	0.925473	-0.482022	0.440802	0.907018	7.31667	0.0488488	1	1	RefSeq	+	dppB	CWC46_RS03140				Gene	dppB			CWC46_03140	Protein Homology	CDS	Genbank:WP_021013649.1	CDS	COORDINATES: similar to AA sequence:RefSeq:WP_005133865.1
NZ_CP025085.1	intergenic	681008	681019		intergenic_NZ_CP025085.1-nt00681008											SorTnSeq	+	intergenic_NZ_CP025085.1-nt00681008
NZ_CP025085.1	gene	681020	681922	dipeptide ABC transporter permease DppC	gene-CWC46_RS03145	-0.221907	0.847137	1	-0.9127	0.313648	0.805633	6.83127	0.255214	0.631835	1	RefSeq	+	dppC	CWC46_RS03145				Gene	dppC			CWC46_03145	Protein Homology	CDS	Genbank:WP_021013648.1	CDS	COORDINATES: similar to AA sequence:RefSeq:YP_005229356.1
NZ_CP025085.1	intergenic	681923	681935		intergenic_NZ_CP025085.1-nt00681923											SorTnSeq	+	intergenic_NZ_CP025085.1-nt00681923
NZ_CP025085.1	gene	681936	682916	dipeptide ABC transporter ATP-binding protein	gene-CWC46_RS03150	0.162515	1	1	-0.321727	0.720101	1	6.99482	0.13837	0.81259	1	RefSeq	+	dppD	CWC46_RS03150				Gene	dppD			CWC46_03150	Protein Homology	CDS	Genbank:WP_021013647.1	CDS	COORDINATES: similar to AA sequence:RefSeq:WP_004957243.1
NZ_CP025085.1	gene	682913	683920	ABC transporter ATP-binding protein	gene-CWC46_RS03155	-0.488617	0.429593	0.980009	-0.450718	0.542386	0.954912	7.30639	0.0535473	0.919608	1	RefSeq	+	CWC46_RS03155	CWC46_RS03155				Gene				CWC46_03155	Protein Homology	CDS	Genbank:WP_021013646.1	CDS	COORDINATES: similar to AA sequence:RefSeq:WP_015848385.1
NZ_CP025085.1	intergenic	683921	684214		intergenic_NZ_CP025085.1-nt00683921	0.307066	1	1	0.435481	0.647607	1	6.49127	0.614301	0.222055	1	SorTnSeq	+	intergenic_NZ_CP025085.1-nt00683921
NZ_CP025085.1	gene	684215	685117	EamA family transporter	gene-CWC46_RS03160	-0.225185	0.652968	1	-0.277966	0.505241	0.937974	8.19296	0.232031	0.281489	1	RefSeq	+	CWC46_RS03160	CWC46_RS03160				Gene				CWC46_03160	Protein Homology	CDS	Genbank:WP_021013645.1	CDS	COORDINATES: similar to AA sequence:RefSeq:WP_009114979.1
NZ_CP025085.1	intergenic	685118	685567		intergenic_NZ_CP025085.1-nt00685118	0.471363	0.129582	0.732555	0.185291	0.526423	0.949031	8.65522	0.17993	0.346646	1	SorTnSeq	+	intergenic_NZ_CP025085.1-nt00685118
NZ_CP025085.1	gene	685568	686143	cellulose biosynthesis protein BcsO	gene-CWC46_RS03165	0.0675903	0.880563	1	0.193815	0.427366	0.898251	9.19602	0.114651	0.446417	1	RefSeq	+	bcsO	CWC46_RS03165				Gene	bcsO			CWC46_03165	Protein Homology	CDS	Genbank:WP_021013644.1	CDS	COORDINATES: protein motif:HMM:NF028347.1
NZ_CP025085.1	gene	686134	686931	cellulose synthase operon protein YhjQ	gene-CWC46_RS03170	0.134012	0.605951	1	0.00324136	1	1	9.1272	-0.0802514	0.639033	1	RefSeq	+	yhjQ	CWC46_RS03170				Gene	yhjQ			CWC46_03170	Protein Homology	CDS	Genbank:WP_021013643.1	CDS	COORDINATES: similar to AA sequence:RefSeq:WP_013359643.1
NZ_CP025085.1	intergenic	686932	687019		intergenic_NZ_CP025085.1-nt00686932	-4.70252	0.0399697	0.555905	0.26889	1	1	6.16475	0.155192	0.866578	1	SorTnSeq	+	intergenic_NZ_CP025085.1-nt00686932
NZ_CP025085.1	gene	687020	689140	UDP-forming cellulose synthase catalytic subunit	gene-CWC46_RS03175	0.0116806	1	1	0.352891	0.0733232	0.54549	9.7327	-0.0127722	0.966301	1	RefSeq	+	bcsA	CWC46_RS03175				Gene	bcsA			CWC46_03175	Protein Homology	CDS	Genbank:WP_021013642.1	CDS	COORDINATES: similar to AA sequence:RefSeq:WP_017345697.1
NZ_CP025085.1	gene	689137	691632	cellulose biosynthesis cyclic di-GMP-binding regulatory protein BcsB	gene-CWC46_RS03180	-0.00450627	1	1	-0.454504	0.256448	0.767807	8.37718	0.116156	0.590593	1	RefSeq	+	bcsB	CWC46_RS03180				Gene	bcsB			CWC46_03180	Protein Homology	CDS	Genbank:WP_021013641.1	CDS	COORDINATES: similar to AA sequence:RefSeq:WP_015855539.1
NZ_CP025085.1	intergenic	691633	691645		intergenic_NZ_CP025085.1-nt00691633											SorTnSeq	+	intergenic_NZ_CP025085.1-nt00691633
NZ_CP025085.1	gene	691646	695404	cellulose biosynthesis protein BcsC	gene-CWC46_RS03185	-1.11142	0.000638439	0.0618427	-0.980606	0.00163165	0.100838	8.91827	-0.0929816	0.558867	1	RefSeq	+	CWC46_RS03185	CWC46_RS03185				Gene				CWC46_03185	Protein Homology	CDS	Genbank:WP_021013640.1	CDS	COORDINATES: similar to AA sequence:RefSeq:WP_010671650.1
NZ_CP025085.1	intergenic	695405	695406		intergenic_NZ_CP025085.1-nt00695405											SorTnSeq	+	intergenic_NZ_CP025085.1-nt00695405
NZ_CP025085.1	gene	695407	695898	cellulose synthase	gene-CWC46_RS03190	-0.244045	1	1	-0.766993	0.62906	0.998478	6.41627	0.210206	0.760793	1	RefSeq	+	CWC46_RS03190	CWC46_RS03190				Gene				CWC46_03190	Protein Homology	CDS	Genbank:WP_021013639.1	CDS	COORDINATES: similar to AA sequence:RefSeq:WP_015855537.1
NZ_CP025085.1	gene	695895	696893	glycoside hydrolase family 8	gene-CWC46_RS03195	0.142943	1	1	-1.23995	0.179566	0.683602	6.50936	0.592705	0.193415	1	RefSeq	+	CWC46_RS03195	CWC46_RS03195				Gene				CWC46_03195	Protein Homology	CDS	Genbank:WP_021013638.1	CDS	COORDINATES: similar to AA sequence:RefSeq:WP_017799690.1
NZ_CP025085.1	intergenic	696894	697119		intergenic_NZ_CP025085.1-nt00696894											SorTnSeq	+	intergenic_NZ_CP025085.1-nt00696894
NZ_CP025085.1	gene	697120	697440	hypothetical protein	gene-CWC46_RS03200											RefSeq	+	CWC46_RS03200	CWC46_RS03200				Gene				CWC46_03200	GeneMarkS-2+	CDS	Genbank:WP_021013637.1	CDS	COORDINATES: ab initio prediction:GeneMarkS-2+
NZ_CP025085.1	gene	697421	698707	dicarboxylate/amino acid:cation symporter	gene-CWC46_RS03205	0.345263	0.705192	1	-0.188602	0.840856	1	6.71105	0.0304525	1	1	RefSeq	+	CWC46_RS03205	CWC46_RS03205				Gene				CWC46_03205	Protein Homology	CDS	Genbank:WP_021013636.1	CDS	COORDINATES: similar to AA sequence:RefSeq:WP_016942772.1
NZ_CP025085.1	intergenic	698708	698980		intergenic_NZ_CP025085.1-nt00698708	0.478669	0.647607	1	0.923324	0.28628	0.782459	6.63047	0.673543	0.143868	1	SorTnSeq	+	intergenic_NZ_CP025085.1-nt00698708
NZ_CP025085.1	gene	698981	700462	insulinase family protein	gene-CWC46_RS03210	-0.00448087	1	1	-0.134133	0.889885	1	7.67923	0.400491	0.132631	1	RefSeq	+	CWC46_RS03210	CWC46_RS03210				Gene				CWC46_03210	Protein Homology	CDS	Genbank:WP_021013635.1	CDS	COORDINATES: similar to AA sequence:RefSeq:WP_012772827.1
NZ_CP025085.1	intergenic	700463	700607		intergenic_NZ_CP025085.1-nt00700463											SorTnSeq	+	intergenic_NZ_CP025085.1-nt00700463
NZ_CP025085.1	gene	700608	701549	sugar kinase	gene-CWC46_RS03215	-0.360272	0.728334	1	0.151434	0.871415	1	7.16473	0.230846	0.510415	1	RefSeq	-	CWC46_RS03215	CWC46_RS03215				Gene				CWC46_03215	Protein Homology	CDS	Genbank:WP_021013634.1	CDS	COORDINATES: similar to AA sequence:RefSeq:WP_014917059.1
NZ_CP025085.1	intergenic	701550	701727		intergenic_NZ_CP025085.1-nt00701550	0.512703	0.774414	1	-0.00967444	1	1	5.94241	-0.0547941	1	1	SorTnSeq	+	intergenic_NZ_CP025085.1-nt00701550
NZ_CP025085.1	gene	701728	701925	4-oxalocrotonate tautomerase family protein	gene-CWC46_RS03220	0.377673	1	1	-0.639527	1	1	5.5798	0.383275	0.790528	1	RefSeq	-	CWC46_RS03220	CWC46_RS03220				Gene				CWC46_03220	Protein Homology	CDS	Genbank:WP_021013633.1	CDS	COORDINATES: similar to AA sequence:RefSeq:WP_013315829.1
NZ_CP025085.1	intergenic	701926	701981		intergenic_NZ_CP025085.1-nt00701926											SorTnSeq	+	intergenic_NZ_CP025085.1-nt00701926
NZ_CP025085.1	gene	701982	702974	inner membrane protein YhjD	gene-CWC46_RS03225	-1.10163	0.191479	0.816073	-1.62525	0.0311815	0.417716	7.04529	0.334416	0.347019	1	RefSeq	-	yhjD	CWC46_RS03225				Gene	yhjD			CWC46_03225	Protein Homology	CDS	Genbank:WP_021013632.1	CDS	COORDINATES: similar to AA sequence:RefSeq:WP_005976404.1
NZ_CP025085.1	intergenic	702975	703220		intergenic_NZ_CP025085.1-nt00702975	0.704836	0.607239	1	-0.129088	1	1	6.1417	0.392818	0.584666	1	SorTnSeq	+	intergenic_NZ_CP025085.1-nt00702975
NZ_CP025085.1	gene	703221	704441	MFS transporter	gene-CWC46_RS03230	-0.321653	0.643971	1	-1.02301	0.143309	0.636147	7.37717	0.278259	0.382132	1	RefSeq	+	CWC46_RS03230	CWC46_RS03230				Gene				CWC46_03230	Protein Homology	CDS	Genbank:WP_021013631.1	CDS	COORDINATES: similar to AA sequence:RefSeq:WP_012886645.1
NZ_CP025085.1	intergenic	704442	704486		intergenic_NZ_CP025085.1-nt00704442											SorTnSeq	+	intergenic_NZ_CP025085.1-nt00704442
NZ_CP025085.1	gene	704487	705050	DcrB family lipoprotein	gene-CWC46_RS03235											RefSeq	-	dcrB	CWC46_RS03235				Gene	dcrB			CWC46_03235	Protein Homology	CDS	Genbank:WP_021013630.1	CDS	COORDINATES: similar to AA sequence:RefSeq:WP_014917056.1
NZ_CP025085.1	intergenic	705051	705192		intergenic_NZ_CP025085.1-nt00705051											SorTnSeq	+	intergenic_NZ_CP025085.1-nt00705051
NZ_CP025085.1	gene	705193	705870	7-cyano-7-deazaguanine/7-aminomethyl-7-deazaguanine transporter	gene-CWC46_RS03240	-0.00436975	1	1	-0.130685	1	1	6.31677	0.27189	0.627104	1	RefSeq	-	CWC46_RS03240	CWC46_RS03240				Gene				CWC46_03240	Protein Homology	CDS	Genbank:WP_021013629.1	CDS	COORDINATES: similar to AA sequence:RefSeq:WP_019845359.1
NZ_CP025085.1	intergenic	705871	706089		intergenic_NZ_CP025085.1-nt00705871	-0.305885	1	1	-0.428031	1	1	5.83134	0.0782501	1	1	SorTnSeq	+	intergenic_NZ_CP025085.1-nt00705871
NZ_CP025085.1	gene	706090	706335	sulfurtransferase TusA	gene-CWC46_RS03245											RefSeq	+	tusA	CWC46_RS03245				Gene	tusA			CWC46_03245	Protein Homology	CDS	Genbank:WP_021013628.1	CDS	COORDINATES: similar to AA sequence:RefSeq:WP_011095816.1
NZ_CP025085.1	intergenic	706336	706401		intergenic_NZ_CP025085.1-nt00706336											SorTnSeq	+	intergenic_NZ_CP025085.1-nt00706336
NZ_CP025085.1	gene	706402	708708	zinc/cadmium/mercury/lead-transporting ATPase	gene-CWC46_RS03250	-1.17877	0.0125033	0.358559	-0.489092	0.301877	0.790627	7.93552	-0.146682	0.640569	1	RefSeq	-	CWC46_RS03250	CWC46_RS03250				Gene				CWC46_03250	Protein Homology	CDS	Genbank:WP_021013627.1	CDS	COORDINATES: similar to AA sequence:RefSeq:WP_004391327.1
NZ_CP025085.1	intergenic	708709	708803		intergenic_NZ_CP025085.1-nt00708709											SorTnSeq	+	intergenic_NZ_CP025085.1-nt00708709
NZ_CP025085.1	gene	708804	709433	lysoplasmalogenase	gene-CWC46_RS03255	-1.68652	0.0635688	0.644721	0.10714	1	1	6.67931	-0.0779731	1	1	RefSeq	-	CWC46_RS03255	CWC46_RS03255				Gene				CWC46_03255	Protein Homology	CDS	Genbank:WP_021013626.1	CDS	COORDINATES: similar to AA sequence:RefSeq:WP_005976416.1
NZ_CP025085.1	intergenic	709434	709692		intergenic_NZ_CP025085.1-nt00709434	-1.57799	0.0962532	0.700618	0.0271411	1	1	6.66318	0.126528	0.893854	1	SorTnSeq	+	intergenic_NZ_CP025085.1-nt00709434
NZ_CP025085.1	gene	709693	710019	DUF1820 family protein	gene-CWC46_RS03260											RefSeq	+	CWC46_RS03260	CWC46_RS03260				Gene				CWC46_03260	Protein Homology	CDS	Genbank:WP_021013625.1	CDS	COORDINATES: similar to AA sequence:RefSeq:WP_011095813.1
NZ_CP025085.1	intergenic	710020	710093		intergenic_NZ_CP025085.1-nt00710020											SorTnSeq	+	intergenic_NZ_CP025085.1-nt00710020
NZ_CP025085.1	gene	710094	710384	DUF1145 family protein	gene-CWC46_RS03265											RefSeq	-	CWC46_RS03265	CWC46_RS03265				Gene				CWC46_03265	Protein Homology	CDS	Genbank:WP_021013624.1	CDS	COORDINATES: similar to AA sequence:RefSeq:WP_015848359.1
NZ_CP025085.1	intergenic	710385	710415		intergenic_NZ_CP025085.1-nt00710385											SorTnSeq	+	intergenic_NZ_CP025085.1-nt00710385
NZ_CP025085.1	gene	710416	710991	16S rRNA (guanine(966)-N(2))-methyltransferase	gene-CWC46_RS03270	-1.33288	0.210114	0.835947	-0.200087	1	1	6.31675	-0.396839	0.5224	1	RefSeq	-	rsmD	CWC46_RS03270				Gene	rsmD			CWC46_03270	Protein Homology	CDS	Genbank:WP_021013623.1	CDS	COORDINATES: similar to AA sequence:RefSeq:WP_012772841.1
NZ_CP025085.1	intergenic	710992	711297		intergenic_NZ_CP025085.1-nt00710992	-0.168493	0.80362	1	-2.13593	0.0922857	0.591613	6.23186	-0.102042	1	1	SorTnSeq	+	intergenic_NZ_CP025085.1-nt00710992
NZ_CP025085.1	gene	711298	712608	signal recognition particle-docking protein FtsY	gene-CWC46_RS03275											RefSeq	+	ftsY	CWC46_RS03275				Gene	ftsY			CWC46_03275	Protein Homology	CDS	Genbank:WP_021013622.1	CDS	COORDINATES: similar to AA sequence:RefSeq:WP_009114878.1
NZ_CP025085.1	intergenic	712609	712634		intergenic_NZ_CP025085.1-nt00712609											SorTnSeq	+	intergenic_NZ_CP025085.1-nt00712609
NZ_CP025085.1	gene	712635	713315	cell division ATP-binding protein FtsE	gene-CWC46_RS03280	0.540732	0.523468	1	-0.37051	0.62906	0.998478	6.43543	0.028866	1	1	RefSeq	+	ftsE	CWC46_RS03280				Gene	ftsE			CWC46_03280	Protein Homology	CDS	Genbank:WP_021013621.1	CDS	COORDINATES: similar to AA sequence:RefSeq:WP_012004692.1
NZ_CP025085.1	gene	713296	714264	cell division protein FtsX	gene-CWC46_RS03285	-0.0911229	1	1	-2.05647	0.148581	0.641305	6.29596	0.248127	0.754219	1	RefSeq	+	ftsX	CWC46_RS03285				Gene	ftsX			CWC46_03285	Protein Homology	CDS	Genbank:WP_021013620.1	CDS	COORDINATES: similar to AA sequence:RefSeq:WP_004957534.1
NZ_CP025085.1	intergenic	714265	714569		intergenic_NZ_CP025085.1-nt00714265											SorTnSeq	+	intergenic_NZ_CP025085.1-nt00714265
NZ_CP025085.1	gene	714570	715427	RNA polymerase sigma factor RpoH	gene-CWC46_RS03290											RefSeq	+	rpoH	CWC46_RS03290				Gene	rpoH			CWC46_03290	Protein Homology	CDS	Genbank:WP_021013619.1	CDS	COORDINATES: similar to AA sequence:RefSeq:WP_006708562.1
NZ_CP025085.1	intergenic	715428	715501		intergenic_NZ_CP025085.1-nt00715428											SorTnSeq	+	intergenic_NZ_CP025085.1-nt00715428
NZ_CP025085.1	gene	715502	715906	aspartate 1-decarboxylase autocleavage activator PanM	gene-CWC46_RS03295	-1.9399	0.145997	0.738339	-0.611617	0.607239	0.986286	6.18744	-0.0212036	1	1	RefSeq	-	panM	CWC46_RS03295				Gene	panM			CWC46_03295	Protein Homology	CDS	Genbank:WP_021013618.1	CDS	COORDINATES: similar to AA sequence:RefSeq:WP_014917049.1
NZ_CP025085.1	intergenic	715907	716310		intergenic_NZ_CP025085.1-nt00715907											SorTnSeq	+	intergenic_NZ_CP025085.1-nt00715907
NZ_CP025085.1	gene	716311	717423	branched-chain amino acid ABC transporter substrate-binding protein	gene-CWC46_RS03300	-0.210313	0.73588	1	0.112533	1	1	7.16474	0.130811	0.740656	1	RefSeq	+	CWC46_RS03300	CWC46_RS03300				Gene				CWC46_03300	Protein Homology	CDS	Genbank:WP_021013617.1	CDS	COORDINATES: similar to AA sequence:RefSeq:WP_013811084.1
NZ_CP025085.1	intergenic	717424	717501		intergenic_NZ_CP025085.1-nt00717424	-1.20837	0.453125	0.982097	0.120522	1	1	5.71106	-0.483704	0.480683	1	SorTnSeq	+	intergenic_NZ_CP025085.1-nt00717424
NZ_CP025085.1	gene	717502	718428	high-affinity branched-chain amino acid ABC transporter permease LivH	gene-CWC46_RS03305	-0.43703	0.499562	1	0.0746536	1	1	7.19867	0.183082	0.746537	1	RefSeq	+	livH	CWC46_RS03305				Gene	livH			CWC46_03305	Protein Homology	CDS	Genbank:WP_021013616.1	CDS	COORDINATES: similar to AA sequence:RefSeq:WP_010436488.1
NZ_CP025085.1	gene	718425	719699	high-affinity branched-chain amino acid ABC transporter permease LivM	gene-CWC46_RS03310	-2.95651	0.00291096	0.169125	-0.921932	0.142091	0.636147	6.81673	-0.22202	0.642548	1	RefSeq	+	CWC46_RS03310	CWC46_RS03310				Gene				CWC46_03310	Protein Homology	CDS	Genbank:WP_021013615.1	CDS	COORDINATES: similar to AA sequence:RefSeq:WP_012104327.1
NZ_CP025085.1	gene	719696	720466	high-affinity branched-chain amino acid ABC transporter ATP-binding protein LivG	gene-CWC46_RS03315	-0.365694	0.850555	1	-0.276763	0.855536	1	6.87396	-0.00694441	1	1	RefSeq	+	livG	CWC46_RS03315				Gene	livG			CWC46_03315	Protein Homology	CDS	Genbank:WP_021013614.1	CDS	COORDINATES: similar to AA sequence:RefSeq:WP_009114886.1
NZ_CP025085.1	gene	720435	721172	high-affinity branched-chain amino acid ABC transporter ATP-binding protein LivF	gene-CWC46_RS03320	-0.454232	0.45826	0.982097	-0.0100142	1	1	6.98189	0.05829	0.906295	1	RefSeq	+	livF	CWC46_RS03320				Gene	livF			CWC46_03320	Protein Homology	CDS	Genbank:WP_071790835.1	CDS	COORDINATES: similar to AA sequence:RefSeq:WP_014172000.1
NZ_CP025085.1	intergenic	721173	721265		intergenic_NZ_CP025085.1-nt00721173											SorTnSeq	+	intergenic_NZ_CP025085.1-nt00721173
NZ_CP025085.1	gene	721266	722450	PLP-dependent aminotransferase family protein	gene-CWC46_RS03325	-1.01835	0.229483	0.835947	-0.318233	0.511378	0.939907	7.07008	-0.251899	0.499901	1	RefSeq	+	CWC46_RS03325	CWC46_RS03325				Gene				CWC46_03325	Protein Homology	CDS	Genbank:WP_021013612.1	CDS	COORDINATES: similar to AA sequence:RefSeq:WP_019455304.1
NZ_CP025085.1	intergenic	722451	722583		intergenic_NZ_CP025085.1-nt00722451											SorTnSeq	+	intergenic_NZ_CP025085.1-nt00722451
NZ_CP025085.1	gene	722584	724239	methyl-accepting chemotaxis sensory transducer	gene-CWC46_RS03330	0.0924516	0.706377	1	0.0228957	0.940613	1	9.11825	0.0209377	1	1	RefSeq	-	CWC46_RS03330	CWC46_RS03330				Gene				CWC46_03330	Protein Homology	CDS	Genbank:WP_021013611.1	CDS	COORDINATES: similar to AA sequence:RefSeq:WP_020628740.1
NZ_CP025085.1	intergenic	724240	724834		intergenic_NZ_CP025085.1-nt00724240	0.351557	0.23494	0.84686	0.220885	0.497572	0.937974	8.81697	0.157331	0.376808	1	SorTnSeq	+	intergenic_NZ_CP025085.1-nt00724240
NZ_CP025085.1	gene	724835	726190	GntP family transporter	gene-CWC46_RS03335	0.183868	0.329749	0.921205	0.210188	0.21127	0.719032	10.185	-0.00386108	0.971333	1	RefSeq	-	CWC46_RS03335	CWC46_RS03335				Gene				CWC46_03335	Protein Homology	CDS	Genbank:WP_021013609.1	CDS	COORDINATES: similar to AA sequence:RefSeq:WP_011095795.1
NZ_CP025085.1	intergenic	726191	726419		intergenic_NZ_CP025085.1-nt00726191	0.575357	0.214543	0.835947	0.575506	0.148036	0.640598	7.88108	0.383463	0.147599	1	SorTnSeq	+	intergenic_NZ_CP025085.1-nt00726191
NZ_CP025085.1	gene	726420	727196	hydroxypyruvate isomerase family protein	gene-CWC46_RS03340	0.462008	0.00488513	0.229966	0.307181	0.0635255	0.526908	10.1512	-0.0794983	0.481985	1	RefSeq	-	CWC46_RS03340	CWC46_RS03340				Gene				CWC46_03340	Protein Homology	CDS	Genbank:WP_021013608.1	CDS	COORDINATES: similar to AA sequence:RefSeq:WP_005184974.1
NZ_CP025085.1	intergenic	727197	727198		intergenic_NZ_CP025085.1-nt00727197											SorTnSeq	+	intergenic_NZ_CP025085.1-nt00727197
NZ_CP025085.1	gene	727199	727840	aldolase	gene-CWC46_RS03345	-0.855803	0.164152	0.78003	-0.795845	0.174174	0.683602	7.50922	0.273035	0.359366	1	RefSeq	-	CWC46_RS03345	CWC46_RS03345				Gene				CWC46_03345	Protein Homology	CDS	Genbank:WP_021013607.1	CDS	COORDINATES: similar to AA sequence:RefSeq:WP_013204298.1
NZ_CP025085.1	gene	727837	729111	four-carbon acid sugar kinase family protein	gene-CWC46_RS03350	-1.25668	0.0540775	0.637912	-0.812666	0.160782	0.668202	7.62189	0.20667	0.48803	1	RefSeq	-	CWC46_RS03350	CWC46_RS03350				Gene				CWC46_03350	Protein Homology	CDS	Genbank:WP_021013606.1	CDS	COORDINATES: similar to AA sequence:RefSeq:WP_000912488.1
NZ_CP025085.1	gene	729108	730022	NAD(P)-dependent oxidoreductase	gene-CWC46_RS03355	-1.15081	0.0576138	0.639208	-1.02301	0.143309	0.636147	7.19858	-0.0587849	0.917924	1	RefSeq	-	CWC46_RS03355	CWC46_RS03355				Gene				CWC46_03355	Protein Homology	CDS	Genbank:WP_021013605.1	CDS	COORDINATES: similar to AA sequence:RefSeq:WP_014917036.1
NZ_CP025085.1	intergenic	730023	730322		intergenic_NZ_CP025085.1-nt00730023											SorTnSeq	+	intergenic_NZ_CP025085.1-nt00730023
NZ_CP025085.1	gene	730323	731084	DeoR/GlpR transcriptional regulator	gene-CWC46_RS03360	-0.0480244	1	1	-1.14942	0.191479	0.698478	6.81684	-0.316334	0.464729	1	RefSeq	+	CWC46_RS03360	CWC46_RS03360				Gene				CWC46_03360	Protein Homology	CDS	Genbank:WP_021013604.1	CDS	COORDINATES: similar to AA sequence:RefSeq:WP_004876157.1
NZ_CP025085.1	intergenic	731085	731519		intergenic_NZ_CP025085.1-nt00731085	-0.168492	1	1	-0.691396	0.80362	1	6.45423	0.447824	0.371301	1	SorTnSeq	+	intergenic_NZ_CP025085.1-nt00731085
NZ_CP025085.1	gene	731520	732839	sn-glycerol-3-phosphate ABC transporter substrate-binding protein UgpB	gene-CWC46_RS03365	-0.300955	0.602926	1	0.384736	0.349186	0.842759	7.87399	0.17454	0.506605	1	RefSeq	+	ugpB	CWC46_RS03365				Gene	ugpB			CWC46_03365	Protein Homology	CDS	Genbank:WP_021013603.1	CDS	COORDINATES: similar to AA sequence:RefSeq:WP_012886609.1
NZ_CP025085.1	intergenic	732840	732892		intergenic_NZ_CP025085.1-nt00732840											SorTnSeq	+	intergenic_NZ_CP025085.1-nt00732840
NZ_CP025085.1	gene	732893	733780	sn-glycerol-3-phosphate ABC transporter permease UgpA	gene-CWC46_RS03370	-1.14746	0.0556265	0.639208	0.0182536	1	1	7.03293	0.00480863	1	1	RefSeq	+	ugpA	CWC46_RS03370				Gene	ugpA			CWC46_03370	Protein Homology	CDS	Genbank:WP_021013602.1	CDS	COORDINATES: similar to AA sequence:RefSeq:WP_004703935.1
NZ_CP025085.1	intergenic	733781	733791		intergenic_NZ_CP025085.1-nt00733781											SorTnSeq	+	intergenic_NZ_CP025085.1-nt00733781
NZ_CP025085.1	gene	733792	734640	sn-glycerol-3-phosphate ABC transporter permease UgpE	gene-CWC46_RS03375	-1.23652	0.133802	0.738339	-0.965542	0.307458	0.798693	6.87383	0.382112	0.342475	1	RefSeq	+	ugpE	CWC46_RS03375				Gene	ugpE			CWC46_03375	Protein Homology	CDS	Genbank:WP_021013601.1	CDS	COORDINATES: similar to AA sequence:RefSeq:WP_002211522.1
NZ_CP025085.1	intergenic	734641	734721		intergenic_NZ_CP025085.1-nt00734641											SorTnSeq	+	intergenic_NZ_CP025085.1-nt00734641
NZ_CP025085.1	gene	734722	735798	sn-glycerol-3-phosphate import ATP-binding protein UgpC	gene-CWC46_RS03380	-1.76178	0.0161252	0.400112	-0.519259	0.5224	0.947434	7.10623	-0.114003	0.828425	1	RefSeq	+	CWC46_RS03380	CWC46_RS03380				Gene				CWC46_03380	Protein Homology	CDS	Genbank:WP_021013600.1	CDS	COORDINATES: similar to AA sequence:RefSeq:WP_016942807.1
NZ_CP025085.1	gene	735795	736544	glycerophosphodiester phosphodiesterase	gene-CWC46_RS03385	-1.73787	0.0783547	0.669728	-1.86098	0.0783547	0.553711	6.80204	0.398489	0.335562	1	RefSeq	+	ugpQ	CWC46_RS03385				Gene	ugpQ			CWC46_03385	Protein Homology	CDS	Genbank:WP_021013599.1	CDS	COORDINATES: similar to AA sequence:RefSeq:WP_005976460.1
NZ_CP025085.1	intergenic	736545	736609		intergenic_NZ_CP025085.1-nt00736545											SorTnSeq	+	intergenic_NZ_CP025085.1-nt00736545
NZ_CP025085.1	gene	736610	737566	AEC family transporter	gene-CWC46_RS03390	-0.933126	0.326941	0.921205	-0.49374	0.57159	0.969395	6.8168	-0.0482866	1	1	RefSeq	+	CWC46_RS03390	CWC46_RS03390				Gene				CWC46_03390	Protein Homology	CDS	Genbank:WP_021013598.1	CDS	COORDINATES: similar to AA sequence:RefSeq:WP_012772873.1
NZ_CP025085.1	intergenic	737567	737583		intergenic_NZ_CP025085.1-nt00737567											SorTnSeq	+	intergenic_NZ_CP025085.1-nt00737567
NZ_CP025085.1	gene	737584	737823	hypothetical protein	gene-CWC46_RS03395	0.725063	0.507813	1	0.0525868	1	1	5.50947	-0.923066	0.548829	1	RefSeq	-	CWC46_RS03395	CWC46_RS03395				Gene				CWC46_03395	Protein Homology	CDS	Genbank:WP_101377532.1	CDS	COORDINATES: similar to AA sequence:RefSeq:WP_020628741.1
NZ_CP025085.1	intergenic	737824	738031		intergenic_NZ_CP025085.1-nt00737824	0.642768	0.774414	1	0.120523	1	1	5.96888	0.294001	0.83882	1	SorTnSeq	+	intergenic_NZ_CP025085.1-nt00737824
NZ_CP025085.1	gene	738032	738496	tRNA (cytidine(34)-2'-O)-methyltransferase	gene-CWC46_RS03400	-0.713555	0.62906	1	-0.442343	0.647607	1	6.33723	-0.178763	0.87463	1	RefSeq	+	CWC46_RS03400	CWC46_RS03400				Gene				CWC46_03400	Protein Homology	CDS	Genbank:WP_021013596.1	CDS	COORDINATES: similar to AA sequence:RefSeq:WP_015848330.1
NZ_CP025085.1	intergenic	738497	738566		intergenic_NZ_CP025085.1-nt00738497											SorTnSeq	+	intergenic_NZ_CP025085.1-nt00738497
NZ_CP025085.1	gene	738567	739328	DUF3142 domain-containing protein	gene-CWC46_RS03405	0.289	0.711072	1	0.476608	0.473131	0.921564	7.02037	0.634095	0.0959267	1	RefSeq	-	CWC46_RS03405	CWC46_RS03405				Gene				CWC46_03405	Protein Homology	CDS	Genbank:WP_021013595.1	CDS	COORDINATES: similar to AA sequence:RefSeq:WP_013315865.1
NZ_CP025085.1	gene	739298	741499	hypothetical protein	gene-CWC46_RS03410	0.087726	0.897423	1	-0.232779	0.794845	1	7.76485	0.176812	0.49127	1	RefSeq	-	CWC46_RS03410	CWC46_RS03410				Gene				CWC46_03410	Protein Homology	CDS	Genbank:WP_021013594.1	CDS	COORDINATES: similar to AA sequence:RefSeq:WP_010308730.1
NZ_CP025085.1	intergenic	741500	741731		intergenic_NZ_CP025085.1-nt00741500	0.0852699	1	1	-0.986019	0.581055	0.971935	5.9424	-0.889953	0.151591	1	SorTnSeq	+	intergenic_NZ_CP025085.1-nt00741500
NZ_CP025085.1	gene	741732	743102	envelope stress sensor histidine kinase CpxA	gene-CWC46_RS03415	1.96019	0.000312571	0.0349871	-1.23995	0.179566	0.683602	6.61388	0.228803	0.643971	1	RefSeq	-	cpxA	CWC46_RS03415				Gene	cpxA			CWC46_03415	Protein Homology	CDS	Genbank:WP_021013593.1	CDS	COORDINATES: similar to AA sequence:RefSeq:WP_017491038.1
NZ_CP025085.1	gene	743099	743797	envelope stress response regulator transcription factor CpxR	gene-CWC46_RS03420	-0.947271	0.149614	0.747627	-1.07491	0.110186	0.608972	7.09426	0.0863219	0.828425	1	RefSeq	-	cpxR	CWC46_RS03420				Gene	cpxR			CWC46_03420	Protein Homology	CDS	Genbank:WP_021013592.1	CDS	COORDINATES: similar to AA sequence:RefSeq:NP_462940.1
NZ_CP025085.1	intergenic	743798	743948		intergenic_NZ_CP025085.1-nt00743798	-1.56792	0.179688	0.801673	-0.787922	0.774414	1	5.9948	0.114479	1	1	SorTnSeq	+	intergenic_NZ_CP025085.1-nt00743798
NZ_CP025085.1	gene	743949	744446	periplasmic heavy metal sensor	gene-CWC46_RS03425											RefSeq	+	CWC46_RS03425	CWC46_RS03425				Gene				CWC46_03425	Protein Homology	CDS	Genbank:WP_021013591.1	CDS	COORDINATES: similar to AA sequence:RefSeq:WP_012772879.1
NZ_CP025085.1	intergenic	744447	744980		intergenic_NZ_CP025085.1-nt00744447	0.118924	1	1	-0.837794	0.264933	0.767807	6.98187	0.0944509	0.906295	1	SorTnSeq	+	intergenic_NZ_CP025085.1-nt00744447
NZ_CP025085.1	gene	744981	745796	ABC transporter substrate-binding protein	gene-CWC46_RS03430	0.34646	0.195677	0.824099	0.308528	0.266835	0.767807	8.8847	-0.0269731	0.907641	1	RefSeq	+	CWC46_RS03430	CWC46_RS03430				Gene				CWC46_03430	Protein Homology	CDS	Genbank:WP_051391437.1	CDS	COORDINATES: similar to AA sequence:RefSeq:WP_017454257.1
NZ_CP025085.1	intergenic	745797	745898		intergenic_NZ_CP025085.1-nt00745797	0.152152	0.765993	1	0.0226654	1	1	7.27501	-0.115539	0.749332	1	SorTnSeq	+	intergenic_NZ_CP025085.1-nt00745797
NZ_CP025085.1	gene	745899	746597	amino acid ABC transporter permease	gene-CWC46_RS03435	0.655616	1.91333e-05	0.00481873	0.485883	0.00137339	0.0913767	10.3194	-0.0555833	0.620025	1	RefSeq	+	CWC46_RS03435	CWC46_RS03435				Gene				CWC46_03435	Protein Homology	CDS	Genbank:WP_021013589.1	CDS	COORDINATES: similar to AA sequence:RefSeq:WP_017454258.1
NZ_CP025085.1	intergenic	746598	746607		intergenic_NZ_CP025085.1-nt00746598											SorTnSeq	+	intergenic_NZ_CP025085.1-nt00746598
NZ_CP025085.1	gene	746608	747300	amino acid ABC transporter permease	gene-CWC46_RS03440	-0.1717	0.480342	0.99597	0.200144	0.319563	0.81647	9.85122	-0.0757879	0.574933	1	RefSeq	+	CWC46_RS03440	CWC46_RS03440				Gene				CWC46_03440	Protein Homology	CDS	Genbank:WP_037380957.1	CDS	COORDINATES: similar to AA sequence:RefSeq:WP_019579787.1
NZ_CP025085.1	intergenic	747301	747310		intergenic_NZ_CP025085.1-nt00747301											SorTnSeq	+	intergenic_NZ_CP025085.1-nt00747301
NZ_CP025085.1	gene	747311	748036	amino acid ABC transporter ATP-binding protein	gene-CWC46_RS03445	0.0614571	0.870781	1	-0.069211	0.87162	1	8.90863	0.016535	1	1	RefSeq	+	CWC46_RS03445	CWC46_RS03445				Gene				CWC46_03445	Protein Homology	CDS	Genbank:WP_021013587.1	CDS	COORDINATES: similar to AA sequence:RefSeq:WP_000631384.1
NZ_CP025085.1	intergenic	748037	748050		intergenic_NZ_CP025085.1-nt00748037											SorTnSeq	+	intergenic_NZ_CP025085.1-nt00748037
NZ_CP025085.1	gene	748051	749253	pyridoxal phosphate-dependent aminotransferase	gene-CWC46_RS03450	-1.11136	0.0649104	0.644721	-1.24003	0.0132839	0.293192	7.57099	-0.0252383	0.929615	1	RefSeq	+	CWC46_RS03450	CWC46_RS03450				Gene				CWC46_03450	Protein Homology	CDS	Genbank:WP_021013586.1	CDS	COORDINATES: similar to AA sequence:RefSeq:WP_017345940.1
NZ_CP025085.1	intergenic	749254	749375		intergenic_NZ_CP025085.1-nt00749254											SorTnSeq	+	intergenic_NZ_CP025085.1-nt00749254
NZ_CP025085.1	gene	749376	750596	MFS transporter	gene-CWC46_RS03455	0.021232	1	1	-1.09215	0.0540775	0.493457	7.62201	0.225025	0.374965	1	RefSeq	+	CWC46_RS03455	CWC46_RS03455				Gene				CWC46_03455	Protein Homology	CDS	Genbank:WP_021013585.1	CDS	COORDINATES: protein motif:HMM:NF017760.1
NZ_CP025085.1	intergenic	750597	750625		intergenic_NZ_CP025085.1-nt00750597											SorTnSeq	+	intergenic_NZ_CP025085.1-nt00750597
NZ_CP025085.1	gene	750626	751549	2-hydroxyacid dehydrogenase	gene-CWC46_RS03460	-0.839934	0.213651	0.835947	-0.180949	1	1	6.63042	-0.511169	0.219714	1	RefSeq	+	CWC46_RS03460	CWC46_RS03460				Gene				CWC46_03460	Protein Homology	CDS	Genbank:WP_084297617.1	CDS	COORDINATES: similar to AA sequence:RefSeq:WP_017802770.1
NZ_CP025085.1	intergenic	751550	751589		intergenic_NZ_CP025085.1-nt00751550											SorTnSeq	+	intergenic_NZ_CP025085.1-nt00751550
NZ_CP025085.1	gene	751590	752315	IclR family transcriptional regulator	gene-CWC46_RS03465	0.145171	1	1	-0.488755	0.486852	0.930301	7.11819	0.13853	0.737557	1	RefSeq	+	CWC46_RS03465	CWC46_RS03465				Gene				CWC46_03465	Protein Homology	CDS	Genbank:WP_021013583.1	CDS	COORDINATES: similar to AA sequence:RefSeq:WP_019450225.1
NZ_CP025085.1	intergenic	752316	752359		intergenic_NZ_CP025085.1-nt00752316											SorTnSeq	+	intergenic_NZ_CP025085.1-nt00752316
NZ_CP025085.1	gene	752360	752809	NUDIX domain-containing protein	gene-CWC46_RS03470	-0.0044014	1	1	-0.838825	0.480683	0.922363	6.39692	-0.0438247	1	1	RefSeq	-	CWC46_RS03470	CWC46_RS03470				Gene				CWC46_03470	Protein Homology	CDS	Genbank:WP_021013582.1	CDS	COORDINATES: similar to AA sequence:RefSeq:WP_015855460.1
NZ_CP025085.1	intergenic	752810	753033		intergenic_NZ_CP025085.1-nt00752810											SorTnSeq	+	intergenic_NZ_CP025085.1-nt00752810
NZ_CP025085.1	gene	753034	753501	Pr2TM family membrane protein	gene-CWC46_RS03475	-1.76587	0.226563	0.835947	-4.72755	0.0390627	0.438943	5.96879	-0.177674	0.855536	1	RefSeq	+	CWC46_RS03475	CWC46_RS03475				Gene				CWC46_03475	Protein Homology	CDS	Genbank:WP_021013581.1	CDS	COORDINATES: similar to AA sequence:RefSeq:WP_019846429.1
NZ_CP025085.1	intergenic	753502	753640		intergenic_NZ_CP025085.1-nt00753502											SorTnSeq	+	intergenic_NZ_CP025085.1-nt00753502
NZ_CP025085.1	gene	753641	754543	CDF family cation-efflux transporter FieF	gene-CWC46_RS03480	-0.415058	0.511846	1	-0.668453	0.237051	0.745168	7.655	-0.136927	0.597491	1	RefSeq	+	fieF	CWC46_RS03480				Gene	fieF			CWC46_03480	Protein Homology	CDS	Genbank:WP_021013580.1	CDS	COORDINATES: similar to AA sequence:RefSeq:WP_019846430.1	FieF%2C a metal efflux transporter%2C is a member of the CDF (cation diffusion facilitator) family of transporters.
NZ_CP025085.1	intergenic	754544	754761		intergenic_NZ_CP025085.1-nt00754544											SorTnSeq	+	intergenic_NZ_CP025085.1-nt00754544
NZ_CP025085.1	gene	754762	755724	6-phosphofructokinase	gene-CWC46_RS03485											RefSeq	+	pfkA	CWC46_RS03485				Gene	pfkA			CWC46_03485	Protein Homology	CDS	Genbank:WP_021013579.1	CDS	COORDINATES: similar to AA sequence:RefSeq:WP_014072359.1
NZ_CP025085.1	intergenic	755725	756138		intergenic_NZ_CP025085.1-nt00755725	-0.162921	1	1	0.660128	1	1	5.83137	0.103502	1	1	SorTnSeq	+	intergenic_NZ_CP025085.1-nt00755725
NZ_CP025085.1	gene	756139	757023	N-carbamoylputrescine amidase	gene-CWC46_RS03490	0.117914	1	1	-0.972575	0.359285	0.847909	6.45426	-0.179062	0.760793	1	RefSeq	+	aguB	CWC46_RS03490				Gene	aguB			CWC46_03490	Protein Homology	CDS	Genbank:WP_021013578.1	CDS	COORDINATES: similar to AA sequence:RefSeq:WP_005192514.1
NZ_CP025085.1	intergenic	757024	757026		intergenic_NZ_CP025085.1-nt00757024											SorTnSeq	+	intergenic_NZ_CP025085.1-nt00757024
NZ_CP025085.1	gene	757027	758124	agmatine deiminase	gene-CWC46_RS03495	0.468939	0.67764	1	-2.28336	0.0573735	0.506895	6.59683	0.532554	0.211612	1	RefSeq	+	aguA	CWC46_RS03495				Gene	aguA			CWC46_03495	Protein Homology	CDS	Genbank:WP_021013577.1	CDS	COORDINATES: similar to AA sequence:RefSeq:WP_015848309.1
NZ_CP025085.1	intergenic	758125	758496		intergenic_NZ_CP025085.1-nt00758125	-0.00421695	1	1	0.422546	1	1	5.7421	0.134201	1	1	SorTnSeq	+	intergenic_NZ_CP025085.1-nt00758125
NZ_CP025085.1	gene	758497	759264	triose-phosphate isomerase	gene-CWC46_RS03500											RefSeq	-	tpiA	CWC46_RS03500				Gene	tpiA			CWC46_03500	Protein Homology	CDS	Genbank:WP_021013576.1	CDS	COORDINATES: similar to AA sequence:RefSeq:WP_013315885.1
NZ_CP025085.1	intergenic	759265	759391		intergenic_NZ_CP025085.1-nt00759265											SorTnSeq	+	intergenic_NZ_CP025085.1-nt00759265
NZ_CP025085.1	gene	759392	759985	YiiQ family protein	gene-CWC46_RS03505	-0.00445048	1	1	-0.133158	0.720101	1	6.95566	0.0270491	1	1	RefSeq	-	CWC46_RS03505	CWC46_RS03505				Gene				CWC46_03505	Protein Homology	CDS	Genbank:WP_021013575.1	CDS	COORDINATES: similar to AA sequence:RefSeq:WP_020477062.1
NZ_CP025085.1	intergenic	759986	760156		intergenic_NZ_CP025085.1-nt00759986	-0.953022	0.581055	1	-1.9717	0.145997	0.636147	6.14163	0.0644342	1	1	SorTnSeq	+	intergenic_NZ_CP025085.1-nt00759986
NZ_CP025085.1	gene	760157	760579	DUF805 domain-containing protein	gene-CWC46_RS03510	-3.84215	0.125	0.716354	-0.126007	1	1	5.67933	0.266668	1	1	RefSeq	+	CWC46_RS03510	CWC46_RS03510				Gene				CWC46_03510	Protein Homology	CDS	Genbank:WP_021013574.1	CDS	COORDINATES: similar to AA sequence:RefSeq:WP_013315887.1
NZ_CP025085.1	intergenic	760580	760623		intergenic_NZ_CP025085.1-nt00760580											SorTnSeq	+	intergenic_NZ_CP025085.1-nt00760580
NZ_CP025085.1	gene	760624	761370	ferredoxin--NADP(+) reductase	gene-CWC46_RS03515	-2.01963	0.145997	0.738339	0.015766	1	1	6.31673	0.105414	0.87463	1	RefSeq	-	fpr	CWC46_RS03515				Gene	fpr			CWC46_03515	Protein Homology	CDS	Genbank:WP_021013573.1	CDS	COORDINATES: similar to AA sequence:RefSeq:WP_004931107.1
NZ_CP025085.1	intergenic	761371	761512		intergenic_NZ_CP025085.1-nt00761371	-4.00085	0.21875	0.835947	-0.284908	1	1	5.80217	0.440574	0.67764	1	SorTnSeq	+	intergenic_NZ_CP025085.1-nt00761371
NZ_CP025085.1	gene	761513	762523	class II fructose-bisphosphatase	gene-CWC46_RS03520	-0.575297	0.557198	1	-2.85451	0.00257689	0.130969	6.77233	0.0800132	0.902159	1	RefSeq	-	glpX	CWC46_RS03520				Gene	glpX			CWC46_03520	Protein Homology	CDS	Genbank:WP_021013572.1	CDS	COORDINATES: similar to AA sequence:RefSeq:WP_015379418.1
NZ_CP025085.1	intergenic	762524	762645		intergenic_NZ_CP025085.1-nt00762524											SorTnSeq	+	intergenic_NZ_CP025085.1-nt00762524
NZ_CP025085.1	gene	762646	764157	glycerol kinase GlpK	gene-CWC46_RS03525	0.283214	1	1	-0.239369	1	1	6.25357	0.627327	0.242987	1	RefSeq	-	glpK	CWC46_RS03525				Gene	glpK			CWC46_03525	Protein Homology	CDS	Genbank:WP_021013571.1	CDS	COORDINATES: similar to AA sequence:RefSeq:WP_012886543.1
NZ_CP025085.1	intergenic	764158	764187		intergenic_NZ_CP025085.1-nt00764158											SorTnSeq	+	intergenic_NZ_CP025085.1-nt00764158
NZ_CP025085.1	gene	764188	765033	aquaporin family protein	gene-CWC46_RS03530											RefSeq	-	CWC46_RS03530	CWC46_RS03530				Gene				CWC46_03530	Protein Homology	CDS	Genbank:WP_021013570.1	CDS	COORDINATES: similar to AA sequence:RefSeq:NP_312879.1
NZ_CP025085.1	intergenic	765034	765547		intergenic_NZ_CP025085.1-nt00765034	0.272793	1	1	0.144554	1	1	6.67935	0.150132	0.779769	1	SorTnSeq	+	intergenic_NZ_CP025085.1-nt00765034
NZ_CP025085.1	gene	765548	765790	cell division protein ZapB	gene-CWC46_RS03535											RefSeq	+	zapB	CWC46_RS03535				Gene	zapB			CWC46_03535	Protein Homology	CDS	Genbank:WP_021013569.1	CDS	COORDINATES: similar to AA sequence:RefSeq:WP_010847666.1
NZ_CP025085.1	intergenic	765791	765854		intergenic_NZ_CP025085.1-nt00765791											SorTnSeq	+	intergenic_NZ_CP025085.1-nt00765791
NZ_CP025085.1	gene	765855	766340	ribonuclease E activity regulator RraA	gene-CWC46_RS03540	0.0852697	1	1	-0.437466	0.790528	1	6.07015	-0.378391	0.57159	1	RefSeq	-	rraA	CWC46_RS03540				Gene	rraA			CWC46_03540	Protein Homology	CDS	Genbank:WP_021013568.1	CDS	COORDINATES: similar to AA sequence:RefSeq:NP_462970.1
NZ_CP025085.1	intergenic	766341	766470		intergenic_NZ_CP025085.1-nt00766341											SorTnSeq	+	intergenic_NZ_CP025085.1-nt00766341
NZ_CP025085.1	gene	766471	767388	1%2C4-dihydroxy-2-naphthoate polyprenyltransferase	gene-CWC46_RS03545	-0.00440162	1	1	0.3408	0.67764	1	6.71102	0.656649	0.104792	1	RefSeq	-	CWC46_RS03545	CWC46_RS03545				Gene				CWC46_03545	Protein Homology	CDS	Genbank:WP_021013567.1	CDS	COORDINATES: similar to AA sequence:RefSeq:WP_014917000.1
NZ_CP025085.1	intergenic	767389	767496		intergenic_NZ_CP025085.1-nt00767389											SorTnSeq	+	intergenic_NZ_CP025085.1-nt00767389
NZ_CP025085.1	gene	767497	768828	HslU--HslV peptidase ATPase subunit	gene-CWC46_RS03550											RefSeq	-	hslU	CWC46_RS03550				Gene	hslU			CWC46_03550	Protein Homology	CDS	Genbank:WP_021013566.1	CDS	COORDINATES: similar to AA sequence:RefSeq:WP_019841241.1
NZ_CP025085.1	intergenic	768829	768837		intergenic_NZ_CP025085.1-nt00768829											SorTnSeq	+	intergenic_NZ_CP025085.1-nt00768829
NZ_CP025085.1	gene	768838	769368	ATP-dependent protease subunit HslV	gene-CWC46_RS03555	-0.728354	1	1	-0.843395	0.6875	1	5.71102	0.683892	0.359285	1	RefSeq	-	hslV	CWC46_RS03555				Gene	hslV			CWC46_03555	Protein Homology	CDS	Genbank:WP_021013565.1	CDS	COORDINATES: similar to AA sequence:RefSeq:NP_312886.1
NZ_CP025085.1	intergenic	769369	769456		intergenic_NZ_CP025085.1-nt00769369											SorTnSeq	+	intergenic_NZ_CP025085.1-nt00769369
NZ_CP025085.1	gene	769457	770275	cell division protein FtsN	gene-CWC46_RS03560	-0.114504	1	1	-1.6839	0.179688	0.683602	6.09434	0.356858	0.596616	1	RefSeq	-	ftsN	CWC46_RS03560				Gene	ftsN			CWC46_03560	Protein Homology	CDS	Genbank:WP_071790834.1	CDS	COORDINATES: similar to AA sequence:RefSeq:WP_005175851.1
NZ_CP025085.1	intergenic	770276	770355		intergenic_NZ_CP025085.1-nt00770276											SorTnSeq	+	intergenic_NZ_CP025085.1-nt00770276
NZ_CP025085.1	gene	770356	771399	DNA-binding transcriptional regulator CytR	gene-CWC46_RS03565	-0.128386	1	1	-0.542664	0.222055	0.726294	7.41626	0.0902678	0.845372	1	RefSeq	-	cytR	CWC46_RS03565				Gene	cytR			CWC46_03565	Protein Homology	CDS	Genbank:WP_037380414.1	CDS	COORDINATES: similar to AA sequence:RefSeq:WP_011095728.1
NZ_CP025085.1	intergenic	771400	771671		intergenic_NZ_CP025085.1-nt00771400											SorTnSeq	+	intergenic_NZ_CP025085.1-nt00771400
NZ_CP025085.1	gene	771672	773867	primosomal protein N'	gene-CWC46_RS03570											RefSeq	-	priA	CWC46_RS03570				Gene	priA			CWC46_03570	Protein Homology	CDS	Genbank:WP_021013562.1	CDS	COORDINATES: similar to AA sequence:RefSeq:WP_005175847.1
NZ_CP025085.1	intergenic	773868	774133		intergenic_NZ_CP025085.1-nt00773868	-0.9067	0.6875	1	-3.86754	0.125	0.608972	5.64689	0.266667	1	1	SorTnSeq	+	intergenic_NZ_CP025085.1-nt00773868
NZ_CP025085.1	gene	774134	774349	50S ribosomal protein L31	gene-CWC46_RS03575											RefSeq	+	rpmE	CWC46_RS03575				Gene	rpmE			CWC46_03575	Protein Homology	CDS	Genbank:WP_021013561.1	CDS	COORDINATES: similar to AA sequence:RefSeq:WP_013315900.1
NZ_CP025085.1	intergenic	774350	774438		intergenic_NZ_CP025085.1-nt00774350											SorTnSeq	+	intergenic_NZ_CP025085.1-nt00774350
NZ_CP025085.1	gene	774439	774756	met regulon transcriptional regulator MetJ	gene-CWC46_RS03580											RefSeq	-	metJ	CWC46_RS03580				Gene	metJ			CWC46_03580	Protein Homology	CDS	Genbank:WP_021013560.1	CDS	COORDINATES: similar to AA sequence:RefSeq:WP_015855437.1
NZ_CP025085.1	intergenic	774757	774942		intergenic_NZ_CP025085.1-nt00774757											SorTnSeq	+	intergenic_NZ_CP025085.1-nt00774757
NZ_CP025085.1	gene	774943	776103	cystathionine gamma-synthase	gene-CWC46_RS03585	-0.198607	0.783848	1	-0.736834	0.252873	0.765917	7.56241	0.0804249	0.784331	1	RefSeq	+	metB	CWC46_RS03585				Gene	metB			CWC46_03585	Protein Homology	CDS	Genbank:WP_021013559.1	CDS	COORDINATES: similar to AA sequence:RefSeq:WP_019846445.1
NZ_CP025085.1	intergenic	776104	776105		intergenic_NZ_CP025085.1-nt00776104											SorTnSeq	+	intergenic_NZ_CP025085.1-nt00776104
NZ_CP025085.1	gene	776106	778541	bifunctional aspartate kinase/homoserine dehydrogenase II	gene-CWC46_RS03590	-0.00450732	1	1	-0.1934	0.617304	0.992491	8.3219	-0.0708246	0.781083	1	RefSeq	+	CWC46_RS03590	CWC46_RS03590				Gene				CWC46_03590	Protein Homology	CDS	Genbank:WP_021013558.1	CDS	COORDINATES: similar to AA sequence:RefSeq:WP_012767904.1
NZ_CP025085.1	intergenic	778542	778814		intergenic_NZ_CP025085.1-nt00778542	-4.39318	0.125	0.716354	0.267395	0.790528	1	5.85992	-0.297919	0.67764	1	SorTnSeq	+	intergenic_NZ_CP025085.1-nt00778542
NZ_CP025085.1	gene	778815	779708	methylenetetrahydrofolate reductase	gene-CWC46_RS03595	-0.0480399	1	1	-0.0100141	1	1	7.03299	0.129728	0.72755	1	RefSeq	+	metF	CWC46_RS03595				Gene	metF			CWC46_03595	Protein Homology	CDS	Genbank:WP_021013557.1	CDS	COORDINATES: similar to AA sequence:RefSeq:WP_012767908.1
NZ_CP025085.1	intergenic	779709	779786		intergenic_NZ_CP025085.1-nt00779709											SorTnSeq	+	intergenic_NZ_CP025085.1-nt00779709
NZ_CP025085.1	pseudogene	779787	780519	redoxin family protein	gene-CWC46_RS03600	-0.872502	0.136047	0.738339	-0.339086	0.73588	1	7.11813	0.191696	0.585651	1	RefSeq	-	CWC46_RS03600	CWC46_RS03600			pseudo	Gene				CWC46_03600	Protein Homology	CDS		CDS	COORDINATES: similar to AA sequence:RefSeq:WP_019452251.1	frameshifted%3B internal stop
NZ_CP025085.1	intergenic	780520	780679		intergenic_NZ_CP025085.1-nt00780520	-0.52481	1	1	-3.48508	0.25	0.761797	5.5094	0.383275	0.607239	1	SorTnSeq	+	intergenic_NZ_CP025085.1-nt00780520
NZ_CP025085.1	gene	780680	781597	DNA-binding transcriptional regulator OxyR	gene-CWC46_RS03605											RefSeq	+	oxyR	CWC46_RS03605				Gene	oxyR			CWC46_03605	Protein Homology	CDS	Genbank:WP_021013556.1	CDS	COORDINATES: similar to AA sequence:RefSeq:WP_012439909.1
NZ_CP025085.1	gene	781580	782989	Si-specific NAD(P)(+) transhydrogenase	gene-CWC46_RS03610	-0.667102	0.0869513	0.694008	0.192908	0.648794	1	8.03909	0.387342	0.109064	1	RefSeq	-	sthA	CWC46_RS03610				Gene	sthA			CWC46_03610	Protein Homology	CDS	Genbank:WP_021013555.1	CDS	COORDINATES: similar to AA sequence:RefSeq:WP_010308160.1
NZ_CP025085.1	intergenic	782990	783173		intergenic_NZ_CP025085.1-nt00782990	0.928607	0.726563	1	-0.639527	1	1	5.47293	-0.416581	1	1	SorTnSeq	+	intergenic_NZ_CP025085.1-nt00782990
NZ_CP025085.1	gene	783174	783815	HTH-type transcriptional repressor FabR	gene-CWC46_RS03615	0.109625	1	1	-0.393207	0.65874	1	7.40666	-0.0120962	1	1	RefSeq	+	fabR	CWC46_RS03615				Gene	fabR			CWC46_03615	Protein Homology	CDS	Genbank:WP_021013554.1	CDS	COORDINATES: similar to AA sequence:RefSeq:WP_011095712.1
NZ_CP025085.1	intergenic	783816	783839		intergenic_NZ_CP025085.1-nt00783816											SorTnSeq	+	intergenic_NZ_CP025085.1-nt00783816
NZ_CP025085.1	gene	783840	784211	YijD family membrane protein	gene-CWC46_RS03620	-1.76587	0.109375	0.716354	-0.437465	0.790528	1	6.23182	0.425948	0.417695	1	RefSeq	+	CWC46_RS03620	CWC46_RS03620				Gene				CWC46_03620	Protein Homology	CDS	Genbank:WP_021013553.1	CDS	COORDINATES: similar to AA sequence:RefSeq:WP_015855430.1
NZ_CP025085.1	intergenic	784212	784272		intergenic_NZ_CP025085.1-nt00784212											SorTnSeq	+	intergenic_NZ_CP025085.1-nt00784212
NZ_CP025085.1	gene	784273	785376	tRNA (uridine(54)-C5)-methyltransferase TrmA	gene-CWC46_RS03625	-1.22181	0.0614293	0.642244	0.0746526	1	1	7.08226	-0.0373705	1	1	RefSeq	-	trmA	CWC46_RS03625				Gene	trmA			CWC46_03625	Protein Homology	CDS	Genbank:WP_021013552.1	CDS	COORDINATES: similar to AA sequence:RefSeq:WP_008815813.1
NZ_CP025085.1	intergenic	785377	785510		intergenic_NZ_CP025085.1-nt00785377											SorTnSeq	+	intergenic_NZ_CP025085.1-nt00785377
NZ_CP025085.1	riboswitch	785511	785711		id-NZ_CP025085.1:785511..785711	-0.162921	1	1	-1.18089	0.453125	0.907018	5.94234	0.79424	0.24779	1	cmsearch	+		riboswitch	adenosylcobalamin	RFAM:RF00174	riboswitch	regulatory			cobalamin riboswitch
NZ_CP025085.1	intergenic	785712	785779		intergenic_NZ_CP025085.1-nt00785712											SorTnSeq	+	intergenic_NZ_CP025085.1-nt00785712
NZ_CP025085.1	gene	785780	787651	TonB-dependent vitamin B12 receptor BtuB	gene-CWC46_RS03630	-0.733569	0.0617125	0.642244	-0.487996	0.123433	0.608972	8.70681	0.119858	0.484841	1	RefSeq	+	btuB	CWC46_RS03630				Gene	btuB			CWC46_03630	Protein Homology	CDS	Genbank:WP_021013551.1	CDS	COORDINATES: similar to AA sequence:RefSeq:WP_013814979.1
NZ_CP025085.1	gene	787596	788456	glutamate racemase	gene-CWC46_RS03635	0.729832	0.00440396	0.216402	0.104832	0.79996	1	8.81717	-0.0365811	0.904382	1	RefSeq	+	murI	CWC46_RS03635				Gene	murI			CWC46_03635	Protein Homology	CDS	Genbank:WP_021013550.1	CDS	COORDINATES: similar to AA sequence:RefSeq:WP_010308144.1
NZ_CP025085.1	intergenic	788457	788825		intergenic_NZ_CP025085.1-nt00788457											SorTnSeq	+	intergenic_NZ_CP025085.1-nt00788457
NZ_CP025085.1	gene	788826	790375	16S ribosomal RNA	gene-CWC46_RS03645											RefSeq	+	CWC46_RS03645	CWC46_RS03645				Gene				CWC46_03645	RefSeq	rRNA		rRNA
NZ_CP025085.1	intergenic	790376	790437		intergenic_NZ_CP025085.1-nt00790376											SorTnSeq	+	intergenic_NZ_CP025085.1-nt00790376
NZ_CP025085.1	gene	790438	790514	tRNA-Ile	gene-CWC46_RS03650											RefSeq	+	CWC46_RS03650	CWC46_RS03650				Gene				CWC46_03650	tRNAscan-SE	tRNA		tRNA	COORDINATES: profile:tRNAscan-SE:2.0.4
NZ_CP025085.1	intergenic	790515	790614		intergenic_NZ_CP025085.1-nt00790515											SorTnSeq	+	intergenic_NZ_CP025085.1-nt00790515
NZ_CP025085.1	gene	790615	790690	tRNA-Ala	gene-CWC46_RS03655											RefSeq	+	CWC46_RS03655	CWC46_RS03655				Gene				CWC46_03655	tRNAscan-SE	tRNA		tRNA	COORDINATES: profile:tRNAscan-SE:2.0.4
NZ_CP025085.1	intergenic	790691	790880		intergenic_NZ_CP025085.1-nt00790691											SorTnSeq	+	intergenic_NZ_CP025085.1-nt00790691
NZ_CP025085.1	gene	790881	793917	23S ribosomal RNA	gene-CWC46_RS03660											RefSeq	+	CWC46_RS03660	CWC46_RS03660				Gene				CWC46_03660	RefSeq	rRNA		rRNA
NZ_CP025085.1	intergenic	793918	794010		intergenic_NZ_CP025085.1-nt00793918											SorTnSeq	+	intergenic_NZ_CP025085.1-nt00793918
NZ_CP025085.1	gene	794011	794126	5S ribosomal RNA	gene-CWC46_RS03665											RefSeq	+	rrf	CWC46_RS03665				Gene	rrf			CWC46_03665	cmsearch	rRNA	RFAM:RF00001	rRNA	COORDINATES: profile:INFERNAL:1.1.1
NZ_CP025085.1	intergenic	794127	794247		intergenic_NZ_CP025085.1-nt00794127											SorTnSeq	+	intergenic_NZ_CP025085.1-nt00794127
NZ_CP025085.1	gene	794248	794324	tRNA-Asp	gene-CWC46_RS03670											RefSeq	+	CWC46_RS03670	CWC46_RS03670				Gene				CWC46_03670	tRNAscan-SE	tRNA		tRNA	COORDINATES: profile:tRNAscan-SE:2.0.4
NZ_CP025085.1	intergenic	794325	794332		intergenic_NZ_CP025085.1-nt00794325											SorTnSeq	+	intergenic_NZ_CP025085.1-nt00794325
NZ_CP025085.1	gene	794333	794408	tRNA-Trp	gene-CWC46_RS03675											RefSeq	+	CWC46_RS03675	CWC46_RS03675				Gene				CWC46_03675	tRNAscan-SE	tRNA		tRNA	COORDINATES: profile:tRNAscan-SE:2.0.4
NZ_CP025085.1	intergenic	794409	794840		intergenic_NZ_CP025085.1-nt00794409	0.283214	0.790528	1	0.157114	1	1	6.16479	0.280502	0.720101	1	SorTnSeq	+	intergenic_NZ_CP025085.1-nt00794409
NZ_CP025085.1	gene	794841	795797	ABC transporter substrate-binding protein	gene-CWC46_RS03680	-0.260709	0.525777	1	-0.292078	0.532312	0.95456	7.83127	0.0733537	0.804024	1	RefSeq	+	CWC46_RS03680	CWC46_RS03680				Gene				CWC46_03680	Protein Homology	CDS	Genbank:WP_021013549.1	CDS	COORDINATES: similar to AA sequence:RefSeq:NP_313232.1
NZ_CP025085.1	intergenic	795798	795881		intergenic_NZ_CP025085.1-nt00795798	-1.33843	0.507813	1	-1.45421	0.289063	0.782459	5.88789	0.257828	0.84502	1	SorTnSeq	+	intergenic_NZ_CP025085.1-nt00795798
NZ_CP025085.1	gene	795882	797396	sugar ABC transporter ATP-binding protein	gene-CWC46_RS03685	0.403631	0.0428407	0.575437	-0.14136	0.563001	0.963914	9.58852	-0.012832	0.964619	1	RefSeq	+	CWC46_RS03685	CWC46_RS03685				Gene				CWC46_03685	Protein Homology	CDS	Genbank:WP_021013548.1	CDS	COORDINATES: similar to AA sequence:RefSeq:WP_017894399.1
NZ_CP025085.1	gene	797389	798399	ABC transporter permease	gene-CWC46_RS03690	-0.454231	0.584666	1	0.618298	0.211026	0.718687	6.92902	-0.315849	0.449966	1	RefSeq	+	CWC46_RS03690	CWC46_RS03690				Gene				CWC46_03690	Protein Homology	CDS	Genbank:WP_021013547.1	CDS	COORDINATES: similar to AA sequence:RefSeq:WP_011095705.1
NZ_CP025085.1	gene	798399	799361	sugar ABC transporter permease YjfF	gene-CWC46_RS03695	0.376705	0.410106	0.974389	-1.14435	0.080692	0.563725	7.41628	-0.0153487	1	1	RefSeq	+	yjfF	CWC46_RS03695				Gene	yjfF			CWC46_03695	Protein Homology	CDS	Genbank:WP_021013546.1	CDS	COORDINATES: similar to AA sequence:RefSeq:WP_009637889.1
NZ_CP025085.1	intergenic	799362	799380		intergenic_NZ_CP025085.1-nt00799362	0.928607	0.726563	1	0.256454	1	1	5.47294	-0.71212	0.753907	1	SorTnSeq	+	intergenic_NZ_CP025085.1-nt00799362
NZ_CP025085.1	gene	799381	800208	HTH-type transcriptional regulator HdfR	gene-CWC46_RS03700	0.0232091	1	1	0.189799	0.787708	1	7.53625	0.0279168	1	1	RefSeq	-	hdfR	CWC46_RS03700				Gene	hdfR			CWC46_03700	Protein Homology	CDS	Genbank:WP_021013545.1	CDS	COORDINATES: similar to AA sequence:RefSeq:WP_012767917.1
NZ_CP025085.1	intergenic	800209	800328		intergenic_NZ_CP025085.1-nt00800209	-0.555253	0.753907	1	1.23911	0.16707	0.676331	6.02045	-0.297919	0.67764	1	SorTnSeq	+	intergenic_NZ_CP025085.1-nt00800209
NZ_CP025085.1	gene	800329	800667	DUF413 domain-containing protein	gene-CWC46_RS03705	-0.713555	0.62906	1	0.696117	0.326941	0.823402	6.397	-0.327637	0.627104	1	RefSeq	+	CWC46_RS03705	CWC46_RS03705				Gene				CWC46_03705	Protein Homology	CDS	Genbank:WP_021013544.1	CDS	COORDINATES: similar to AA sequence:RefSeq:YP_005224411.1
NZ_CP025085.1	intergenic	800668	800728		intergenic_NZ_CP025085.1-nt00800668											SorTnSeq	+	intergenic_NZ_CP025085.1-nt00800668
NZ_CP025085.1	gene	800729	802255	YifB family Mg chelatase-like AAA ATPase	gene-CWC46_RS03710	-0.543193	0.305681	0.900935	-0.262583	0.716303	1	7.83126	-0.0258588	1	1	RefSeq	-	CWC46_RS03710	CWC46_RS03710				Gene				CWC46_03710	Protein Homology	CDS	Genbank:WP_021013543.1	CDS	COORDINATES: similar to AA sequence:RefSeq:WP_015699155.1
NZ_CP025085.1	intergenic	802256	802607		intergenic_NZ_CP025085.1-nt00802256	-4.50271	0.0714861	0.646455	-0.785644	0.551229	0.954912	5.85989	-0.286543	0.693953	1	SorTnSeq	+	intergenic_NZ_CP025085.1-nt00802256
NZ_CP025085.1	gene	802608	803831	MFS transporter	gene-CWC46_RS03715	-1.04491	0.117277	0.716354	-0.451401	0.560067	0.960197	7.32695	-0.15241	0.69083	1	RefSeq	+	CWC46_RS03715	CWC46_RS03715				Gene				CWC46_03715	Protein Homology	CDS	Genbank:WP_021013542.1	CDS	COORDINATES: similar to AA sequence:RefSeq:WP_012767920.1
NZ_CP025085.1	intergenic	803832	803963		intergenic_NZ_CP025085.1-nt00803832											SorTnSeq	+	intergenic_NZ_CP025085.1-nt00803832
NZ_CP025085.1	gene	803964	804062	ilv operon leader peptide	gene-CWC46_RS03720											RefSeq	+	ilvL	CWC46_RS03720				Gene	ilvL			CWC46_03720	Protein Homology	CDS	Genbank:WP_071790830.1	CDS	COORDINATES: similar to AA sequence:RefSeq:NP_312728.1
NZ_CP025085.1	intergenic	804063	804201		intergenic_NZ_CP025085.1-nt00804063											SorTnSeq	+	intergenic_NZ_CP025085.1-nt00804063
NZ_CP025085.1	gene	804202	805869	acetolactate synthase 2 catalytic subunit	gene-CWC46_RS03725	-0.405798	0.380005	0.948327	-0.714628	0.0711663	0.537428	8.0882	-0.134256	0.552217	1	RefSeq	+	CWC46_RS03725	CWC46_RS03725				Gene				CWC46_03725	Protein Homology	CDS	Genbank:WP_021013541.1	CDS	COORDINATES: similar to AA sequence:RefSeq:WP_019845882.1
NZ_CP025085.1	gene	805866	806123	acetolactate synthase 2 small subunit	gene-CWC46_RS03730	-0.00436947	1	1	-1.07572	0.581055	0.971935	6.3372	0.45323	0.348891	1	RefSeq	+	ilvM	CWC46_RS03730				Gene	ilvM			CWC46_03730	Protein Homology	CDS	Genbank:WP_021013540.1	CDS	COORDINATES: similar to AA sequence:RefSeq:WP_017800629.1
NZ_CP025085.1	intergenic	806124	806147		intergenic_NZ_CP025085.1-nt00806124											SorTnSeq	+	intergenic_NZ_CP025085.1-nt00806124
NZ_CP025085.1	gene	806148	807074	branched-chain amino acid transaminase	gene-CWC46_RS03735	-0.603232	0.207372	0.835947	-0.00359242	1	1	7.86693	-0.123388	0.623201	1	RefSeq	+	CWC46_RS03735	CWC46_RS03735				Gene				CWC46_03735	Protein Homology	CDS	Genbank:WP_021013539.1	CDS	COORDINATES: similar to AA sequence:RefSeq:WP_010294671.1
NZ_CP025085.1	intergenic	807075	807148		intergenic_NZ_CP025085.1-nt00807075											SorTnSeq	+	intergenic_NZ_CP025085.1-nt00807075
NZ_CP025085.1	gene	807149	808999	dihydroxy-acid dehydratase	gene-CWC46_RS03740	-0.376462	0.422196	0.975577	-0.0509642	1	1	8.16467	0.183589	0.382796	1	RefSeq	+	ilvD	CWC46_RS03740				Gene	ilvD			CWC46_03740	Protein Homology	CDS	Genbank:WP_021013538.1	CDS	COORDINATES: similar to AA sequence:RefSeq:WP_005133366.1
NZ_CP025085.1	intergenic	809000	809002		intergenic_NZ_CP025085.1-nt00809000											SorTnSeq	+	intergenic_NZ_CP025085.1-nt00809000
NZ_CP025085.1	gene	809003	810547	threonine ammonia-lyase%2C biosynthetic	gene-CWC46_RS03745	-0.633423	0.252873	0.863539	-0.477686	0.331753	0.824141	7.57108	0.0761586	0.856987	1	RefSeq	+	ilvA	CWC46_RS03745				Gene	ilvA			CWC46_03745	Protein Homology	CDS	Genbank:WP_021013537.1	CDS	COORDINATES: similar to AA sequence:RefSeq:WP_010294667.1
NZ_CP025085.1	intergenic	810548	810649		intergenic_NZ_CP025085.1-nt00810548	-3.6638	0.125	0.716354	-3.68895	0.125	0.608972	5.47286	0.0100331	1	1	SorTnSeq	+	intergenic_NZ_CP025085.1-nt00810548
NZ_CP025085.1	gene	810650	811390	DUF2461 domain-containing protein	gene-CWC46_RS03750	-0.138082	1	1	-0.576093	0.663625	1	6.47288	-0.116049	0.880397	1	RefSeq	+	CWC46_RS03750	CWC46_RS03750				Gene				CWC46_03750	Protein Homology	CDS	Genbank:WP_021013536.1	CDS	COORDINATES: similar to AA sequence:RefSeq:WP_010294665.1
NZ_CP025085.1	intergenic	811391	811496		intergenic_NZ_CP025085.1-nt00811391											SorTnSeq	+	intergenic_NZ_CP025085.1-nt00811391
NZ_CP025085.1	gene	811497	812384	HTH-type transcriptional activator IlvY	gene-CWC46_RS03755	-0.223471	0.87463	1	-1.49097	0.0350828	0.427115	7.20973	0.0972107	0.917042	1	RefSeq	-	ilvY	CWC46_RS03755				Gene	ilvY			CWC46_03755	Protein Homology	CDS	Genbank:WP_021013535.1	CDS	COORDINATES: similar to AA sequence:RefSeq:WP_012767928.1
NZ_CP025085.1	intergenic	812385	812550		intergenic_NZ_CP025085.1-nt00812385											SorTnSeq	+	intergenic_NZ_CP025085.1-nt00812385
NZ_CP025085.1	gene	812551	814029	ketol-acid reductoisomerase	gene-CWC46_RS03760	-1.11881	0.0895325	0.694008	-0.991014	0.143309	0.636147	7.34719	0.355942	0.245898	1	RefSeq	+	ilvC	CWC46_RS03760				Gene	ilvC			CWC46_03760	Protein Homology	CDS	Genbank:WP_021013534.1	CDS	COORDINATES: similar to AA sequence:RefSeq:WP_005133363.1
NZ_CP025085.1	intergenic	814030	814103		intergenic_NZ_CP025085.1-nt00814030											SorTnSeq	+	intergenic_NZ_CP025085.1-nt00814030
NZ_CP025085.1	gene	814104	815588	sodium/proline symporter PutP	gene-CWC46_RS03765	-0.0677592	1	1	-0.332566	0.542386	0.954912	7.42583	0.199795	0.5584	1	RefSeq	-	putP	CWC46_RS03765				Gene	putP			CWC46_03765	Protein Homology	CDS	Genbank:WP_021013533.1	CDS	COORDINATES: similar to AA sequence:RefSeq:WP_005969117.1
NZ_CP025085.1	intergenic	815589	816050		intergenic_NZ_CP025085.1-nt00815589	-0.402087	0.790528	1	-0.527168	0.790528	1	6.27491	0.27189	0.742831	1	SorTnSeq	+	intergenic_NZ_CP025085.1-nt00815589
NZ_CP025085.1	gene	816051	820025	trifunctional transcriptional regulator/proline dehydrogenase/L-glutamate gamma-semialdehyde dehydrogenase	gene-CWC46_RS03770	-0.773376	0.0172384	0.409575	-0.447	0.125486	0.608972	8.849	-0.217231	0.199878	1	RefSeq	+	putA	CWC46_RS03770				Gene	putA			CWC46_03770	Protein Homology	CDS	Genbank:WP_021013532.1	CDS	COORDINATES: similar to AA sequence:RefSeq:WP_013813455.1
NZ_CP025085.1	intergenic	820026	820080		intergenic_NZ_CP025085.1-nt00820026											SorTnSeq	+	intergenic_NZ_CP025085.1-nt00820026
NZ_CP025085.1	gene	820081	820362	peptidylprolyl isomerase	gene-CWC46_RS03775	-0.43595	0.753907	1	-1.45421	0.507813	0.937974	5.57983	-1.54985	0.0768134	1	RefSeq	-	CWC46_RS03775	CWC46_RS03775				Gene				CWC46_03775	Protein Homology	CDS	Genbank:WP_037380398.1	CDS	COORDINATES: similar to AA sequence:RefSeq:WP_004721654.1	rotamase C%3B accelerates isomerization of the peptidyl prolyl bond
NZ_CP025085.1	intergenic	820363	820520		intergenic_NZ_CP025085.1-nt00820363	-0.56621	0.607239	1	-1.23995	0.179566	0.683602	6.20983	-0.178398	0.86794	1	SorTnSeq	+	intergenic_NZ_CP025085.1-nt00820363
NZ_CP025085.1	gene	820521	822545	DNA helicase Rep	gene-CWC46_RS03780											RefSeq	+	rep	CWC46_RS03780				Gene	rep			CWC46_03780	Protein Homology	CDS	Genbank:WP_021013530.1	CDS	COORDINATES: similar to AA sequence:RefSeq:WP_005969123.1
NZ_CP025085.1	intergenic	822546	822640		intergenic_NZ_CP025085.1-nt00822546											SorTnSeq	+	intergenic_NZ_CP025085.1-nt00822546
NZ_CP025085.1	gene	822641	824428	glycoside hydrolase family 28 protein	gene-CWC46_RS03785	-1.05685	0.0588003	0.642244	-0.496443	0.254428	0.767175	7.94214	0.450368	0.0570757	1	RefSeq	-	CWC46_RS03785	CWC46_RS03785				Gene				CWC46_03785	Protein Homology	CDS	Genbank:WP_021013529.1	CDS	COORDINATES: similar to AA sequence:RefSeq:WP_012767935.1
NZ_CP025085.1	intergenic	824429	824945		intergenic_NZ_CP025085.1-nt00824429	-0.969574	0.359285	0.934991	-0.698489	0.523468	0.947434	6.54498	-0.0120091	1	1	SorTnSeq	+	intergenic_NZ_CP025085.1-nt00824429
NZ_CP025085.1	gene	824946	826442	guanosine-5'-triphosphate%2C3'-diphosphate diphosphatase	gene-CWC46_RS03790	-0.363655	0.538586	1	-0.599128	0.214543	0.723946	7.88085	0.0400897	0.872443	1	RefSeq	-	gppA	CWC46_RS03790				Gene	gppA			CWC46_03790	Protein Homology	CDS	Genbank:WP_021013527.1	CDS	COORDINATES: similar to AA sequence:RefSeq:WP_010283887.1
NZ_CP025085.1	intergenic	826443	826449		intergenic_NZ_CP025085.1-nt00826443											SorTnSeq	+	intergenic_NZ_CP025085.1-nt00826443
NZ_CP025085.1	gene	826450	827742	ATP-dependent RNA helicase RhlB	gene-CWC46_RS03795	-0.224009	0.754219	1	-2.43659	0.00268087	0.133699	7.22073	0.174065	0.696092	1	RefSeq	-	rhlB	CWC46_RS03795				Gene	rhlB			CWC46_03795	Protein Homology	CDS	Genbank:WP_021013526.1	CDS	COORDINATES: similar to AA sequence:RefSeq:WP_004393131.1
NZ_CP025085.1	intergenic	827743	827861		intergenic_NZ_CP025085.1-nt00827743											SorTnSeq	+	intergenic_NZ_CP025085.1-nt00827743
NZ_CP025085.1	gene	827862	828188	thioredoxin TrxA	gene-CWC46_RS03800	-0.728354	1	1	-3.68895	0.125	0.608972	5.35741	-0.923066	0.548829	1	RefSeq	+	trxA	CWC46_RS03800				Gene	trxA			CWC46_03800	Protein Homology	CDS	Genbank:WP_021013525.1	CDS	COORDINATES: similar to AA sequence:RefSeq:WP_017375425.1
NZ_CP025085.1	intergenic	828189	828610		intergenic_NZ_CP025085.1-nt00828189											SorTnSeq	+	intergenic_NZ_CP025085.1-nt00828189
NZ_CP025085.1	gene	828611	829870	transcription termination factor Rho	gene-CWC46_RS03805											RefSeq	+	rho	CWC46_RS03805				Gene	rho			CWC46_03805	Protein Homology	CDS	Genbank:WP_037380347.1	CDS	COORDINATES: similar to AA sequence:RefSeq:YP_005224430.1
NZ_CP025085.1	intergenic	829871	830109		intergenic_NZ_CP025085.1-nt00829871	-0.768995	0.551229	1	0.0577876	1	1	6.31672	0.695448	0.208877	1	SorTnSeq	+	intergenic_NZ_CP025085.1-nt00829871
NZ_CP025085.1	gene	830110	831201	UDP-N-acetylglucosamine--undecaprenyl-phosphate N-acetylglucosaminephosphotransferase	gene-CWC46_RS03810	0.323387	0.823803	1	-0.0598311	1	1	6.54503	0.371276	0.461394	1	RefSeq	+	wecA	CWC46_RS03810				Gene	wecA			CWC46_03810	Protein Homology	CDS	Genbank:WP_071790829.1	CDS	COORDINATES: similar to AA sequence:RefSeq:WP_019080213.1
NZ_CP025085.1	intergenic	831202	831222		intergenic_NZ_CP025085.1-nt00831202											SorTnSeq	+	intergenic_NZ_CP025085.1-nt00831202
NZ_CP025085.1	gene	831223	832269	ECA polysaccharide chain length modulation protein	gene-CWC46_RS03815	-0.47778	0.690039	1	-0.349775	0.701109	1	6.90168	0.39849	0.281983	1	RefSeq	+	wzzE	CWC46_RS03815				Gene	wzzE			CWC46_03815	Protein Homology	CDS	Genbank:WP_021013522.1	CDS	COORDINATES: similar to AA sequence:RefSeq:WP_015842104.1
NZ_CP025085.1	intergenic	832270	832339		intergenic_NZ_CP025085.1-nt00832270	-1.33843	0.289063	0.895025	-0.558228	0.753907	1	5.77244	-0.308582	0.663625	1	SorTnSeq	+	intergenic_NZ_CP025085.1-nt00832270
NZ_CP025085.1	gene	832340	833470	UDP-N-acetylglucosamine 2-epimerase (non-hydrolyzing)	gene-CWC46_RS03820	-2.16784	0.0103353	0.339984	-0.209968	0.747657	1	6.94228	-0.298173	0.426945	1	RefSeq	+	wecB	CWC46_RS03820				Gene	wecB			CWC46_03820	Protein Homology	CDS	Genbank:WP_037380343.1	CDS	COORDINATES: similar to AA sequence:RefSeq:WP_009111028.1
NZ_CP025085.1	gene	833467	834729	UDP-N-acetyl-D-mannosamine dehydrogenase	gene-CWC46_RS03825	-0.769387	0.211026	0.835947	-1.11496	0.0335533	0.426788	7.3371	0.0653494	0.92195	1	RefSeq	+	wecC	CWC46_RS03825				Gene	wecC			CWC46_03825	Protein Homology	CDS	Genbank:WP_021013520.1	CDS	COORDINATES: similar to AA sequence:RefSeq:NP_312747.1
NZ_CP025085.1	intergenic	834730	834794		intergenic_NZ_CP025085.1-nt00834730											SorTnSeq	+	intergenic_NZ_CP025085.1-nt00834730
NZ_CP025085.1	gene	834795	835496	dTDP-4-amino-4%2C6-dideoxy-D-galactose acyltransferase	gene-CWC46_RS03830	0.067391	1	1	1.05282	0.0871597	0.587715	6.5626	0.152255	0.877615	1	RefSeq	+	rffC	CWC46_RS03830				Gene	rffC	wecD		CWC46_03830	Protein Homology	CDS	Genbank:WP_021013519.1	CDS	COORDINATES: similar to AA sequence:RefSeq:WP_019845865.1
NZ_CP025085.1	intergenic	835497	835500		intergenic_NZ_CP025085.1-nt00835497											SorTnSeq	+	intergenic_NZ_CP025085.1-nt00835497
NZ_CP025085.1	gene	835501	836631	dTDP-4-amino-4%2C6-dideoxygalactose transaminase	gene-CWC46_RS03835	-0.75254	0.45826	0.982097	-0.407657	0.473131	0.921564	7.0203	0.188038	0.648794	1	RefSeq	+	rffA	CWC46_RS03835				Gene	rffA	fcnA,wecE		CWC46_03835	Protein Homology	CDS	Genbank:WP_021013518.1	CDS	COORDINATES: similar to AA sequence:RefSeq:NP_462815.1
NZ_CP025085.1	intergenic	836632	836632		intergenic_NZ_CP025085.1-nt00836632											SorTnSeq	+	intergenic_NZ_CP025085.1-nt00836632
NZ_CP025085.1	gene	836633	837883	lipid III flippase WzxE	gene-CWC46_RS03840	-0.285081	0.742831	1	-0.819423	0.310507	0.802063	7.23176	0.311326	0.40693	1	RefSeq	+	wzxE	CWC46_RS03840				Gene	wzxE			CWC46_03840	Protein Homology	CDS	Genbank:WP_037380339.1	CDS	COORDINATES: similar to AA sequence:RefSeq:WP_014701797.1
NZ_CP025085.1	gene	837880	838965	TDP-N-acetylfucosamine:lipid II N-acetylfucosaminyltransferase	gene-CWC46_RS03845	-0.577616	0.596616	1	-0.705732	0.377088	0.868094	7.05776	0.138529	0.737557	1	RefSeq	+	CWC46_RS03845	CWC46_RS03845				Gene				CWC46_03845	Protein Homology	CDS	Genbank:WP_021013516.1	CDS	COORDINATES: similar to AA sequence:RefSeq:WP_010283870.1
NZ_CP025085.1	gene	838962	840335	O-antigen assembly polymerase	gene-CWC46_RS03850	-0.51646	0.349685	0.931447	-0.522154	0.289247	0.782459	7.63036	-0.158455	0.594622	1	RefSeq	+	wzyE	CWC46_RS03850				Gene	wzyE			CWC46_03850	Protein Homology	CDS	Genbank:WP_021013515.1	CDS	COORDINATES: similar to AA sequence:RefSeq:WP_015731404.1
NZ_CP025085.1	gene	840332	841084	lipopolysaccharide N-acetylmannosaminouronosyltransferase	gene-CWC46_RS03855	0.185791	0.761222	1	-0.519218	0.32478	0.820007	7.26428	0.0401872	0.916451	1	RefSeq	+	rffM	CWC46_RS03855				Gene	rffM			CWC46_03855	Protein Homology	CDS	Genbank:WP_021013514.1	CDS	COORDINATES: similar to AA sequence:RefSeq:WP_015731403.1
NZ_CP025085.1	intergenic	841085	841250		intergenic_NZ_CP025085.1-nt00841085											SorTnSeq	+	intergenic_NZ_CP025085.1-nt00841085
NZ_CP025085.1	gene	841251	841327	tRNA-Arg	gene-CWC46_RS03860											RefSeq	+	CWC46_RS03860	CWC46_RS03860				Gene				CWC46_03860	tRNAscan-SE	tRNA		tRNA	COORDINATES: profile:tRNAscan-SE:2.0.4
NZ_CP025085.1	intergenic	841328	841408		intergenic_NZ_CP025085.1-nt00841328											SorTnSeq	+	intergenic_NZ_CP025085.1-nt00841328
NZ_CP025085.1	gene	841409	841484	tRNA-His	gene-CWC46_RS03865											RefSeq	+	CWC46_RS03865	CWC46_RS03865				Gene				CWC46_03865	tRNAscan-SE	tRNA		tRNA	COORDINATES: profile:tRNAscan-SE:2.0.4
NZ_CP025085.1	intergenic	841485	841505		intergenic_NZ_CP025085.1-nt00841485											SorTnSeq	+	intergenic_NZ_CP025085.1-nt00841485
NZ_CP025085.1	gene	841506	841592	tRNA-Leu	gene-CWC46_RS03870											RefSeq	+	CWC46_RS03870	CWC46_RS03870				Gene				CWC46_03870	tRNAscan-SE	tRNA		tRNA	COORDINATES: profile:tRNAscan-SE:2.0.4
NZ_CP025085.1	intergenic	841593	841633		intergenic_NZ_CP025085.1-nt00841593											SorTnSeq	+	intergenic_NZ_CP025085.1-nt00841593
NZ_CP025085.1	gene	841634	841710	tRNA-Pro	gene-CWC46_RS03875											RefSeq	+	CWC46_RS03875	CWC46_RS03875				Gene				CWC46_03875	tRNAscan-SE	tRNA		tRNA	COORDINATES: profile:tRNAscan-SE:2.0.4
NZ_CP025085.1	intergenic	841711	842185		intergenic_NZ_CP025085.1-nt00841711	-0.200548	0.823803	1	0.649327	0.264933	0.767807	6.8022	0.458267	0.297599	1	SorTnSeq	+	intergenic_NZ_CP025085.1-nt00841711
NZ_CP025085.1	gene	842186	843514	amidohydrolase	gene-CWC46_RS03880	-0.552481	0.171065	0.800795	-0.590271	0.182081	0.68696	8.18158	0.165189	0.476278	1	RefSeq	+	CWC46_RS03880	CWC46_RS03880				Gene				CWC46_03880	Protein Homology	CDS	Genbank:WP_051391431.1	CDS	COORDINATES: similar to AA sequence:RefSeq:WP_006541704.1
NZ_CP025085.1	intergenic	843515	843753		intergenic_NZ_CP025085.1-nt00843515	-0.114504	1	1	-1.6839	0.179688	0.683602	6.09435	0.356858	0.596616	1	SorTnSeq	+	intergenic_NZ_CP025085.1-nt00843515
NZ_CP025085.1	gene	843754	844533	ABC transporter ATP-binding protein	gene-CWC46_RS03885	-0.687392	0.200035	0.830484	-0.196266	0.720205	1	7.84561	-0.0279368	1	1	RefSeq	+	CWC46_RS03885	CWC46_RS03885				Gene				CWC46_03885	Protein Homology	CDS	Genbank:WP_021013512.1	CDS	COORDINATES: similar to AA sequence:RefSeq:WP_008458014.1
NZ_CP025085.1	gene	844530	845333	ABC transporter permease	gene-CWC46_RS03890	0.552352	0.377088	0.948327	0.10714	1	1	6.9819	0.450295	0.274995	1	RefSeq	+	CWC46_RS03890	CWC46_RS03890				Gene				CWC46_03890	Protein Homology	CDS	Genbank:WP_021013511.1	CDS	COORDINATES: similar to AA sequence:RefSeq:WP_017893353.1
NZ_CP025085.1	intergenic	845334	845352		intergenic_NZ_CP025085.1-nt00845334											SorTnSeq	+	intergenic_NZ_CP025085.1-nt00845334
NZ_CP025085.1	gene	845353	846291	ABC transporter substrate-binding protein	gene-CWC46_RS03895	-1.10445	0.0154413	0.394811	0.10117	0.766607	1	8.26419	0.0551888	0.834501	1	RefSeq	+	CWC46_RS03895	CWC46_RS03895				Gene				CWC46_03895	Protein Homology	CDS	Genbank:WP_021013510.1	CDS	COORDINATES: similar to AA sequence:RefSeq:WP_015378403.1
NZ_CP025085.1	intergenic	846292	846498		intergenic_NZ_CP025085.1-nt00846292	0.297949	0.482793	0.999107	0.234374	0.566577	0.968392	7.96891	0.139132	0.62551	1	SorTnSeq	+	intergenic_NZ_CP025085.1-nt00846292
NZ_CP025085.1	gene	846499	847380	EamA family transporter	gene-CWC46_RS03900	0.399213	0.0391023	0.555135	0.432614	0.016433	0.317138	9.85522	0.0409801	0.773994	1	RefSeq	-	CWC46_RS03900	CWC46_RS03900				Gene				CWC46_03900	Protein Homology	CDS	Genbank:WP_021013509.1	CDS	COORDINATES: protein motif:HMM:NF013088.1
NZ_CP025085.1	intergenic	847381	847703		intergenic_NZ_CP025085.1-nt00847381	-0.0644544	0.828668	1	0.293162	0.200105	0.710675	9.2725	-0.0824235	0.551059	1	SorTnSeq	+	intergenic_NZ_CP025085.1-nt00847381
NZ_CP025085.1	gene	847704	848441	class I SAM-dependent methyltransferase	gene-CWC46_RS03905	-0.0917868	0.712528	1	0.219315	0.296277	0.787934	9.75552	0.0158091	0.900887	1	RefSeq	-	CWC46_RS03905	CWC46_RS03905				Gene				CWC46_03905	Protein Homology	CDS	Genbank:WP_021013508.1	CDS	COORDINATES: similar to AA sequence:RefSeq:WP_009287731.1
NZ_CP025085.1	intergenic	848442	848460		intergenic_NZ_CP025085.1-nt00848442											SorTnSeq	+	intergenic_NZ_CP025085.1-nt00848442
NZ_CP025085.1	gene	848461	849444	thymidylate synthase	gene-CWC46_RS03910	0.329393	0.0594851	0.642244	0.245806	0.162203	0.668686	10.2433	0.00660311	0.948949	1	RefSeq	-	CWC46_RS03910	CWC46_RS03910				Gene				CWC46_03910	Protein Homology	CDS	Genbank:WP_021013507.1	CDS	COORDINATES: similar to AA sequence:RefSeq:WP_015877775.1
NZ_CP025085.1	intergenic	849445	849446		intergenic_NZ_CP025085.1-nt00849445											SorTnSeq	+	intergenic_NZ_CP025085.1-nt00849445
NZ_CP025085.1	gene	849447	849902	nucleoside 2-deoxyribosyltransferase	gene-CWC46_RS03915	0.238066	0.330545	0.921205	0.13183	0.629178	0.998478	9.32976	0.036007	0.807744	1	RefSeq	-	CWC46_RS03915	CWC46_RS03915				Gene				CWC46_03915	Protein Homology	CDS	Genbank:WP_021013506.1	CDS	COORDINATES: similar to AA sequence:RefSeq:WP_004528319.1
NZ_CP025085.1	gene	849871	850413	NUDIX hydrolase	gene-CWC46_RS03920	-0.0263666	1	1	0.335293	0.110983	0.608972	9.37246	0.0939937	0.533627	1	RefSeq	-	CWC46_RS03920	CWC46_RS03920				Gene				CWC46_03920	Protein Homology	CDS	Genbank:WP_021013505.1	CDS	COORDINATES: similar to AA sequence:RefSeq:WP_004528320.1
NZ_CP025085.1	intergenic	850414	850503		intergenic_NZ_CP025085.1-nt00850414	0.131092	1	1	0.622393	0.202642	0.713282	7.34743	0.167003	0.675226	1	SorTnSeq	+	intergenic_NZ_CP025085.1-nt00850414
NZ_CP025085.1	riboswitch	850504	850608		id-NZ_CP025085.1:850504..850608	0.362462	0.402967	0.965527	0.482059	0.206741	0.718687	7.88809	-0.0145738	1	1	cmsearch	-		riboswitch	thiamine pyrophosphate	RFAM:RF00059	riboswitch	regulatory			TPP riboswitch
NZ_CP025085.1	intergenic	850609	851248		intergenic_NZ_CP025085.1-nt00850609	0.138662	0.524688	1	0.152876	0.455963	0.908499	9.58645	0.00976607	0.964689	1	SorTnSeq	+	intergenic_NZ_CP025085.1-nt00850609
NZ_CP025085.1	gene	851249	852403	MFS transporter	gene-CWC46_RS03925	0.312448	0.0394667	0.555135	0.447639	0.00205185	0.114053	10.5159	0.0323276	0.74604	1	RefSeq	+	CWC46_RS03925	CWC46_RS03925				Gene				CWC46_03925	Protein Homology	CDS	Genbank:WP_157831356.1	CDS	COORDINATES: protein motif:HMM:NF019310.1
NZ_CP025085.1	intergenic	852404	852419		intergenic_NZ_CP025085.1-nt00852404											SorTnSeq	+	intergenic_NZ_CP025085.1-nt00852404
NZ_CP025085.1	gene	852420	853616	Gfo/Idh/MocA family oxidoreductase	gene-CWC46_RS03930	0.174994	0.364924	0.941661	0.328987	0.0526577	0.49209	10.1348	0.0956464	0.399799	1	RefSeq	+	CWC46_RS03930	CWC46_RS03930				Gene				CWC46_03930	Protein Homology	CDS	Genbank:WP_021013503.1	CDS	COORDINATES: protein motif:HMM:NF013567.1%2CHMM:NF014893.1
NZ_CP025085.1	intergenic	853617	853853		intergenic_NZ_CP025085.1-nt00853617	0.0269966	1	1	0.539408	0.084226	0.578781	8.30658	0.0401277	0.94279	1	SorTnSeq	+	intergenic_NZ_CP025085.1-nt00853617
NZ_CP025085.1	gene	853854	854963	acyltransferase	gene-CWC46_RS03935	0.47175	0.00257204	0.166094	0.351352	0.0318223	0.418804	10.3266	0.0123835	0.889399	1	RefSeq	+	CWC46_RS03935	CWC46_RS03935				Gene				CWC46_03935	Protein Homology	CDS	Genbank:WP_021013502.1	CDS	COORDINATES: protein motif:HMM:NF013884.1
NZ_CP025085.1	intergenic	854964	855029		intergenic_NZ_CP025085.1-nt00854964	-0.728354	0.6875	1	0.0525864	1	1	5.57981	0.0100331	1	1	SorTnSeq	+	intergenic_NZ_CP025085.1-nt00854964
NZ_CP025085.1	gene	855030	855428	MerR family transcriptional regulator	gene-CWC46_RS03940	0.0755775	0.83226	1	-0.666042	0.114664	0.608972	8.14163	0.00428512	1	1	RefSeq	-	CWC46_RS03940	CWC46_RS03940				Gene				CWC46_03940	Protein Homology	CDS	Genbank:WP_021013501.1	CDS	COORDINATES: protein motif:HMM:NF024803.1
NZ_CP025085.1	intergenic	855429	855696		intergenic_NZ_CP025085.1-nt00855429	0.61122	0.200035	0.830484	0.742248	0.0640198	0.526908	7.73455	0.182382	0.519497	1	SorTnSeq	+	intergenic_NZ_CP025085.1-nt00855429
NZ_CP025085.1	gene	855697	856485	alpha/beta hydrolase	gene-CWC46_RS03945	0.198909	0.234175	0.845236	0.347646	0.022476	0.351589	10.3351	0.0998732	0.321643	1	RefSeq	+	CWC46_RS03945	CWC46_RS03945				Gene				CWC46_03945	Protein Homology	CDS	Genbank:WP_021013500.1	CDS	COORDINATES: protein motif:HMM:NF024109.1
NZ_CP025085.1	intergenic	856486	856594		intergenic_NZ_CP025085.1-nt00856486	0.28073	0.74926	1	0.772074	0.143868	0.636147	7.13016	-0.220426	0.635311	1	SorTnSeq	+	intergenic_NZ_CP025085.1-nt00856486
NZ_CP025085.1	gene	856595	857764	sedoheptulose 7-phosphate cyclase	gene-CWC46_RS03950	0.48876	0.000310948	0.0349871	0.317536	0.0203105	0.34508	10.7277	0.00354097	0.951904	1	RefSeq	+	CWC46_RS03950	CWC46_RS03950				Gene				CWC46_03950	Protein Homology	CDS	Genbank:WP_021013499.1	CDS	COORDINATES: protein motif:HMM:NF013887.1
NZ_CP025085.1	intergenic	857765	857845		intergenic_NZ_CP025085.1-nt00857765	-0.244045	1	1	0.601202	0.404874	0.880775	6.59687	0.469461	0.31233	1	SorTnSeq	+	intergenic_NZ_CP025085.1-nt00857765
NZ_CP025085.1	gene	857846	858886	ROK family protein	gene-CWC46_RS03955	0.100162	0.650172	1	0.0871796	0.656305	1	9.90534	-0.0169027	0.905916	1	RefSeq	+	CWC46_RS03955	CWC46_RS03955				Gene				CWC46_03955	Protein Homology	CDS	Genbank:WP_021013498.1	CDS	COORDINATES: protein motif:HMM:NF012692.1
NZ_CP025085.1	intergenic	858887	858891		intergenic_NZ_CP025085.1-nt00858887	-0.52481	1	1	-0.639527	1	1	5.35743	-0.71212	0.753907	1	SorTnSeq	+	intergenic_NZ_CP025085.1-nt00858887
NZ_CP025085.1	gene	858892	860004	alcohol dehydrogenase catalytic domain-containing protein	gene-CWC46_RS03960	0.49846	0.00290904	0.169125	0.28303	0.0846159	0.579318	10.1811	0.0549996	0.635519	1	RefSeq	+	CWC46_RS03960	CWC46_RS03960				Gene				CWC46_03960	Protein Homology	CDS	Genbank:WP_021013497.1	CDS	COORDINATES: protein motif:HMM:NF019845.1
NZ_CP025085.1	intergenic	860005	860015		intergenic_NZ_CP025085.1-nt00860005	1.17818	0.143464	0.738339	0.833561	0.332307	0.824141	6.20994	0.226795	0.850555	1	SorTnSeq	+	intergenic_NZ_CP025085.1-nt00860005
NZ_CP025085.1	gene	860016	860768	SDR family oxidoreductase	gene-CWC46_RS03965	-0.253371	0.288833	0.895025	-0.384129	0.10538	0.608972	9.29322	-0.122467	0.415615	1	RefSeq	+	CWC46_RS03965	CWC46_RS03965				Gene				CWC46_03965	Protein Homology	CDS	Genbank:WP_021013496.1	CDS	COORDINATES: protein motif:HMM:NF012334.1
NZ_CP025085.1	gene	860765	861541	hypothetical protein	gene-CWC46_RS03970	0.00417623	1	1	0.278861	0.105986	0.608972	9.99681	-0.0971139	0.397874	1	RefSeq	+	CWC46_RS03970	CWC46_RS03970				Gene				CWC46_03970	GeneMarkS-2+	CDS	Genbank:WP_021013495.1	CDS	COORDINATES: ab initio prediction:GeneMarkS-2+
NZ_CP025085.1	intergenic	861542	861545		intergenic_NZ_CP025085.1-nt00861542											SorTnSeq	+	intergenic_NZ_CP025085.1-nt00861542
NZ_CP025085.1	gene	861546	862193	HAD-IA family hydrolase	gene-CWC46_RS03975	0.148998	0.732689	1	0.200482	0.506605	0.937974	8.81693	0.0843185	0.68215	1	RefSeq	+	CWC46_RS03975	CWC46_RS03975				Gene				CWC46_03975	Protein Homology	CDS	Genbank:WP_021013494.1	CDS	COORDINATES: protein motif:HMM:NF024811.1
NZ_CP025085.1	intergenic	862194	862214		intergenic_NZ_CP025085.1-nt00862194											SorTnSeq	+	intergenic_NZ_CP025085.1-nt00862194
NZ_CP025085.1	gene	862215	862766	NUDIX hydrolase	gene-CWC46_RS03980	-1.43025	0.0576138	0.639208	-0.418719	0.532711	0.95456	7.20973	-0.0266176	1	1	RefSeq	+	CWC46_RS03980	CWC46_RS03980				Gene				CWC46_03980	Protein Homology	CDS	Genbank:WP_021013493.1	CDS	COORDINATES: similar to AA sequence:RefSeq:WP_004869023.1
NZ_CP025085.1	intergenic	862767	862818		intergenic_NZ_CP025085.1-nt00862767											SorTnSeq	+	intergenic_NZ_CP025085.1-nt00862767
NZ_CP025085.1	gene	862819	864243	alpha%2Calpha-trehalose-phosphate synthase	gene-CWC46_RS03985	-0.616186	0.14564	0.738339	-0.56737	0.192765	0.69988	8.10621	-0.150478	0.507137	1	RefSeq	-	otsA	CWC46_RS03985				Gene	otsA			CWC46_03985	Protein Homology	CDS	Genbank:WP_021013492.1	CDS	COORDINATES: similar to AA sequence:RefSeq:WP_017346552.1
NZ_CP025085.1	gene	864240	865013	trehalose-phosphatase	gene-CWC46_RS03990	-1.05661	0.0580659	0.639996	-0.610167	0.155005	0.65172	7.72651	-0.0192786	1	1	RefSeq	-	otsB	CWC46_RS03990				Gene	otsB			CWC46_03990	Protein Homology	CDS	Genbank:WP_021013491.1	CDS	COORDINATES: similar to AA sequence:RefSeq:WP_007719471.1
NZ_CP025085.1	intergenic	865014	866017		intergenic_NZ_CP025085.1-nt00865014	-0.0449857	0.933162	1	-0.135144	0.739886	1	8.80219	-0.0944089	0.641462	1	SorTnSeq	+	intergenic_NZ_CP025085.1-nt00865014
NZ_CP025085.1	gene	866018	867931	HAD-IIB family hydrolase	gene-CWC46_RS22780	0.338189	0.0369642	0.555135	0.243242	0.121903	0.608972	10.6732	-0.014016	0.922669	1	RefSeq	+	CWC46_RS22780	CWC46_RS22780				Gene					Protein Homology	CDS	Genbank:WP_021013490.1	CDS	COORDINATES: similar to AA sequence:RefSeq:WP_012987008.1
NZ_CP025085.1	gene	867924	868526	RdgB/HAM1 family non-canonical purine NTP pyrophosphatase	gene-CWC46_RS04000	0.240031	0.318272	0.9166	0.22436	0.327513	0.824017	9.64311	0.0478274	0.760252	1	RefSeq	+	rdgB	CWC46_RS04000				Gene	rdgB			CWC46_04000	Protein Homology	CDS	Genbank:WP_021013489.1	CDS	COORDINATES: protein motif:HMM:TIGR00042.1
NZ_CP025085.1	intergenic	868527	868529		intergenic_NZ_CP025085.1-nt00868527											SorTnSeq	+	intergenic_NZ_CP025085.1-nt00868527
NZ_CP025085.1	gene	868530	868772	Protein of unknown function%2C inner membrane%2CYgjV	gene-CWC46_RS04005	0.140464	0.684863	1	-0.365777	0.401818	0.880775	8.26426	-0.00874696	0.94337	1	RefSeq	+	CWC46_RS04005	CWC46_RS04005				Gene				CWC46_04005	Protein Homology	CDS	Genbank:WP_021013488.1	CDS	COORDINATES: similar to AA sequence:RefSeq:WP_010129440.1
NZ_CP025085.1	intergenic	868773	868988		intergenic_NZ_CP025085.1-nt00868773	0.086563	1	1	0.686315	0.147293	0.640598	7.53627	0.278881	0.396282	1	SorTnSeq	+	intergenic_NZ_CP025085.1-nt00868773
NZ_CP025085.1	gene	868989	869966	zinc-binding dehydrogenase	gene-CWC46_RS04010	-0.0572247	0.911073	1	-0.187417	0.660887	1	8.12407	0.0573218	0.881226	1	RefSeq	-	CWC46_RS04010	CWC46_RS04010				Gene				CWC46_04010	Protein Homology	CDS	Genbank:WP_021013487.1	CDS	COORDINATES: similar to AA sequence:RefSeq:WP_005932469.1
NZ_CP025085.1	intergenic	869967	870028		intergenic_NZ_CP025085.1-nt00869967											SorTnSeq	+	intergenic_NZ_CP025085.1-nt00869967
NZ_CP025085.1	gene	870029	870706	type 1 glutamine amidotransferase domain-containing protein	gene-CWC46_RS04015	-0.721818	0.232696	0.84081	0.303248	0.518961	0.947434	7.47291	-0.180832	0.627436	1	RefSeq	-	CWC46_RS04015	CWC46_RS04015				Gene				CWC46_04015	Protein Homology	CDS	Genbank:WP_021013486.1	CDS	COORDINATES: similar to AA sequence:RefSeq:WP_007967152.1
NZ_CP025085.1	intergenic	870707	870886		intergenic_NZ_CP025085.1-nt00870707	-0.304349	0.63046	1	0.177059	0.737557	1	7.93571	-0.0873552	0.746532	1	SorTnSeq	+	intergenic_NZ_CP025085.1-nt00870707
NZ_CP025085.1	gene	870887	871036	hypothetical protein	gene-CWC46_RS22785	0.495859	0.170247	0.798451	0.259169	0.455746	0.908499	8.10056	-0.0931458	0.694574	1	RefSeq	-	CWC46_RS22785	CWC46_RS22785				Gene					Protein Homology	CDS	Genbank:WP_157831357.1	CDS	COORDINATES: protein motif:HMM:NF013227.1
NZ_CP025085.1	intergenic	871037	871399		intergenic_NZ_CP025085.1-nt00871037	0.635411	0.0197433	0.452031	0.411901	0.153451	0.648226	8.74627	-0.026516	0.950376	1	SorTnSeq	+	intergenic_NZ_CP025085.1-nt00871037
NZ_CP025085.1	gene	871400	872431	L-idonate 5-dehydrogenase	gene-CWC46_RS04020	0.587612	7.59462e-05	0.0136622	0.526454	0.000237497	0.0284486	10.4846	-0.0253643	0.789654	1	RefSeq	+	CWC46_RS04020	CWC46_RS04020				Gene				CWC46_04020	Protein Homology	CDS	Genbank:WP_021013485.1	CDS	COORDINATES: similar to AA sequence:RefSeq:WP_001197411.1
NZ_CP025085.1	intergenic	872432	872448		intergenic_NZ_CP025085.1-nt00872432											SorTnSeq	+	intergenic_NZ_CP025085.1-nt00872432
NZ_CP025085.1	gene	872449	873213	gluconate 5-dehydrogenase	gene-CWC46_RS04025	0.392165	0.0107451	0.339984	0.552281	0.000103488	0.015796	10.4017	-0.0117789	0.972835	1	RefSeq	+	idnO	CWC46_RS04025				Gene	idnO			CWC46_04025	Protein Homology	CDS	Genbank:WP_021013484.1	CDS	COORDINATES: similar to AA sequence:RefSeq:NP_463343.1
NZ_CP025085.1	intergenic	873214	873288		intergenic_NZ_CP025085.1-nt00873214	-0.0887639	1	1	0.35103	1	1	6.43541	0.367592	0.532711	1	SorTnSeq	+	intergenic_NZ_CP025085.1-nt00873214
NZ_CP025085.1	gene	873289	874611	gluconate transporter	gene-CWC46_RS04030	0.552365	9.19181e-06	0.00308661	0.453674	0.00017872	0.0236898	10.9564	-0.00522491	1	1	RefSeq	+	CWC46_RS04030	CWC46_RS04030				Gene				CWC46_04030	Protein Homology	CDS	Genbank:WP_021013483.1	CDS	COORDINATES: similar to AA sequence:RefSeq:WP_008103467.1
NZ_CP025085.1	intergenic	874612	874665		intergenic_NZ_CP025085.1-nt00874612	0.479852	0.440802	0.982097	-0.172339	1	1	7.09445	-0.180285	0.72755	1	SorTnSeq	+	intergenic_NZ_CP025085.1-nt00874612
NZ_CP025085.1	gene	874666	875664	LacI family DNA-binding transcriptional regulator	gene-CWC46_RS04035	0.309828	0.0884045	0.694008	0.313572	0.0686944	0.535321	10.0767	0.0377258	0.792246	1	RefSeq	+	CWC46_RS04035	CWC46_RS04035				Gene				CWC46_04035	Protein Homology	CDS	Genbank:WP_021013482.1	CDS	COORDINATES: similar to AA sequence:RefSeq:WP_001309159.1
NZ_CP025085.1	intergenic	875665	875728		intergenic_NZ_CP025085.1-nt00875665	-1.67029	0.343751	0.928106	0.0546679	1	1	6.04545	-0.0804956	1	1	SorTnSeq	+	intergenic_NZ_CP025085.1-nt00875665
NZ_CP025085.1	gene	875729	876256	gluconokinase	gene-CWC46_RS04040	0.229101	0.430734	0.98128	0.463345	0.0621129	0.526908	9.01434	0.0034377	1	1	RefSeq	+	CWC46_RS04040	CWC46_RS04040				Gene				CWC46_04040	Protein Homology	CDS	Genbank:WP_021013481.1	CDS	COORDINATES: similar to AA sequence:RefSeq:WP_005599100.1
NZ_CP025085.1	intergenic	876257	876276		intergenic_NZ_CP025085.1-nt00876257											SorTnSeq	+	intergenic_NZ_CP025085.1-nt00876257
NZ_CP025085.1	gene	876277	878073	phosphogluconate dehydratase	gene-CWC46_RS04045	-0.357217	0.434047	0.982097	-0.185015	0.746537	1	8.15317	0.0330259	0.941576	1	RefSeq	+	CWC46_RS04045	CWC46_RS04045				Gene				CWC46_04045	Protein Homology	CDS	Genbank:WP_021013480.1	CDS	COORDINATES: similar to AA sequence:RefSeq:WP_012764848.1
NZ_CP025085.1	intergenic	878074	878273		intergenic_NZ_CP025085.1-nt00878074	0.594649	0.607239	1	0.157113	1	1	6.09442	-0.0731651	1	1	SorTnSeq	+	intergenic_NZ_CP025085.1-nt00878074
NZ_CP025085.1	gene	878274	879467	protoheme IX biogenesis protein HemY	gene-CWC46_RS04050	-0.090351	1	1	-0.407657	0.596616	0.982124	7.16469	0.454326	0.160583	1	RefSeq	-	hemY	CWC46_RS04050				Gene	hemY			CWC46_04050	Protein Homology	CDS	Genbank:WP_021013479.1	CDS	COORDINATES: similar to AA sequence:RefSeq:WP_012767959.1
NZ_CP025085.1	intergenic	879468	879469		intergenic_NZ_CP025085.1-nt00879468											SorTnSeq	+	intergenic_NZ_CP025085.1-nt00879468
NZ_CP025085.1	gene	879470	880606	uroporphyrinogen-III C-methyltransferase	gene-CWC46_RS04055											RefSeq	-	hemX	CWC46_RS04055				Gene	hemX			CWC46_04055	Protein Homology	CDS	Genbank:WP_021013478.1	CDS	COORDINATES: similar to AA sequence:RefSeq:WP_012886479.1
NZ_CP025085.1	intergenic	880607	880626		intergenic_NZ_CP025085.1-nt00880607											SorTnSeq	+	intergenic_NZ_CP025085.1-nt00880607
NZ_CP025085.1	gene	880627	881367	uroporphyrinogen-III synthase	gene-CWC46_RS04060											RefSeq	-	hemD	CWC46_RS04060				Gene	hemD			CWC46_04060	Protein Homology	CDS	Genbank:WP_021013477.1	CDS	COORDINATES: similar to AA sequence:RefSeq:WP_014916933.1
NZ_CP025085.1	gene	881364	882302	hydroxymethylbilane synthase	gene-CWC46_RS04065											RefSeq	-	hemC	CWC46_RS04065				Gene	hemC			CWC46_04065	Protein Homology	CDS	Genbank:WP_021013476.1	CDS	COORDINATES: similar to AA sequence:RefSeq:WP_014916932.1
NZ_CP025085.1	intergenic	882303	882634		intergenic_NZ_CP025085.1-nt00882303	0.870047	0.359285	0.934991	1.72579	0.00371929	0.157429	6.56268	0.425948	0.417695	1	SorTnSeq	+	intergenic_NZ_CP025085.1-nt00882303
NZ_CP025085.1	gene	882635	885190	class I adenylate cyclase	gene-CWC46_RS04070	-0.282276	0.33417	0.925473	2.21983	2.25825e-39	1.13748e-35	9.83684	0.429405	0.00699682	1	RefSeq	+	CWC46_RS04070	CWC46_RS04070				Gene				CWC46_04070	Protein Homology	CDS	Genbank:WP_021013475.1	CDS	COORDINATES: similar to AA sequence:RefSeq:WP_010284927.1
NZ_CP025085.1	intergenic	885191	885295		intergenic_NZ_CP025085.1-nt00885191											SorTnSeq	+	intergenic_NZ_CP025085.1-nt00885191
NZ_CP025085.1	gene	885296	885616	iron donor protein CyaY	gene-CWC46_RS04075	-4.00085	0.21875	0.835947	-1.18089	0.453125	0.907018	5.80216	0.537444	0.541257	1	RefSeq	-	cyaY	CWC46_RS04075				Gene	cyaY			CWC46_04075	Protein Homology	CDS	Genbank:WP_021013474.1	CDS	COORDINATES: similar to AA sequence:RefSeq:WP_016942886.1
NZ_CP025085.1	intergenic	885617	885693		intergenic_NZ_CP025085.1-nt00885617											SorTnSeq	+	intergenic_NZ_CP025085.1-nt00885617
NZ_CP025085.1	gene	885694	885870	outer membrane lipoprotein	gene-CWC46_RS04080											RefSeq	+	CWC46_RS04080	CWC46_RS04080				Gene				CWC46_04080	Protein Homology	CDS	Genbank:WP_021013473.1	CDS	COORDINATES: similar to AA sequence:RefSeq:WP_013319830.1
NZ_CP025085.1	intergenic	885871	885959		intergenic_NZ_CP025085.1-nt00885871											SorTnSeq	+	intergenic_NZ_CP025085.1-nt00885871
NZ_CP025085.1	gene	885960	886784	diaminopimelate epimerase	gene-CWC46_RS04085											RefSeq	+	dapF	CWC46_RS04085				Gene	dapF			CWC46_04085	Protein Homology	CDS	Genbank:WP_021013472.1	CDS	COORDINATES: similar to AA sequence:RefSeq:WP_005133314.1
NZ_CP025085.1	gene	886781	887485	DUF484 domain-containing protein	gene-CWC46_RS04090	-4.27388	0.125	0.716354	0.697488	0.423951	0.895847	5.94236	0.160956	1	1	RefSeq	+	CWC46_RS04090	CWC46_RS04090				Gene				CWC46_04090	Protein Homology	CDS	Genbank:WP_021013471.1	CDS	COORDINATES: similar to AA sequence:RefSeq:WP_015842069.1
NZ_CP025085.1	gene	887482	888393	tyrosine recombinase XerC	gene-CWC46_RS04095											RefSeq	+	xerC	CWC46_RS04095				Gene	xerC			CWC46_04095	Protein Homology	CDS	Genbank:WP_021013470.1	CDS	COORDINATES: similar to AA sequence:RefSeq:WP_006708579.1
NZ_CP025085.1	gene	888393	889109	5-amino-6-(5-phospho-D-ribitylamino)uracil phosphatase YigB	gene-CWC46_RS04100	-0.577616	0.473131	0.99597	-0.705732	0.377088	0.868094	6.92891	-0.220426	0.635311	1	RefSeq	+	yigB	CWC46_RS04100				Gene	yigB			CWC46_04100	Protein Homology	CDS	Genbank:WP_021013469.1	CDS	COORDINATES: similar to AA sequence:RefSeq:WP_013811053.1
NZ_CP025085.1	intergenic	889110	889193		intergenic_NZ_CP025085.1-nt00889110											SorTnSeq	+	intergenic_NZ_CP025085.1-nt00889110
NZ_CP025085.1	gene	889194	891356	DNA helicase II	gene-CWC46_RS04105	-0.111729	0.760318	1	-0.741924	0.265429	0.767807	7.25353	0.032914	1	1	RefSeq	+	uvrD	CWC46_RS04105				Gene	uvrD	mutU,recL		CWC46_04105	Protein Homology	CDS	Genbank:WP_021013468.1	CDS	COORDINATES: similar to AA sequence:RefSeq:WP_008455510.1
NZ_CP025085.1	intergenic	891357	891924		intergenic_NZ_CP025085.1-nt00891357	-0.47778	0.690039	1	-0.915941	0.210041	0.718687	6.72659	0.0104047	1	1	SorTnSeq	+	intergenic_NZ_CP025085.1-nt00891357
NZ_CP025085.1	gene	891925	892875	magnesium/cobalt transporter CorA	gene-CWC46_RS04110	-0.863383	0.387696	0.948327	-0.0409835	1	1	6.20984	0.227996	0.73588	1	RefSeq	+	corA	CWC46_RS04110				Gene	corA			CWC46_04110	Protein Homology	CDS	Genbank:WP_021013467.1	CDS	COORDINATES: similar to AA sequence:RefSeq:WP_004957399.1
NZ_CP025085.1	intergenic	892876	893090		intergenic_NZ_CP025085.1-nt00892876											SorTnSeq	+	intergenic_NZ_CP025085.1-nt00892876
NZ_CP025085.1	gene	893091	894149	AbrB family transcriptional regulator	gene-CWC46_RS04115	-0.872502	0.281043	0.895025	-0.744633	0.296208	0.787934	7.02031	0.000747706	1	1	RefSeq	+	CWC46_RS04115	CWC46_RS04115				Gene				CWC46_04115	Protein Homology	CDS	Genbank:WP_037380322.1	CDS	COORDINATES: similar to AA sequence:RefSeq:WP_012767972.1
NZ_CP025085.1	gene	894120	895028	EamA family transporter RarD	gene-CWC46_RS04120	0.226243	0.73588	1	-1.1908	0.184935	0.68696	7.07006	0.251605	0.499901	1	RefSeq	-	rarD	CWC46_RS04120				Gene	rarD			CWC46_04120	Protein Homology	CDS	Genbank:WP_021013465.1	CDS	COORDINATES: similar to AA sequence:RefSeq:WP_019845841.1
NZ_CP025085.1	intergenic	895029	895150		intergenic_NZ_CP025085.1-nt00895029											SorTnSeq	+	intergenic_NZ_CP025085.1-nt00895029
NZ_CP025085.1	gene	895151	895621	thioesterase family protein	gene-CWC46_RS04125	0.155435	0.84502	1	-0.756	0.523468	0.947434	6.50942	-0.495701	0.291218	1	RefSeq	-	CWC46_RS04125	CWC46_RS04125				Gene				CWC46_04125	Protein Homology	CDS	Genbank:WP_021013464.1	CDS	COORDINATES: similar to AA sequence:RefSeq:WP_002444214.1
NZ_CP025085.1	intergenic	895622	895843		intergenic_NZ_CP025085.1-nt00895622											SorTnSeq	+	intergenic_NZ_CP025085.1-nt00895622
NZ_CP025085.1	gene	895844	896713	phospholipase A	gene-CWC46_RS04130	0.219897	0.65159	1	0.0904288	0.880397	1	7.34739	0.213526	0.538399	1	RefSeq	+	pldA	CWC46_RS04130				Gene	pldA			CWC46_04130	Protein Homology	CDS	Genbank:WP_021013463.1	CDS	COORDINATES: similar to AA sequence:RefSeq:WP_012886464.1
NZ_CP025085.1	intergenic	896714	896846		intergenic_NZ_CP025085.1-nt00896714											SorTnSeq	+	intergenic_NZ_CP025085.1-nt00896714
NZ_CP025085.1	gene	896847	898673	ATP-dependent DNA helicase RecQ	gene-CWC46_RS04135	-0.322127	0.65874	1	-0.956175	0.126292	0.608972	7.33715	-0.152411	0.617304	1	RefSeq	+	recQ	CWC46_RS04135				Gene	recQ			CWC46_04135	Protein Homology	CDS	Genbank:WP_021013462.1	CDS	COORDINATES: similar to AA sequence:RefSeq:WP_012886463.1
NZ_CP025085.1	intergenic	898674	898747		intergenic_NZ_CP025085.1-nt00898674											SorTnSeq	+	intergenic_NZ_CP025085.1-nt00898674
NZ_CP025085.1	gene	898748	899368	homoserine/homoserine lactone efflux protein	gene-CWC46_RS04140	-0.171423	1	1	-0.961218	0.20049	0.710675	7.03291	0.0398979	1	1	RefSeq	-	rhtB	CWC46_RS04140				Gene	rhtB			CWC46_04140	Protein Homology	CDS	Genbank:WP_021013461.1	CDS	COORDINATES: similar to AA sequence:RefSeq:WP_017891277.1
NZ_CP025085.1	intergenic	899369	899481		intergenic_NZ_CP025085.1-nt00899369											SorTnSeq	+	intergenic_NZ_CP025085.1-nt00899369
NZ_CP025085.1	gene	899482	900474	lysophospholipase L2	gene-CWC46_RS04145	0.119436	0.882997	1	-0.133849	0.643971	1	7.42585	0.263427	0.430695	1	RefSeq	+	pldB	CWC46_RS04145				Gene	pldB			CWC46_04145	Protein Homology	CDS	Genbank:WP_021013460.1	CDS	COORDINATES: similar to AA sequence:RefSeq:WP_009111068.1
NZ_CP025085.1	intergenic	900475	900527		intergenic_NZ_CP025085.1-nt00900475											SorTnSeq	+	intergenic_NZ_CP025085.1-nt00900475
NZ_CP025085.1	gene	900528	901328	sugar/pyridoxal phosphate phosphatase YigL	gene-CWC46_RS04150	-1.23652	0.133802	0.738339	-0.182399	1	1	6.711	-0.179788	0.694006	1	RefSeq	+	yigL	CWC46_RS04150				Gene	yigL			CWC46_04150	Protein Homology	CDS	Genbank:WP_021013459.1	CDS	COORDINATES: similar to AA sequence:RefSeq:WP_005969256.1
NZ_CP025085.1	intergenic	901329	901404		intergenic_NZ_CP025085.1-nt00901329											SorTnSeq	+	intergenic_NZ_CP025085.1-nt00901329
NZ_CP025085.1	gene	901405	902754	glycerol-3-phosphate transporter	gene-CWC46_RS04155	-0.793646	0.361597	0.934991	-0.665753	0.281043	0.782459	6.87396	-0.264087	0.544616	1	RefSeq	-	glpT	CWC46_RS04155				Gene	glpT			CWC46_04155	Protein Homology	CDS	Genbank:WP_021013458.1	CDS	COORDINATES: similar to AA sequence:RefSeq:WP_005969258.1
NZ_CP025085.1	intergenic	902755	903064		intergenic_NZ_CP025085.1-nt00902755											SorTnSeq	+	intergenic_NZ_CP025085.1-nt00902755
NZ_CP025085.1	gene	903065	904708	anaerobic glycerol-3-phosphate dehydrogenase subunit A	gene-CWC46_RS04160	-0.429091	0.374156	0.948327	-0.453171	0.321088	0.817655	7.77239	-0.160791	0.613519	1	RefSeq	+	glpA	CWC46_RS04160				Gene	glpA			CWC46_04160	Protein Homology	CDS	Genbank:WP_021013457.1	CDS	COORDINATES: similar to AA sequence:RefSeq:WP_016942904.1
NZ_CP025085.1	gene	904698	905960	glycerol-3-phosphate dehydrogenase subunit GlpB	gene-CWC46_RS04165	-0.322517	0.575852	1	-0.214173	0.787708	1	7.63862	0.205233	0.53306	1	RefSeq	+	glpB	CWC46_RS04165				Gene	glpB			CWC46_04165	Protein Homology	CDS	Genbank:WP_021013456.1	CDS	COORDINATES: similar to AA sequence:RefSeq:WP_009111072.1
NZ_CP025085.1	gene	905957	907168	anaerobic glycerol-3-phosphate dehydrogenase subunit C	gene-CWC46_RS04170	-0.402861	0.463822	0.987852	-0.173783	0.72755	1	7.88787	-0.105641	0.744919	1	RefSeq	+	glpC	CWC46_RS04170				Gene	glpC			CWC46_04170	Protein Homology	CDS	Genbank:WP_021013455.1	CDS	COORDINATES: similar to AA sequence:RefSeq:WP_011095634.1
NZ_CP025085.1	intergenic	907169	907483		intergenic_NZ_CP025085.1-nt00907169	1.12278	0.343751	0.928106	-0.843395	0.6875	1	5.57984	-0.382358	0.774414	1	SorTnSeq	+	intergenic_NZ_CP025085.1-nt00907169
NZ_CP025085.1	gene	907484	908179	pirin family protein	gene-CWC46_RS04180	-1.30091	0.0335533	0.539962	-0.956174	0.126292	0.608972	7.30628	-0.0973378	0.766607	1	RefSeq	+	CWC46_RS04180	CWC46_RS04180				Gene				CWC46_04180	Protein Homology	CDS	Genbank:WP_021013454.1	CDS	COORDINATES: similar to AA sequence:RefSeq:WP_004709427.1
NZ_CP025085.1	intergenic	908180	908380		intergenic_NZ_CP025085.1-nt00908180											SorTnSeq	+	intergenic_NZ_CP025085.1-nt00908180
NZ_CP025085.1	gene	908381	909376	gluconate operon transcriptional repressor GntR	gene-CWC46_RS04185	-0.35036	0.665468	1	-0.106435	0.889885	1	7.52726	0.144517	0.706886	1	RefSeq	+	gntR	CWC46_RS04185				Gene	gntR			CWC46_04185	Protein Homology	CDS	Genbank:WP_037380370.1	CDS	COORDINATES: similar to AA sequence:RefSeq:WP_002209514.1
NZ_CP025085.1	gene	909348	909896	gluconokinase	gene-CWC46_RS04190	-0.838798	0.424358	0.975577	-5.65211	0.000728628	0.0611683	6.57971	-0.281434	0.504407	1	RefSeq	-	CWC46_RS04190	CWC46_RS04190				Gene				CWC46_04190	Protein Homology	CDS	Genbank:WP_021013452.1	CDS	COORDINATES: similar to AA sequence:RefSeq:WP_012767999.1
NZ_CP025085.1	intergenic	909897	910053		intergenic_NZ_CP025085.1-nt00909897	-0.00421695	1	1	-3.86754	0.125	0.608972	5.61374	-0.0116704	1	1	SorTnSeq	+	intergenic_NZ_CP025085.1-nt00909897
NZ_CP025085.1	gene	910054	911430	GntP family permease	gene-CWC46_RS04195	-0.488617	0.532711	1	-1.2785	0.0652466	0.528372	7.33708	0.23126	0.492651	1	RefSeq	+	CWC46_RS04195	CWC46_RS04195				Gene				CWC46_04195	Protein Homology	CDS	Genbank:WP_021013451.1	CDS	COORDINATES: similar to AA sequence:RefSeq:WP_002439015.1
NZ_CP025085.1	intergenic	911431	911498		intergenic_NZ_CP025085.1-nt00911431											SorTnSeq	+	intergenic_NZ_CP025085.1-nt00911431
NZ_CP025085.1	gene	911499	912092	YhgN family NAAT transporter	gene-CWC46_RS04200	-1.46064	0.143464	0.738339	-0.638589	0.503446	0.937974	6.50936	0.0484876	1	1	RefSeq	-	CWC46_RS04200	CWC46_RS04200				Gene				CWC46_04200	Protein Homology	CDS	Genbank:WP_021013450.1	CDS	COORDINATES: similar to AA sequence:RefSeq:WP_015842037.1
NZ_CP025085.1	intergenic	912093	912295		intergenic_NZ_CP025085.1-nt00912093	0.785731	0.548829	1	0.970808	0.266847	0.767807	5.9689	0.336728	0.831812	1	SorTnSeq	+	intergenic_NZ_CP025085.1-nt00912093
NZ_CP025085.1	gene	912296	913399	aspartate-semialdehyde dehydrogenase	gene-CWC46_RS04205											RefSeq	+	asd	CWC46_RS04205				Gene	asd			CWC46_04205	Protein Homology	CDS	Genbank:WP_021013449.1	CDS	COORDINATES: similar to AA sequence:RefSeq:WP_009111079.1
NZ_CP025085.1	intergenic	913400	913508		intergenic_NZ_CP025085.1-nt00913400											SorTnSeq	+	intergenic_NZ_CP025085.1-nt00913400
NZ_CP025085.1	gene	913509	914570	MBL fold metallo-hydrolase	gene-CWC46_RS04210	-0.35036	0.560067	1	-0.984415	0.126292	0.608972	7.41619	0.00342204	1	1	RefSeq	-	CWC46_RS04210	CWC46_RS04210				Gene				CWC46_04210	Protein Homology	CDS	Genbank:WP_021013448.1	CDS	COORDINATES: protein motif:HMM:NF012955.1
NZ_CP025085.1	intergenic	914571	914998		intergenic_NZ_CP025085.1-nt00914571	-1.26449	0.179566	0.801673	0.123824	0.831812	1	6.45424	0.137516	0.880397	1	SorTnSeq	+	intergenic_NZ_CP025085.1-nt00914571
NZ_CP025085.1	gene	914999	915397	nickel-responsive transcriptional regulator NikR	gene-CWC46_RS04215											RefSeq	+	nikR	CWC46_RS04215				Gene	nikR			CWC46_04215	Protein Homology	CDS	Genbank:WP_021013447.1	CDS	COORDINATES: similar to AA sequence:RefSeq:WP_012763911.1
NZ_CP025085.1	intergenic	915398	915671		intergenic_NZ_CP025085.1-nt00915398	-4.60573	0.0703128	0.644721	-4.6319	0.0390627	0.438943	6.02027	0.252657	0.860051	1	SorTnSeq	+	intergenic_NZ_CP025085.1-nt00915398
NZ_CP025085.1	gene	915672	916460	methyltransferase domain-containing protein	gene-CWC46_RS04220	-0.00442282	1	1	-0.132323	1	1	6.67933	0.137895	0.783848	1	RefSeq	+	CWC46_RS04220	CWC46_RS04220				Gene				CWC46_04220	Protein Homology	CDS	Genbank:WP_037380315.1	CDS	COORDINATES: similar to AA sequence:RefSeq:WP_004246727.1
NZ_CP025085.1	intergenic	916461	916520		intergenic_NZ_CP025085.1-nt00916461											SorTnSeq	+	intergenic_NZ_CP025085.1-nt00916461
NZ_CP025085.1	gene	916521	918062	nickel ABC transporter%2C nickel/metallophore periplasmic binding protein	gene-CWC46_RS04225	-0.922516	0.118923	0.716354	-0.476049	0.349685	0.842759	7.64679	0.0366917	0.930686	1	RefSeq	+	nikA	CWC46_RS04225				Gene	nikA			CWC46_04225	Protein Homology	CDS	Genbank:WP_101377533.1	CDS	COORDINATES: similar to AA sequence:RefSeq:WP_006534519.1
NZ_CP025085.1	intergenic	918063	918075		intergenic_NZ_CP025085.1-nt00918063											SorTnSeq	+	intergenic_NZ_CP025085.1-nt00918063
NZ_CP025085.1	gene	918076	919014	ABC transporter permease subunit	gene-CWC46_RS04230	-0.217381	0.703539	1	-1.33081	0.017534	0.326078	7.68721	-0.054431	0.863418	1	RefSeq	+	CWC46_RS04230	CWC46_RS04230				Gene				CWC46_04230	Protein Homology	CDS	Genbank:WP_021013444.1	CDS	COORDINATES: similar to AA sequence:RefSeq:WP_009111083.1
NZ_CP025085.1	gene	919011	919856	ABC transporter permease subunit	gene-CWC46_RS04235	-1.01612	0.0729528	0.653849	-0.927372	0.080692	0.563725	7.31665	-0.0416292	1	1	RefSeq	+	CWC46_RS04235	CWC46_RS04235				Gene				CWC46_04235	Protein Homology	CDS	Genbank:WP_021013443.1	CDS	COORDINATES: similar to AA sequence:RefSeq:WP_012763915.1
NZ_CP025085.1	intergenic	919857	919918		intergenic_NZ_CP025085.1-nt00919857											SorTnSeq	+	intergenic_NZ_CP025085.1-nt00919857
NZ_CP025085.1	gene	919919	920959	aldo/keto reductase	gene-CWC46_RS04240	-0.135488	1	1	-0.638373	0.262441	0.767807	7.58829	0.00732341	1	1	RefSeq	-	CWC46_RS04240	CWC46_RS04240				Gene				CWC46_04240	Protein Homology	CDS	Genbank:WP_021013442.1	CDS	COORDINATES: similar to AA sequence:RefSeq:NP_417474.1
NZ_CP025085.1	intergenic	920960	921303		intergenic_NZ_CP025085.1-nt00920960	0.18085	1	1	0.365348	0.80362	1	6.29602	0.460113	0.405034	1	SorTnSeq	+	intergenic_NZ_CP025085.1-nt00920960
NZ_CP025085.1	gene	921304	922623	serine dehydratase subunit alpha family protein	gene-CWC46_RS04245	0.201376	0.37866	0.948327	0.27166	0.236236	0.745168	9.38252	-0.0686491	0.664343	1	RefSeq	-	CWC46_RS04245	CWC46_RS04245				Gene				CWC46_04245	Protein Homology	CDS	Genbank:WP_021013441.1	CDS	COORDINATES: similar to AA sequence:RefSeq:WP_005281397.1
NZ_CP025085.1	intergenic	922624	923882		intergenic_NZ_CP025085.1-nt00922624	0.260218	0.0907632	0.694008	0.352775	0.0113568	0.273704	10.5504	-0.0938624	0.337723	1	SorTnSeq	+	intergenic_NZ_CP025085.1-nt00922624
NZ_CP025085.1	gene	923883	924800	nucleotidyl transferase AbiEii/AbiGii toxin family protein	gene-CWC46_RS04260	0.336891	0.261359	0.875598	-0.321628	0.359366	0.847909	8.65107	0.00464464	1	1	RefSeq	-	CWC46_RS04260	CWC46_RS04260				Gene				CWC46_04260	Protein Homology	CDS	Genbank:WP_021013440.1	CDS	COORDINATES: similar to AA sequence:RefSeq:WP_004168736.1
NZ_CP025085.1	gene	924793	925566	hypothetical protein	gene-CWC46_RS04265											RefSeq	-	CWC46_RS04265	CWC46_RS04265				Gene				CWC46_04265	Protein Homology	CDS	Genbank:WP_037380309.1	CDS	COORDINATES: similar to AA sequence:RefSeq:WP_012667836.1
NZ_CP025085.1	intergenic	925567	926367		intergenic_NZ_CP025085.1-nt00925567	-0.0779339	0.909947	1	0.0017669	1	1	8.1532	0.209352	0.375103	1	SorTnSeq	+	intergenic_NZ_CP025085.1-nt00925567
NZ_CP025085.1	gene	926368	927207	AraC family transcriptional regulator	gene-CWC46_RS04270	0.11464	0.69809	1	0.0478154	1	1	9.05173	0.0477941	0.789323	1	RefSeq	+	CWC46_RS04270	CWC46_RS04270				Gene				CWC46_04270	Protein Homology	CDS	Genbank:WP_021013437.1	CDS	COORDINATES: similar to AA sequence:RefSeq:YP_004995062.1
NZ_CP025085.1	intergenic	927208	927344		intergenic_NZ_CP025085.1-nt00927208	0.881958	0.0440481	0.580812	0.340754	0.568175	0.969149	7.56263	0.388842	0.206505	1	SorTnSeq	+	intergenic_NZ_CP025085.1-nt00927208
NZ_CP025085.1	gene	927345	927953	LysE family transporter	gene-CWC46_RS04275	0.489749	0.0205737	0.452793	0.284985	0.166512	0.676331	9.56081	-0.00864372	1	1	RefSeq	-	CWC46_RS04275	CWC46_RS04275				Gene				CWC46_04275	Protein Homology	CDS	Genbank:WP_021013435.1	CDS	COORDINATES: similar to AA sequence:RefSeq:YP_004995063.1
NZ_CP025085.1	intergenic	927954	928860		intergenic_NZ_CP025085.1-nt00927954	0.350304	0.0219486	0.456063	0.372177	0.0121651	0.284474	10.3572	-0.161455	0.105273	1	SorTnSeq	+	intergenic_NZ_CP025085.1-nt00927954
NZ_CP025085.1	gene	928861	930591	sensor histidine kinase	gene-CWC46_RS04280	-0.111676	0.821181	1	-0.175531	0.552217	0.955847	9.12109	-0.0524966	0.718167	1	RefSeq	-	CWC46_RS04280	CWC46_RS04280				Gene				CWC46_04280	Protein Homology	CDS	Genbank:WP_021013434.1	CDS	COORDINATES: similar to AA sequence:RefSeq:WP_014916902.1
NZ_CP025085.1	intergenic	930592	930976		intergenic_NZ_CP025085.1-nt00930592	0.0195163	1	1	0.300854	0.538586	0.954912	7.78744	0.182155	0.545541	1	SorTnSeq	+	intergenic_NZ_CP025085.1-nt00930592
NZ_CP025085.1	gene	930977	933163	1%2C4-alpha-glucan branching enzyme	gene-CWC46_RS04285	-0.426065	0.132831	0.738339	-0.60085	0.0324777	0.421624	9.05445	0.00133493	1	1	RefSeq	+	glgB	CWC46_RS04285				Gene	glgB			CWC46_04285	Protein Homology	CDS	Genbank:WP_021013433.1	CDS	COORDINATES: similar to AA sequence:RefSeq:WP_015731384.1
NZ_CP025085.1	gene	933160	935133	glycogen debranching protein GlgX	gene-CWC46_RS04290	-0.556846	0.165445	0.784697	-0.1934	0.613739	0.992491	8.27483	-0.0841952	0.727666	1	RefSeq	+	glgX	CWC46_RS04290				Gene	glgX			CWC46_04290	Protein Homology	CDS	Genbank:WP_021013432.1	CDS	COORDINATES: similar to AA sequence:RefSeq:WP_005969282.1
NZ_CP025085.1	intergenic	935134	935146		intergenic_NZ_CP025085.1-nt00935134											SorTnSeq	+	intergenic_NZ_CP025085.1-nt00935134
NZ_CP025085.1	gene	935147	936430	glucose-1-phosphate adenylyltransferase	gene-CWC46_RS04295	-0.889646	0.104792	0.716354	-0.733956	0.11748	0.608972	7.64679	-0.224557	0.382362	1	RefSeq	+	glgC	CWC46_RS04295				Gene	glgC			CWC46_04295	Protein Homology	CDS	Genbank:WP_021013431.1	CDS	COORDINATES: similar to AA sequence:RefSeq:WP_013319793.1
NZ_CP025085.1	intergenic	936431	936527		intergenic_NZ_CP025085.1-nt00936431	0.24505	1	1	-1.32401	0.453125	0.907018	5.8022	-0.0430696	1	1	SorTnSeq	+	intergenic_NZ_CP025085.1-nt00936431
NZ_CP025085.1	gene	936528	937961	glycogen synthase GlgA	gene-CWC46_RS04300	0.407285	0.295418	0.900099	-0.0918093	1	1	7.83864	-0.0562722	0.932204	1	RefSeq	+	glgA	CWC46_RS04300				Gene	glgA			CWC46_04300	Protein Homology	CDS	Genbank:WP_021013430.1	CDS	COORDINATES: similar to AA sequence:RefSeq:WP_013319792.1
NZ_CP025085.1	intergenic	937962	937987		intergenic_NZ_CP025085.1-nt00937962											SorTnSeq	+	intergenic_NZ_CP025085.1-nt00937962
NZ_CP025085.1	gene	937988	940435	glycogen phosphorylase	gene-CWC46_RS04305	-0.551452	0.152344	0.752309	-0.431971	0.227282	0.731718	8.67502	0.249761	0.156473	1	RefSeq	+	glgP	CWC46_RS04305				Gene	glgP			CWC46_04305	Protein Homology	CDS	Genbank:WP_021013429.1	CDS	COORDINATES: similar to AA sequence:RefSeq:WP_004930804.1
NZ_CP025085.1	intergenic	940436	940990		intergenic_NZ_CP025085.1-nt00940436	-1.54277	0.0522398	0.634651	-0.300185	0.73588	1	7.14153	0.372684	0.240799	1	SorTnSeq	+	intergenic_NZ_CP025085.1-nt00940436
NZ_CP025085.1	gene	940991	942145	mandelate racemase	gene-CWC46_RS04310	-0.0206951	1	1	-0.9027	0.0395415	0.438943	8.21521	0.161731	0.480699	1	RefSeq	+	CWC46_RS04310	CWC46_RS04310				Gene				CWC46_04310	Protein Homology	CDS	Genbank:WP_021013428.1	CDS	COORDINATES: similar to AA sequence:RefSeq:WP_011095551.1
NZ_CP025085.1	intergenic	942146	942552		intergenic_NZ_CP025085.1-nt00942146	-1.03742	0.423951	0.975577	-0.611618	0.607239	0.986286	6.25354	0.12036	0.871415	1	SorTnSeq	+	intergenic_NZ_CP025085.1-nt00942146
NZ_CP025085.1	gene	942553	943131	peptidylprolyl isomerase A	gene-CWC46_RS04315	-0.138082	1	1	-0.972576	0.237886	0.745168	6.33724	-0.543499	0.336786	1	RefSeq	+	ppiA	CWC46_RS04315				Gene	ppiA	rotA		CWC46_04315	Protein Homology	CDS	Genbank:WP_021013427.1	CDS	COORDINATES: similar to AA sequence:RefSeq:WP_016942962.1
NZ_CP025085.1	intergenic	943132	943167		intergenic_NZ_CP025085.1-nt00943132											SorTnSeq	+	intergenic_NZ_CP025085.1-nt00943132
NZ_CP025085.1	gene	943168	944739	diguanylate cyclase	gene-CWC46_RS04320	-1.15956	0.0331453	0.539962	-0.302893	0.396129	0.880775	7.922	0.186271	0.482316	1	RefSeq	-	CWC46_RS04320	CWC46_RS04320				Gene				CWC46_04320	Protein Homology	CDS	Genbank:WP_021013426.1	CDS	COORDINATES: similar to AA sequence:RefSeq:WP_012763985.1
NZ_CP025085.1	intergenic	944740	945330		intergenic_NZ_CP025085.1-nt00944740	-0.321062	0.742831	1	-0.855413	0.162757	0.668686	7.18739	0.138657	0.752036	1	SorTnSeq	+	intergenic_NZ_CP025085.1-nt00944740
NZ_CP025085.1	gene	945331	946593	hypothetical protein	gene-CWC46_RS04325	-0.458076	0.391606	0.948327	-0.58738	0.143868	0.636147	7.62195	0.244547	0.374965	1	RefSeq	-	CWC46_RS04325	CWC46_RS04325				Gene				CWC46_04325	Protein Homology	CDS	Genbank:WP_021013425.1	CDS	COORDINATES: similar to AA sequence:RefSeq:WP_015731344.1
NZ_CP025085.1	intergenic	946594	946760		intergenic_NZ_CP025085.1-nt00946594											SorTnSeq	+	intergenic_NZ_CP025085.1-nt00946594
NZ_CP025085.1	gene	946761	947894	polysaccharide lyase	gene-CWC46_RS04330	0.339275	0.560067	1	0.209593	0.665468	1	7.42594	0.138762	0.762039	1	RefSeq	-	CWC46_RS04330	CWC46_RS04330				Gene				CWC46_04330	Protein Homology	CDS	Genbank:WP_021013424.1	CDS	COORDINATES: similar to AA sequence:RefSeq:WP_014701648.1
NZ_CP025085.1	intergenic	947895	948402		intergenic_NZ_CP025085.1-nt00947895	-0.305885	1	1	-0.428031	1	1	5.77246	-0.175536	0.823803	1	SorTnSeq	+	intergenic_NZ_CP025085.1-nt00947895
NZ_CP025085.1	gene	948403	949539	polysaccharide lyase	gene-CWC46_RS04335	0.185627	0.880397	1	-0.707829	0.255877	0.767175	7.37723	0.353687	0.27602	1	RefSeq	-	CWC46_RS04335	CWC46_RS04335				Gene				CWC46_04335	Protein Homology	CDS	Genbank:WP_021013423.1	CDS	COORDINATES: similar to AA sequence:RefSeq:WP_014701648.1
NZ_CP025085.1	intergenic	949540	949828		intergenic_NZ_CP025085.1-nt00949540											SorTnSeq	+	intergenic_NZ_CP025085.1-nt00949540
NZ_CP025085.1	gene	949829	950230	NADH:flavin oxidoreductase/NADH oxidase	gene-CWC46_RS04340	0.0404978	1	1	-0.749226	0.44207	0.907018	6.85989	-0.0482868	1	1	RefSeq	-	CWC46_RS04340	CWC46_RS04340				Gene				CWC46_04340	Protein Homology	CDS	Genbank:WP_021013422.1	CDS	COORDINATES: similar to AA sequence:RefSeq:WP_013512455.1
NZ_CP025085.1	intergenic	950231	950349		intergenic_NZ_CP025085.1-nt00950231											SorTnSeq	+	intergenic_NZ_CP025085.1-nt00950231
NZ_CP025085.1	gene	950350	951117	enoyl-CoA hydratase/isomerase family protein	gene-CWC46_RS04345	-0.833612	0.361597	0.934991	-0.488755	0.486852	0.930301	6.99478	-0.029813	1	1	RefSeq	-	CWC46_RS04345	CWC46_RS04345				Gene				CWC46_04345	Protein Homology	CDS	Genbank:WP_101377469.1	CDS	COORDINATES: similar to AA sequence:RefSeq:WP_007565475.1
NZ_CP025085.1	intergenic	951118	951244		intergenic_NZ_CP025085.1-nt00951118											SorTnSeq	+	intergenic_NZ_CP025085.1-nt00951118
NZ_CP025085.1	gene	951245	952123	LysR family transcriptional regulator	gene-CWC46_RS04350	-1.12801	0.0884313	0.694008	-1.03929	0.0961437	0.600778	7.45407	0.0893947	0.780742	1	RefSeq	-	CWC46_RS04350	CWC46_RS04350				Gene				CWC46_04350	Protein Homology	CDS	Genbank:WP_021013420.1	CDS	COORDINATES: similar to AA sequence:RefSeq:WP_009025850.1
NZ_CP025085.1	intergenic	952124	952246		intergenic_NZ_CP025085.1-nt00952124											SorTnSeq	+	intergenic_NZ_CP025085.1-nt00952124
NZ_CP025085.1	gene	952247	952879	glutathione S-transferase	gene-CWC46_RS04355	-0.910371	0.20049	0.830484	-1.34868	0.0241201	0.362665	6.96873	-0.143243	0.731011	1	RefSeq	+	CWC46_RS04355	CWC46_RS04355				Gene				CWC46_04355	Protein Homology	CDS	Genbank:WP_021013419.1	CDS	COORDINATES: similar to AA sequence:RefSeq:WP_013040283.1
NZ_CP025085.1	intergenic	952880	952911		intergenic_NZ_CP025085.1-nt00952880											SorTnSeq	+	intergenic_NZ_CP025085.1-nt00952880
NZ_CP025085.1	pseudogene	952912	953181	AhpC/TSA family protein	gene-CWC46_RS04360	0.221596	1	1	-0.215784	0.804202	1	6.31679	0.0508763	1	1	RefSeq	+	CWC46_RS04360	CWC46_RS04360			partialpseudo	Gene				CWC46_04360	Protein Homology	CDS		CDS	COORDINATES: similar to AA sequence:RefSeq:WP_014247279.1	incomplete%3B partial in the middle of a contig%3B missing N-terminus
NZ_CP025085.1	intergenic	953182	953232		intergenic_NZ_CP025085.1-nt00953182											SorTnSeq	+	intergenic_NZ_CP025085.1-nt00953182
NZ_CP025085.1	gene	953233	953949	SDR family oxidoreductase	gene-CWC46_RS04365	0.307285	0.568175	1	-0.806035	0.26819	0.767807	7.31675	-0.0298714	1	1	RefSeq	+	CWC46_RS04365	CWC46_RS04365				Gene				CWC46_04365	Protein Homology	CDS	Genbank:WP_021013417.1	CDS	COORDINATES: similar to AA sequence:RefSeq:WP_006612611.1
NZ_CP025085.1	intergenic	953950	954869		intergenic_NZ_CP025085.1-nt00953950	-1.12801	0.0659955	0.644721	-0.683973	0.193415	0.69988	7.3167	-0.322669	0.319734	1	SorTnSeq	+	intergenic_NZ_CP025085.1-nt00953950
NZ_CP025085.1	pseudogene	954870	955754	integrase arm-type DNA-binding domain-containing protein	gene-CWC46_RS04370	-0.107316	1	1	-0.385996	0.532711	0.95456	7.30636	0.118615	0.837558	1	RefSeq	+	CWC46_RS04370	CWC46_RS04370			partialpseudo	Gene				CWC46_04370	Protein Homology	CDS		CDS	COORDINATES: similar to AA sequence:RefSeq:WP_012886381.1	internal stop%3B incomplete%3B partial in the middle of a contig%3B missing C-terminus
NZ_CP025085.1	intergenic	955755	955792		intergenic_NZ_CP025085.1-nt00955755											SorTnSeq	+	intergenic_NZ_CP025085.1-nt00955755
NZ_CP025085.1	gene	955793	957318	IS3 family transposase	gene-CWC46_RS04375	0.965626	0.237886	0.849808	1.02638	0.189248	0.692764	6.35752	0.252658	0.728334	1	RefSeq	-	CWC46_RS04375	CWC46_RS04375				Gene				CWC46_04375	Protein Homology	CDS	Genbank:WP_101377470.1	CDS	COORDINATES: similar to AA sequence:RefSeq:WP_076611200.1	programmed frameshift
NZ_CP025085.1	intergenic	957319	957390		intergenic_NZ_CP025085.1-nt00957319											SorTnSeq	+	intergenic_NZ_CP025085.1-nt00957319
NZ_CP025085.1	pseudogene	957391	957690	tyrosine-type recombinase/integrase	gene-CWC46_RS04380	0.06882	1	1	0.606882	0.410643	0.887729	6.54508	0.266349	0.659073	1	RefSeq	+	CWC46_RS04380	CWC46_RS04380			partialpseudo	Gene				CWC46_04380	Protein Homology	CDS		CDS	COORDINATES: similar to AA sequence:RefSeq:WP_003283548.1	incomplete%3B partial in the middle of a contig%3B missing N-terminus
NZ_CP025085.1	intergenic	957691	957882		intergenic_NZ_CP025085.1-nt00957691	-3.84215	0.125	0.716354	1.38519	0.0922857	0.591613	5.99485	0.957406	0.168639	1	SorTnSeq	+	intergenic_NZ_CP025085.1-nt00957691
NZ_CP025085.1	gene	957883	958443	hypothetical protein	gene-CWC46_RS04385											RefSeq	-	CWC46_RS04385	CWC46_RS04385				Gene				CWC46_04385	Protein Homology	CDS	Genbank:WP_021013411.1	CDS	COORDINATES: similar to AA sequence:RefSeq:WP_002439792.1
NZ_CP025085.1	intergenic	958444	958520		intergenic_NZ_CP025085.1-nt00958444											SorTnSeq	+	intergenic_NZ_CP025085.1-nt00958444
NZ_CP025085.1	gene	958521	958745	hypothetical protein	gene-CWC46_RS04390											RefSeq	-	CWC46_RS04390	CWC46_RS04390				Gene				CWC46_04390	Protein Homology	CDS	Genbank:WP_021013410.1	CDS	COORDINATES: similar to AA sequence:RefSeq:WP_004919708.1
NZ_CP025085.1	intergenic	958746	958981		intergenic_NZ_CP025085.1-nt00958746	-1.8555	0.226563	0.835947	-0.130685	1	1	6.29596	0.395279	0.5224	1	SorTnSeq	+	intergenic_NZ_CP025085.1-nt00958746
NZ_CP025085.1	gene	958982	959296	transposase	gene-CWC46_RS04395	0.0766123	1	1	-0.88012	0.264933	0.767807	7.0454	0.188037	0.648794	1	RefSeq	+	CWC46_RS04395	CWC46_RS04395				Gene				CWC46_04395	Protein Homology	CDS	Genbank:WP_071790825.1	CDS	COORDINATES: protein motif:HMM:NF018933.1
NZ_CP025085.1	intergenic	959297	959505		intergenic_NZ_CP025085.1-nt00959297	-1.78745	0.0783547	0.669728	0.172917	0.860051	1	6.69528	-0.281434	0.504407	1	SorTnSeq	+	intergenic_NZ_CP025085.1-nt00959297
NZ_CP025085.1	gene	959506	959964	hypothetical protein	gene-CWC46_RS04400	-0.0416843	1	1	-0.330857	0.488687	0.931335	7.99483	-0.0410602	0.937792	1	RefSeq	+	CWC46_RS04400	CWC46_RS04400				Gene				CWC46_04400	GeneMarkS-2+	CDS	Genbank:WP_157831358.1	CDS	COORDINATES: ab initio prediction:GeneMarkS-2+
NZ_CP025085.1	intergenic	959965	960056		intergenic_NZ_CP025085.1-nt00959965											SorTnSeq	+	intergenic_NZ_CP025085.1-nt00959965
NZ_CP025085.1	gene	960057	960509	hypothetical protein	gene-CWC46_RS04405	0.516339	0.237051	0.849808	-0.0781952	1	1	7.50048	-0.0705699	0.92195	1	RefSeq	-	CWC46_RS04405	CWC46_RS04405				Gene				CWC46_04405	Protein Homology	CDS	Genbank:WP_037380365.1	CDS	COORDINATES: similar to AA sequence:RefSeq:WP_009088610.1
NZ_CP025085.1	intergenic	960510	960747		intergenic_NZ_CP025085.1-nt00960510	0.142943	1	1	0.488229	0.523468	0.947434	6.43545	0.105414	0.87463	1	SorTnSeq	+	intergenic_NZ_CP025085.1-nt00960510
NZ_CP025085.1	gene	960748	961071	DNA-binding transcriptional regulator	gene-CWC46_RS04410											RefSeq	-	CWC46_RS04410	CWC46_RS04410				Gene				CWC46_04410	Protein Homology	CDS	Genbank:WP_021013407.1	CDS	COORDINATES: similar to AA sequence:RefSeq:NP_462677.1
NZ_CP025085.1	gene	961055	961414	type II toxin-antitoxin system RelE/ParE family toxin	gene-CWC46_RS04415											RefSeq	-	CWC46_RS04415	CWC46_RS04415				Gene				CWC46_04415	Protein Homology	CDS	Genbank:WP_021013406.1	CDS	COORDINATES: similar to AA sequence:RefSeq:WP_015848016.1
NZ_CP025085.1	intergenic	961415	962422		intergenic_NZ_CP025085.1-nt00961415	-0.674526	0.177004	0.801673	0.184612	0.720205	1	7.74968	-0.0321847	0.931203	1	SorTnSeq	+	intergenic_NZ_CP025085.1-nt00961415
NZ_CP025085.1	gene	962423	963301	integrase catalytic domain	gene-CWC46_RS04435	-0.945749	0.0919167	0.694008	-0.499285	0.358147	0.847909	7.57109	-0.204325	0.470858	1	RefSeq	+	CWC46_RS04435	CWC46_RS04435				Gene				CWC46_04435	Protein Homology	CDS	Genbank:WP_021013403.1	CDS	COORDINATES: similar to AA sequence:RefSeq:WP_013316110.1
NZ_CP025085.1	pseudogene	963301	963477	AlpA family transcriptional regulator	gene-CWC46_RS04440											RefSeq	+	CWC46_RS04440	CWC46_RS04440			partialpseudo	Gene				CWC46_04440	Protein Homology	CDS		CDS	COORDINATES: similar to AA sequence:RefSeq:WP_012886376.1	incomplete%3B partial in the middle of a contig%3B missing C-terminus
NZ_CP025085.1	gene	963455	963871	hypothetical protein	gene-CWC46_RS04445	0.538575	0.667176	1	-0.767137	0.45839	0.908662	6.35743	-0.177953	0.873959	1	RefSeq	+	CWC46_RS04445	CWC46_RS04445				Gene				CWC46_04445	Protein Homology	CDS	Genbank:WP_084297567.1	CDS	COORDINATES: similar to AA sequence:RefSeq:WP_019843646.1
NZ_CP025085.1	gene	963864	965900	AAA family ATPase	gene-CWC46_RS04450	-0.13832	0.839216	1	-0.268652	0.546719	0.954912	8.30638	-0.0984989	0.676768	1	RefSeq	+	CWC46_RS04450	CWC46_RS04450				Gene				CWC46_04450	Protein Homology	CDS	Genbank:WP_021013400.1	CDS	COORDINATES: similar to AA sequence:RefSeq:WP_019843647.1
NZ_CP025085.1	intergenic	965901	966389		intergenic_NZ_CP025085.1-nt00965901	0.748283	0.332307	0.921205	-0.341815	1	1	6.1648	0.0102782	1	1	SorTnSeq	+	intergenic_NZ_CP025085.1-nt00965901
NZ_CP025085.1	gene	966390	966965	aminodeoxychorismate synthase component II	gene-CWC46_RS04460	-0.969573	0.359285	0.934991	0.589427	0.361597	0.848724	6.69529	0.137894	0.891924	1	RefSeq	+	CWC46_RS04460	CWC46_RS04460				Gene				CWC46_04460	Protein Homology	CDS	Genbank:WP_021013399.1	CDS	COORDINATES: similar to AA sequence:RefSeq:WP_015841954.1
NZ_CP025085.1	intergenic	966966	967084		intergenic_NZ_CP025085.1-nt00966966											SorTnSeq	+	intergenic_NZ_CP025085.1-nt00966966
NZ_CP025085.1	gene	967085	968308	aspartate aminotransferase family protein	gene-CWC46_RS04465	-0.224325	0.783848	1	-0.353897	0.49662	0.937974	7.56249	-0.0350464	0.926705	1	RefSeq	+	CWC46_RS04465	CWC46_RS04465				Gene				CWC46_04465	Protein Homology	CDS	Genbank:WP_021013398.1	CDS	COORDINATES: similar to AA sequence:RefSeq:WP_019845172.1
NZ_CP025085.1	intergenic	968309	968370		intergenic_NZ_CP025085.1-nt00968309											SorTnSeq	+	intergenic_NZ_CP025085.1-nt00968309
NZ_CP025085.1	gene	968371	969003	cAMP-activated global transcriptional regulator CRP	gene-CWC46_RS04470	0.253856	0.860051	1	2.99893	2.35647e-21	2.96738e-18	7.75796	0.810645	0.0105478	1	RefSeq	-	crp	CWC46_RS04470				Gene	crp			CWC46_04470	Protein Homology	CDS	Genbank:WP_021013397.1	CDS	COORDINATES: similar to AA sequence:RefSeq:NP_312235.1
NZ_CP025085.1	intergenic	969004	969324		intergenic_NZ_CP025085.1-nt00969004	-0.0908934	1	1	1.70392	1.46348e-07	4.3362e-05	7.80257	0.121939	0.778879	1	SorTnSeq	+	intergenic_NZ_CP025085.1-nt00969004
NZ_CP025085.1	gene	969325	969732	OsmC family protein	gene-CWC46_RS04475	-0.172023	0.760793	1	-0.806036	0.199593	0.710675	7.32694	0.106594	0.840824	1	RefSeq	+	CWC46_RS04475	CWC46_RS04475				Gene				CWC46_04475	Protein Homology	CDS	Genbank:WP_021013396.1	CDS	COORDINATES: similar to AA sequence:RefSeq:WP_010297044.1
NZ_CP025085.1	intergenic	969733	969873		intergenic_NZ_CP025085.1-nt00969733	-0.296332	0.671813	1	0.108252	0.895684	1	7.50943	-0.154576	0.630639	1	SorTnSeq	+	intergenic_NZ_CP025085.1-nt00969733
NZ_CP025085.1	gene	969874	970833	LysR family transcriptional regulator	gene-CWC46_RS04480	0.363534	0.0536945	0.636375	0.502998	0.00398482	0.161867	9.90925	0.0380664	0.747054	1	RefSeq	-	CWC46_RS04480	CWC46_RS04480				Gene				CWC46_04480	Protein Homology	CDS	Genbank:WP_021013395.1	CDS	COORDINATES: similar to AA sequence:RefSeq:WP_013201423.1
NZ_CP025085.1	intergenic	970834	971026		intergenic_NZ_CP025085.1-nt00970834	0.0355072	1	1	0.812054	0.103807	0.608972	7.17627	0.0801419	0.908778	1	SorTnSeq	+	intergenic_NZ_CP025085.1-nt00970834
NZ_CP025085.1	gene	971027	972454	argininosuccinate lyase	gene-CWC46_RS04485	0.192194	0.471295	0.99597	-0.15445	0.623201	0.998478	8.89835	-0.0445001	0.821181	1	RefSeq	+	argH	CWC46_RS04485				Gene	argH			CWC46_04485	Protein Homology	CDS	Genbank:WP_021013394.1	CDS	COORDINATES: similar to AA sequence:RefSeq:WP_013201424.1
NZ_CP025085.1	intergenic	972455	972488		intergenic_NZ_CP025085.1-nt00972455											SorTnSeq	+	intergenic_NZ_CP025085.1-nt00972455
NZ_CP025085.1	gene	972489	973367	amino acid ABC transporter permease	gene-CWC46_RS04490	-0.323354	0.620148	1	-0.175971	0.63046	0.999222	7.77245	-0.243969	0.392996	1	RefSeq	+	CWC46_RS04490	CWC46_RS04490				Gene				CWC46_04490	Protein Homology	CDS	Genbank:WP_021013393.1	CDS	COORDINATES: similar to AA sequence:RefSeq:WP_013508405.1
NZ_CP025085.1	intergenic	973368	973393		intergenic_NZ_CP025085.1-nt00973368											SorTnSeq	+	intergenic_NZ_CP025085.1-nt00973368
NZ_CP025085.1	gene	973394	974158	amino acid ABC transporter ATP-binding protein	gene-CWC46_RS04495	-1.37579	0.107753	0.716354	-0.538704	0.584666	0.971935	7.04534	0.485793	0.15068	1	RefSeq	+	CWC46_RS04495	CWC46_RS04495				Gene				CWC46_04495	Protein Homology	CDS	Genbank:WP_021013392.1	CDS	COORDINATES: similar to AA sequence:RefSeq:WP_007887797.1
NZ_CP025085.1	intergenic	974159	974179		intergenic_NZ_CP025085.1-nt00974159	0.377673	1	1	-3.48508	0.25	0.761797	5.43542	-0.171412	1	1	SorTnSeq	+	intergenic_NZ_CP025085.1-nt00974159
NZ_CP025085.1	gene	974180	975007	ABC transporter substrate-binding protein	gene-CWC46_RS04500	0.0355075	1	1	-1.6284	0.0522398	0.491337	6.9688	-0.0257295	1	1	RefSeq	+	CWC46_RS04500	CWC46_RS04500				Gene				CWC46_04500	Protein Homology	CDS	Genbank:WP_021013391.1	CDS	COORDINATES: similar to AA sequence:RefSeq:WP_013575490.1
NZ_CP025085.1	intergenic	975008	975032		intergenic_NZ_CP025085.1-nt00975008											SorTnSeq	+	intergenic_NZ_CP025085.1-nt00975008
NZ_CP025085.1	gene	975033	975887	polysaccharide deacetylase	gene-CWC46_RS04505	-0.0619096	1	1	-0.189835	1	1	6.67932	0.0315757	1	1	RefSeq	+	CWC46_RS04505	CWC46_RS04505				Gene				CWC46_04505	Protein Homology	CDS	Genbank:WP_021013390.1	CDS	COORDINATES: similar to AA sequence:RefSeq:WP_013201428.1
NZ_CP025085.1	gene	975880	976758	polysaccharide deacetylase	gene-CWC46_RS04510	0.185627	0.880397	1	-0.924806	0.0895325	0.591613	7.24274	0.0399527	1	1	RefSeq	+	CWC46_RS04510	CWC46_RS04510				Gene				CWC46_04510	Protein Homology	CDS	Genbank:WP_021013389.1	CDS	COORDINATES: similar to AA sequence:RefSeq:WP_008008570.1
NZ_CP025085.1	gene	976755	978116	MmgE/PrpD family protein	gene-CWC46_RS04515	0.381947	0.449966	0.982097	0.325272	0.457025	0.908662	7.77252	0.10902	0.722792	1	RefSeq	+	CWC46_RS04515	CWC46_RS04515				Gene				CWC46_04515	Protein Homology	CDS	Genbank:WP_037380298.1	CDS	COORDINATES: similar to AA sequence:RefSeq:WP_013508410.1
NZ_CP025085.1	intergenic	978117	978216		intergenic_NZ_CP025085.1-nt00978117											SorTnSeq	+	intergenic_NZ_CP025085.1-nt00978117
NZ_CP025085.1	gene	978217	979431	aspartate aminotransferase family protein	gene-CWC46_RS04520	-0.471757	0.36038	0.934991	-0.192196	0.887726	1	7.44482	0.0317942	1	1	RefSeq	+	CWC46_RS04520	CWC46_RS04520				Gene				CWC46_04520	Protein Homology	CDS	Genbank:WP_021013387.1	CDS	COORDINATES: similar to AA sequence:RefSeq:WP_009113025.1
NZ_CP025085.1	intergenic	979432	979456		intergenic_NZ_CP025085.1-nt00979432											SorTnSeq	+	intergenic_NZ_CP025085.1-nt00979432
NZ_CP025085.1	gene	979457	980494	arginine N-succinyltransferase	gene-CWC46_RS04525	-0.195219	0.798154	1	-0.430664	0.44263	0.907018	7.77986	0.102747	0.736361	1	RefSeq	+	astA	CWC46_RS04525				Gene	astA			CWC46_04525	Protein Homology	CDS	Genbank:WP_021013386.1	CDS	COORDINATES: similar to AA sequence:RefSeq:WP_012145566.1
NZ_CP025085.1	gene	980494	981969	succinylglutamate-semialdehyde dehydrogenase	gene-CWC46_RS04530	-0.558303	0.331753	0.921205	-0.31442	0.504407	0.937974	7.622	0.00132836	1	1	RefSeq	+	astD	CWC46_RS04530				Gene	astD			CWC46_04530	Protein Homology	CDS	Genbank:WP_021013385.1	CDS	COORDINATES: similar to AA sequence:RefSeq:WP_019082994.1
NZ_CP025085.1	intergenic	981970	981996		intergenic_NZ_CP025085.1-nt00981970											SorTnSeq	+	intergenic_NZ_CP025085.1-nt00981970
NZ_CP025085.1	gene	981997	983337	N-succinylarginine dihydrolase	gene-CWC46_RS04535	-0.721818	0.301999	0.900099	-0.3991	0.479891	0.922363	7.50028	0.0668166	0.852158	1	RefSeq	+	astB	CWC46_RS04535				Gene	astB			CWC46_04535	Protein Homology	CDS	Genbank:WP_101377534.1	CDS	COORDINATES: similar to AA sequence:RefSeq:YP_004996862.1
NZ_CP025085.1	intergenic	983338	983342		intergenic_NZ_CP025085.1-nt00983338											SorTnSeq	+	intergenic_NZ_CP025085.1-nt00983338
NZ_CP025085.1	gene	983343	984347	succinylglutamate desuccinylase	gene-CWC46_RS04540	-1.52417	0.0288175	0.517272	-0.867979	0.153862	0.648226	7.16465	-0.275002	0.401818	1	RefSeq	+	astE	CWC46_RS04540				Gene	astE			CWC46_04540	Protein Homology	CDS	Genbank:WP_037380296.1	CDS	COORDINATES: similar to AA sequence:RefSeq:WP_011055562.1
NZ_CP025085.1	intergenic	984348	984378		intergenic_NZ_CP025085.1-nt00984348											SorTnSeq	+	intergenic_NZ_CP025085.1-nt00984348
NZ_CP025085.1	gene	984379	985248	phosphoribulokinase	gene-CWC46_RS04545	0.300178	0.655458	1	-0.707641	0.328868	0.824141	7.28549	0.0970246	0.83982	1	RefSeq	-	CWC46_RS04545	CWC46_RS04545				Gene				CWC46_04545	Protein Homology	CDS	Genbank:WP_021013382.1	CDS	COORDINATES: similar to AA sequence:RefSeq:WP_015962172.1
NZ_CP025085.1	intergenic	985249	985377		intergenic_NZ_CP025085.1-nt00985249											SorTnSeq	+	intergenic_NZ_CP025085.1-nt00985249
NZ_CP025085.1	gene	985378	985614	YheU family protein	gene-CWC46_RS04550	-0.384226	0.62906	1	-0.907249	0.480683	0.922363	6.49121	0.177666	0.770868	1	RefSeq	-	CWC46_RS04550	CWC46_RS04550				Gene				CWC46_04550	Protein Homology	CDS	Genbank:WP_021013381.1	CDS	COORDINATES: similar to AA sequence:RefSeq:WP_012886367.1
NZ_CP025085.1	intergenic	985615	985615		intergenic_NZ_CP025085.1-nt00985615											SorTnSeq	+	intergenic_NZ_CP025085.1-nt00985615
NZ_CP025085.1	gene	985616	986608	hydrolase	gene-CWC46_RS04555	-2.13259	0.0289598	0.517272	-0.744633	0.296208	0.787934	6.96872	-0.0336878	1	1	RefSeq	-	CWC46_RS04555	CWC46_RS04555				Gene				CWC46_04555	Protein Homology	CDS	Genbank:WP_021013380.1	CDS	COORDINATES: similar to AA sequence:RefSeq:WP_012764010.1
NZ_CP025085.1	intergenic	986609	986689		intergenic_NZ_CP025085.1-nt00986609	0.24505	1	1	-0.428031	1	1	5.83135	-0.0430699	1	1	SorTnSeq	+	intergenic_NZ_CP025085.1-nt00986609
NZ_CP025085.1	gene	986690	987295	LysE family translocator	gene-CWC46_RS04560	-0.26042	1	1	-0.38781	0.67764	1	6.50941	-0.302702	0.461394	1	RefSeq	+	CWC46_RS04560	CWC46_RS04560				Gene				CWC46_04560	Protein Homology	CDS	Genbank:WP_021013379.1	CDS	COORDINATES: similar to AA sequence:RefSeq:WP_012768077.1
NZ_CP025085.1	intergenic	987296	987343		intergenic_NZ_CP025085.1-nt00987296											SorTnSeq	+	intergenic_NZ_CP025085.1-nt00987296
NZ_CP025085.1	gene	987344	989275	ABC transporter ATP-binding protein	gene-CWC46_RS04565	0.215362	0.671813	1	-0.257791	0.65874	1	7.50937	0.208785	0.504691	1	RefSeq	-	CWC46_RS04565	CWC46_RS04565				Gene				CWC46_04565	Protein Homology	CDS	Genbank:WP_021013378.1	CDS	COORDINATES: similar to AA sequence:RefSeq:WP_016930336.1
NZ_CP025085.1	intergenic	989276	989401		intergenic_NZ_CP025085.1-nt00989276											SorTnSeq	+	intergenic_NZ_CP025085.1-nt00989276
NZ_CP025085.1	gene	989402	989953	glutathione-regulated potassium-efflux system ancillary protein KefG	gene-CWC46_RS04570	0.388013	1	1	-0.284908	1	1	5.9154	0.537444	0.541257	1	RefSeq	+	kefG	CWC46_RS04570				Gene	kefG			CWC46_04570	Protein Homology	CDS	Genbank:WP_021013377.1	CDS	COORDINATES: similar to AA sequence:RefSeq:WP_012764013.1
NZ_CP025085.1	intergenic	989954	989954		intergenic_NZ_CP025085.1-nt00989954											SorTnSeq	+	intergenic_NZ_CP025085.1-nt00989954
[truncated: 6,622 more rows]
